# Supplementary material for: 2-Methylpyrrolidine derived 1,10-phenanthroline-2,9-diamides: promising extractants for Am(iii)/Ln(iii) separation
Source: Royal Society of Chemistry journal article supplement (doi:10.1039/d2qi00803c), 2022-01-01
Supplement: d2qi00803c1.pdf [file d2qi00803c1.pdf]

## Electronic Supplementary Information

### 2-Methylpyrrolidine Derived 1,10-Phenanthroline-2,9-diamides: New Ligands for Ln(III)/Am(III) Separation

**P.S. Lemport,<sup>1†</sup> M.V. Evsunina,<sup>1†</sup> P.I. Matveev,<sup>1†</sup> A.S. Pozdeev,<sup>1</sup> V.S. Petrov,<sup>1</sup> E. K. Khult,<sup>2</sup> Yu.V. Nelyubina,<sup>3</sup> K.L. Isakovskaya,<sup>3,4</sup> V.A. Roznyatovsky,<sup>1</sup> I.P. Gloriov,<sup>1</sup> B.N. Tarasevich,<sup>1</sup> A.S. Aldoshin,<sup>1</sup> V.G. Petrov,<sup>1</sup> S.N. Kalmykov,<sup>1</sup> Yu. A. Ustynyuk,<sup>1</sup> V.G. Nenajdenko<sup>1\*</sup>**

<sup>1</sup> Department of Organic Chemistry, M.V. Lomonosov Moscow State University, E-mail: [lemport@org.chem.msu.ru](mailto:lemport@org.chem.msu.ru)

<sup>2</sup> Department of Materials Science, Lomonosov Moscow State University, Leninskie gory 1 bld. 73, Moscow 119991, Russia

<sup>3</sup> A.N. Nesmeyanov Institute of Organoelement Compounds of Russian Academy of Sciences

<sup>4</sup> D.I. Mendeleev University of Chemical Technology of Russia

<sup>†</sup> These authors contributed equally

### Table of contents

|                                                           |          |
|-----------------------------------------------------------|----------|
| 1. Experimental part.....                                 | S2-S6    |
| 1.1 Materials.....                                        | S2       |
| 1.2 Methods.....                                          | S2       |
| 1.3 Solvent extraction experiments.....                   | S3       |
| 1.4 Synthesis and analytical data.....                    | S4       |
| 2. NMR, IR and HRMS spectra of synthesized compounds..... | S6-S38   |
| 3. X-ray analysis data.....                               | S39      |
| 4. Spectrophotometric titration data.....                 | S40-S43  |
| 5. Solvent extraction kinetics and Solvation numbers..... | S44      |
| 6. Theoretical computations.....                          | S45-S250 |
| References.....                                           | S251     |

## 1. Experimental part

### 1.1 Materials

Ar-saturated solvents, purified and dried using standard techniques were used<sup>1</sup>.

Lanthanides nitrates  $\text{La}(\text{NO}_3)_3 \cdot 6\text{H}_2\text{O}$ ,  $\text{Nd}(\text{NO}_3)_3 \cdot 6\text{H}_2\text{O}$ ,  $\text{Eu}(\text{NO}_3)_3 \cdot 6\text{H}_2\text{O}$ ,  $\text{Lu}(\text{NO}_3)_3 \cdot x\text{H}_2\text{O}$  and ( $\pm$ )-2-methylpyrrolidine were purchased from Sigma and used without further purification. Water content  $x$  in lutetium nitrate was determined as  $x = 3$ . Deuterated solvents for NMR spectra were purchased from commercial sources and used without further purification. Triethylamine was purified by simple distillation, previously held for 12 hours over sodium hydroxide. 3-Nitrobenzotrifluoride (“F-3”) analytical grade was purchased from Rhodia (France) and was used as a solvent in the extraction experiments without further purification.

Dichlorides of 1,10-phenanthroline-2,9-dicarboxylic acids for synthesis of ligands **L3** and **L4** may be prepared according to knowing procedures.<sup>2</sup>

Syntheses of ligands **L1** and **L2** were reported earlier.<sup>2,3</sup>

### 1.2 Methods

All syntheses were performed in argon inert atmosphere.

NMR spectra were recorded using standard 5 mm sample tubes on Agilent 400-MR spectrometer with operating frequencies of 400.1 MHz (<sup>1</sup>H) and 100.6 MHz (<sup>13</sup>C).

IR spectra were recorded on FTIR spectrometer Nicolet iS5 (Thermo Scientific) using an internal reflectance attachment with diamond optical element – attenuated total reflection (ATR) with 45° angle of incidence. Resolution 4 cm<sup>-1</sup>, the number of scans is 32.

HRMS ESI - mass spectra were recorded on the MicroTof Bruker Daltonics and Orbitrap Elite instruments.

Single crystals of **L1**, **L3** and **L4** were obtained upon slow isothermal (25°C) recrystallization of corresponding substances from acetonitrile-dichloromethane (50/50) mixture.

X-ray diffraction data for **L1**, **L3** and **L4** were collected at 120 K with a Bruker APEXII DUO CCD diffractometer; those for **L3**\* $\text{Nd}(\text{NO}_3)_3$  and **L4**\* $\text{Nd}(\text{NO}_3)_3$ , at 100 K with a Bruker D8 Quest CMOS diffractometer, both using graphite monochromated Mo-K $\alpha$  radiation ( $\lambda = 0.71073$  Å). Using Olex2<sup>4</sup>, the structures were solved with the ShelXT<sup>5</sup> structure solution program using Intrinsic Phasing and refined with the XL<sup>6</sup> refinement package using Least-Squares minimization against  $F^2$  in anisotropic approximation for non-hydrogen atoms. Positions of hydrogen atoms were calculated, and they were refined in isotropic approximation within the riding model. Crystal data and structure refinement parameters for **L1**, **L3**, **L4**, **L3**\* $\text{Nd}(\text{NO}_3)_3$  and **L4**\* $\text{Nd}(\text{NO}_3)_3$  are given in Table S1. CCDC 2076146 (for **L1**), 2072998 (for **L3**), 2072997 (for **L4**), 2164120 (for

**L3\***Nd(NO<sub>3</sub>)<sub>3</sub>) and 2164121 (for **L4\***Nd(NO<sub>3</sub>)<sub>3</sub>) contain the supplementary crystallographic data for this paper.

Detailed crystallographic data provided here in Chapter 3.

UV–VIS spectra were recorded at the temperature  $25.0 \pm 0.1$  °C in the wavelength region of 200–400 nm (0.5 nm interval) on a Shimadzu UV 1800 spectrophotometer controlled by LabSolutions UV-Vis software with thermostatic attachment (Shimadzu TCC-100) using quartz cuvettes with an optical path length of 10 mm. A stock solution of the ligand was prepared (ca.  $10^{-4}$  mol/L) by dissolving respective ligand in CH<sub>3</sub>CN, and then a working ligand solution (ca.  $10^{-5}$  mol/L) was prepared from the initial solution. A working titrant solution ( $10^{-3}$  mol/L) was prepared by dissolving respective lanthanide (III) nitrate hydrate Ln(NO<sub>3</sub>)<sub>3</sub>·6H<sub>2</sub>O (Ln = La, Nd, Eu, Lu) in CH<sub>3</sub>CN. Acetonitrile (CH<sub>3</sub>CN; 99.95%, HPLC grade, Panreac AppliChem) was dried over molecular sieves (zeolite KA, 3 Å, balls, diameter 1.6–2.5 mm, production HKC Corp., Hong Kong) prior to use. The titration was carried out by adding 2 µl aliquots of the working metal cation solution to 2 mL of the working ligand solution in the titration cell. The titration continued until no obvious change was observed in the spectra. The stability constants of the Ln(III) complexes were calculated using the HypSpec2014 program.

### 1.3 Solvent extraction experiments

For solvent extraction experiments 0.5 mL of organic solution of the ligand in “F-3” and 0.5 mL of aqueous phase containing nitric acid and radionuclides or lanthanides were treated with a vortex shaker for 30 minutes in 1.5 mL polypropylene vial at temperature  $25 \pm 1$  °C. Then samples were centrifuged (5 minutes, 6000 rpm) and aliquots of each phase were taken for determination of radionuclide or lanthanide concentration. Content of <sup>241</sup>Am ( $E_{\gamma} = 59.5$  keV) and <sup>152</sup>Eu ( $E_{\gamma} = 121.8$  keV) was determined by gamma-spectrometry using a high-pure germanium detector GR 3818 (Canberra Ind.). The distribution coefficients were calculated as the ratio of count rates for the corresponding organic and aqueous phases, and separation factors were calculated as the ratio of distribution coefficients for the two elements. Content of <sup>241</sup>Am ( $E_{\alpha} = 5637$  keV) and <sup>244</sup>Cm ( $E_{\alpha} = 5901$  keV) was determined by alpha spectrometer Model 7401 with Si detectors (Canberra Ind.). The content of lanthanides in the initial aqueous phase and in the equilibrium aqueous phase after extraction was determined by ICP-OES (Agilent ICP-OES 720). For <sup>244</sup>Cm and lanthanides the activity/concentration in the organic phase was calculated as the difference between the concentrations in the initial and equilibrium aqueous phases. All extraction experiments were repeated three times. Errors for  $0.01 < D < 100$  are within 10%.

## 1.4 Synthesis and analytical data

### *General method for synthesis of diamides*

A solution of ( $\pm$ )-2-methylpyrrolidine (12.5 mmol) and 1.74 ml of triethylamine (12.5 mmol) in 10 ml of methylene chloride was added at  $-10^{\circ}\text{C}$  under vigorous stirring to a suspension of 5 mmol of the corresponding chloride in 50 ml of methylene chloride. Then the reaction mixture was allowed to reach room temperature followed by refluxing for 4 hours. Next, the reaction mixture was diluted with 50 ml of methylene chloride, washed with water ( $2 \times 50$  ml), dried over sodium sulfate, and the solvent was distilled off. The residue was purified by recrystallization from a mixture of hexane/ethyl acetate or by silica gel column chromatography (eluent: hexane/acetone = 7/3), obtaining the desired product in the form of a white or slightly colored solid.

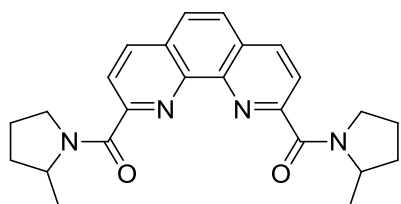

**(2-methylpyrrolidin-1-yl)(9-((2-methylpyrrolidin-1-yl)carbonyl)-1,10-phenanthrolin-2-yl)methanone (MePyrrDAPhen).** Yield 57% (1.15 g), yellowish powder, m.p.  $211\text{-}214^{\circ}\text{C}$ , Rf 0.24 (acetone:hexane 1:2);  $^1\text{H}$  NMR (400 MHz,  $\text{CDCl}_3$ )  $\delta$  8.39-7.80 (group of m, 6H, phenanthroline CH), 5.68-5.17 (group of m, 1H, pyrrolidine ring CH), 4.55-3.65 (group of m, 4H, pyrrolidine ring  $\text{CH}_2$  + 1H, pyrrolidine ring CH), 2.33-1.60 (groups of m, 8H, pyrrolidine ring  $\text{CH}_2$ ), 1.47-0.81 (groups of m, 6H,  $\text{CH}_3$ );  $^{13}\text{C}$  NMR (101 MHz,  $\text{CDCl}_3$ )  $\delta$  166.4-165.9 (group of CO), 154.7-154.0, 144.8-144.4, 137.2-136.9, 129.4-129.2, 127.5-127.4, 123.7-123.2 (groups of phenanthroline carbons), 54.6-53.9 (group of pyrrolidine ring CH carbons), 49.6-49.3, 47.3-46.9, 34.2-33.8, 32.3-32.1, 25.2-24.8, 22.0-21.7 (groups of pyrrolidine ring  $\text{CH}_2$  and  $\text{CH}_3$  carbons), 19.7-19.5 (group of  $\text{CH}_3$  carbons); IR ( $\nu$ ,  $\text{cm}^{-1}$ ) 3066, 3037, 2965, 2896, 2868 (C-H stretching vibrations), 1616 (C=O), 1546, 1505, 1455, 1418, 1398 (C=C, C=N); HRMS (ESI-TOF) (m/z)  $[\text{M}+\text{H}]^+$  calculated for  $\text{C}_{24}\text{H}_{27}\text{N}_4\text{O}_2$  403.2129, found 403.2130.

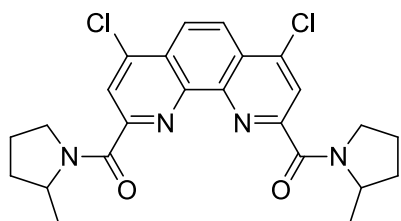

**(4,7-Dichloro-9-((2-methylpyrrolidin-1-yl)carbonyl)-1,10-phenanthrolin-2-yl)(2-methylpyrrolidin-1-yl)methanone (MePyrrDAPhenCl).** Yield 60% (1.41 g), yellowish powder, m.p.  $225\text{-}227^{\circ}\text{C}$ , Rf 0.67 (acetone:hexane 1:2);  $^1\text{H}$  NMR (400 MHz,  $\text{CDCl}_3$ )  $\delta$  8.43-8.22 (m, 4H,

phenanthroline CH), 5.65-5.20 (group of m, 2H, pyrrolidine ring CH), 4.55-1.60 (groups of m, 12H, pyrrolidine ring CH<sub>2</sub>), 1.46-0.87 (groups of m, 6H, CH<sub>3</sub>); <sup>13</sup>C NMR (101 MHz, CDCl<sub>3</sub>) δ 165.2-164.4 (group of CO), 154.9-154.1, 144.8-144.3, 145.4-145.3, 143.9-143.7, 127.6-127.4, 124.5-124.1 (groups of phenanthroline carbons), 54.8-54.1 (group of pyrrolidine ring CH), 49.6-49.4, 47.5-47.2, 34.1-33.8, 32.3-32.1, 25.1-24.9 (groups of pyrrolidine ring CH<sub>2</sub>), 22.0-21.7 (groups of CH<sub>3</sub> and pyrrolidine ring CH<sub>2</sub>), 19.7-19.5 (group of CH<sub>3</sub>); IR (ν, cm<sup>-1</sup>) 3071, 3042, 2966, 2880 (C-H stretching vibrations), 1622 (C=O), 1570, 1529, 1455, 1448, 1415 (C=C, C=N); HRMS (ESI-TOF) (m/z) [M+H]<sup>+</sup> calculated for C<sub>24</sub>H<sub>25</sub>Cl<sub>2</sub>N<sub>4</sub>O<sub>2</sub> 471.1349, found 471.1343.

*General method for synthesis of complexes*

A solution of 0.1 mmol of lanthanide nitrate in 1 ml of dry acetonitrile was added dropwise to a solution of 0.1 mmol of ligand in 1 ml of chloroform. After that the reaction mixture was concentrated *in vacuo* (~20 Torr) to 1/5 of the initial volume and treated with 2 ml of diethyl ether. The resulting precipitate of the complex was filtered, washed with a fresh portion of ether, dried in air, then at 80°C at ~2 Torr.

**Complex L3\*La(NO<sub>3</sub>)<sub>3</sub>.** Yield 66.8 mg (91.8%). Gray-yellow powder. T<sub>decomp.</sub> 193°C. IR (ν, cm<sup>-1</sup>) 1597(CO), 1456, 1313 (ONO<sub>2</sub>).

**Complex L3\*Nd(NO<sub>3</sub>)<sub>3</sub>.** Yield 68.7 mg (93.8%). Gray-green powder. T<sub>decomp.</sub> 199°C. IR (ν, cm<sup>-1</sup>) 1595(CO), 1464, 1301 (ONO<sub>2</sub>).

**Complex L3\*Eu(NO<sub>3</sub>)<sub>3</sub>.** Yield 72 mg (96 %). White powder. T<sub>decomp.</sub> 325°C. IR (ν, cm<sup>-1</sup>) 1597 (CO), 1470, 1300 (ONO<sub>2</sub>).

**Complex L3\*Lu(NO<sub>3</sub>)<sub>3</sub>.** Yield 71.5 mg (93.7%). Gray-yellow powder. T<sub>decomp.</sub> 184°C. IR (ν, cm<sup>-1</sup>) 1600(CO), 1465, 1301 (ONO<sub>2</sub>).

**Complex L4\*La(NO<sub>3</sub>)<sub>3</sub>** Yield 74.4 mg (93.5%). Light yellow powder. T<sub>decomp.</sub> 227°C. IR (ν, cm<sup>-1</sup>) 1601(CO), 1464, 1301 (ONO<sub>2</sub>).

**Complex L4\*Nd(NO<sub>3</sub>)<sub>3</sub>** Yield 77.8 mg (97%). Light yellow powder. T<sub>decomp.</sub> 235°C. IR (ν, cm<sup>-1</sup>) 1599(CO), 1460, 1303 (ONO<sub>2</sub>).

**Complex L4\*Eu(NO<sub>3</sub>)<sub>3</sub>** Yield 78.5 mg (96.8%). Light yellow powder. T<sub>decomp.</sub> 238°C. IR (ν, cm<sup>-1</sup>) 1603(CO), 1464, 1308 (ONO<sub>2</sub>).

**Complex L4\*Lu(NO<sub>3</sub>)<sub>3</sub>** Yield 81.1 mg (97%). Yellow powder. T<sub>decomp.</sub> 197°C. IR (ν, cm<sup>-1</sup>) 1606 (CO), 1463, 1296 (ONO<sub>2</sub>).

## 2 NMR, IR and HRMS spectra of synthesized compounds

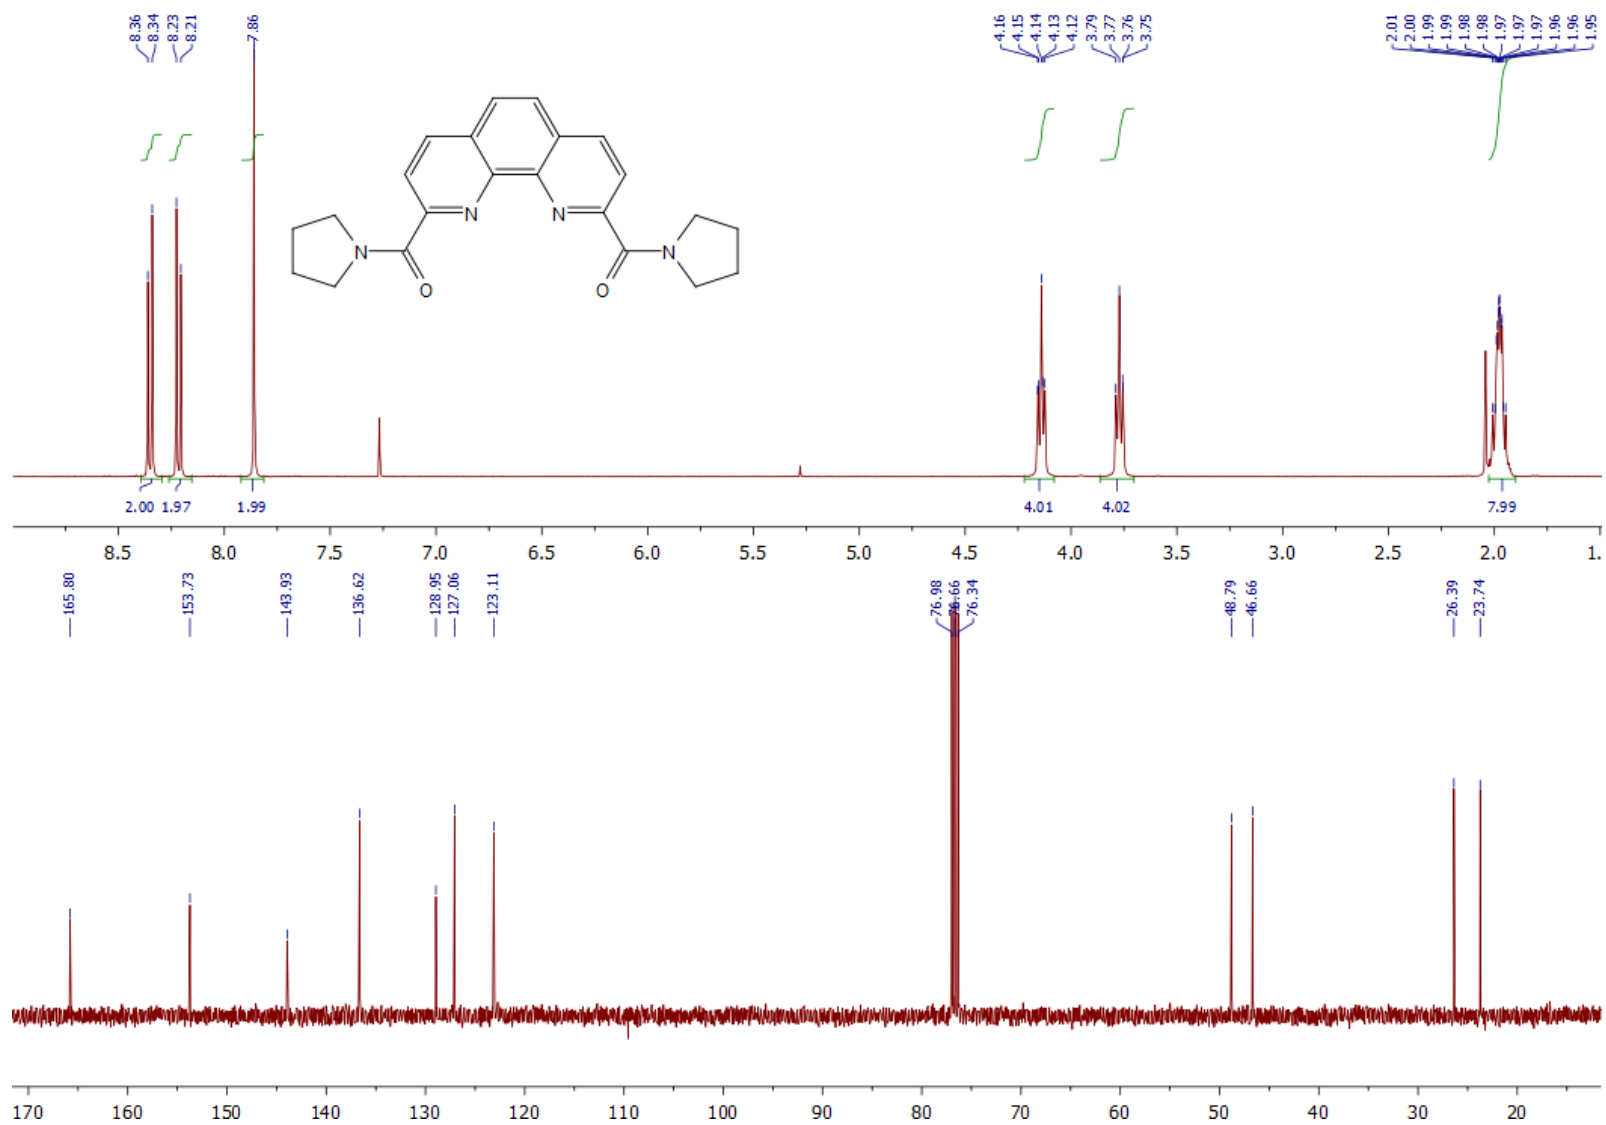

Figure S1.  $^1\text{H}$  NMR and  $^{13}\text{C}$  NMR spectra of L1 in  $\text{CDCl}_3$  at  $25^\circ\text{C}$

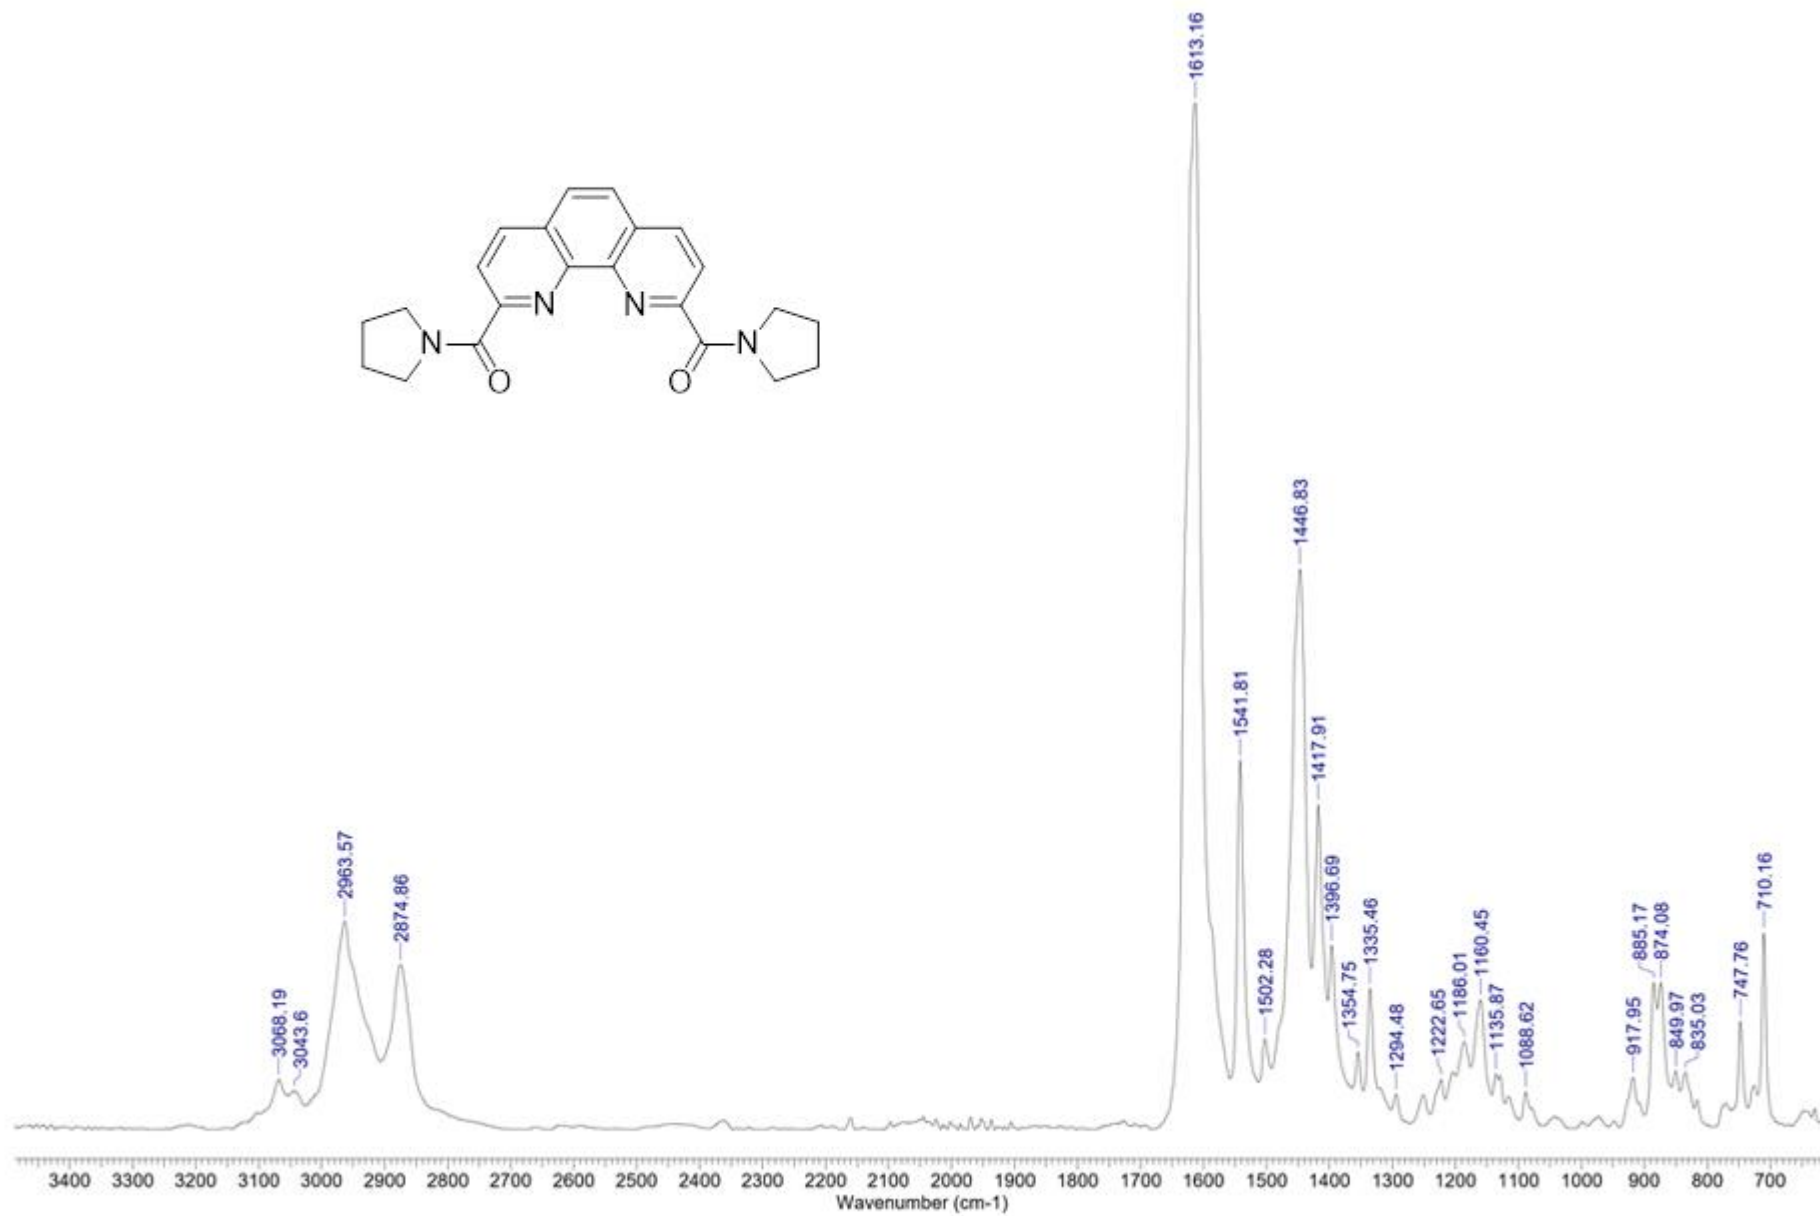

**Figure S2.** Solid-state IR spectra of L1

# Display Report

## Analysis Info

Analysis Name D:\Data\Kolotyrkina\2020\Muzalevsky\0916033.d  
Method tune\_50-1600.m  
Sample Name /MUSE PVS-066  
Comment C22H22N4O2 mH 375.1815 calibrant added CH3CN

Acquisition Date 16.09.2020 18:58:59

Operator BDAL@DE  
Instrument / Ser# micrOTOF 10248

## Acquisition Parameter

|             |            |                      |          |                  |           |
|-------------|------------|----------------------|----------|------------------|-----------|
| Source Type | ESI        | Ion Polarity         | Positive | Set Nebulizer    | 1.0 Bar   |
| Focus       | Not active |                      |          | Set Dry Heater   | 200 °C    |
| Scan Begin  | 50 m/z     | Set Capillary        | 4500 V   | Set Dry Gas      | 4.0 l/min |
| Scan End    | 1600 m/z   | Set End Plate Offset | -500 V   | Set Divert Valve | Waste     |

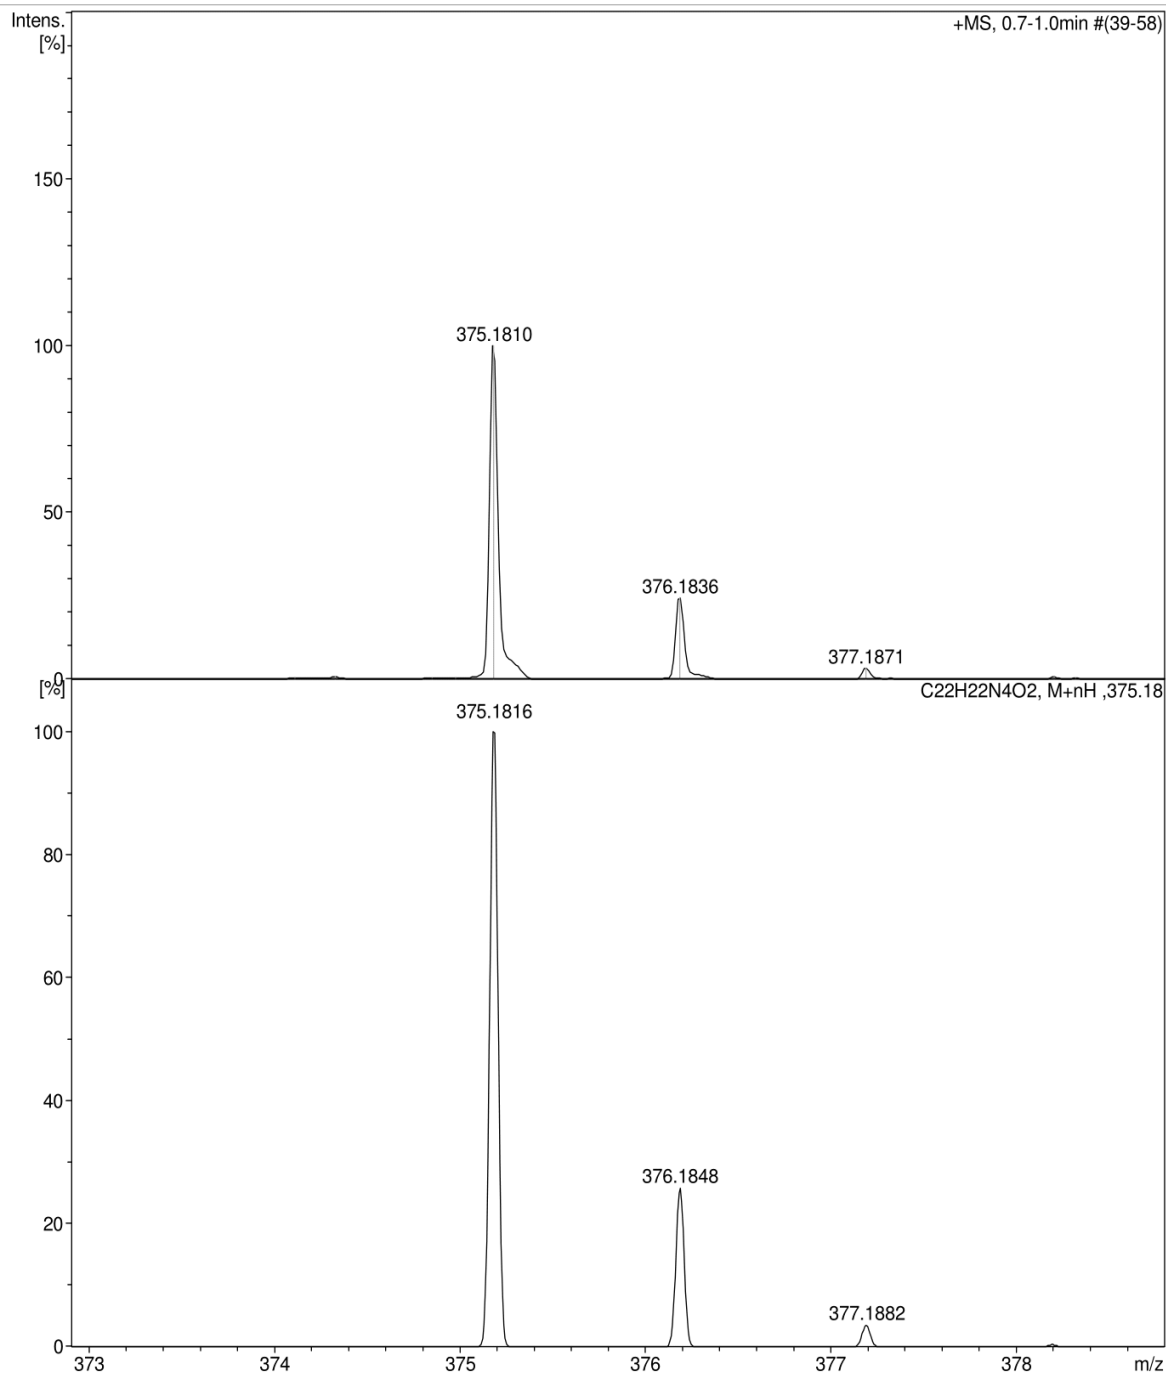

**Figure S3. HRMS spectra of L1**



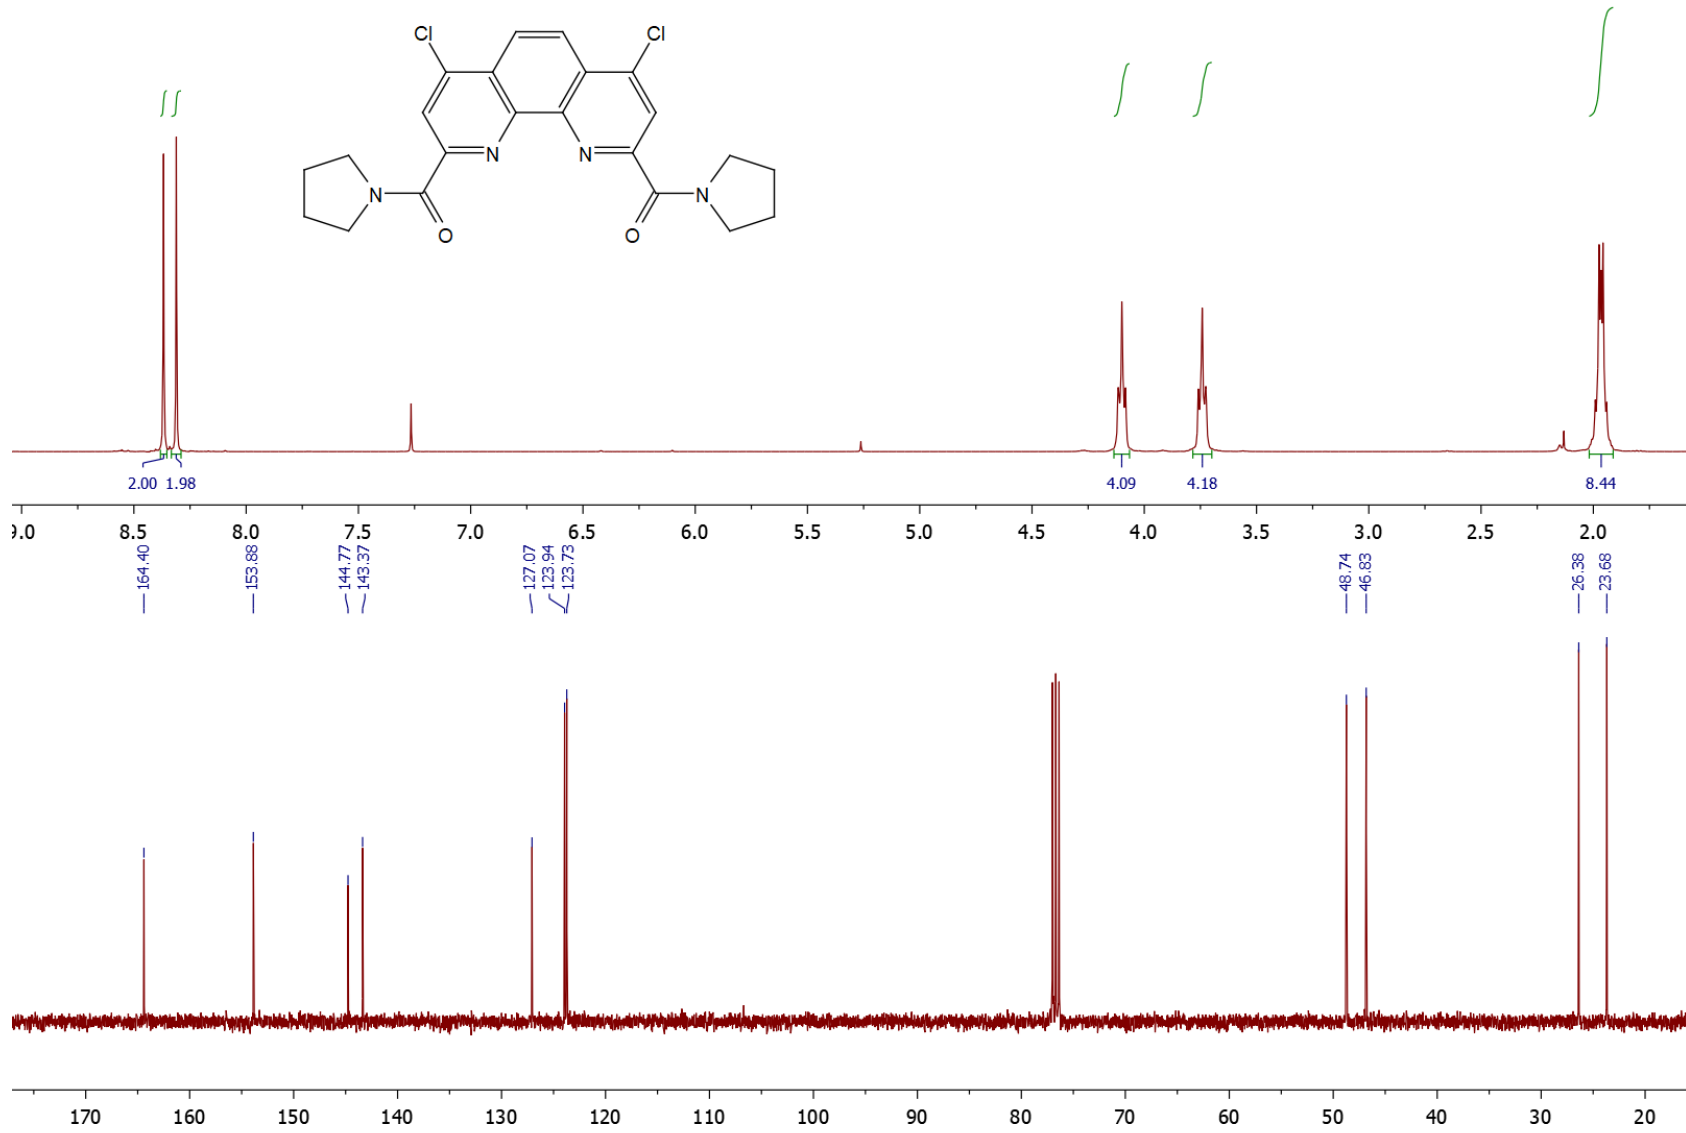

Figure S4. <sup>1</sup>H NMR and <sup>13</sup>C NMR spectra of L2 in CDCl<sub>3</sub> at 25°C

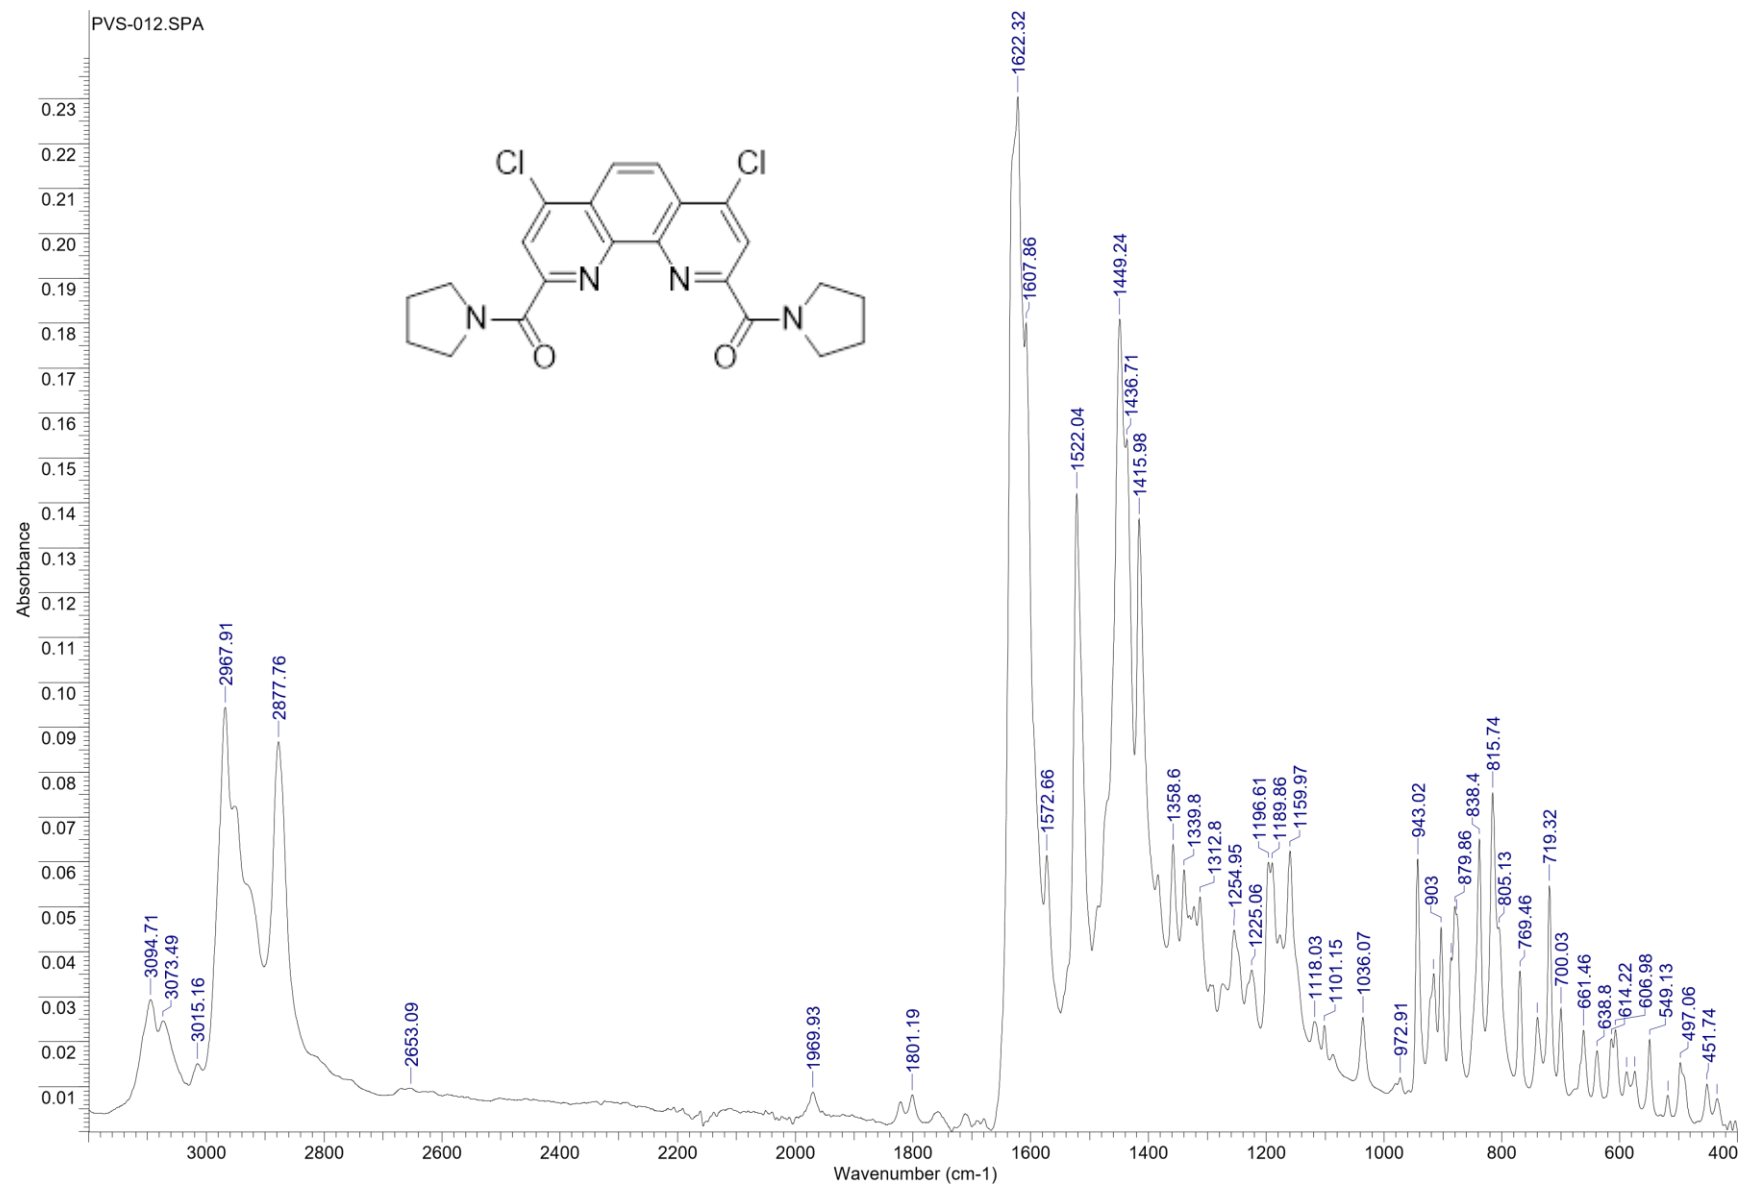

Figure S5. Solid-state IR spectra of L2

# Display Report

## Analysis Info

Analysis Name D:\Data\Kolotyrkina\2019\Muzalevskiy\0711004.d  
Method tune\_50-1600.m  
Sample Name /MUSE PVS-012  
Comment C22H20Cl2N4O2 mH 443.1036 clb added CH3CN

Acquisition Date 11.07.2019 11:55:25  
Operator BDAL@DE  
Instrument / Ser# micrOTOF 10248

## Acquisition Parameter

|             |            |                      |          |                  |           |
|-------------|------------|----------------------|----------|------------------|-----------|
| Source Type | ESI        | Ion Polarity         | Positive | Set Nebulizer    | 1.0 Bar   |
| Focus       | Not active |                      |          | Set Dry Heater   | 200 °C    |
| Scan Begin  | 50 m/z     | Set Capillary        | 4500 V   | Set Dry Gas      | 4.0 l/min |
| Scan End    | 1600 m/z   | Set End Plate Offset | -500 V   | Set Divert Valve | Waste     |

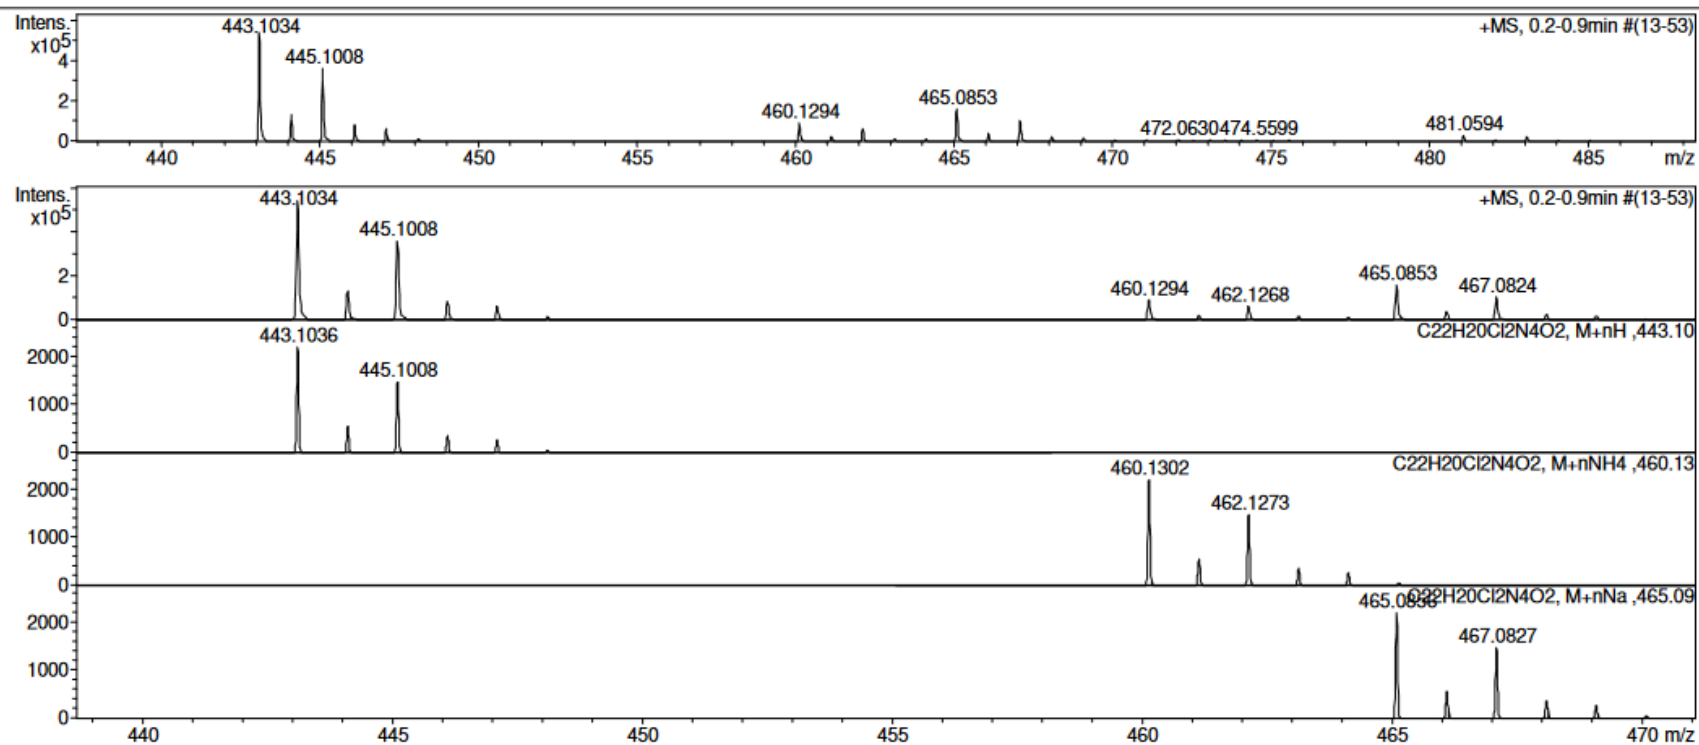

Figure S6. HRMS spectra of L2

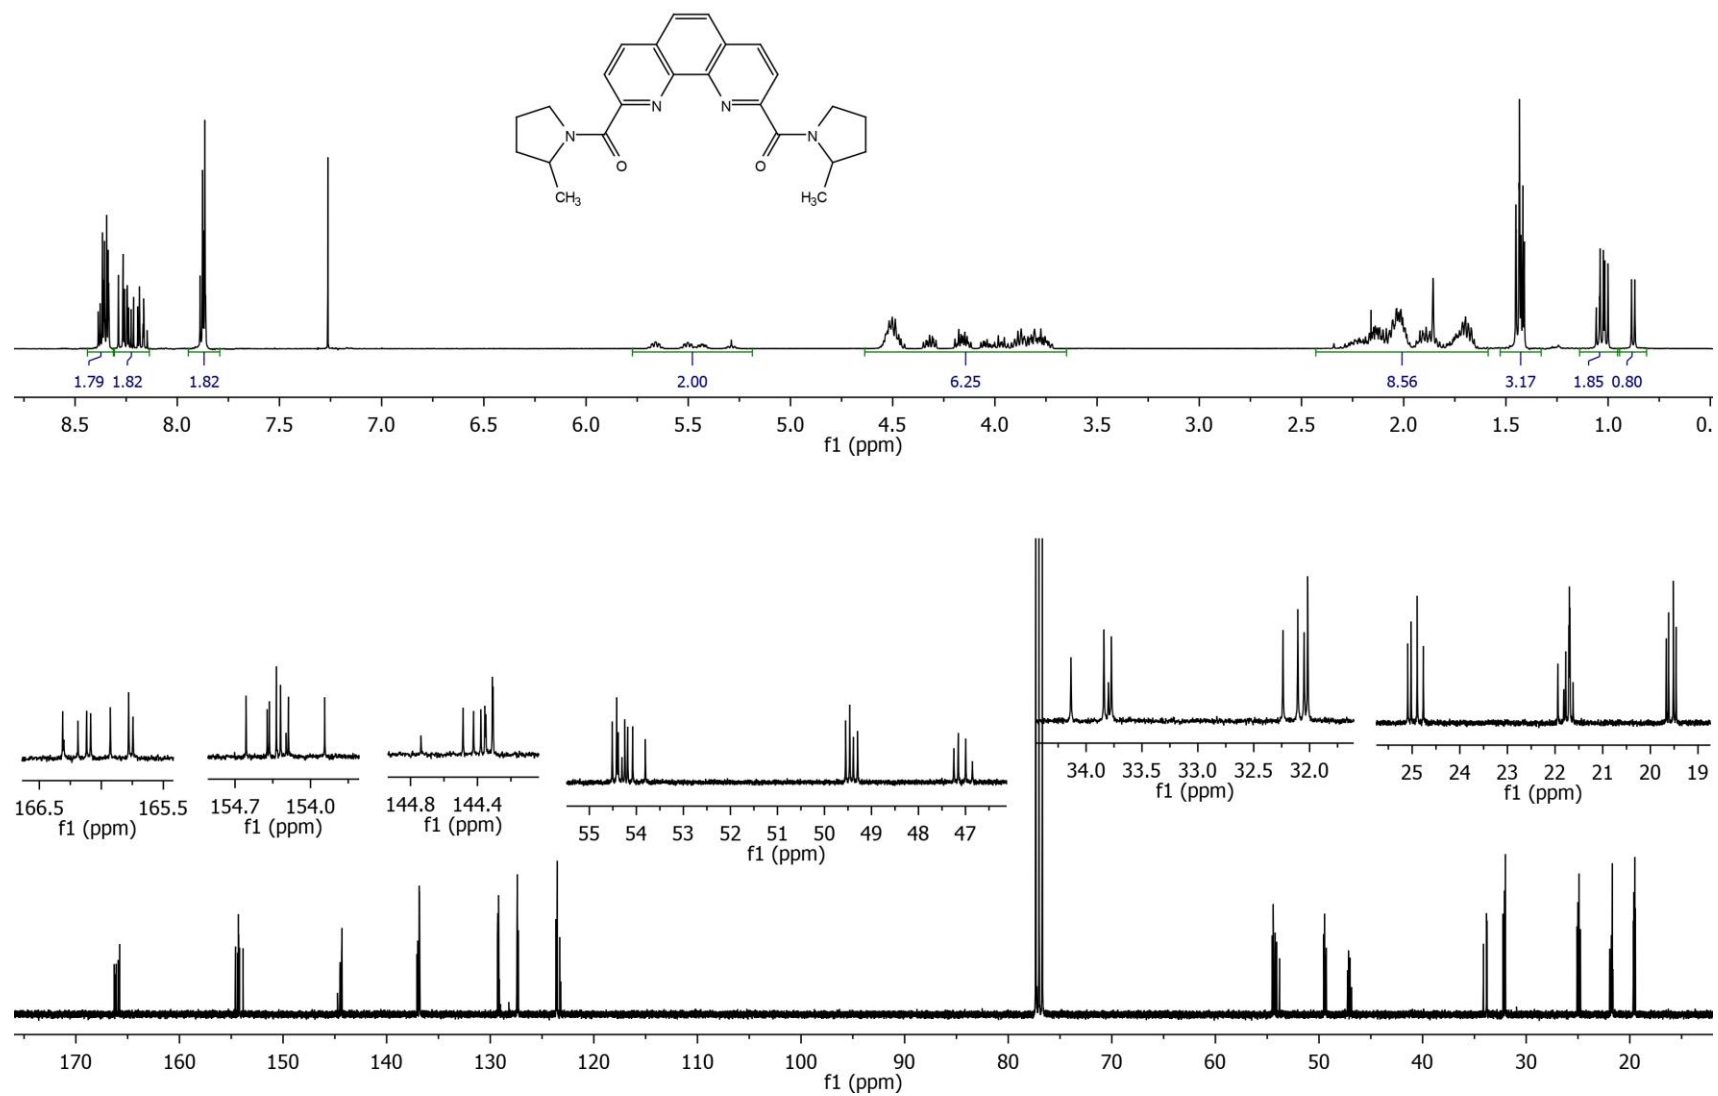

**Figure S7.**  $^1\text{H}$  NMR and  $^{13}\text{C}$  NMR spectra of L3 in  $\text{CDCl}_3$  at  $25^\circ\text{C}$

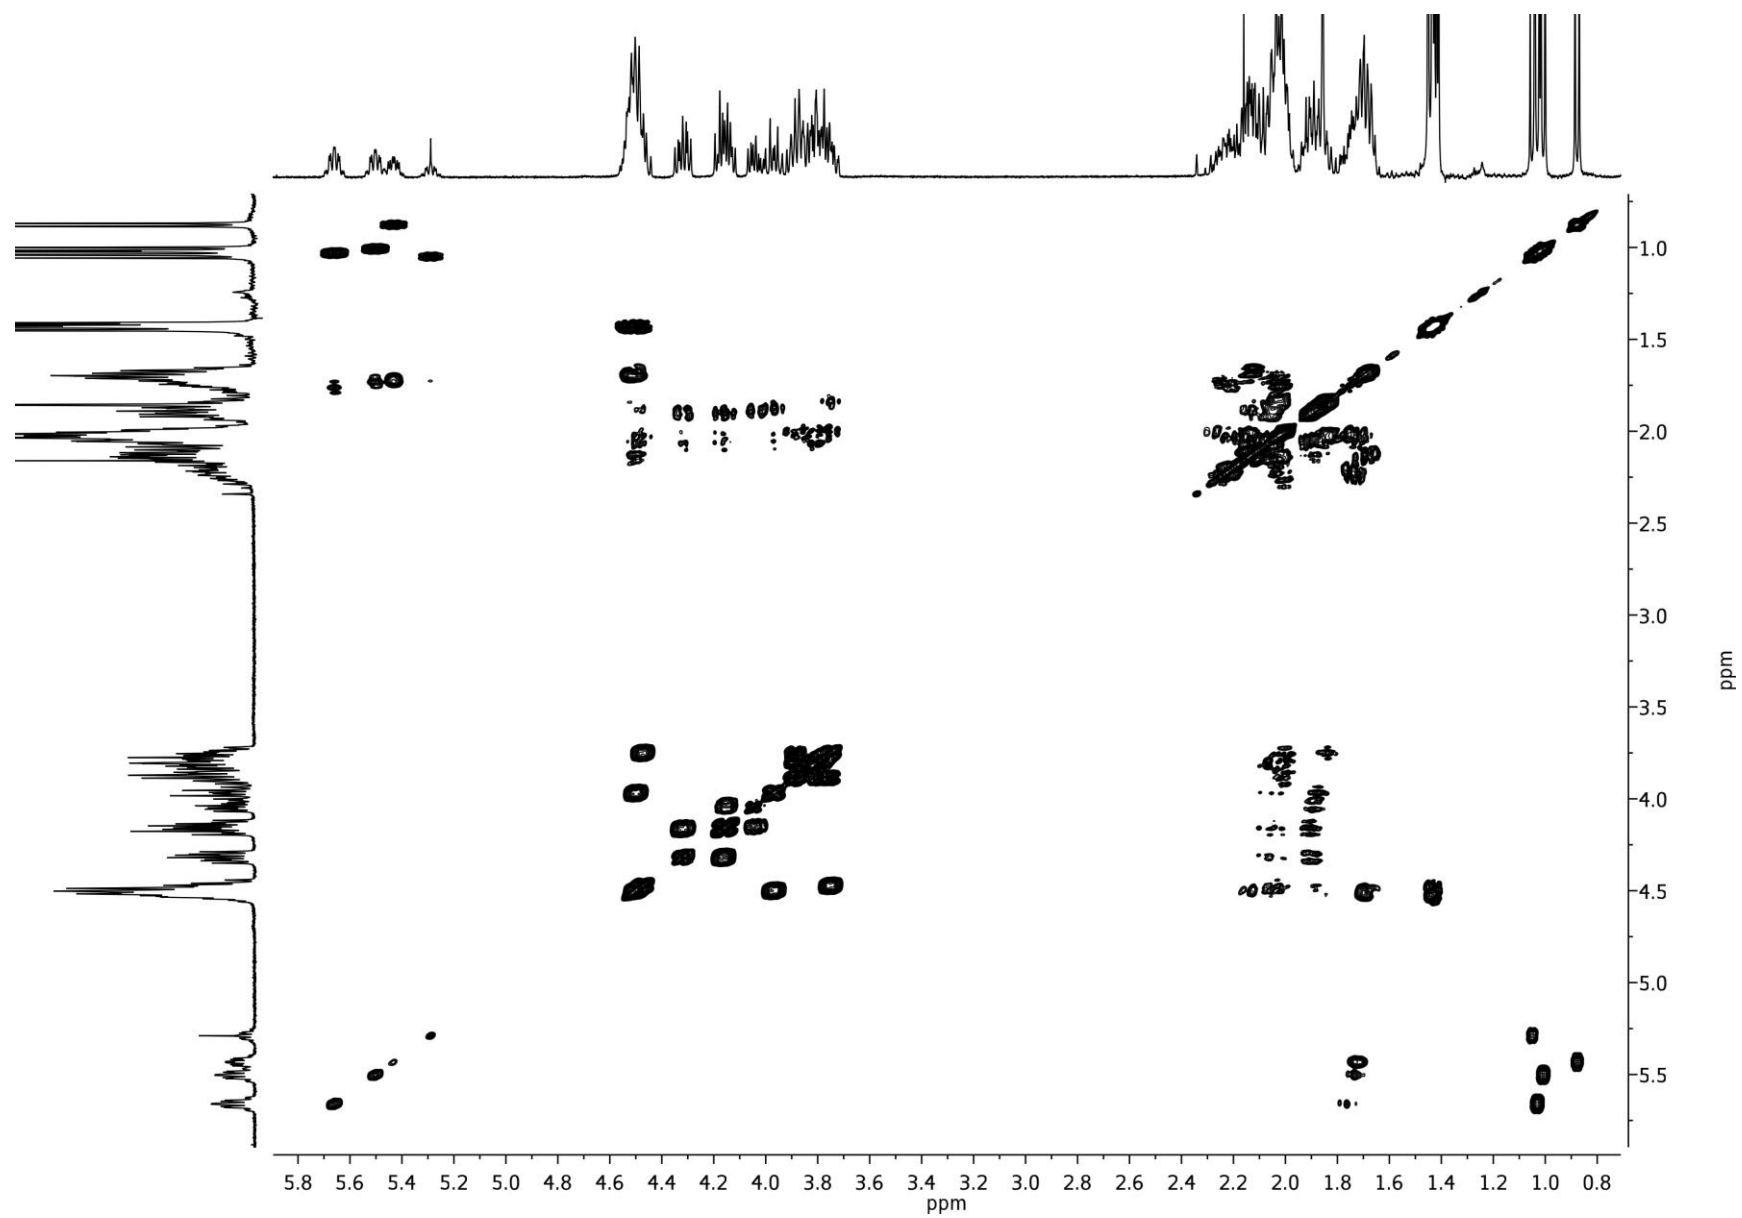

**Figure S8.** Fragmental view of <sup>1</sup>H/<sup>1</sup>H COSY spectra of L3 in CDCl<sub>3</sub> at 25°C

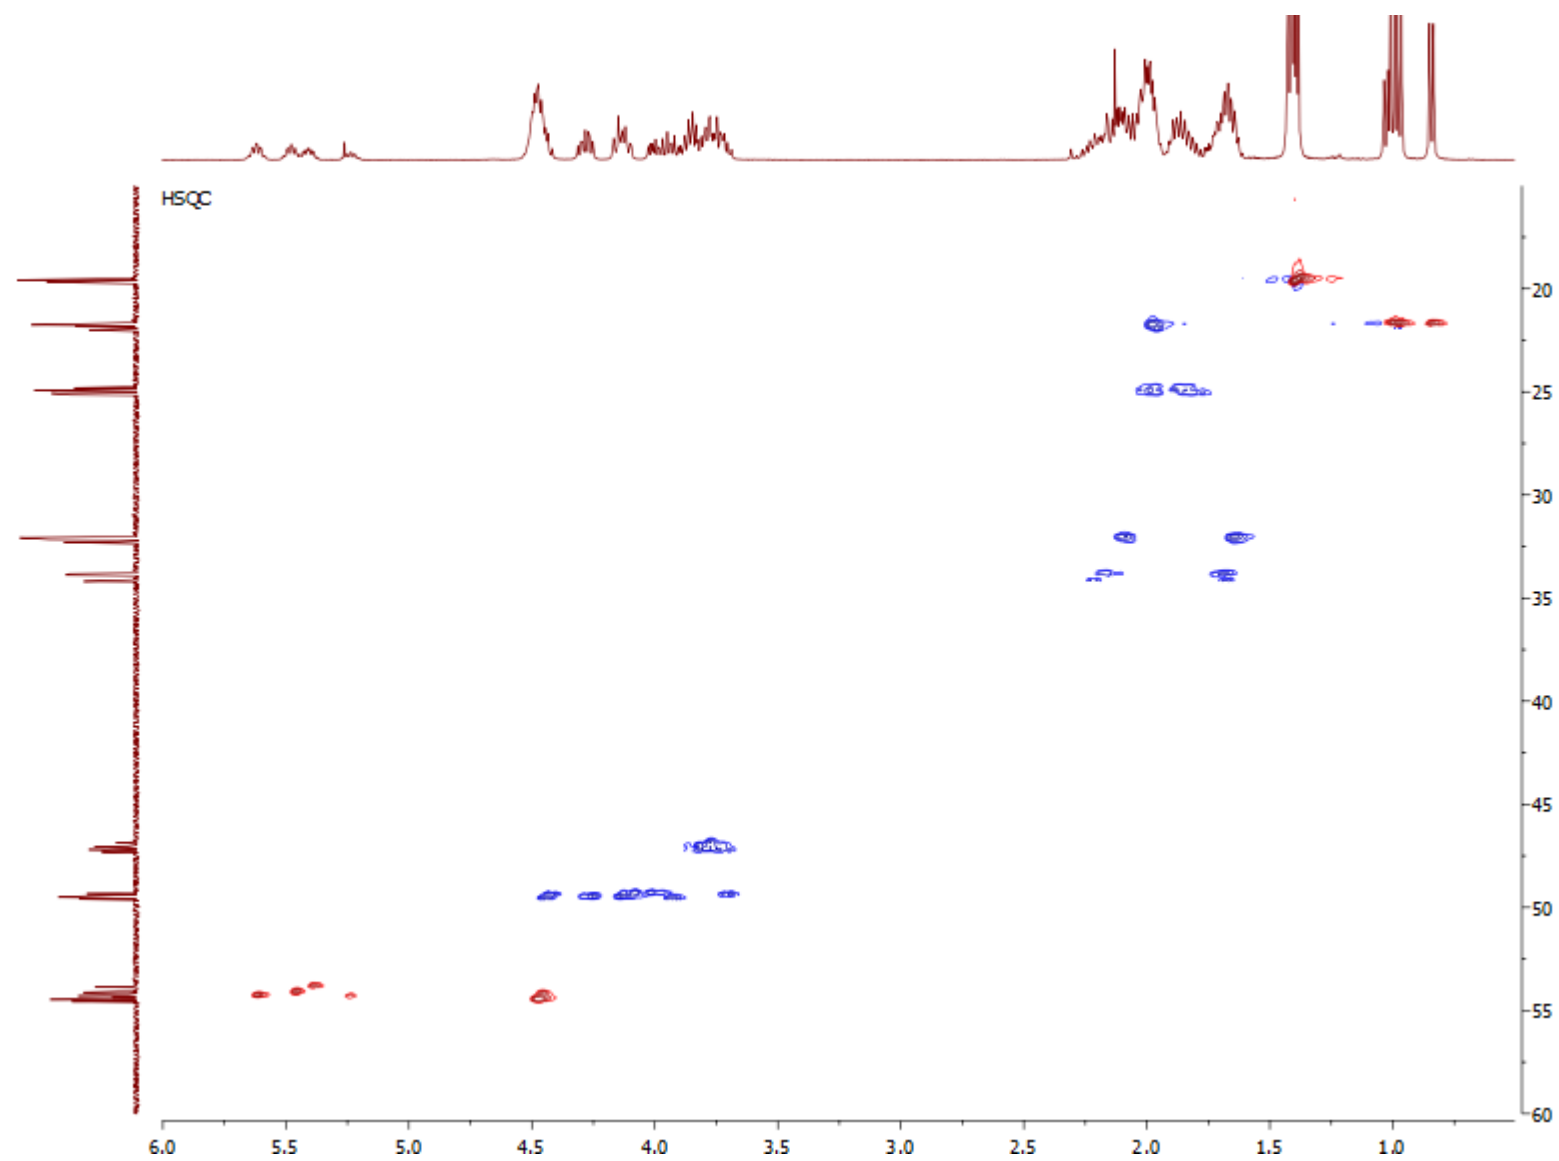

**Figure S9.** Fragmental view of  $^1\text{H}/^{13}\text{C}$  HSQC spectra of **L3** in  $\text{CDCl}_3$  at  $25^\circ\text{C}$

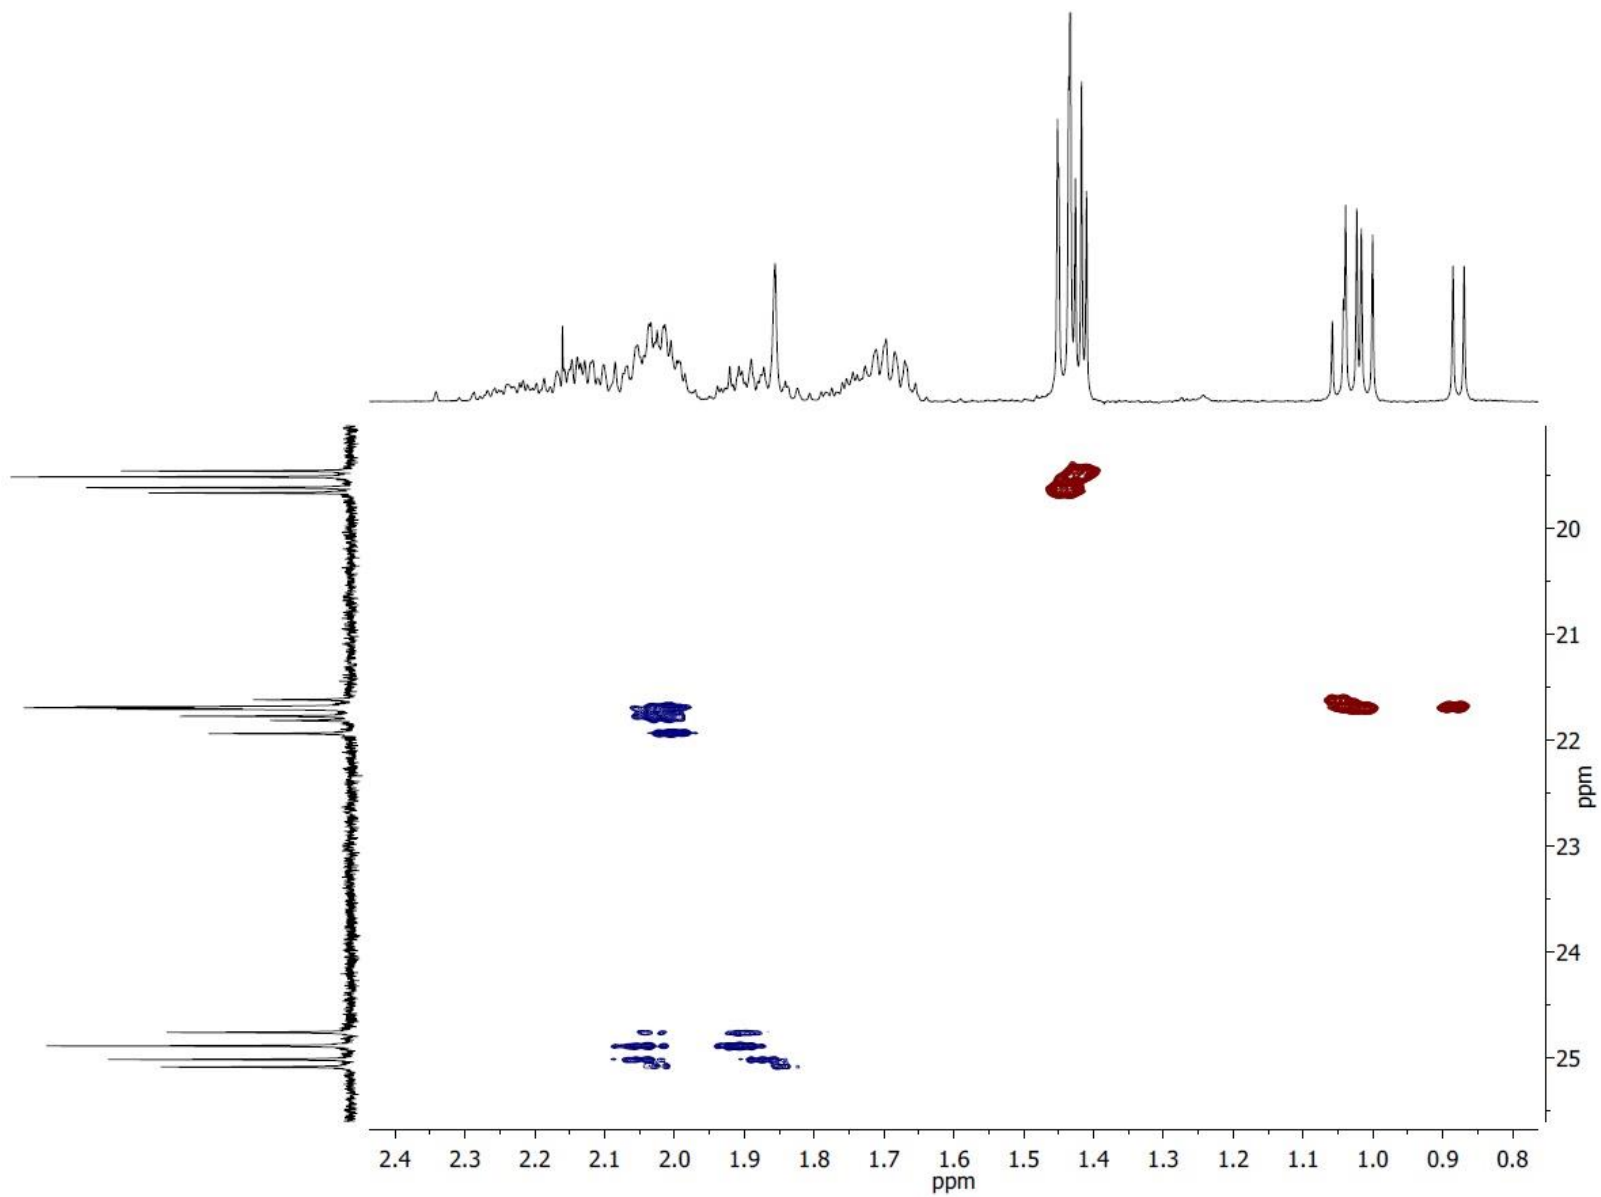

**Figure S10.** Fragmental view of  $^1\text{H}/^{13}\text{C}$  HSQC spectra of **L3** in  $\text{CDCl}_3$  at  $25^\circ\text{C}$

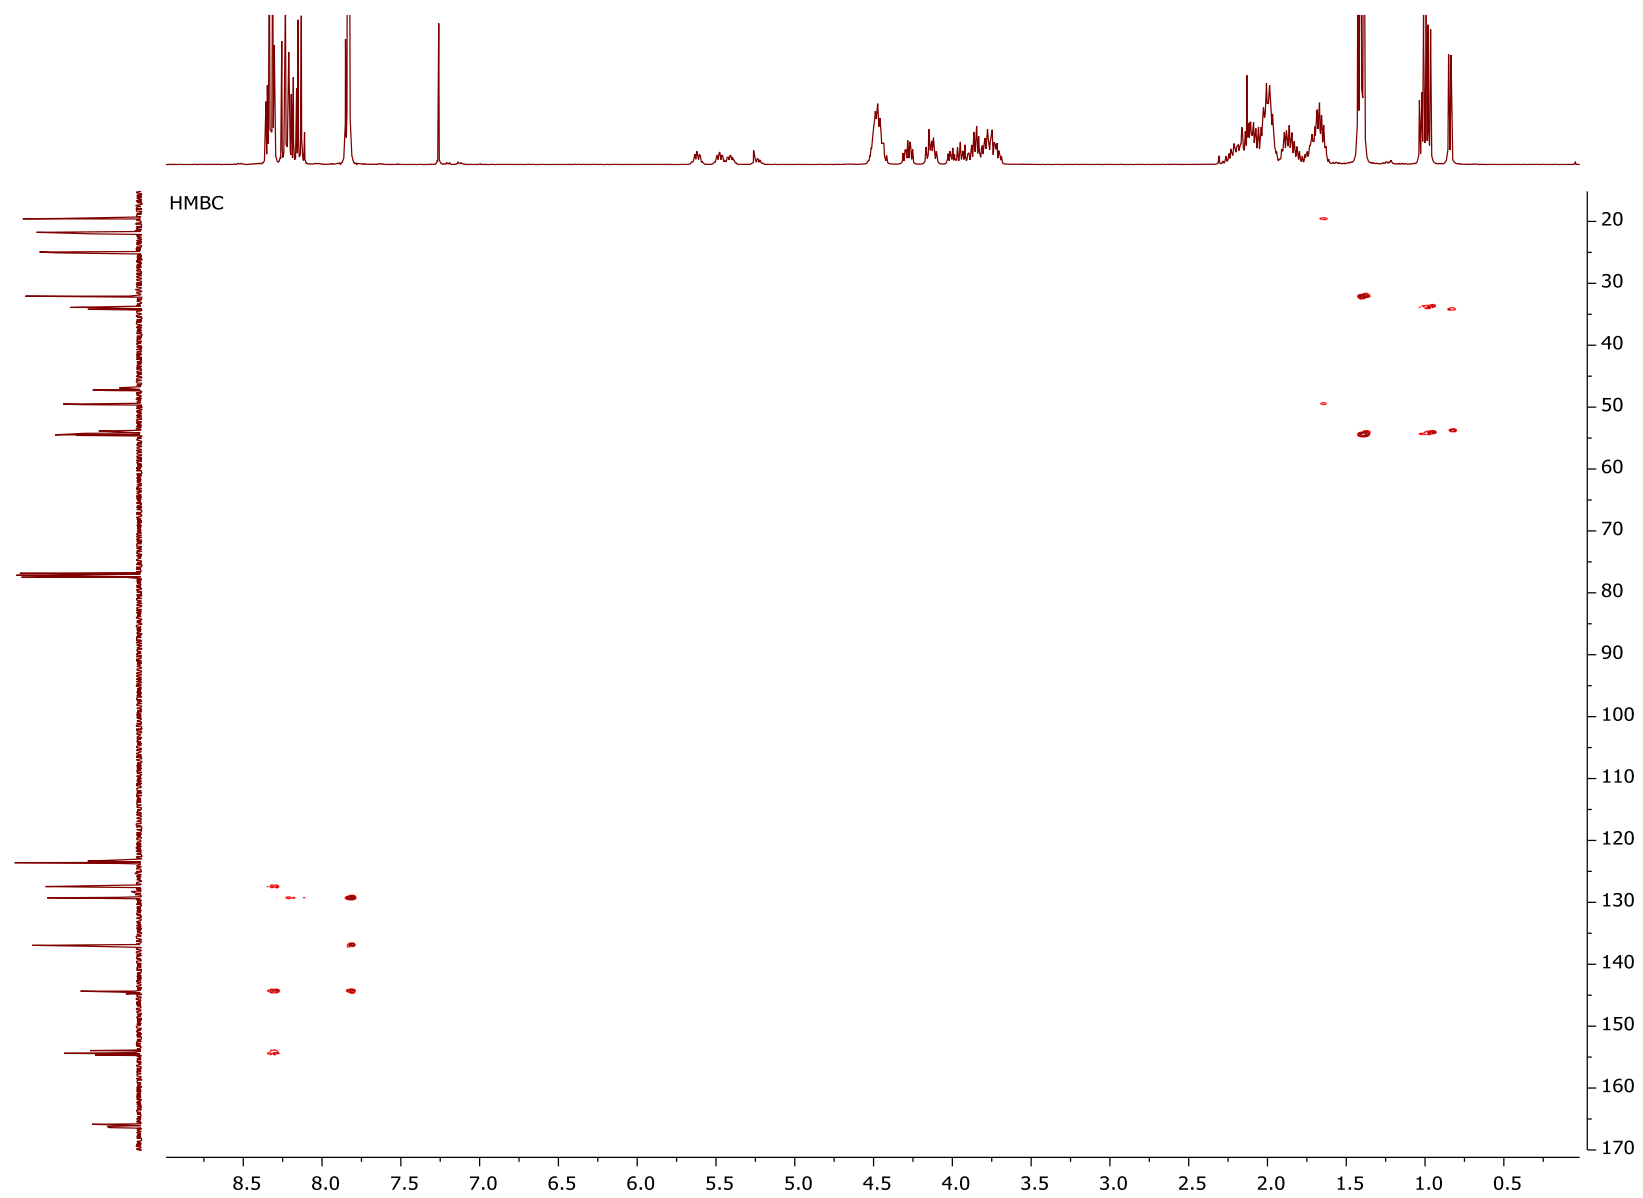

**Figure S11.**  $^1\text{H}/^{13}\text{C}$  HMBC spectra of **L3** in  $\text{CDCl}_3$  at  $25^\circ\text{C}$



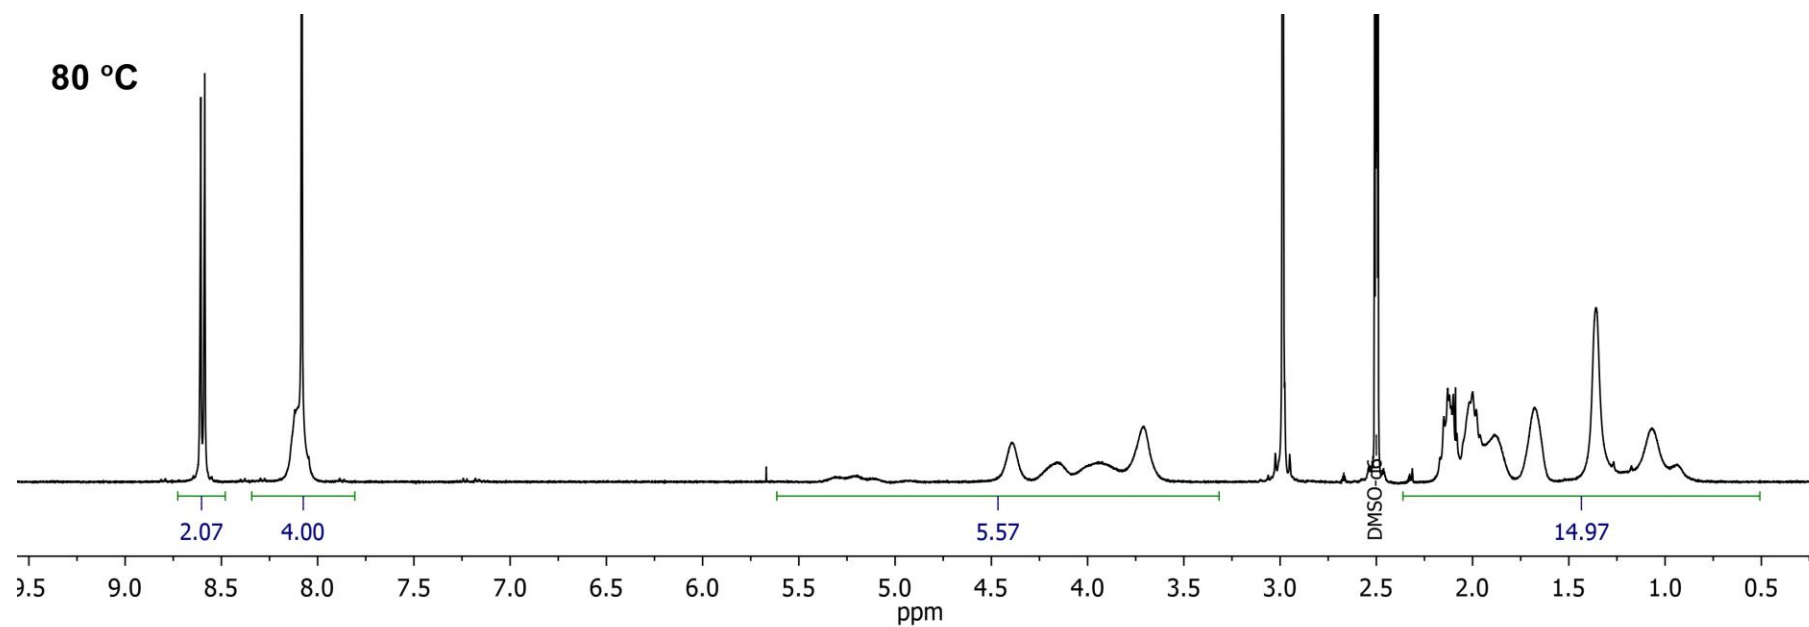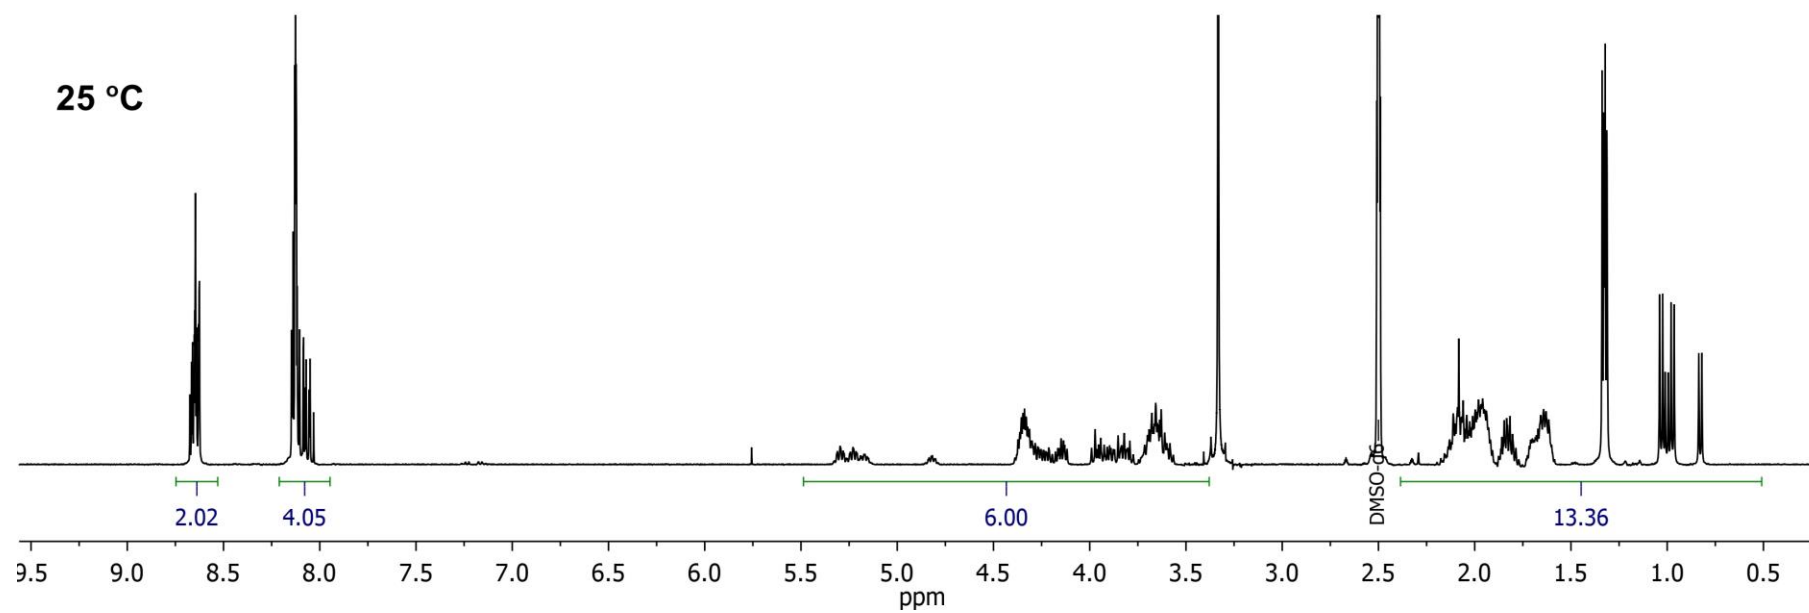

**Figure S12.**  $^1\text{H}$  NMR spectra of **L3** in  $\text{DMSO-d}_6$  at 25°C and 80°C

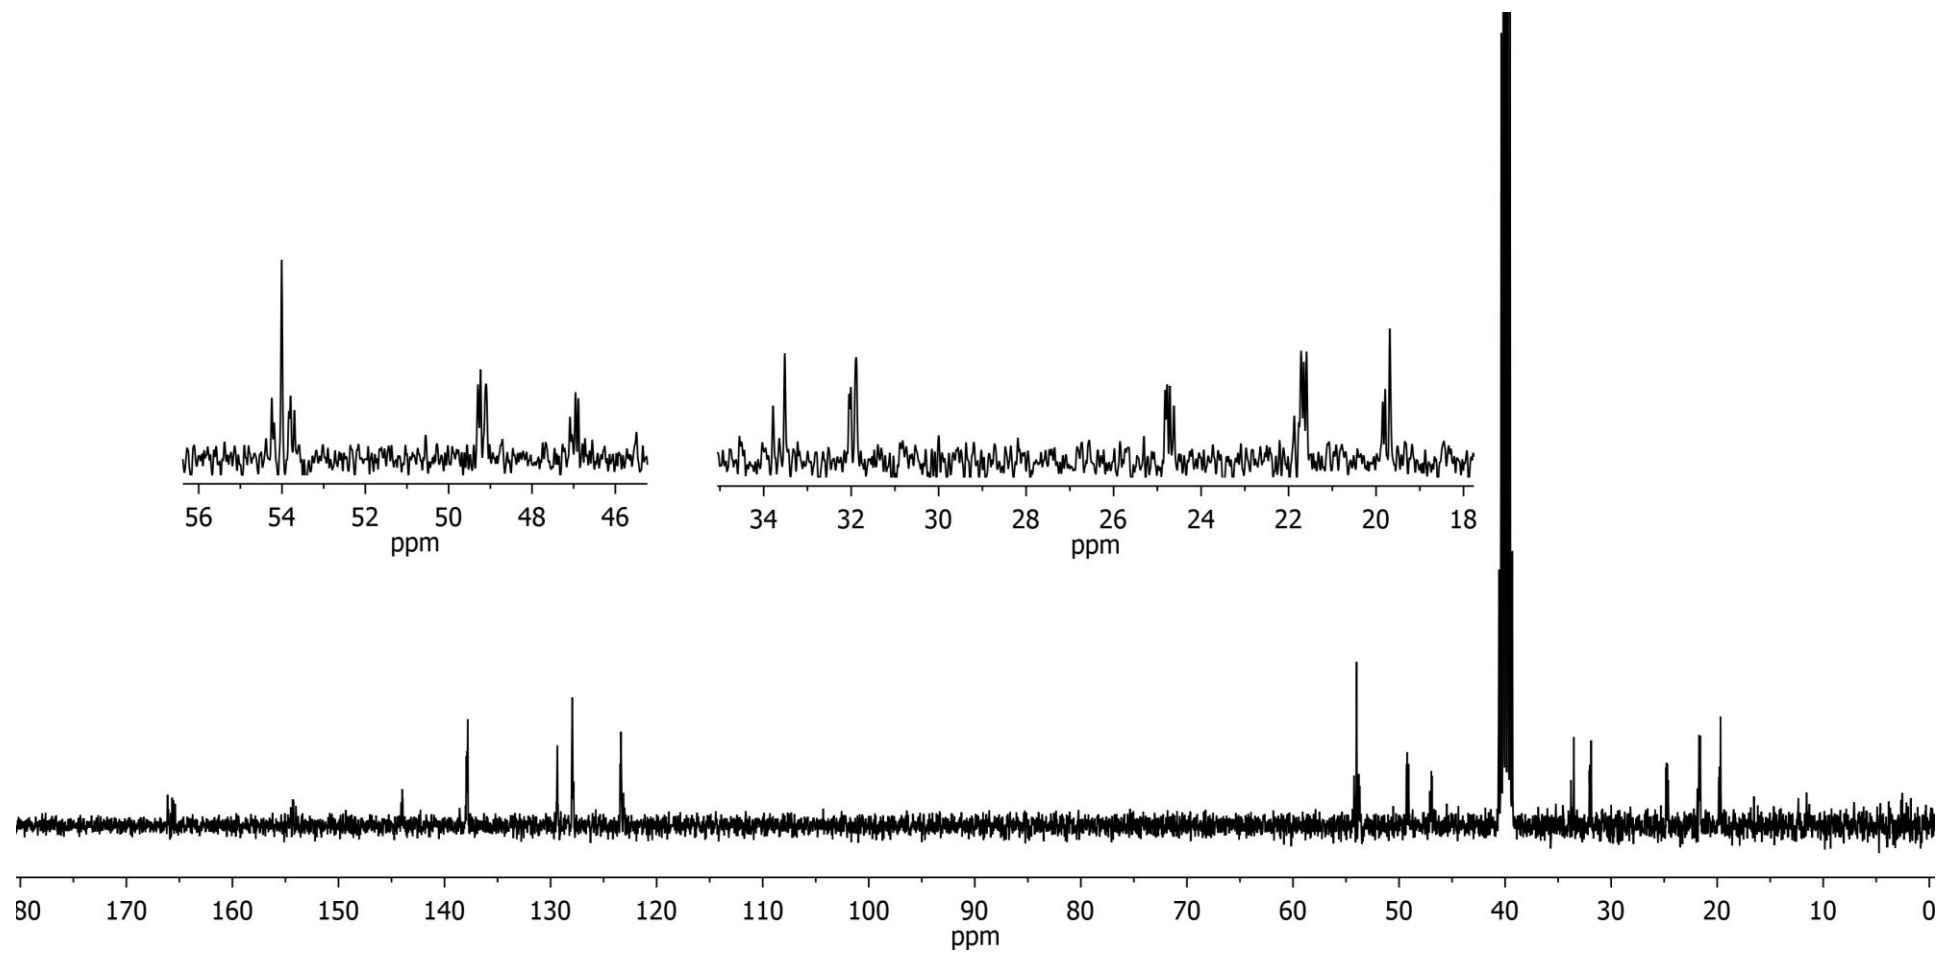

**Figure S13.**  $^{13}\text{C}$  NMR spectra of L3 in  $\text{DMSO-d}_6$  at  $25^\circ\text{C}$

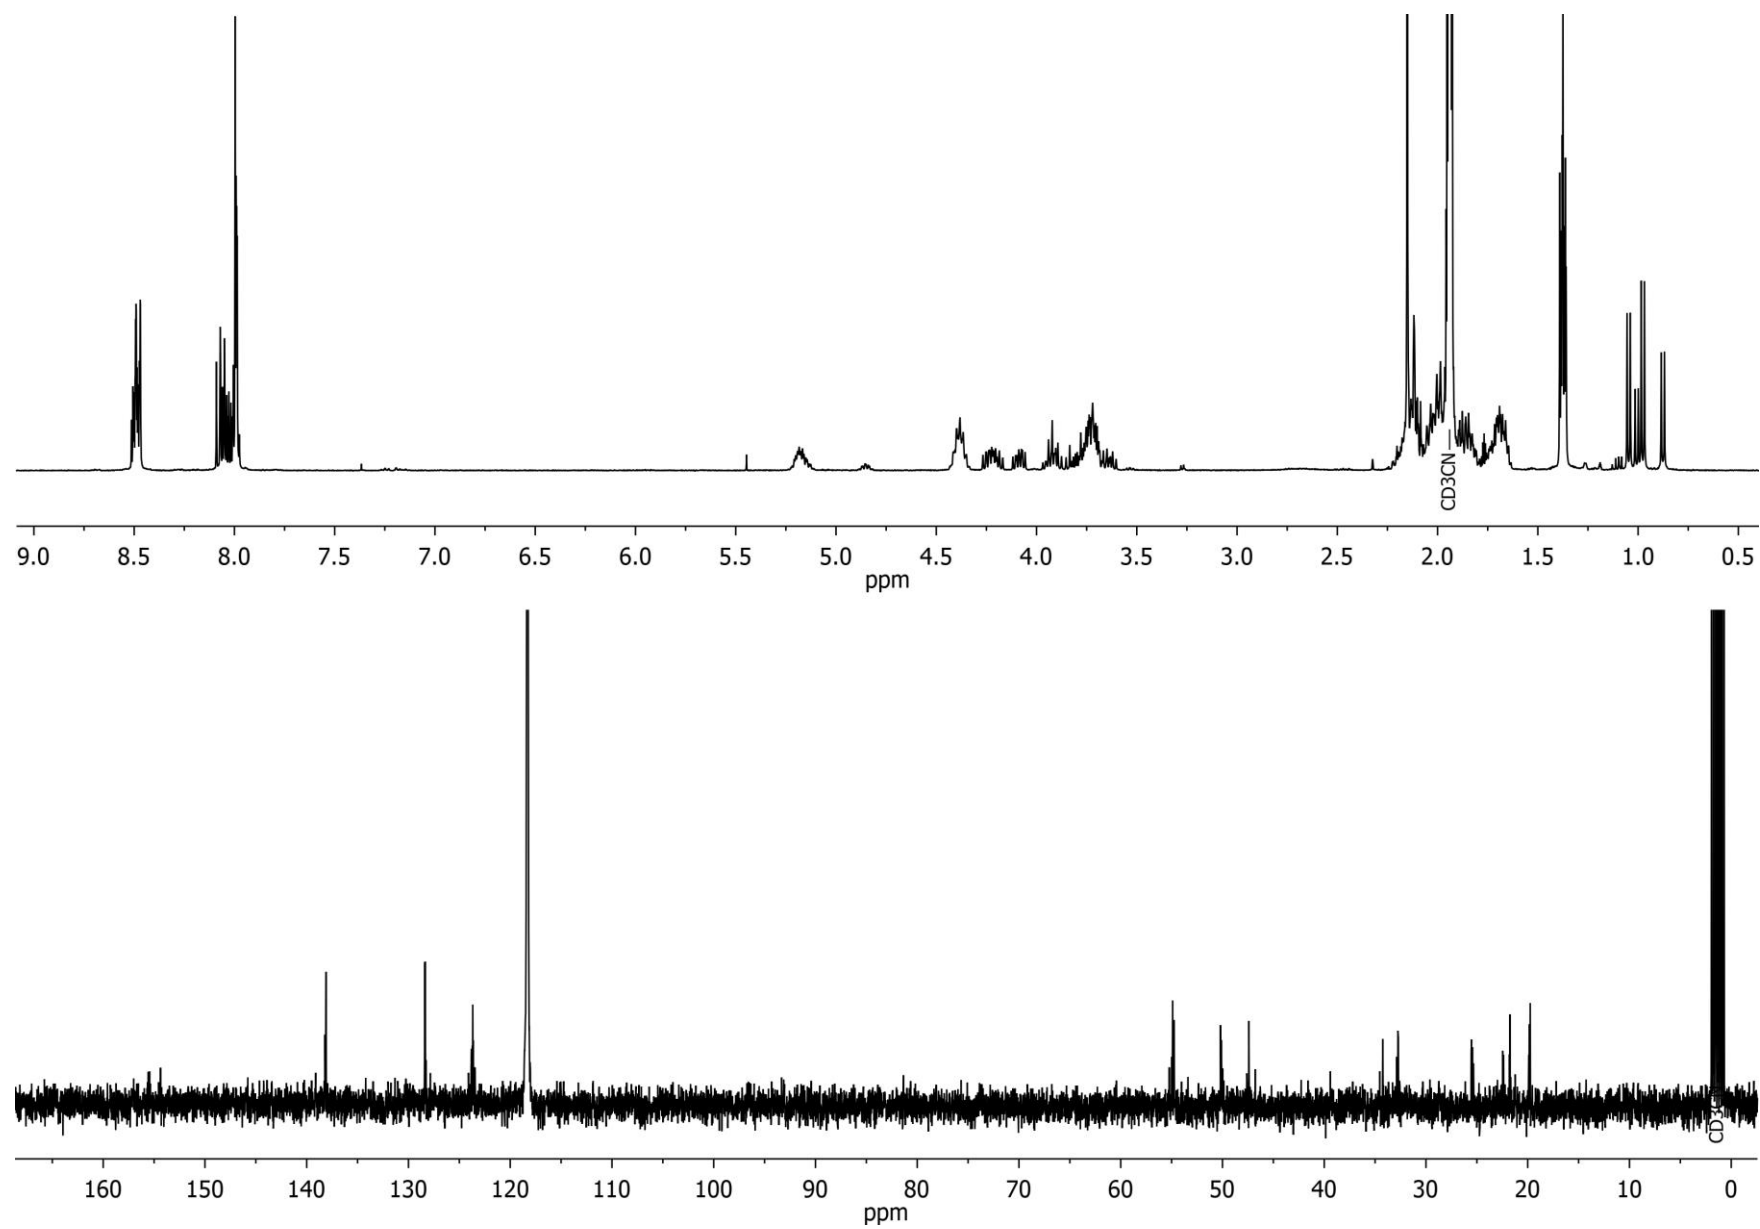

**Figure S14.** <sup>1</sup>H NMR and <sup>13</sup>C NMR spectra of L3 in CD<sub>3</sub>CN at 25°C

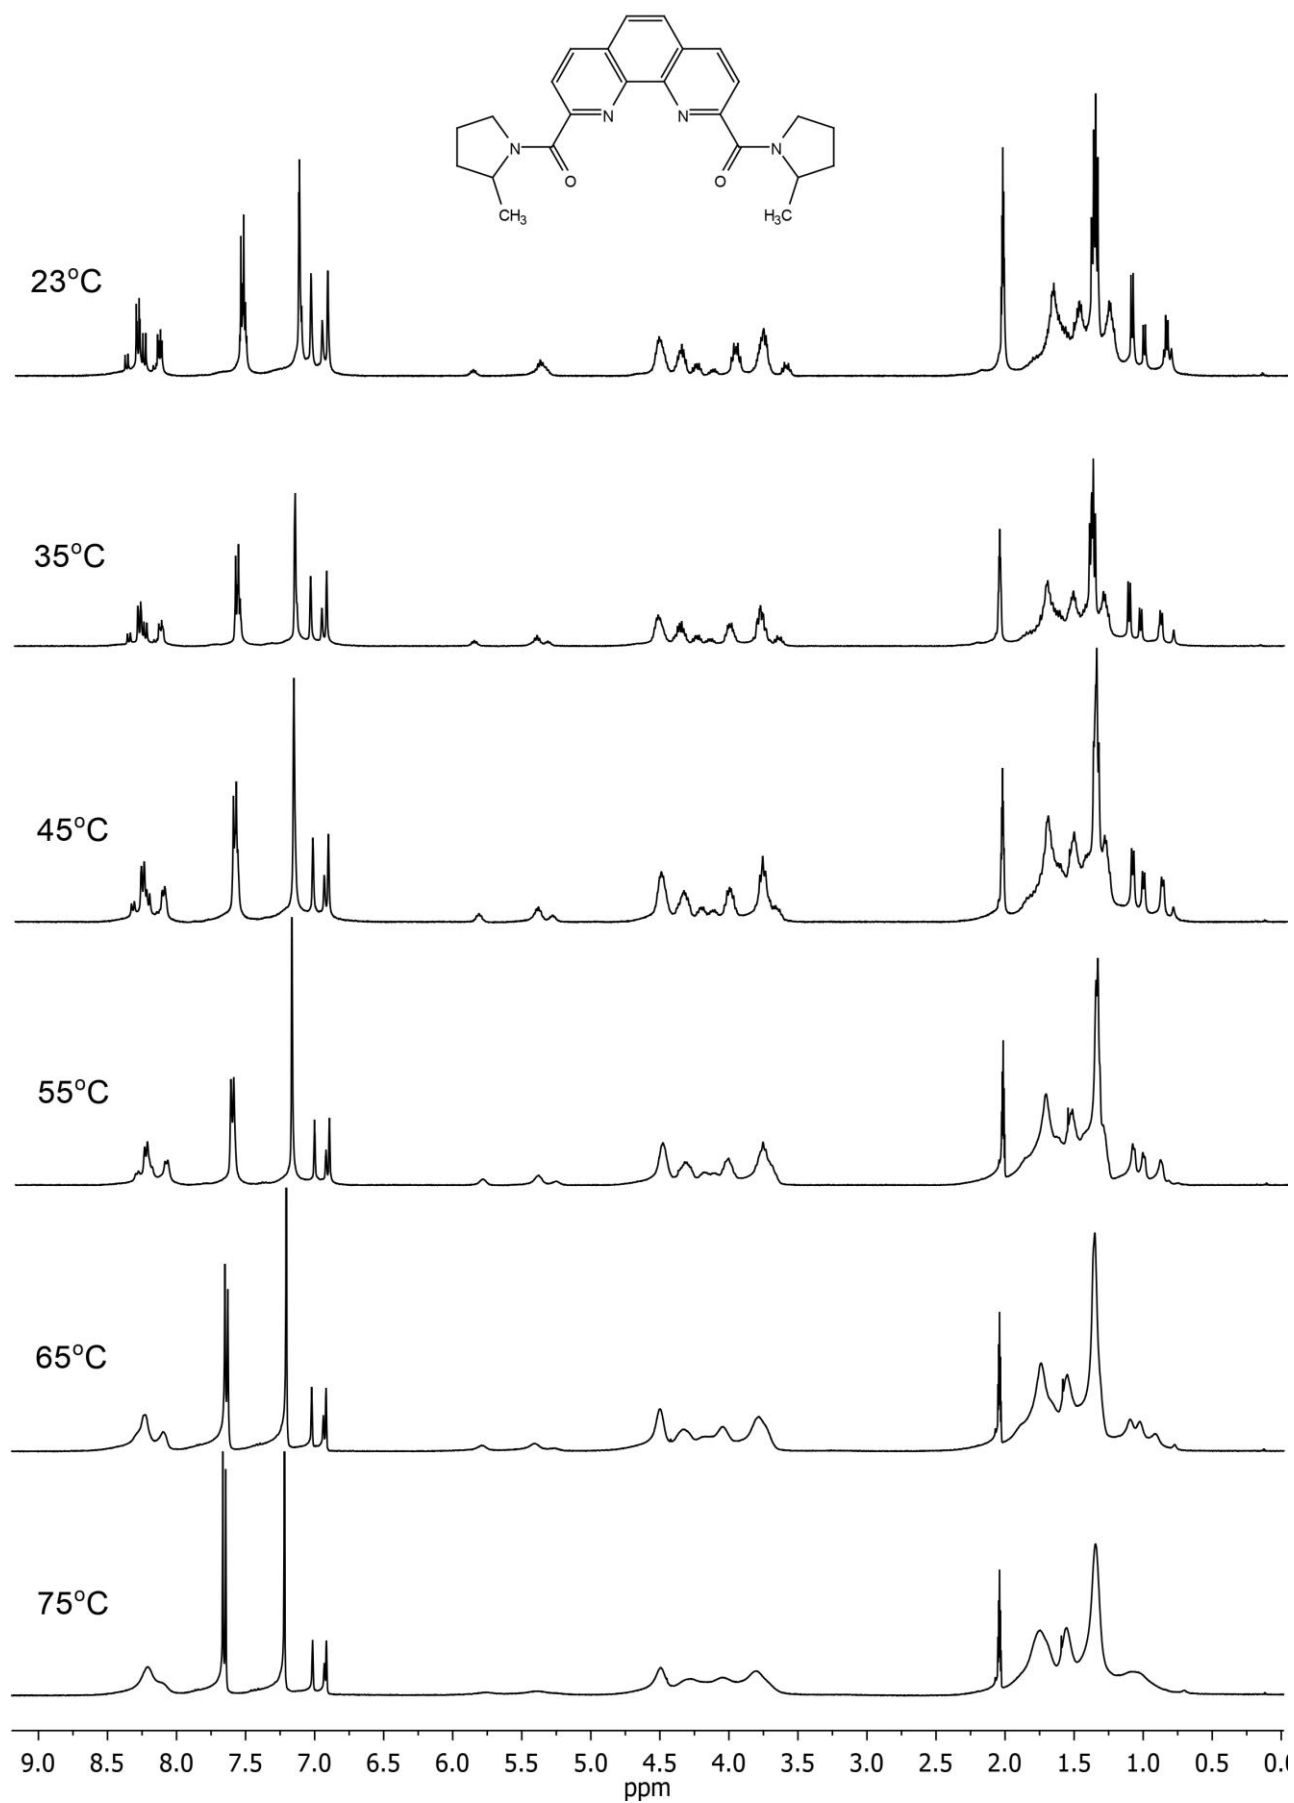

**Figure S15.** <sup>1</sup>H NMR spectra of L3 in toluene-d<sub>8</sub> at different temperatures

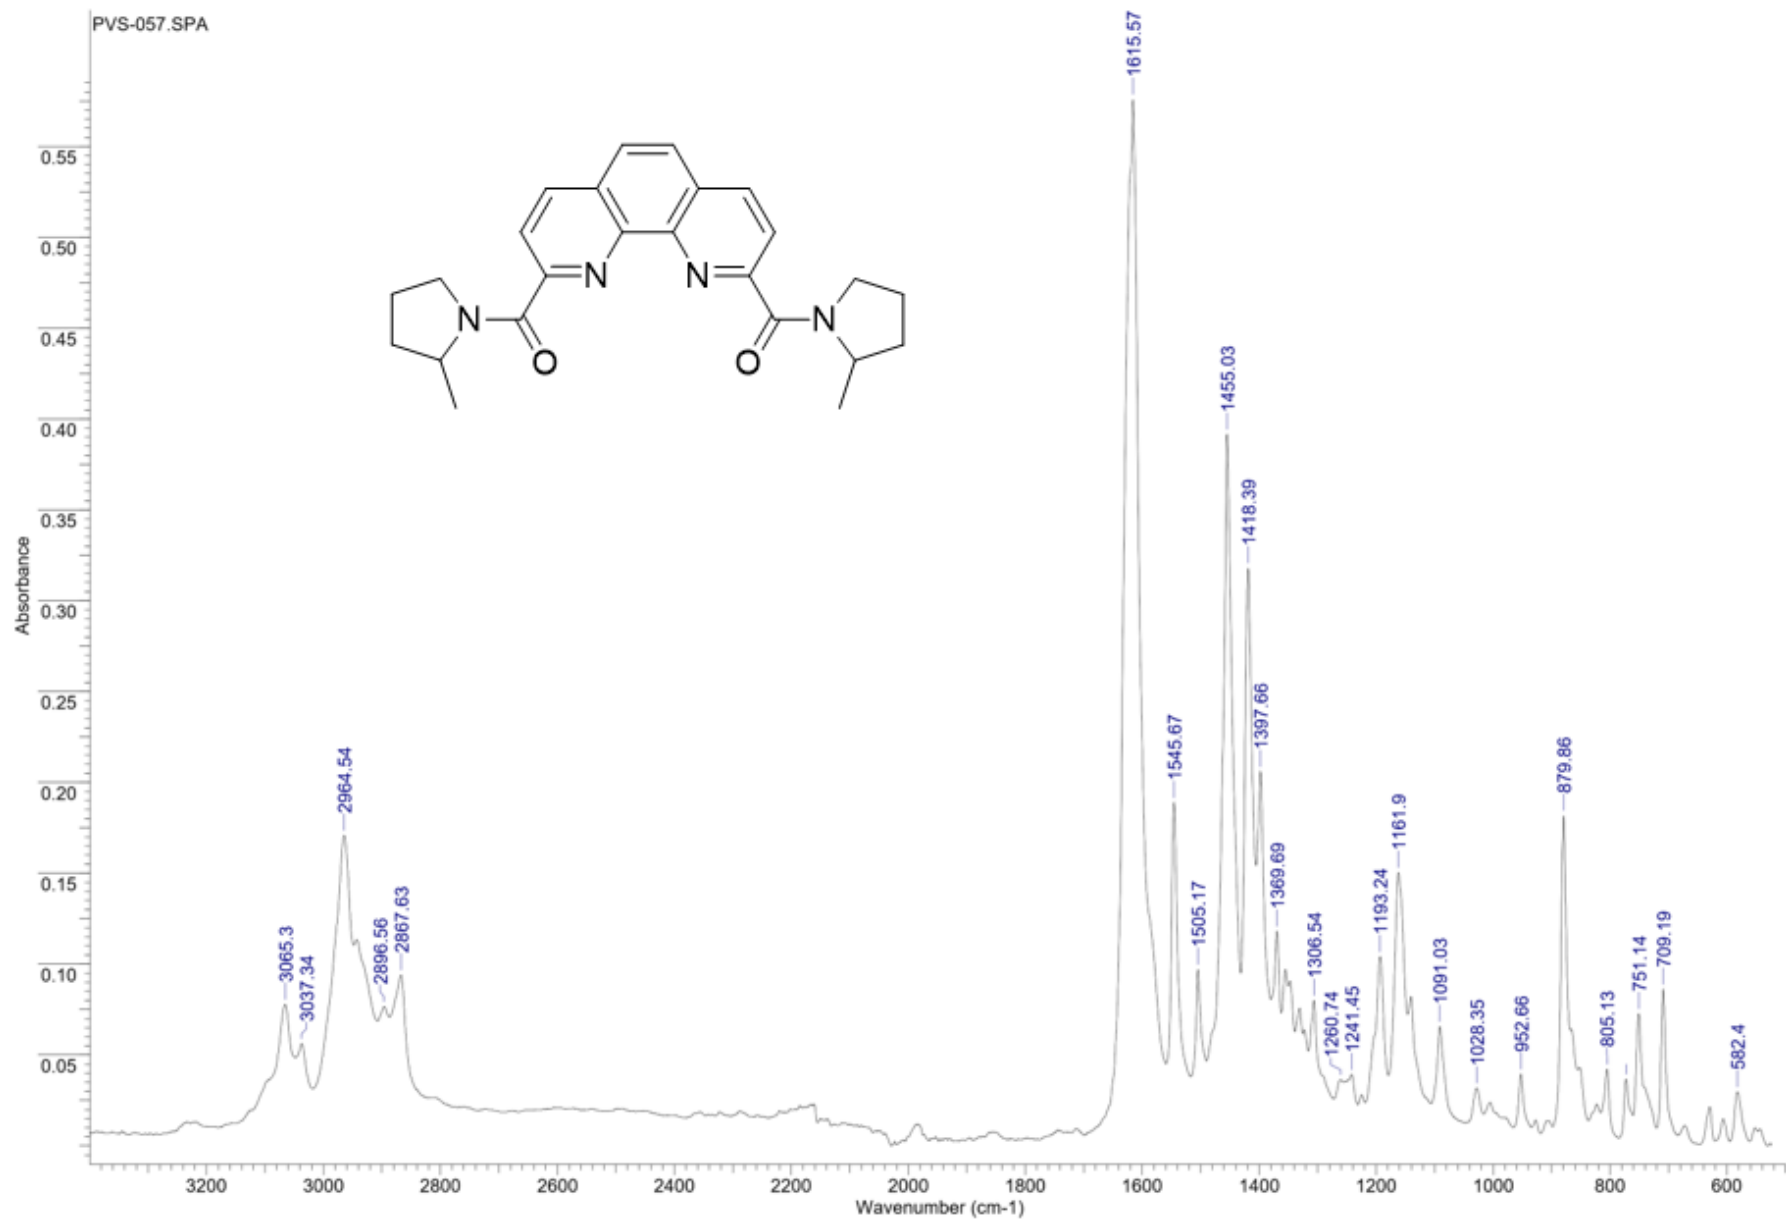

Figure S16. Solid-state IR spectra of L3 at 25°C

# Display Report

## Analysis Info

Analysis Name D:\Data\Kolotyrkina\2020\Muzalevsky\0730052.d  
Method tune\_50-1600.m  
Sample Name /MUSE PVS-057  
Comment C24H26N4O2 mH 403.2128 clb added CH3CN

Acquisition Date 30.07.2020 20:43:23  
Operator BDAL@DE  
Instrument / Ser# micrOTOF 10248

## Acquisition Parameter

|             |            |                      |          |                  |           |
|-------------|------------|----------------------|----------|------------------|-----------|
| Source Type | ESI        | Ion Polarity         | Positive | Set Nebulizer    | 1.0 Bar   |
| Focus       | Not active |                      |          | Set Dry Heater   | 200 °C    |
| Scan Begin  | 50 m/z     | Set Capillary        | 4500 V   | Set Dry Gas      | 4.0 l/min |
| Scan End    | 1600 m/z   | Set End Plate Offset | -500 V   | Set Divert Valve | Waste     |

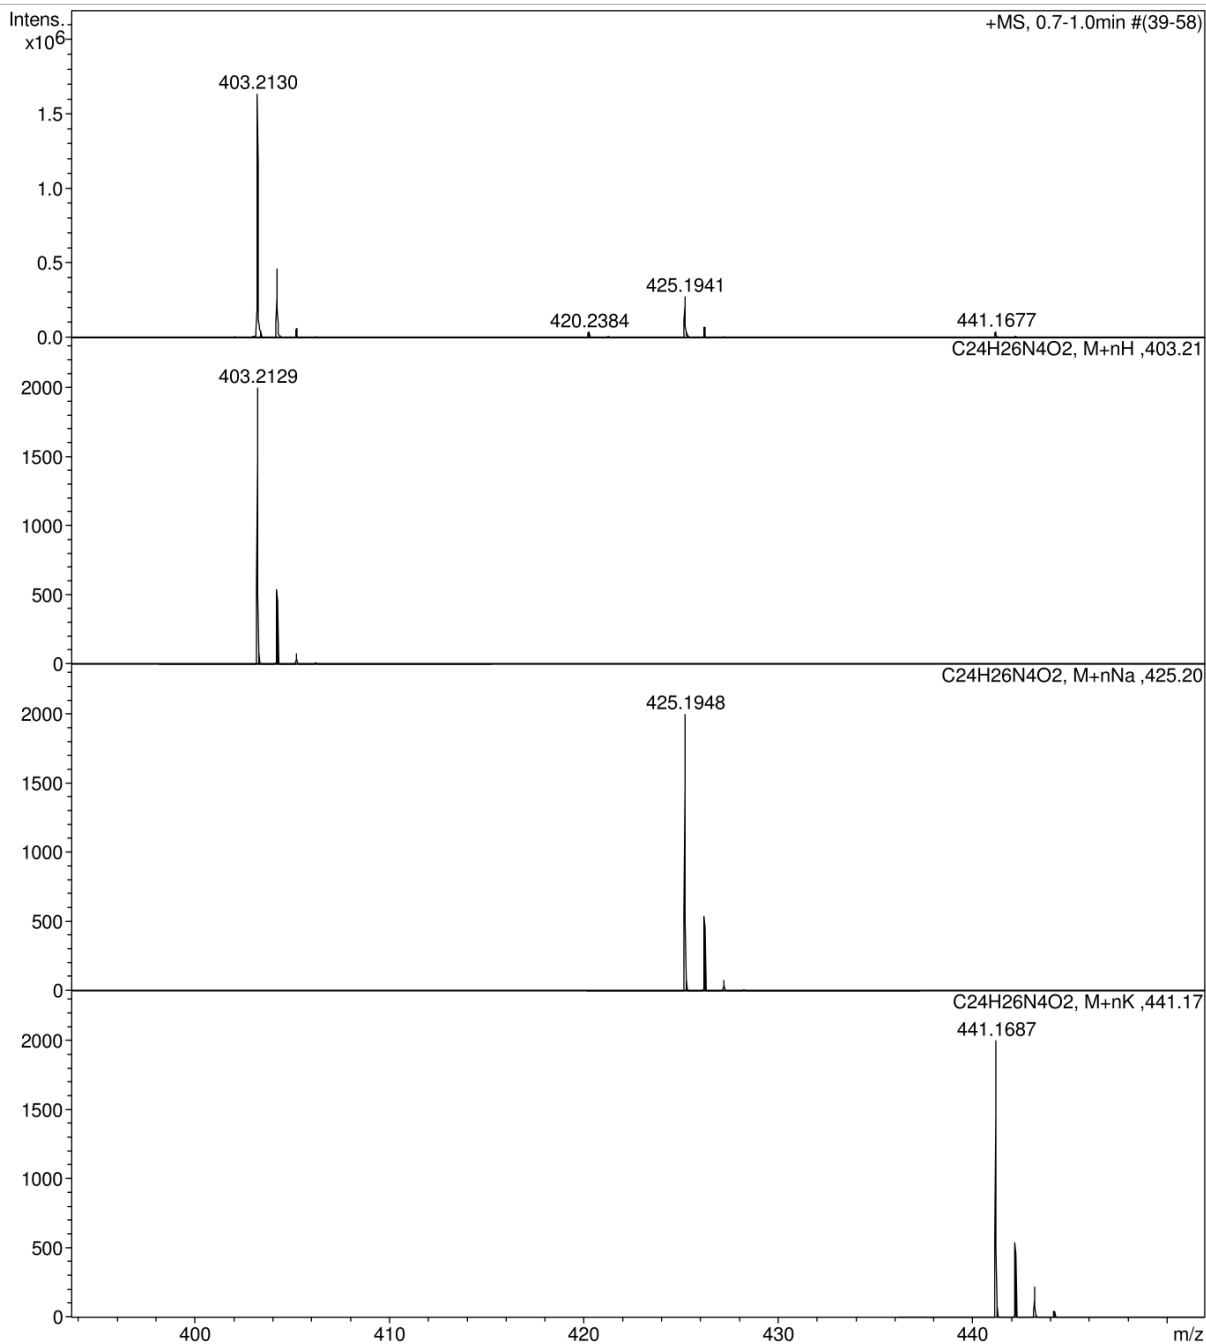

**Figure S17.** HRMS spectra of L3.

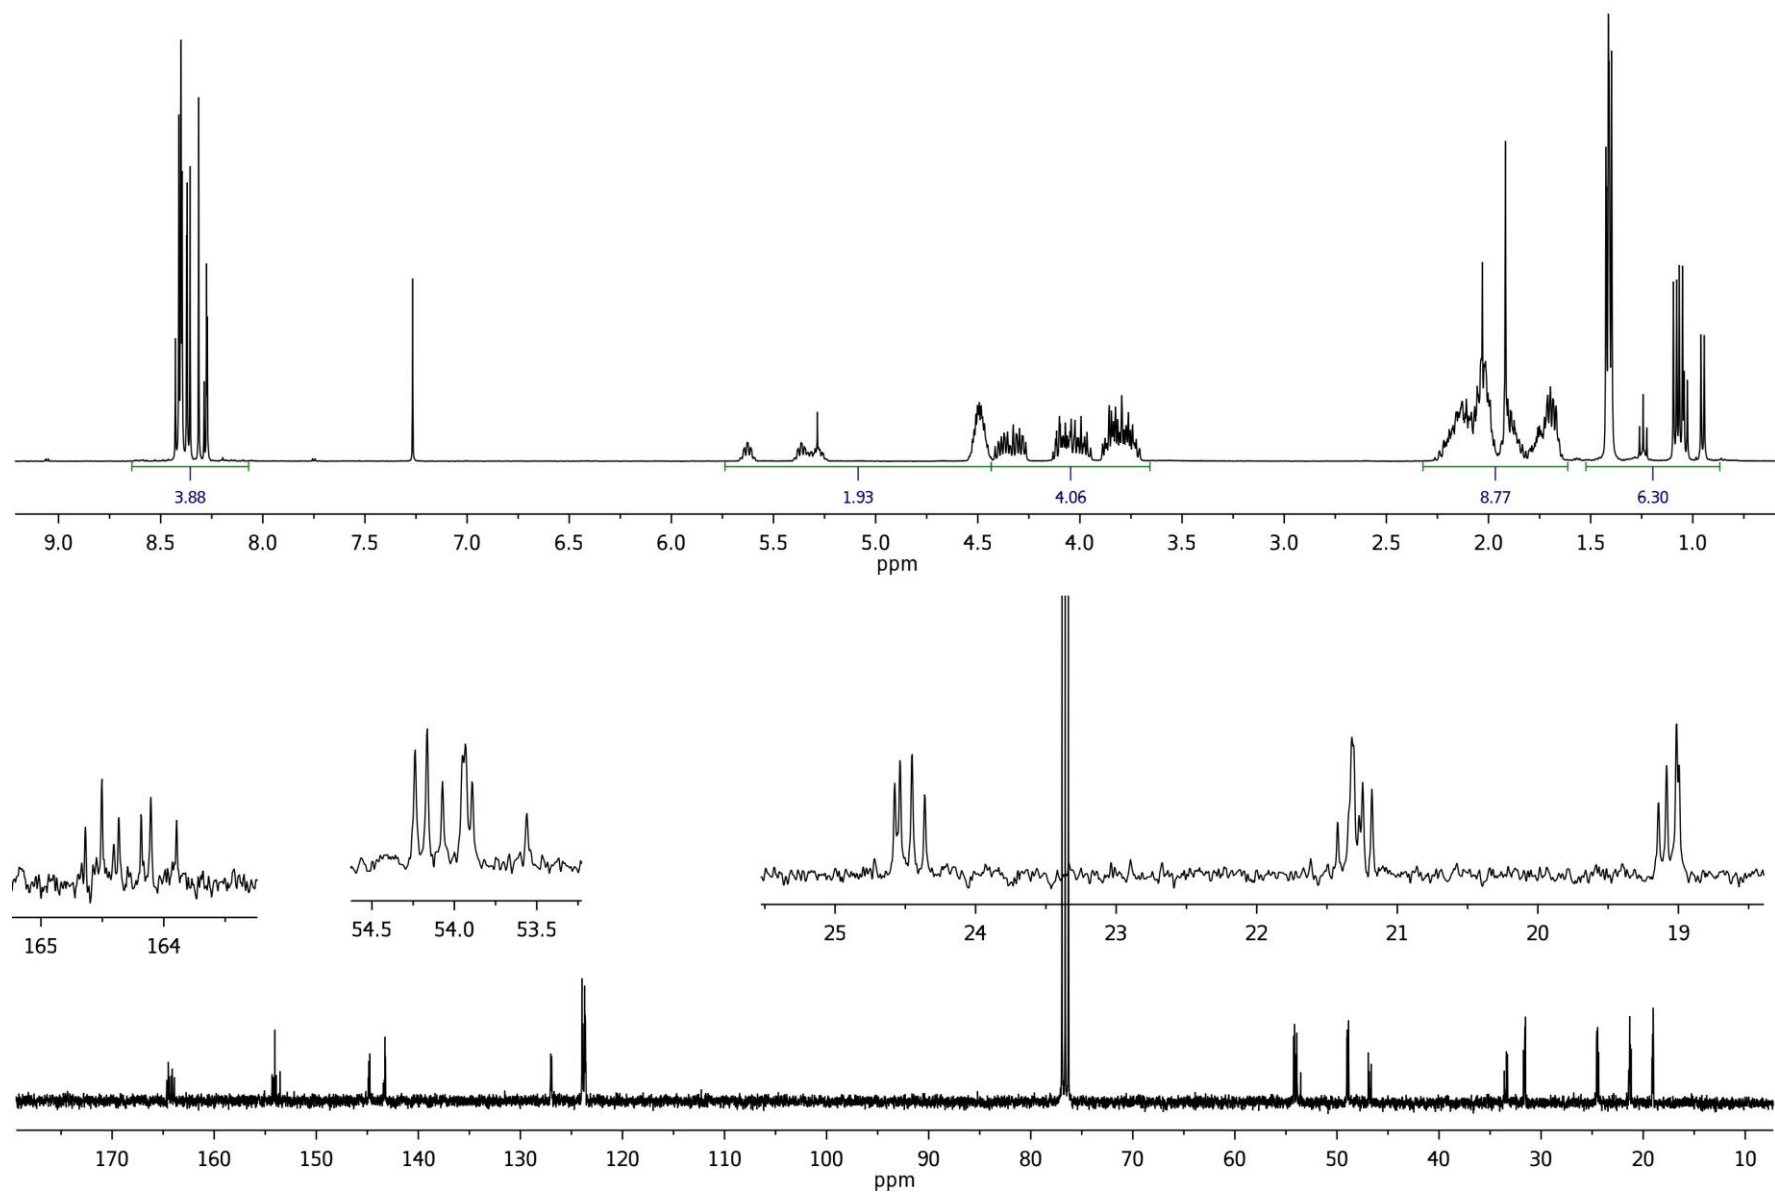

**Figure S18.**  $^1\text{H}$  NMR and  $^{13}\text{C}$  NMR spectra of **L4** in  $\text{CDCl}_3$  at  $25^\circ\text{C}$

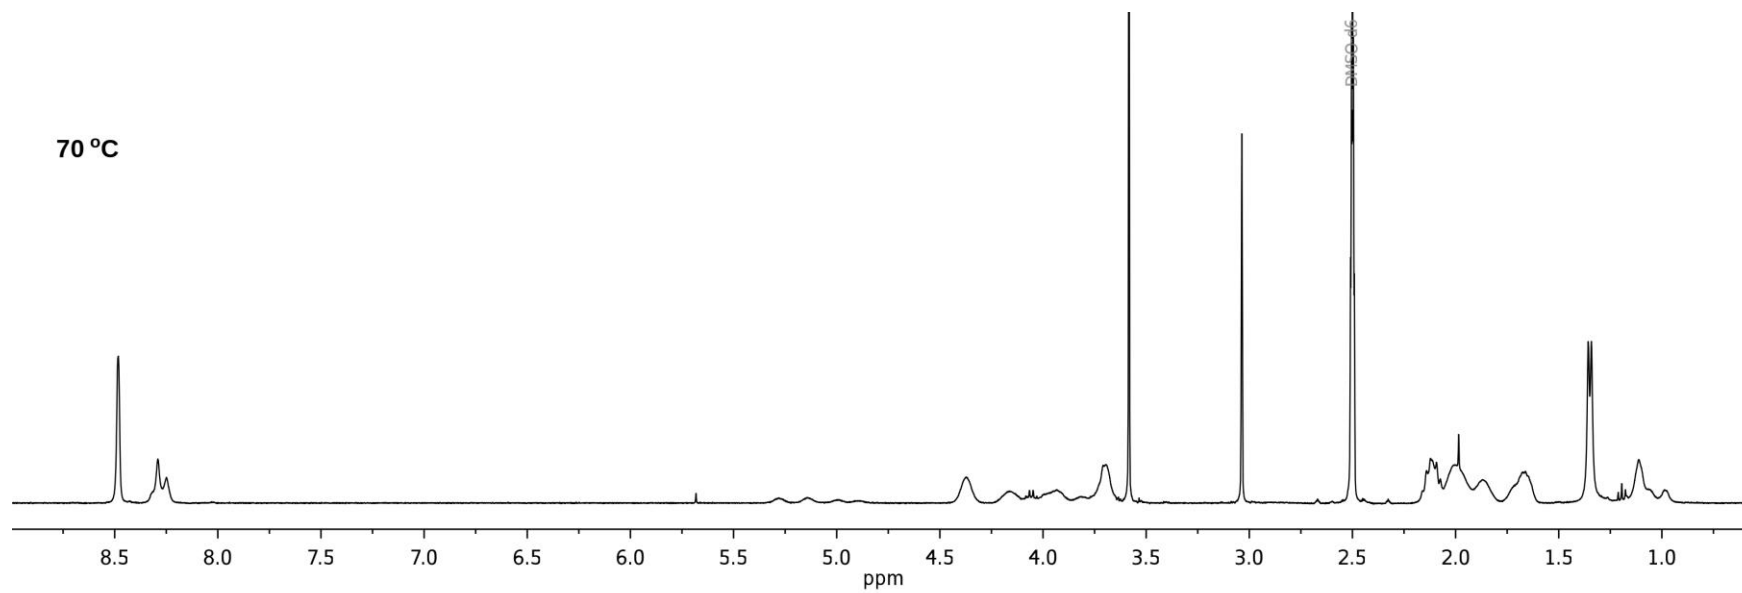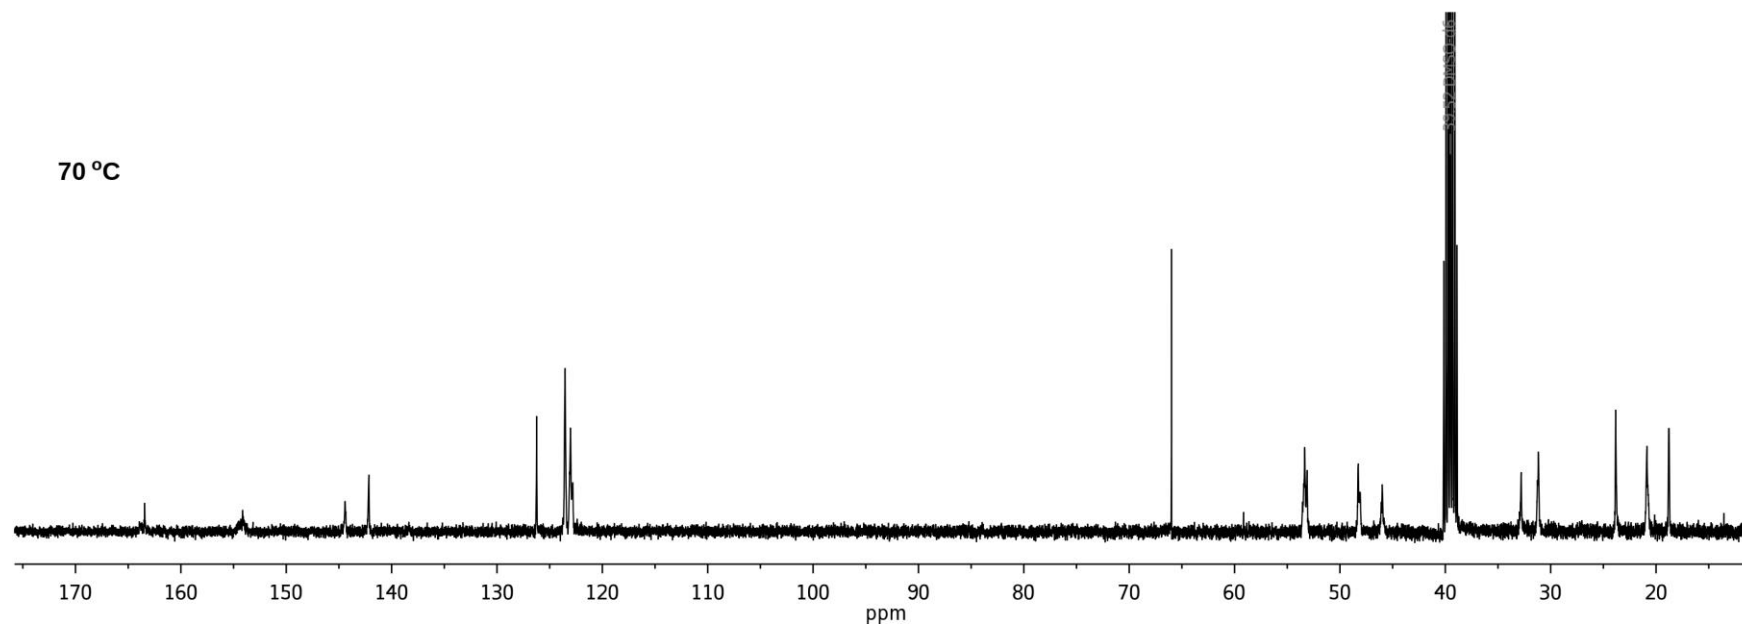

**Figure S19.**  $^1\text{H}$  NMR and  $^{13}\text{C}$  NMR spectra of **L4** in  $\text{DMSO-d}_6$  at  $70^\circ\text{C}$



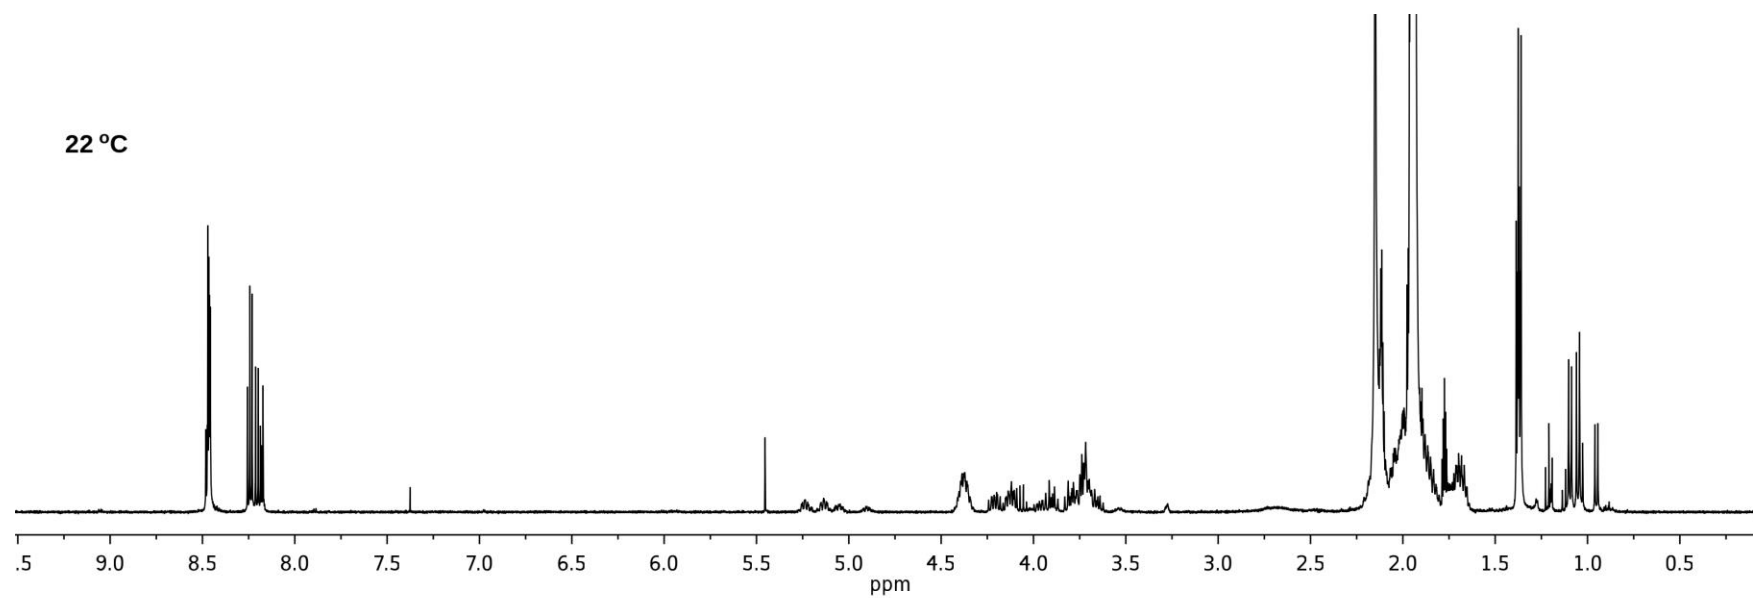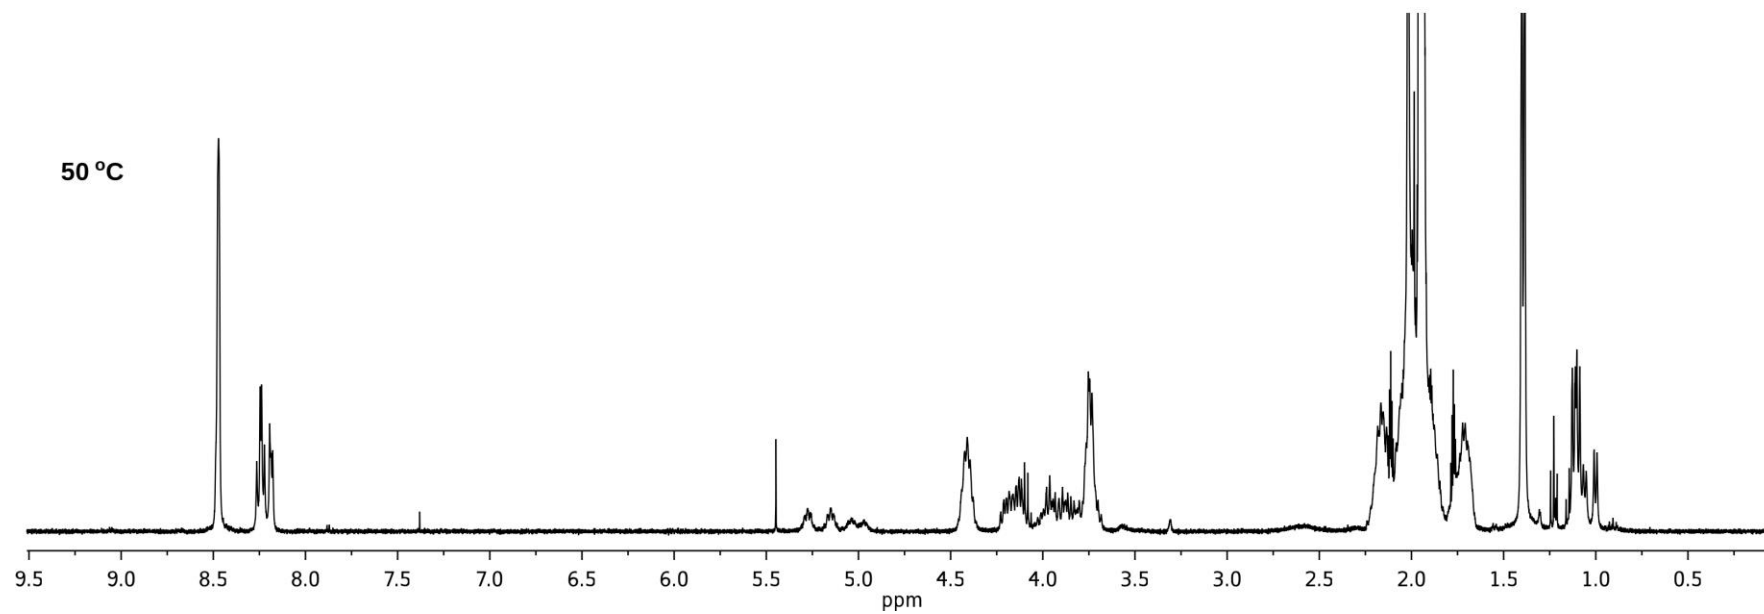

**Figure S20.**  $^1\text{H}$  NMR spectra of **L4** in  $\text{CD}_3\text{CN}$  at 22°C and 70°C



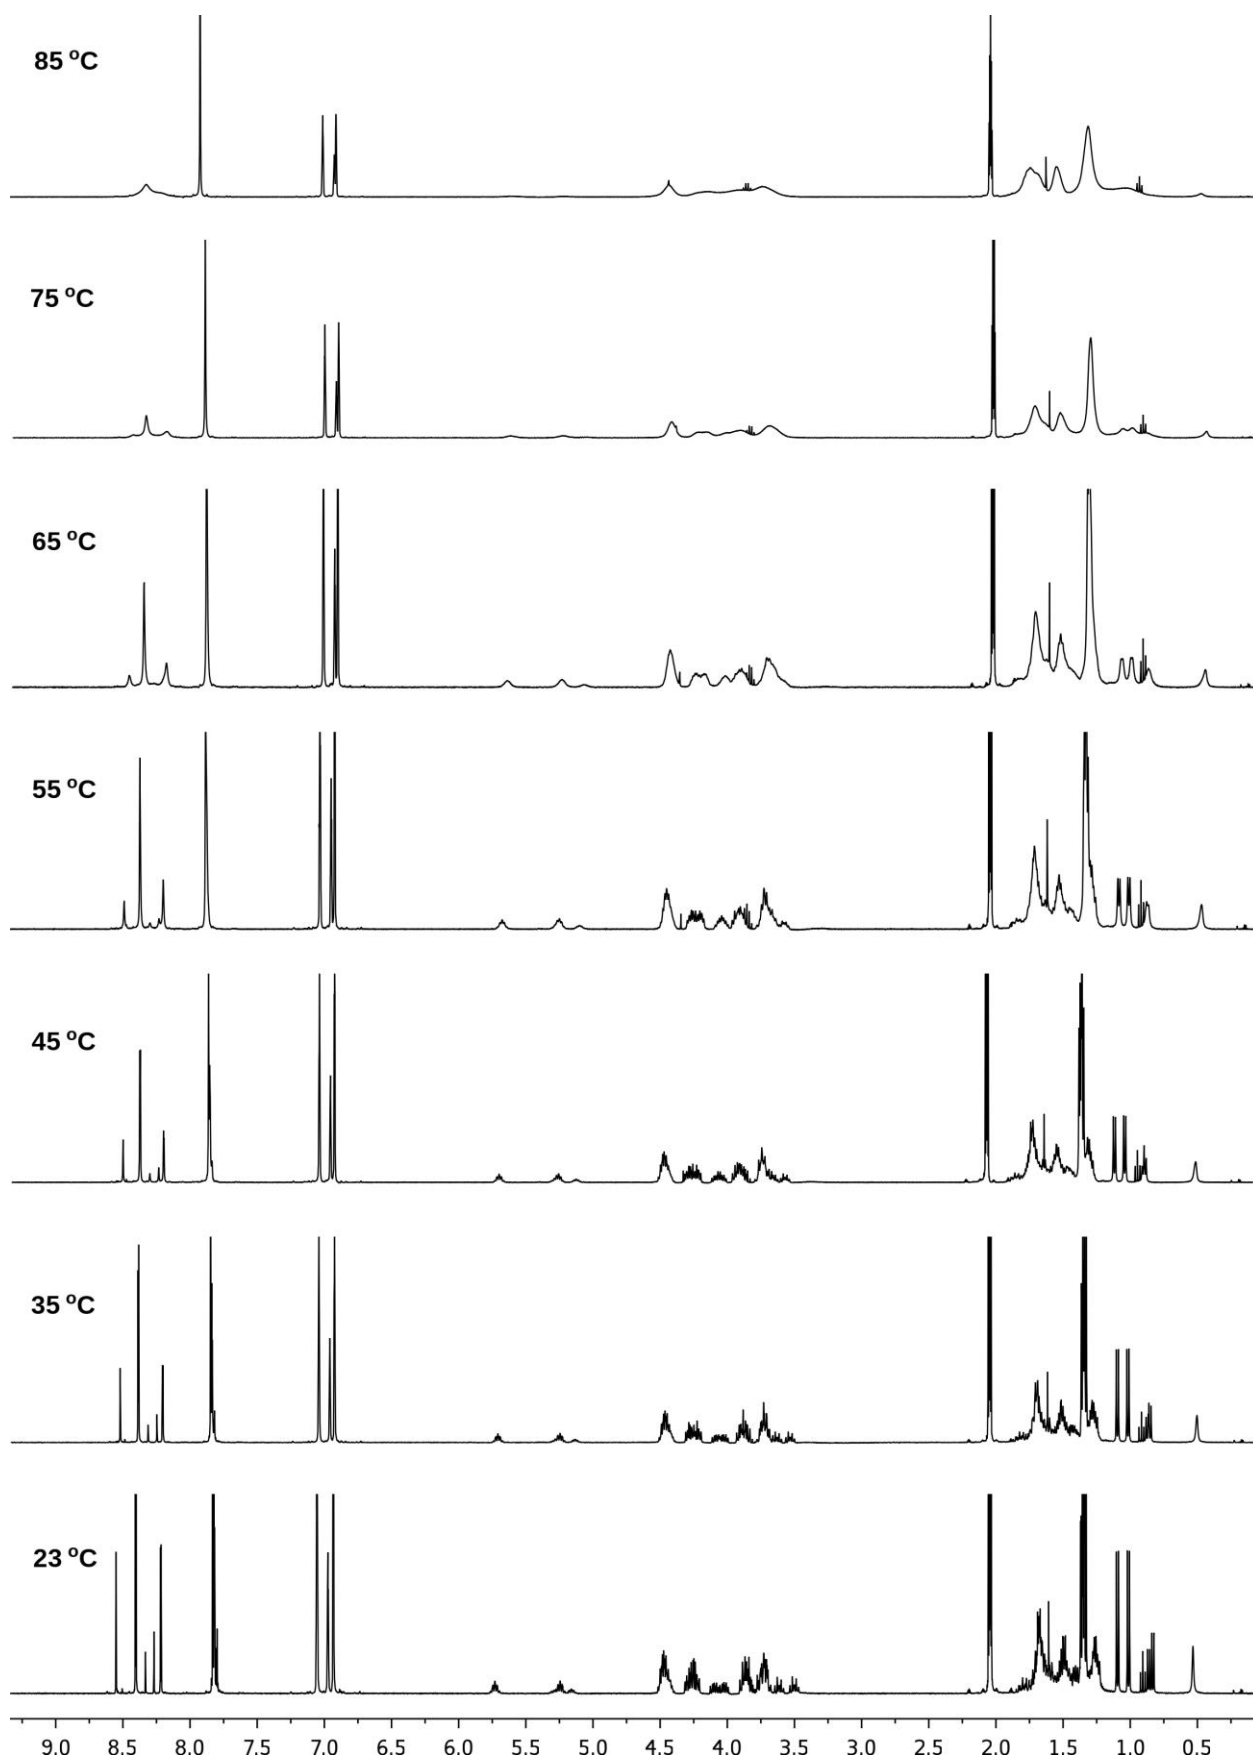

**Figure S22.** <sup>1</sup>H NMR spectra of L4 in toluene-d<sub>8</sub> at different temperatures

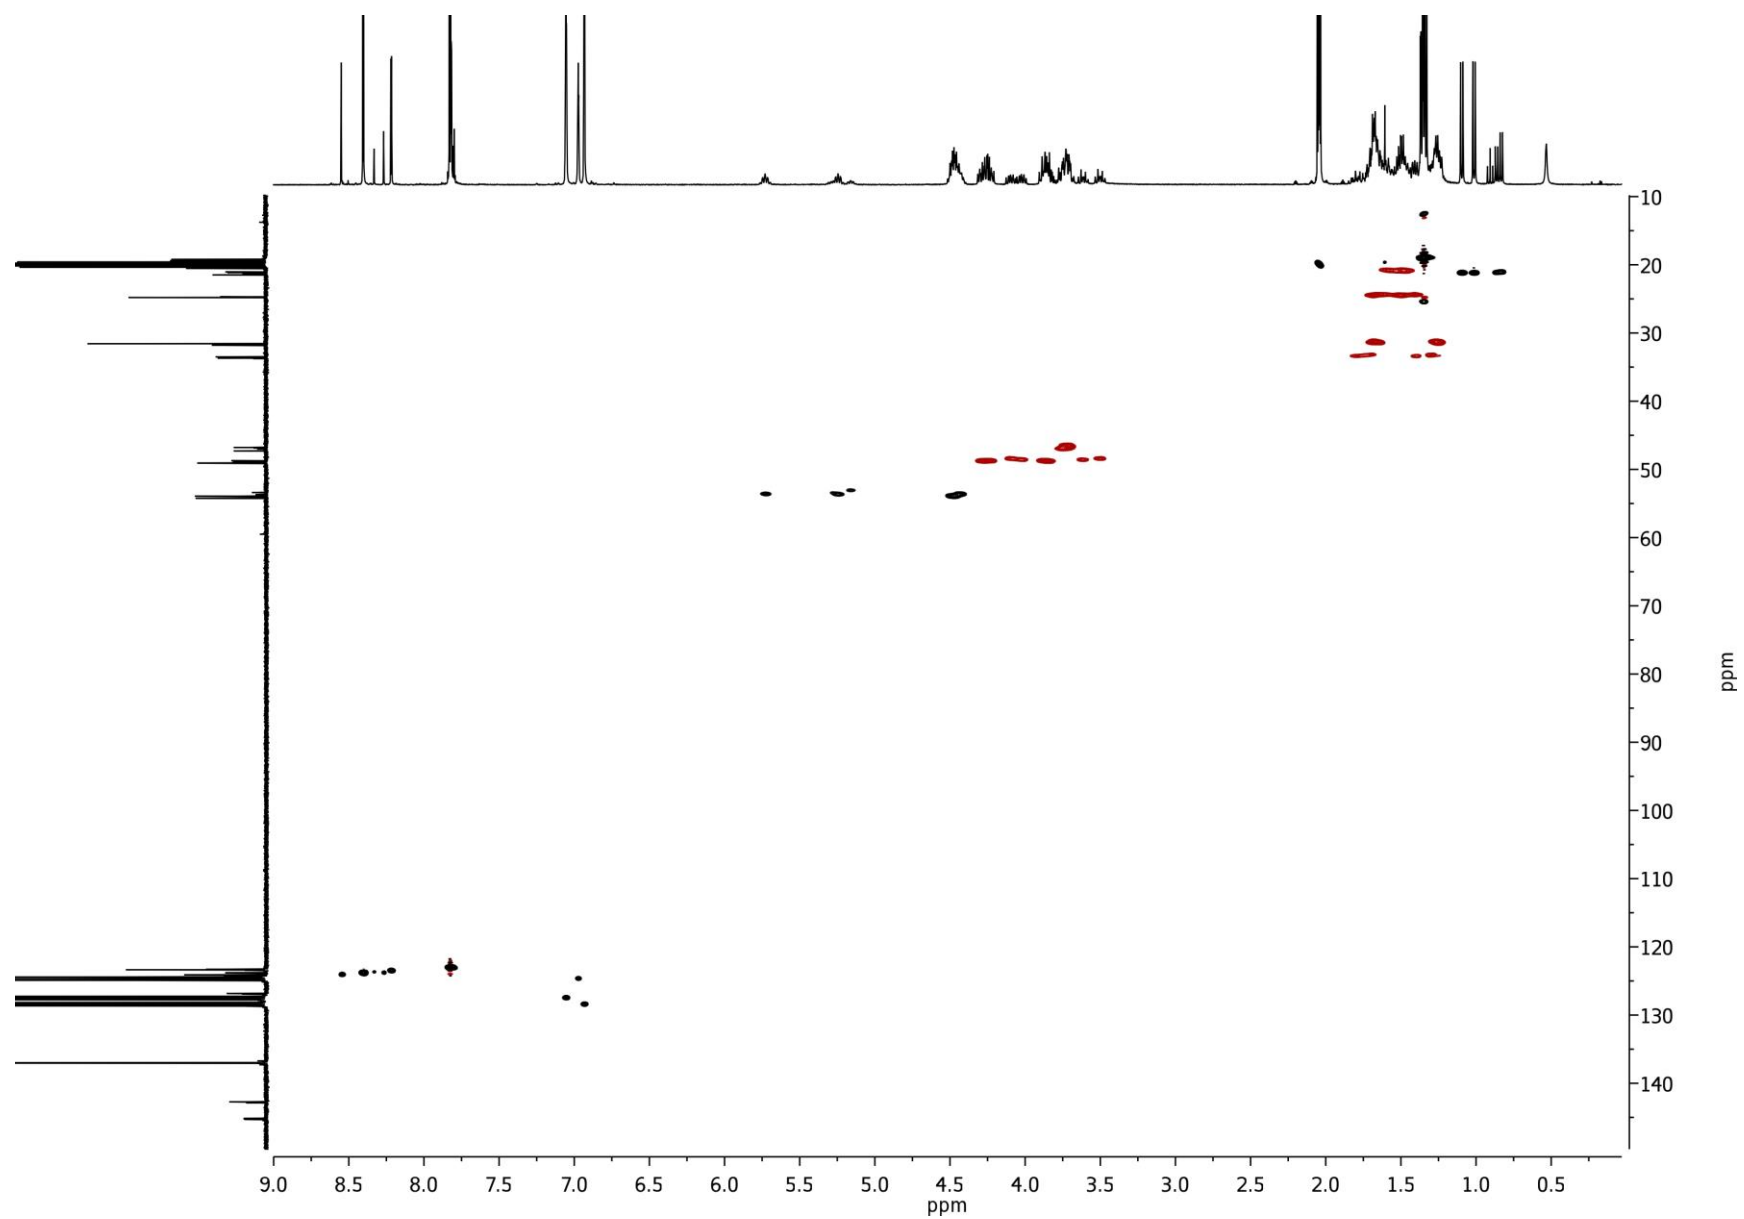

**Figure S23.**  $^1\text{H}/^{13}\text{C}$  HSQC spectra of **L4** in toluene- $d_8$  at 22°C

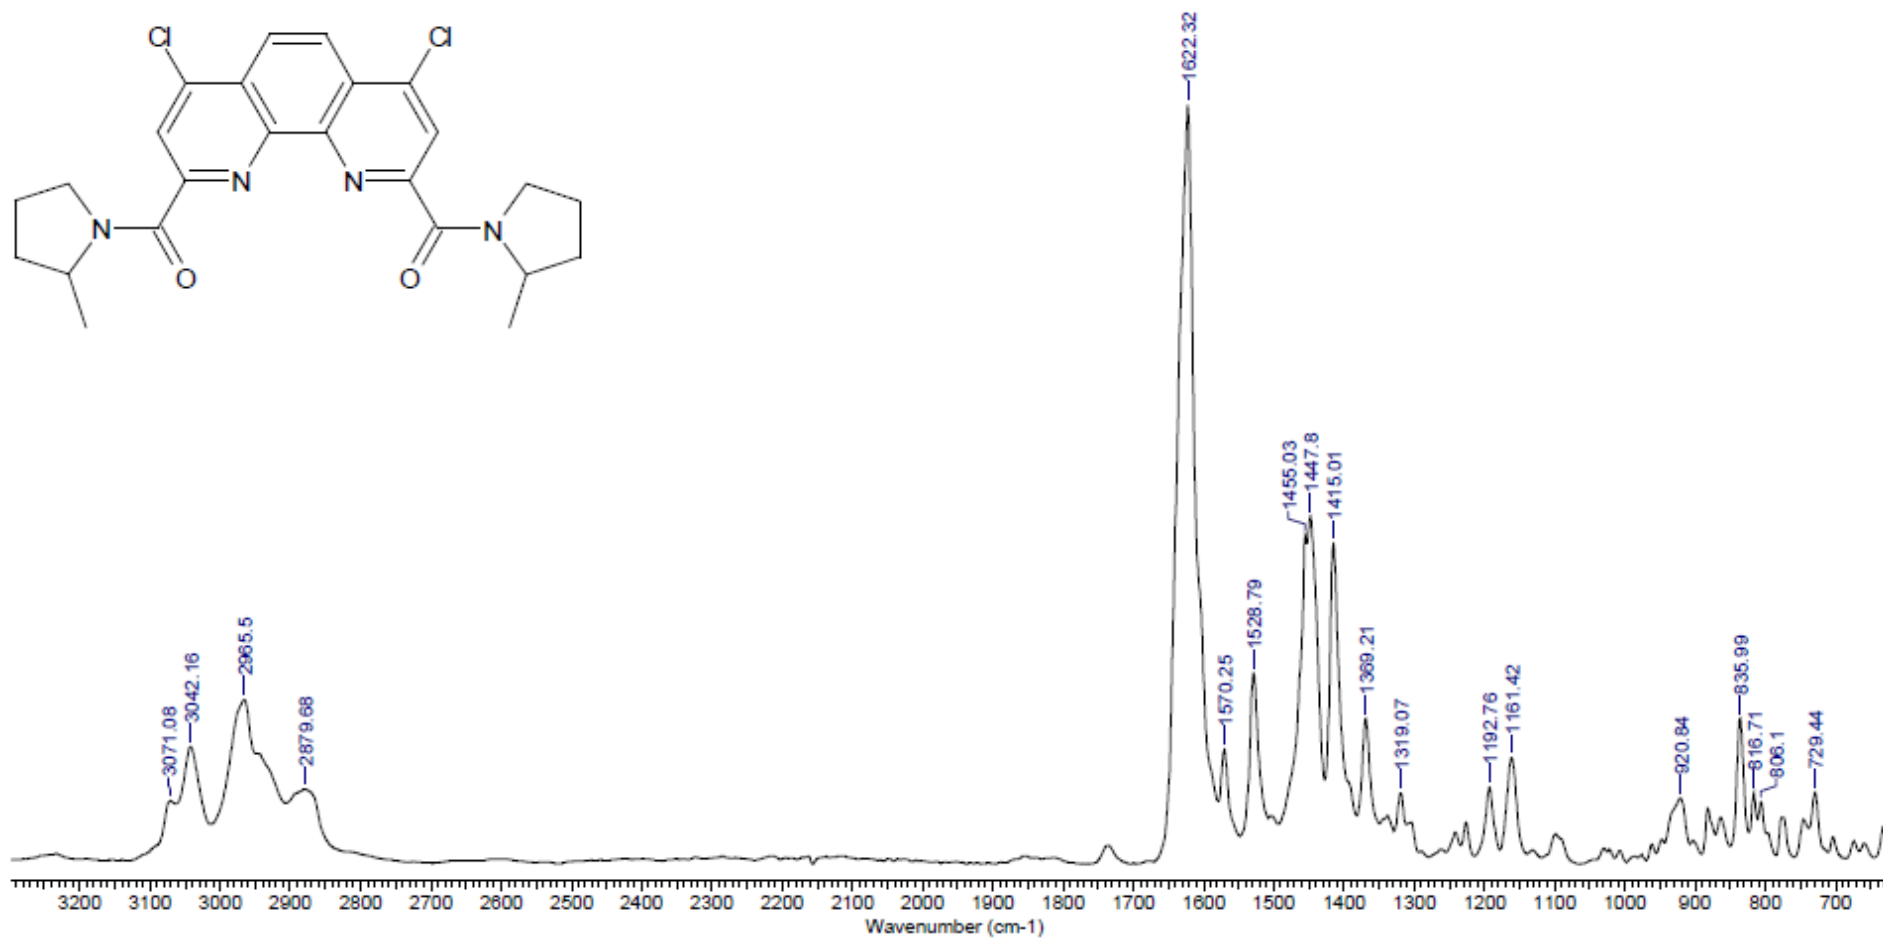

**Figure S24.** Solid-state IR spectra of L4 at 25°C

# Display Report

## Analysis Info

Analysis Name D:\Data\Kolotyrykina\2020\Muzalevsky\0715009.d  
Method tune\_50-1600.m  
Sample Name /MUSE PVS-048  
Comment C24H24Cl2N4O2 mH 471.1349 calibrant added CH3CN

Acquisition Date 15.07.2020 10:22:10

Operator BDAL@DE  
Instrument / Ser# micrOTOF 10248

## Acquisition Parameter

|             |            |                      |          |                  |           |
|-------------|------------|----------------------|----------|------------------|-----------|
| Source Type | ESI        | Ion Polarity         | Positive | Set Nebulizer    | 1.0 Bar   |
| Focus       | Not active |                      |          | Set Dry Heater   | 200 °C    |
| Scan Begin  | 50 m/z     | Set Capillary        | 4500 V   | Set Dry Gas      | 4.0 l/min |
| Scan End    | 1600 m/z   | Set End Plate Offset | -500 V   | Set Divert Valve | Waste     |

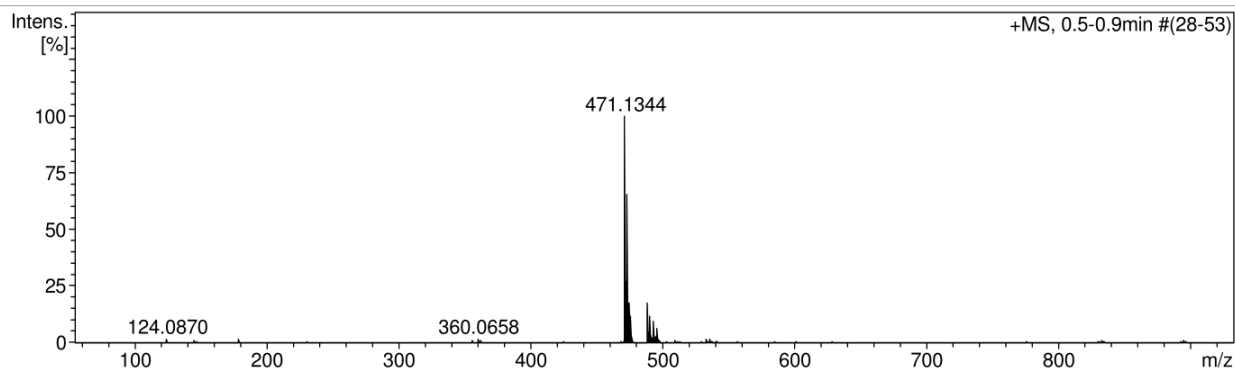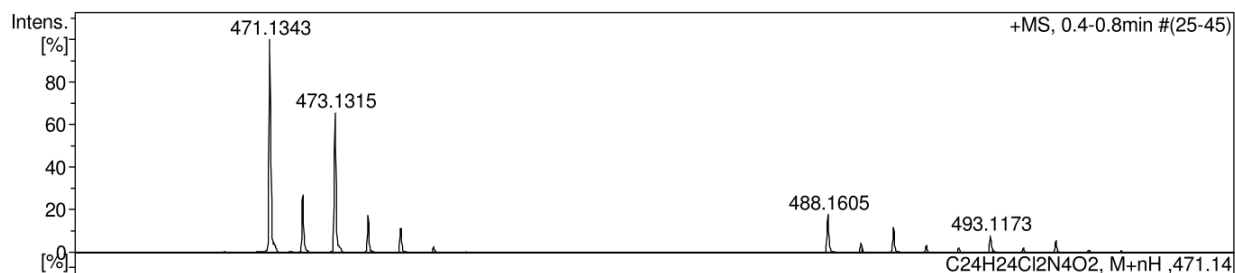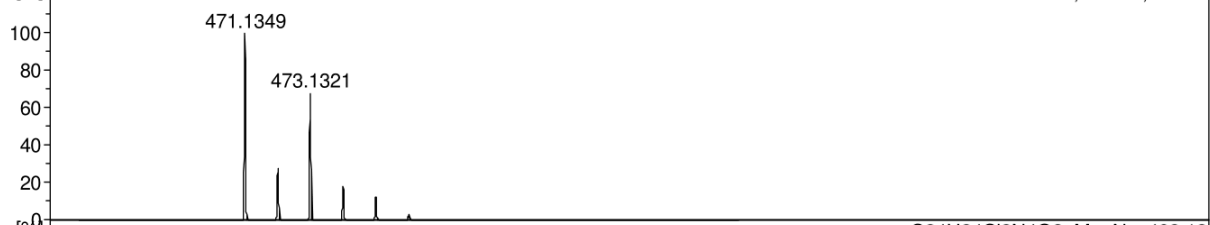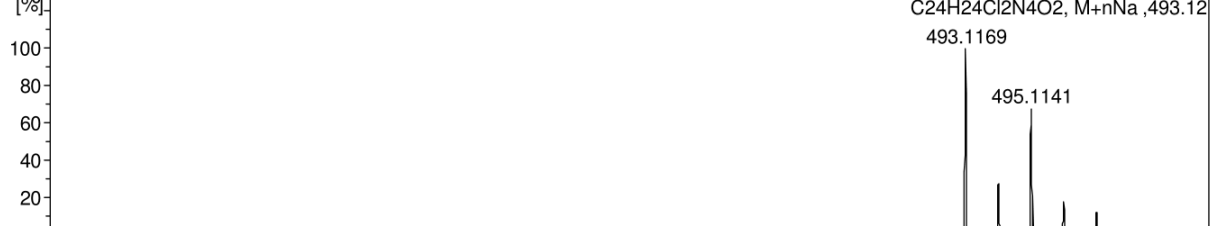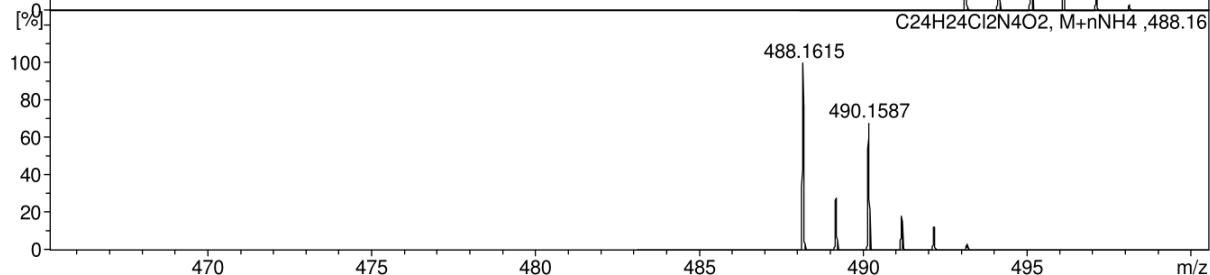

Figure S25. HRMS spectra of L4

## IR spectra of complexes

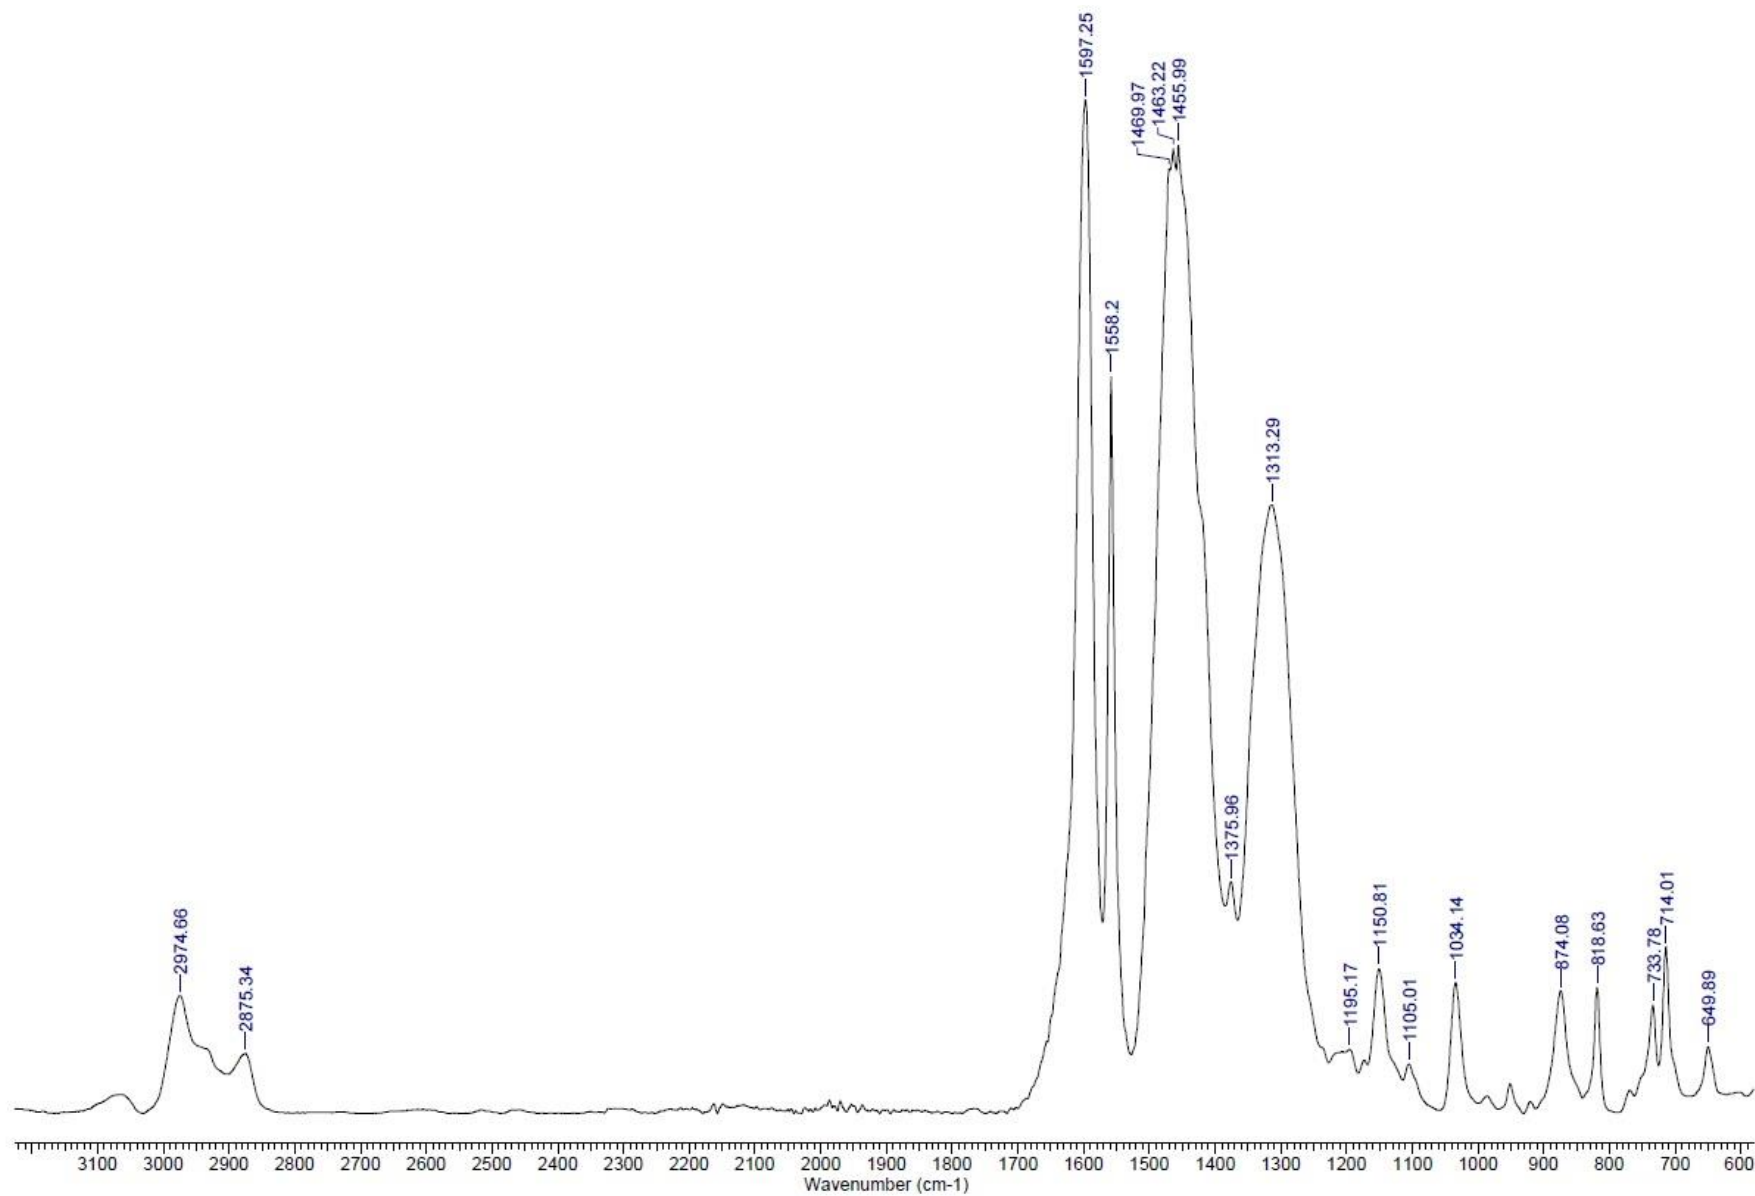

**Figure S26.** Solid-state IR spectra of complex  $L3 \cdot La(NO_3)_3$

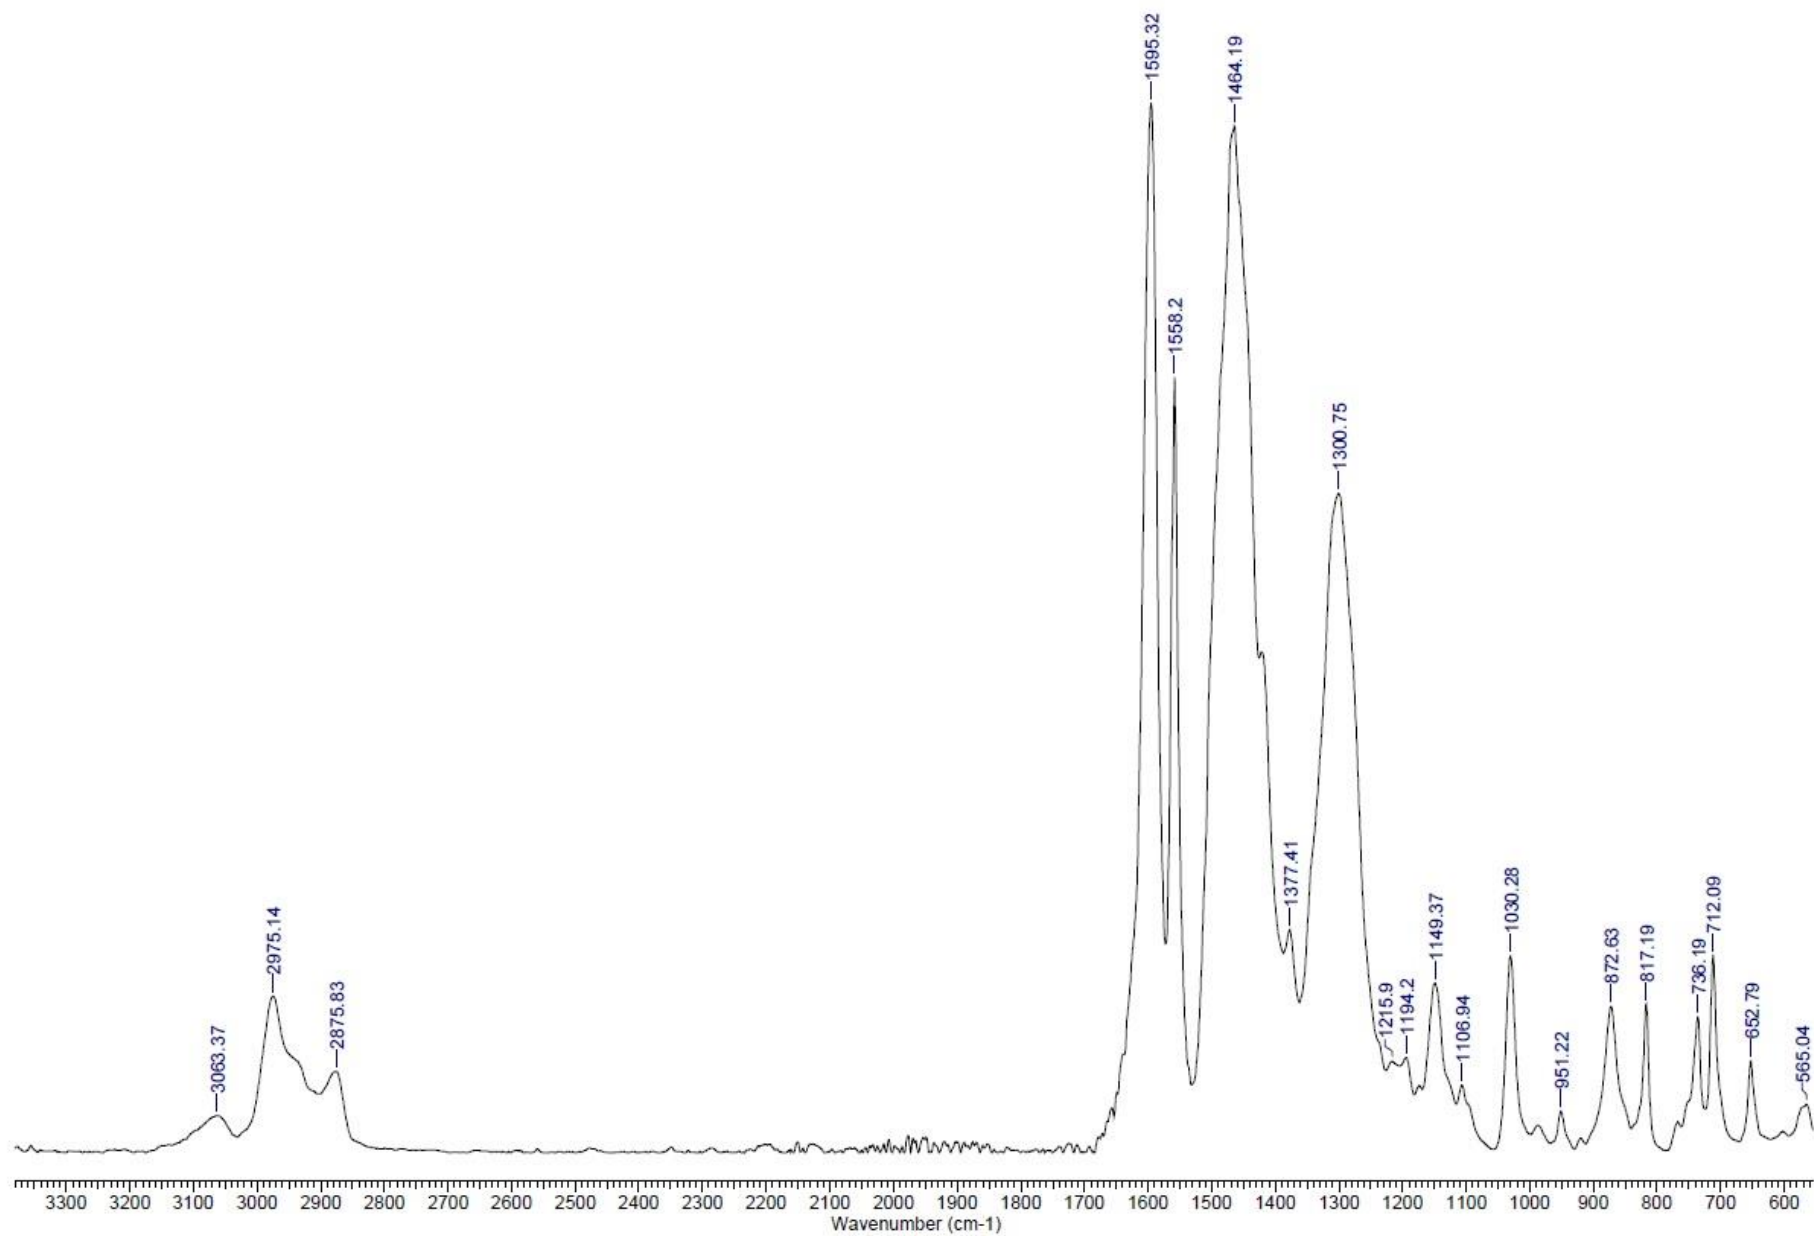

**Figure S27.** Solid-state IR spectra of complex  $L3 \cdot Nd(NO_3)_3$



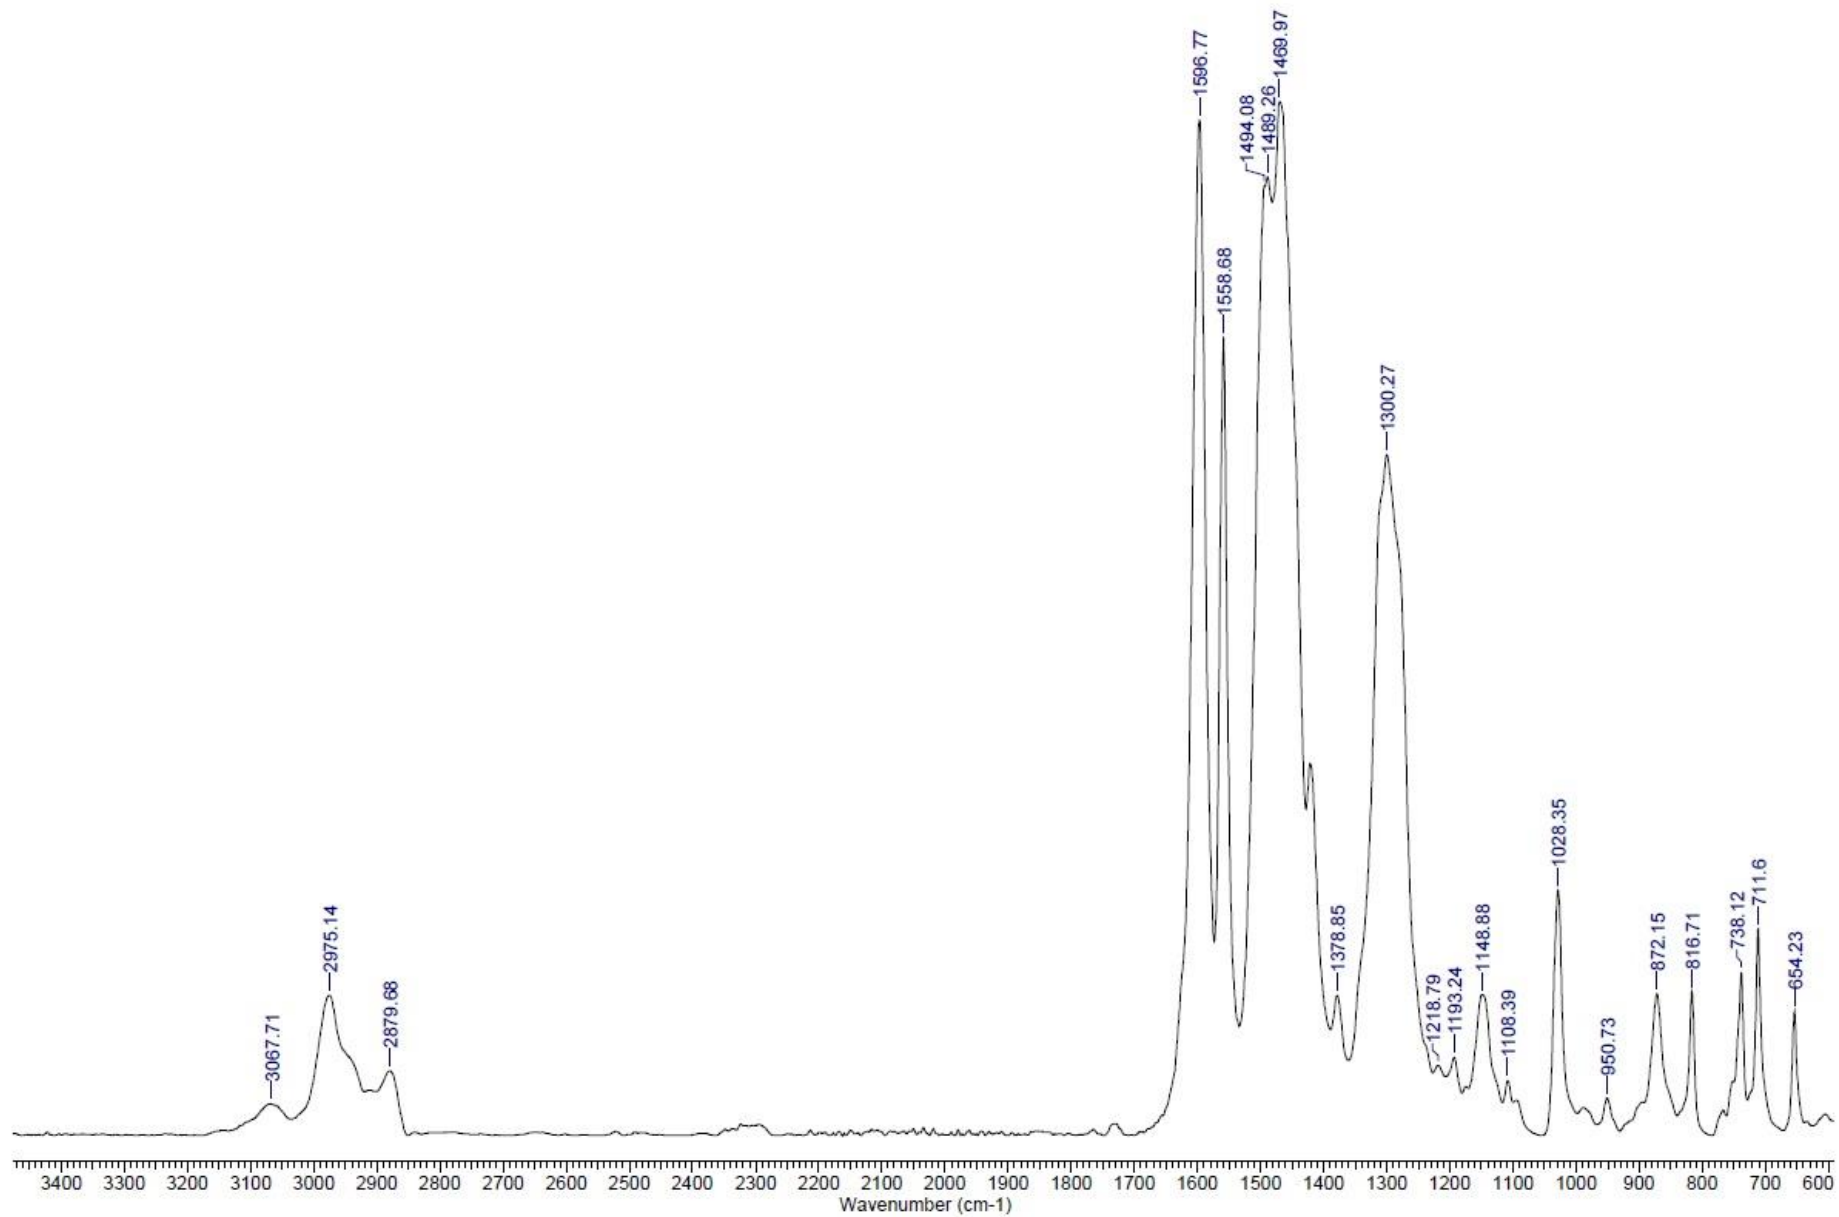

**Figure S28.** Solid-state IR spectra of complex **L3\*Eu(NO<sub>3</sub>)<sub>3</sub>**

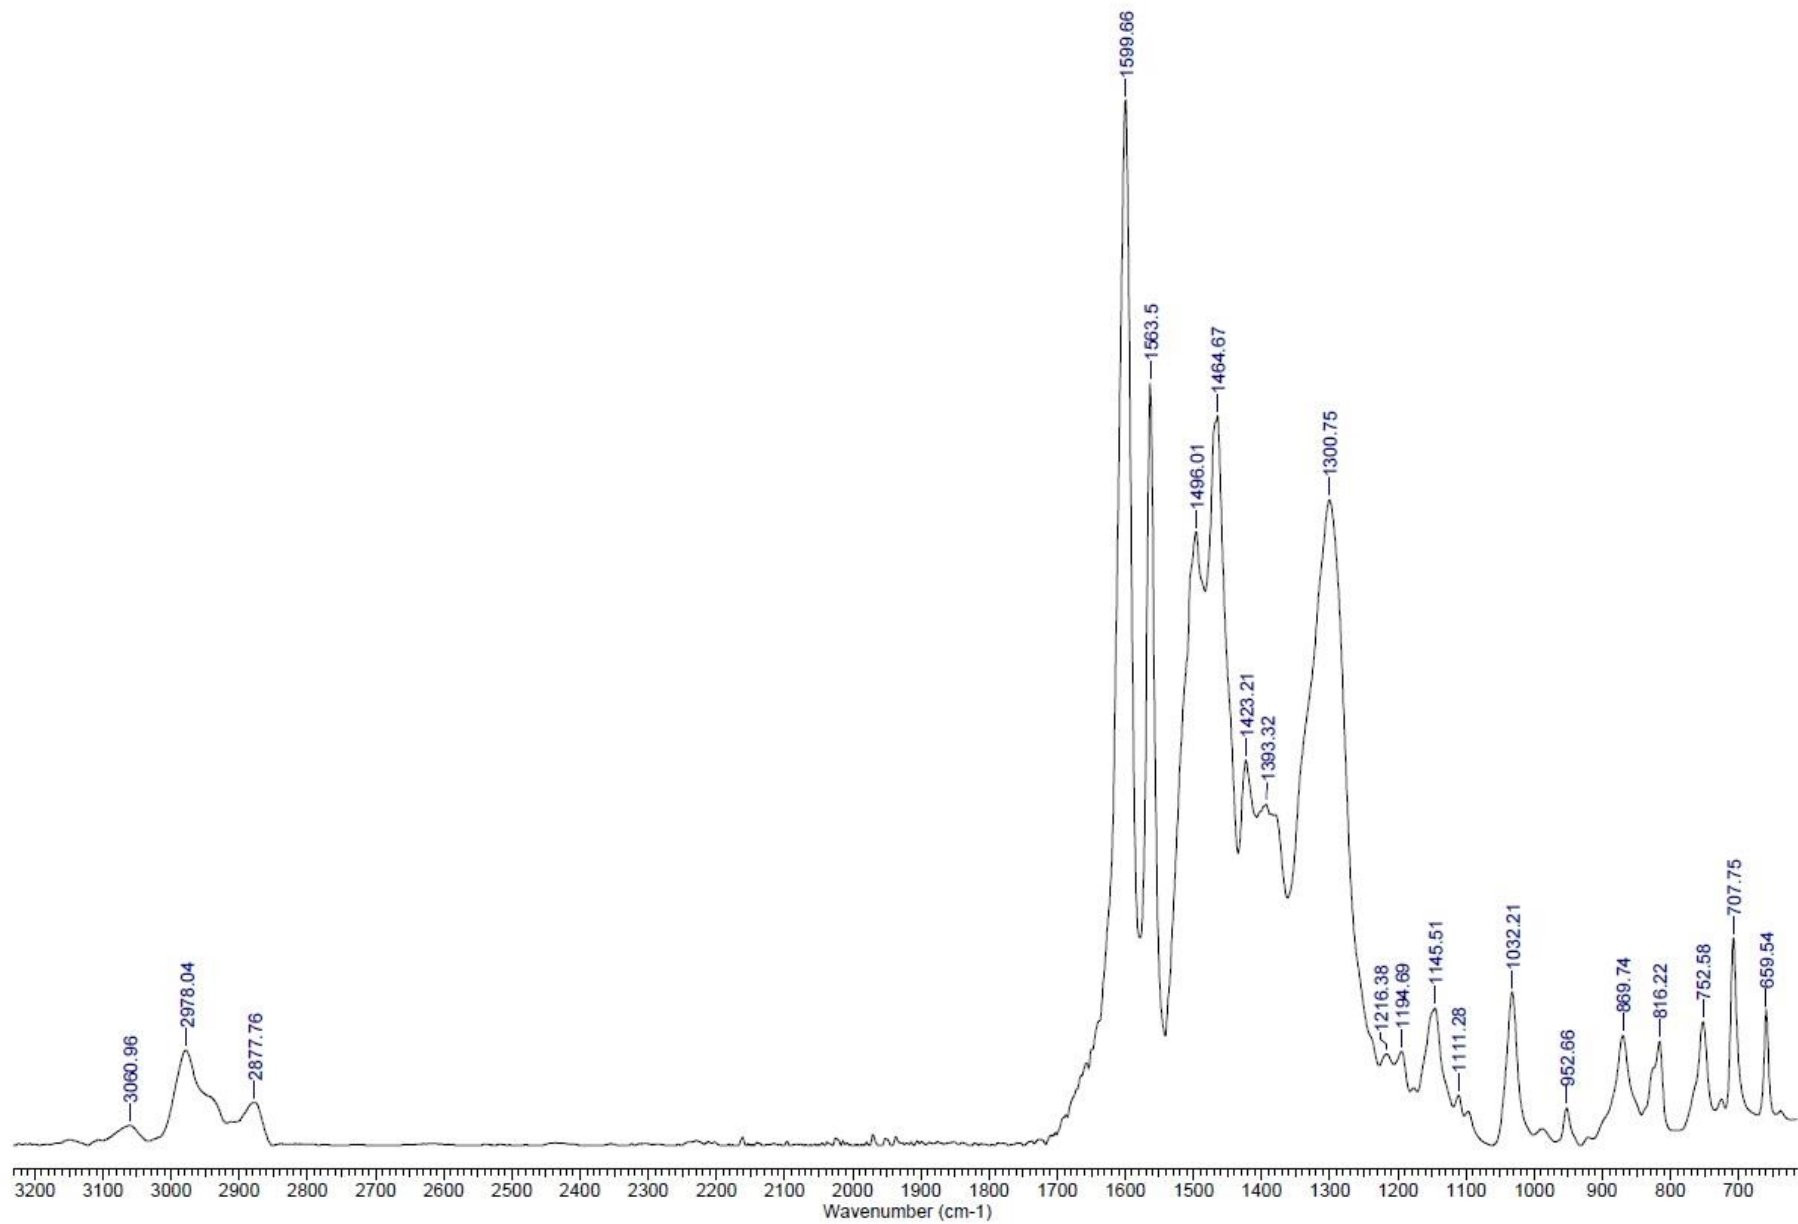

**Figure S29.** Solid-state IR spectra of complex **L3\*Lu(NO<sub>3</sub>)<sub>3</sub>**

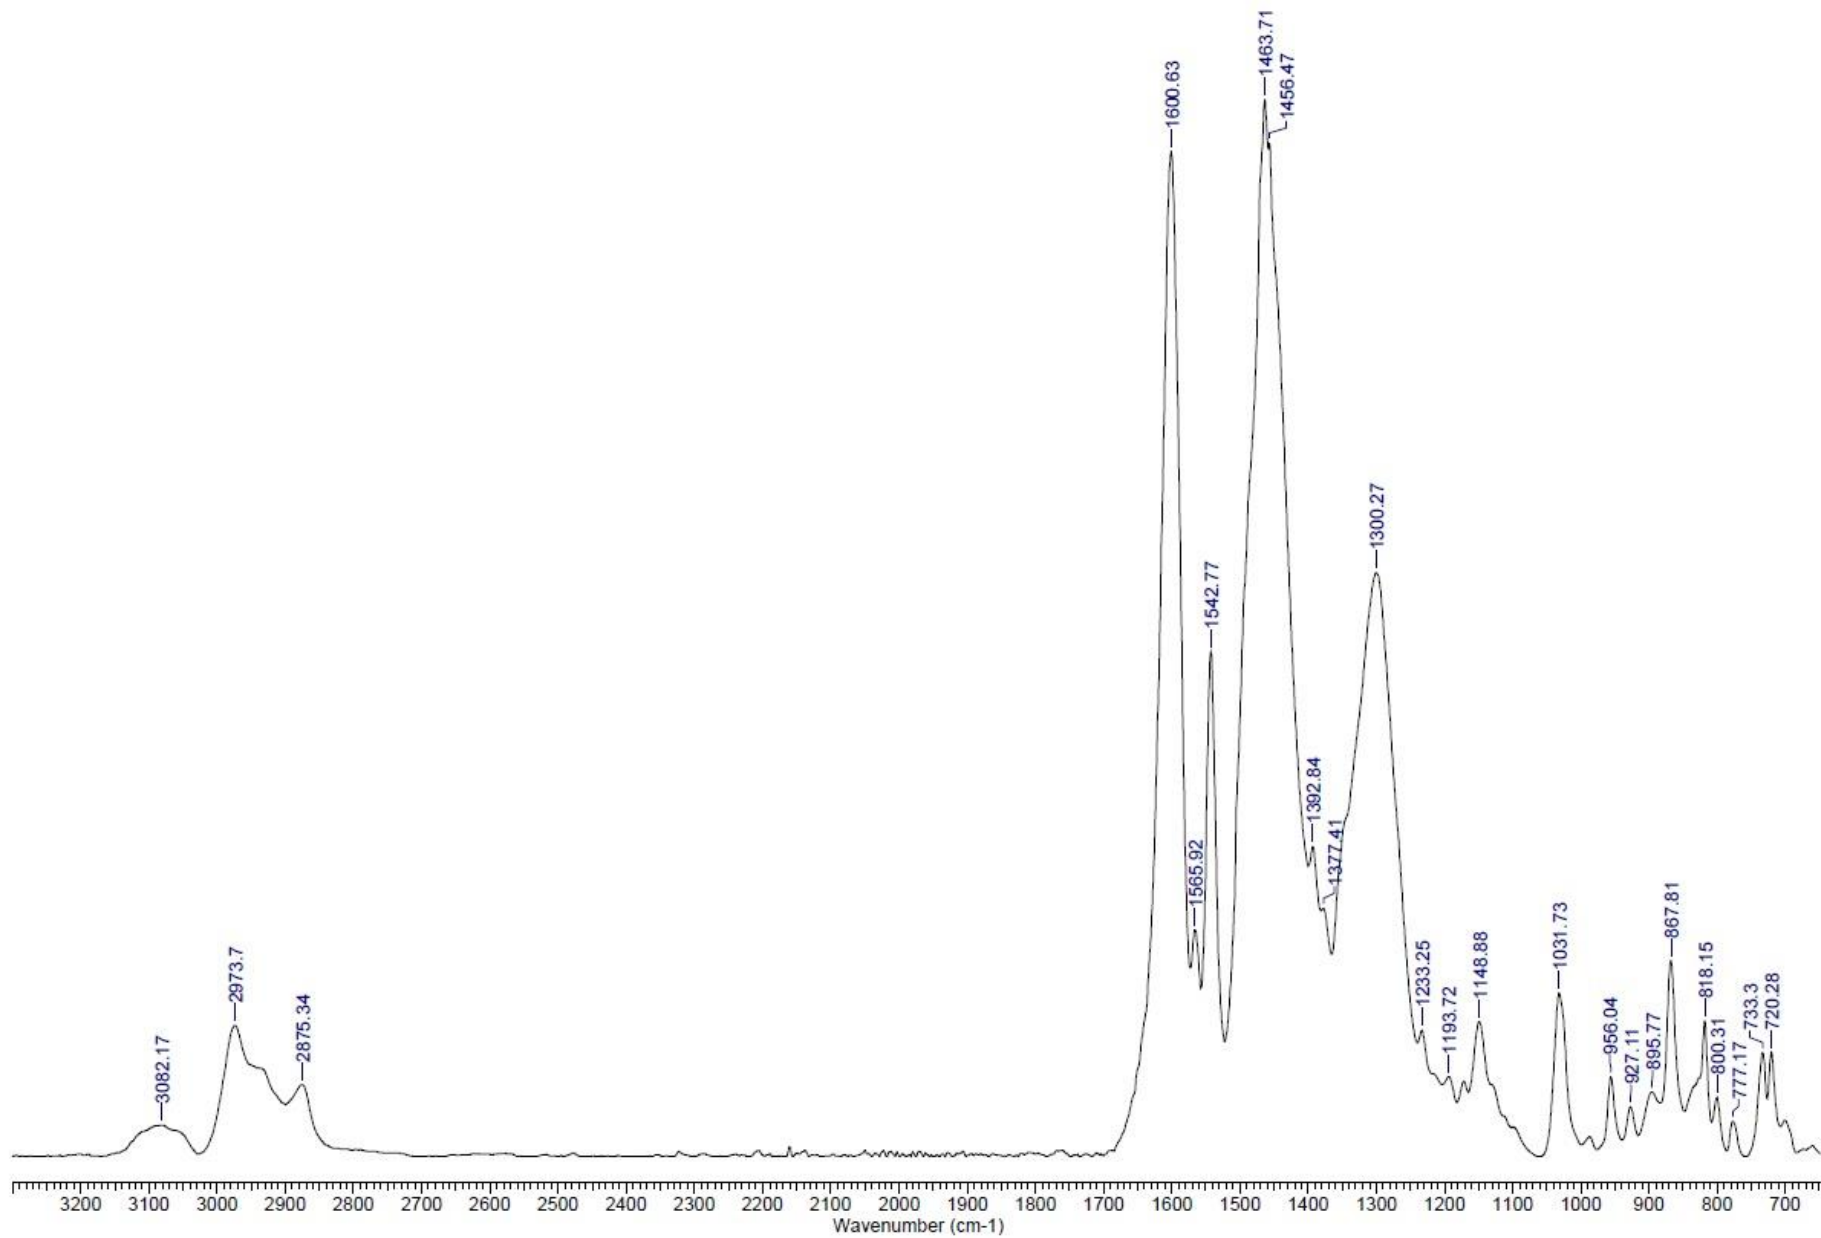

**Figure S30.** Solid-state IR spectra of complex **L4\*La(NO<sub>3</sub>)<sub>3</sub>**

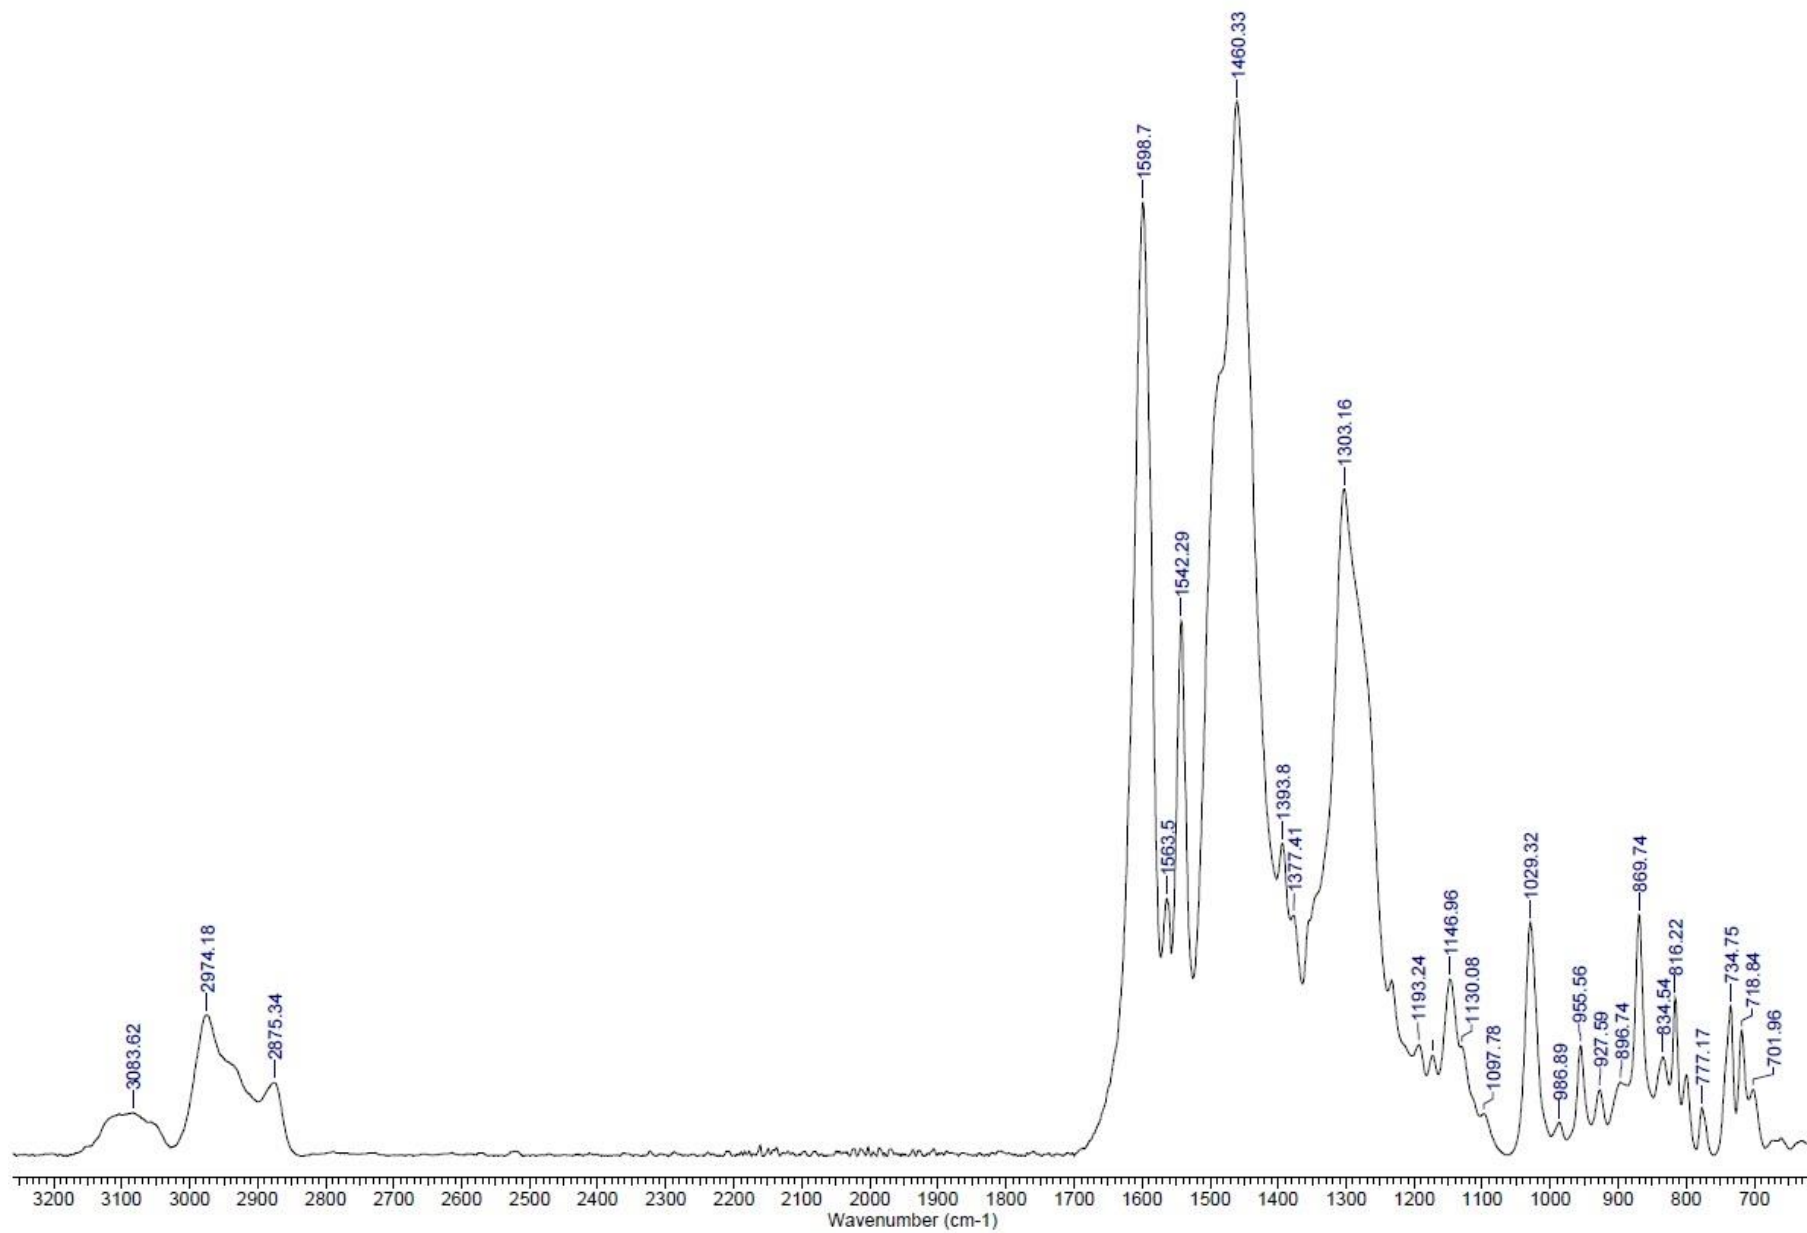

**Figure S31.** Solid-state IR spectra of complex **L4\*Nd(NO<sub>3</sub>)<sub>3</sub>**

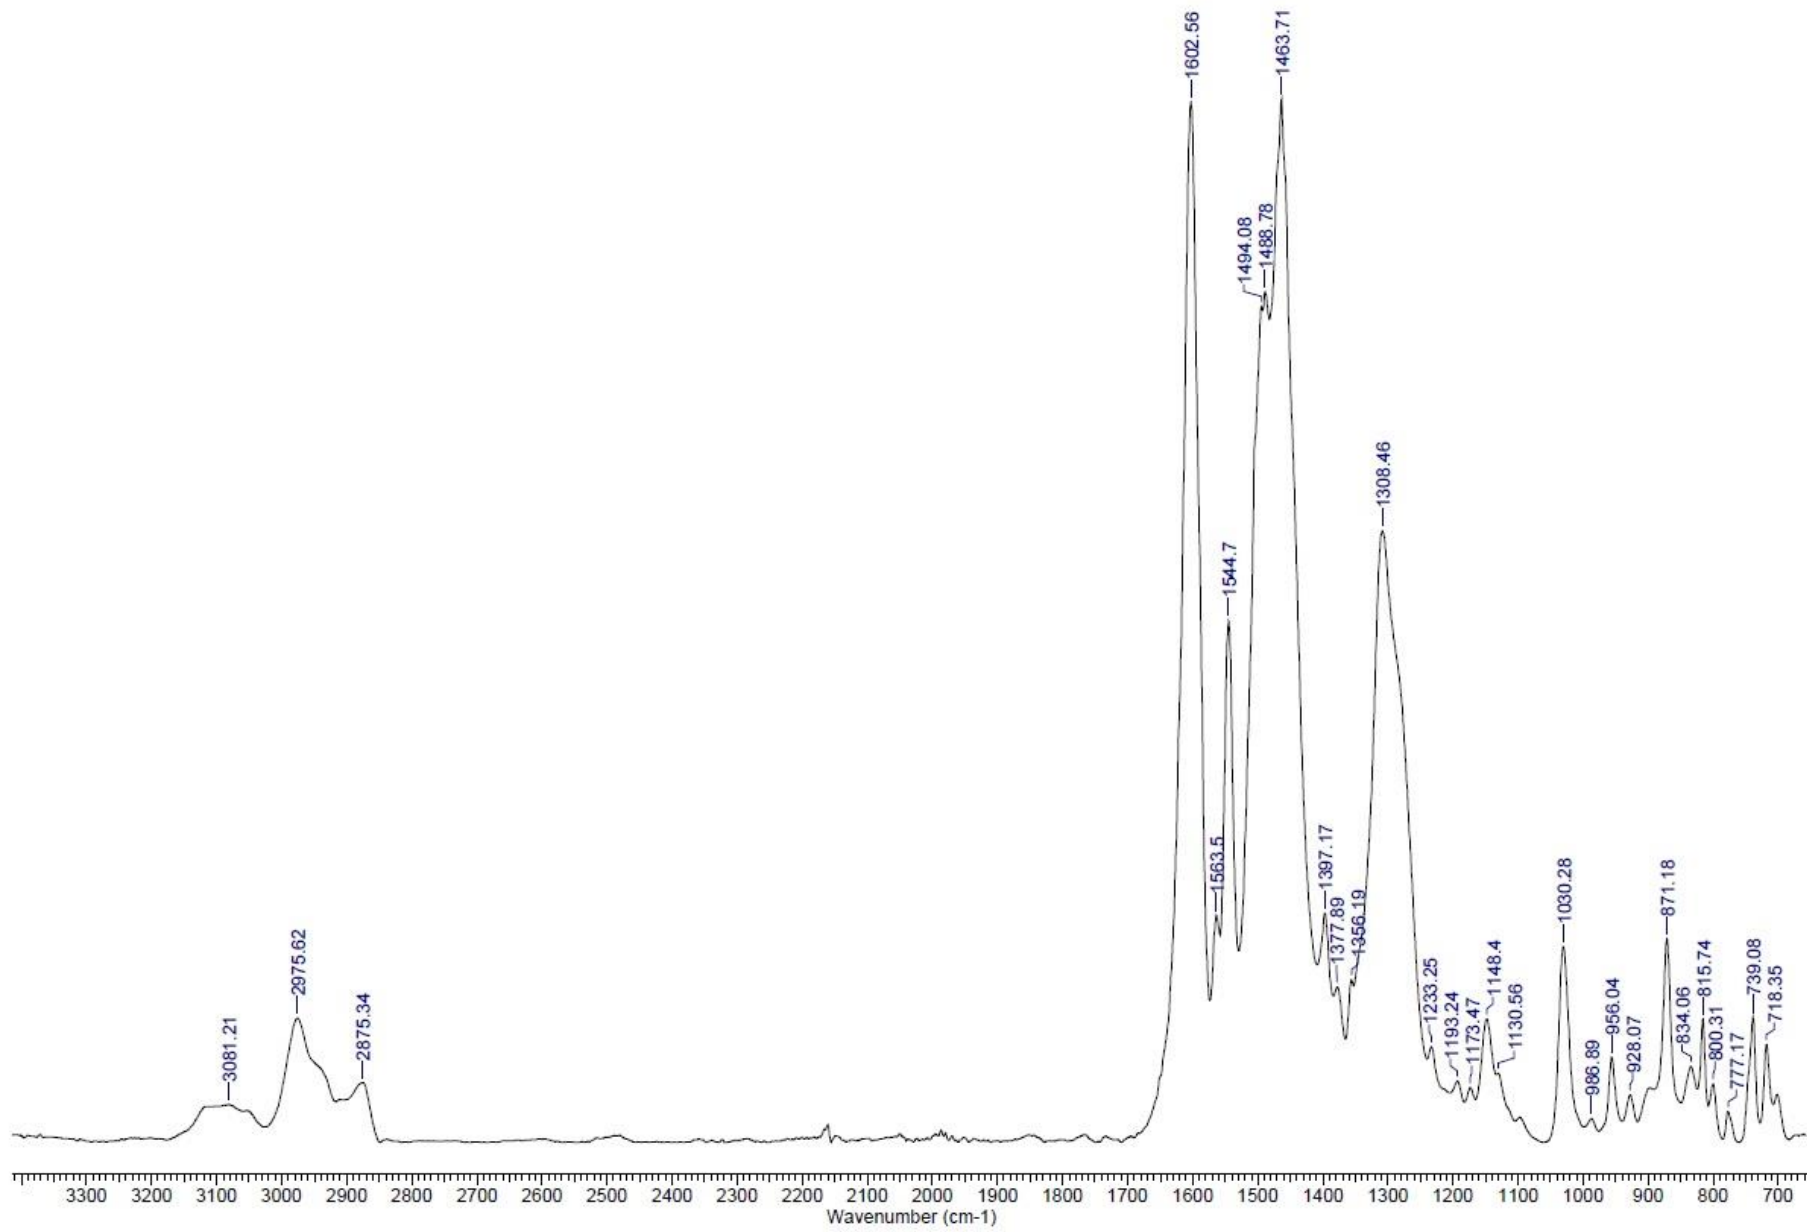

Figure S32. Solid-state IR spectra of complex L4\*Eu(NO<sub>3</sub>)<sub>3</sub>

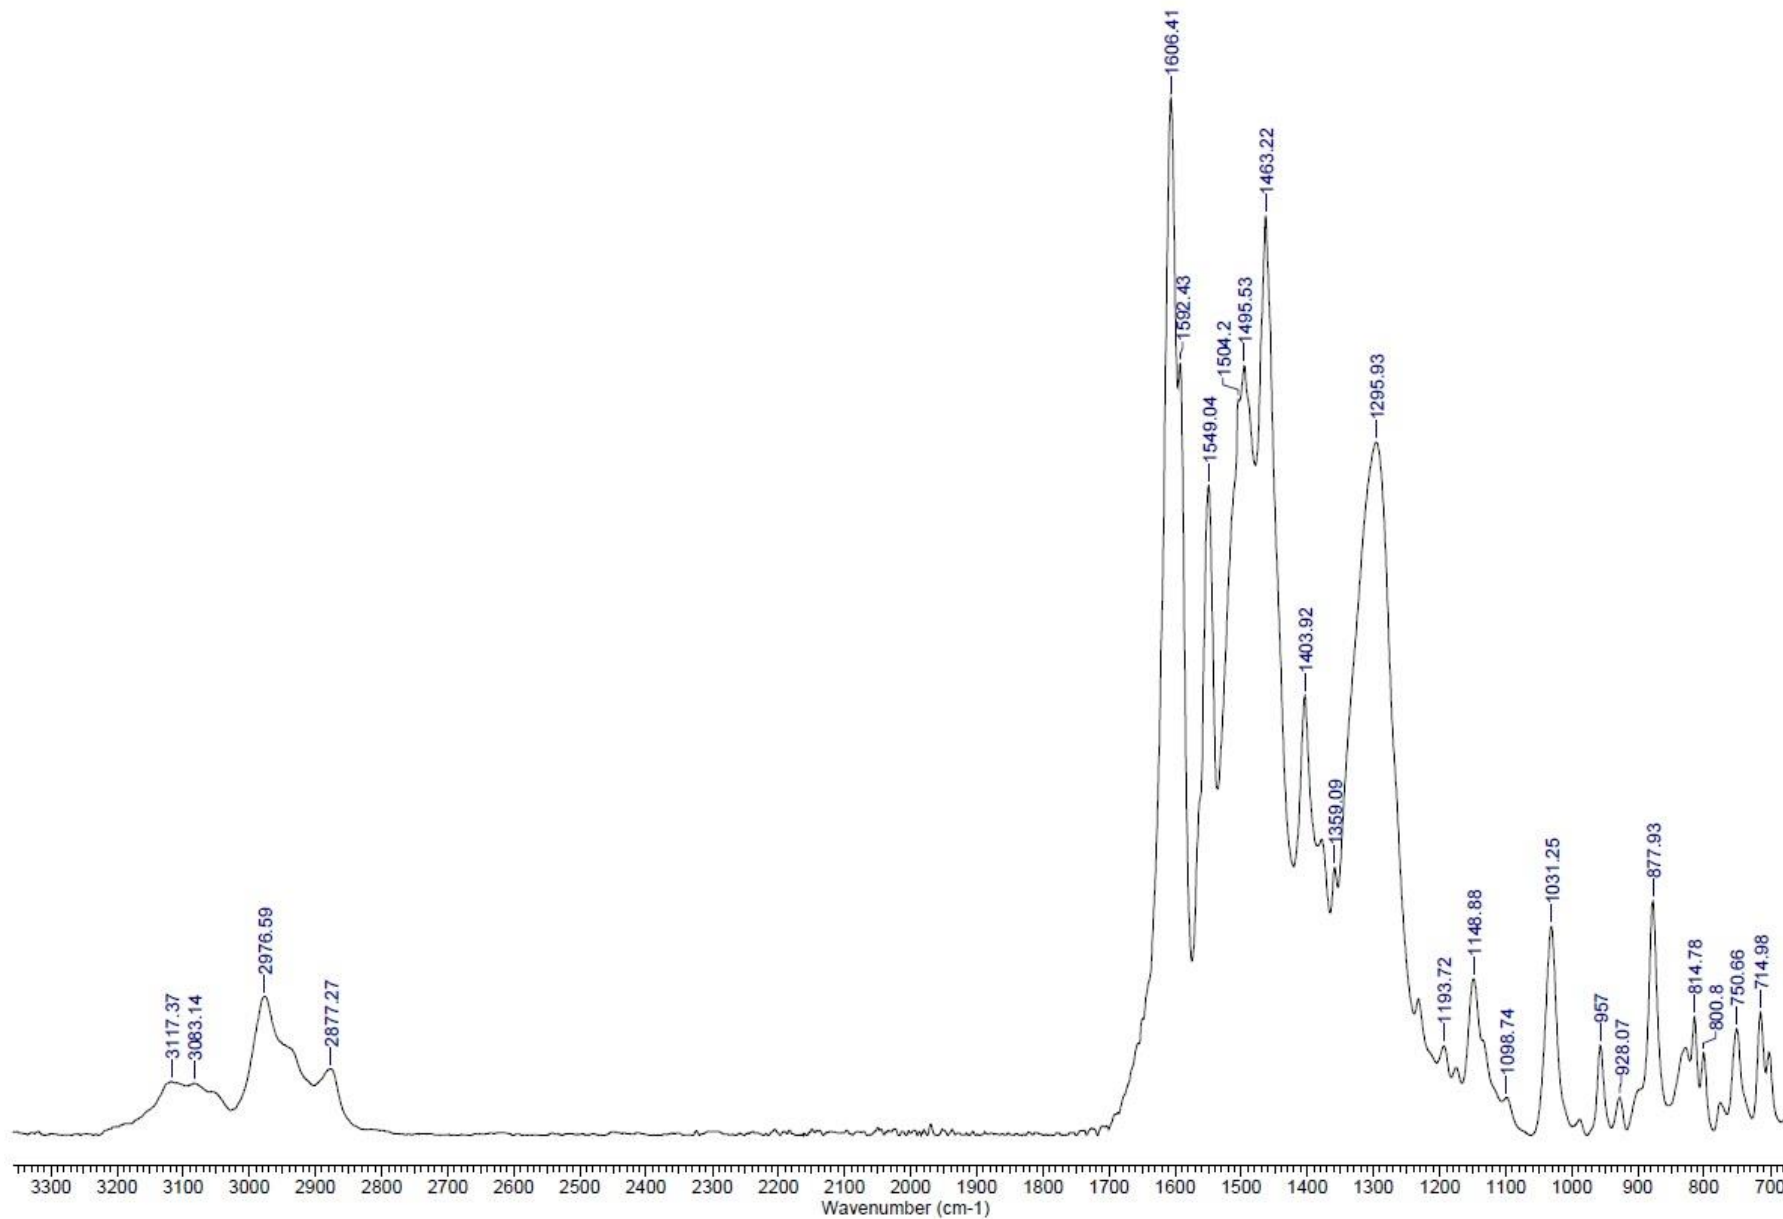

**Figure S33.** Solid-state IR spectra of complex **L4\*Lu(NO<sub>3</sub>)<sub>3</sub>**

### 3 X-ray diffraction data

**Table S1.** Crystal data and structure refinement parameters for **L1**, **L3**, **L4**, **L3\*Nd(NO<sub>3</sub>)<sub>3</sub>** and **L4\*Nd(NO<sub>3</sub>)<sub>3</sub>**

|                                                            | <b>L1</b>                                                     | <b>L3</b>                                                     | <b>L4</b>                                                                     | <b>L3*Nd(NO<sub>3</sub>)<sub>3</sub></b>                         | <b>L4*Nd(NO<sub>3</sub>)<sub>3</sub></b>                                         |
|------------------------------------------------------------|---------------------------------------------------------------|---------------------------------------------------------------|-------------------------------------------------------------------------------|------------------------------------------------------------------|----------------------------------------------------------------------------------|
| Empirical formula                                          | C <sub>22</sub> H <sub>22</sub> N <sub>4</sub> O <sub>2</sub> | C <sub>24</sub> H <sub>26</sub> N <sub>4</sub> O <sub>2</sub> | C <sub>24</sub> H <sub>24</sub> Cl <sub>2</sub> N <sub>4</sub> O <sub>2</sub> | C <sub>24</sub> H <sub>26</sub> N <sub>7</sub> NdO <sub>11</sub> | C <sub>28</sub> H <sub>30</sub> Cl <sub>2</sub> N <sub>9</sub> NdO <sub>11</sub> |
| Formula weight                                             | 374.3                                                         | 402.49                                                        | 471.37                                                                        | 732.76                                                           | 883.75                                                                           |
| T, K                                                       | 120                                                           | 120                                                           | 120                                                                           | 100                                                              | 100                                                                              |
| Crystal system                                             | Monoclinic                                                    | Orthorhombic                                                  | Orthorhombic                                                                  | Monoclinic                                                       | Monoclinic                                                                       |
| Space group                                                | P2 <sub>1</sub> /c                                            | P2 <sub>1</sub> 2 <sub>1</sub> 2 <sub>1</sub>                 | P2 <sub>1</sub> 2 <sub>1</sub> 2 <sub>1</sub>                                 | P2 <sub>1</sub> /n                                               | P2 <sub>1</sub> /c                                                               |
| Z                                                          | 8                                                             | 4                                                             | 4                                                                             | 4                                                                | 8                                                                                |
| a, Å                                                       | 7.5010(9)                                                     | 8.6426(8)                                                     | 9.326(3)                                                                      | 9.3150(4)                                                        | 21.8774(4)                                                                       |
| b, Å                                                       | 22.943(3)                                                     | 10.6697(10)                                                   | 10.620(3)                                                                     | 17.7540(7)                                                       | 17.5953(3)                                                                       |
| c, Å                                                       | 21.104(2)                                                     | 22.304(2)                                                     | 22.479(6)                                                                     | 16.6429                                                          | 19.4525(3)                                                                       |
| α/°                                                        | 90                                                            | 90                                                            | 90                                                                            | 90                                                               | 90                                                                               |
| β/°                                                        | 92.869(3)                                                     | 90                                                            | 90                                                                            | 100.3520(10)                                                     | 113.0550(10)                                                                     |
| γ/°                                                        | 90                                                            | 90                                                            | 90                                                                            | 90                                                               | 90                                                                               |
| V, Å <sup>3</sup>                                          | 3627.3(7)                                                     | 2056.8(3)                                                     | 2226.3                                                                        | 2707.58(19)                                                      | 6890.0(2)                                                                        |
| D <sub>calc</sub> (g cm <sup>-3</sup> )                    | 1.373                                                         | 1.300                                                         | 1.406                                                                         | 1.798                                                            | 1.704                                                                            |
| Linear absorption, μ (cm <sup>-1</sup> )                   | 0.90                                                          | 0.85                                                          | 3.22                                                                          | 19.92                                                            | 17.34                                                                            |
| F(000)                                                     | 1584                                                          | 856                                                           | 984                                                                           | 1468                                                             | 3544                                                                             |
| 2θ <sub>max</sub> , °                                      | 62                                                            | 56                                                            | 54                                                                            | 56                                                               | 56                                                                               |
| Reflections measured                                       | 49775                                                         | 23524                                                         | 14213                                                                         | 29857                                                            | 84838                                                                            |
| Independent reflections                                    | 11093                                                         | 4976                                                          | 4855                                                                          | 6523                                                             | 16627                                                                            |
| Observed reflections [I > 2σ(I)]                           | 6670                                                          | 3898                                                          | 2397                                                                          | 5760                                                             | 13227                                                                            |
| Parameters                                                 | 512                                                           | 291                                                           | 326                                                                           | 420                                                              | 927                                                                              |
| R1                                                         | 0.0584                                                        | 0.0538                                                        | 0.0639                                                                        | 0.0657                                                           | 0.0409                                                                           |
| wR2                                                        | 0.1428                                                        | 0.1262                                                        | 0.1594                                                                        | 0.1403                                                           | 0.1100                                                                           |
| GOF                                                        | 1.009                                                         | 1.032                                                         | 1.003                                                                         | 1.240                                                            | 0.940                                                                            |
| Δρ <sub>max</sub> / Δρ <sub>min</sub> (e Å <sup>-3</sup> ) | 0.364/-0.365                                                  | 0.432/-0.249                                                  | 0.268/-0.344                                                                  | 1.949/-2.344                                                     | 1.300/-0.911                                                                     |

## 4 Spectrophotometric titration data

### Ligand L1

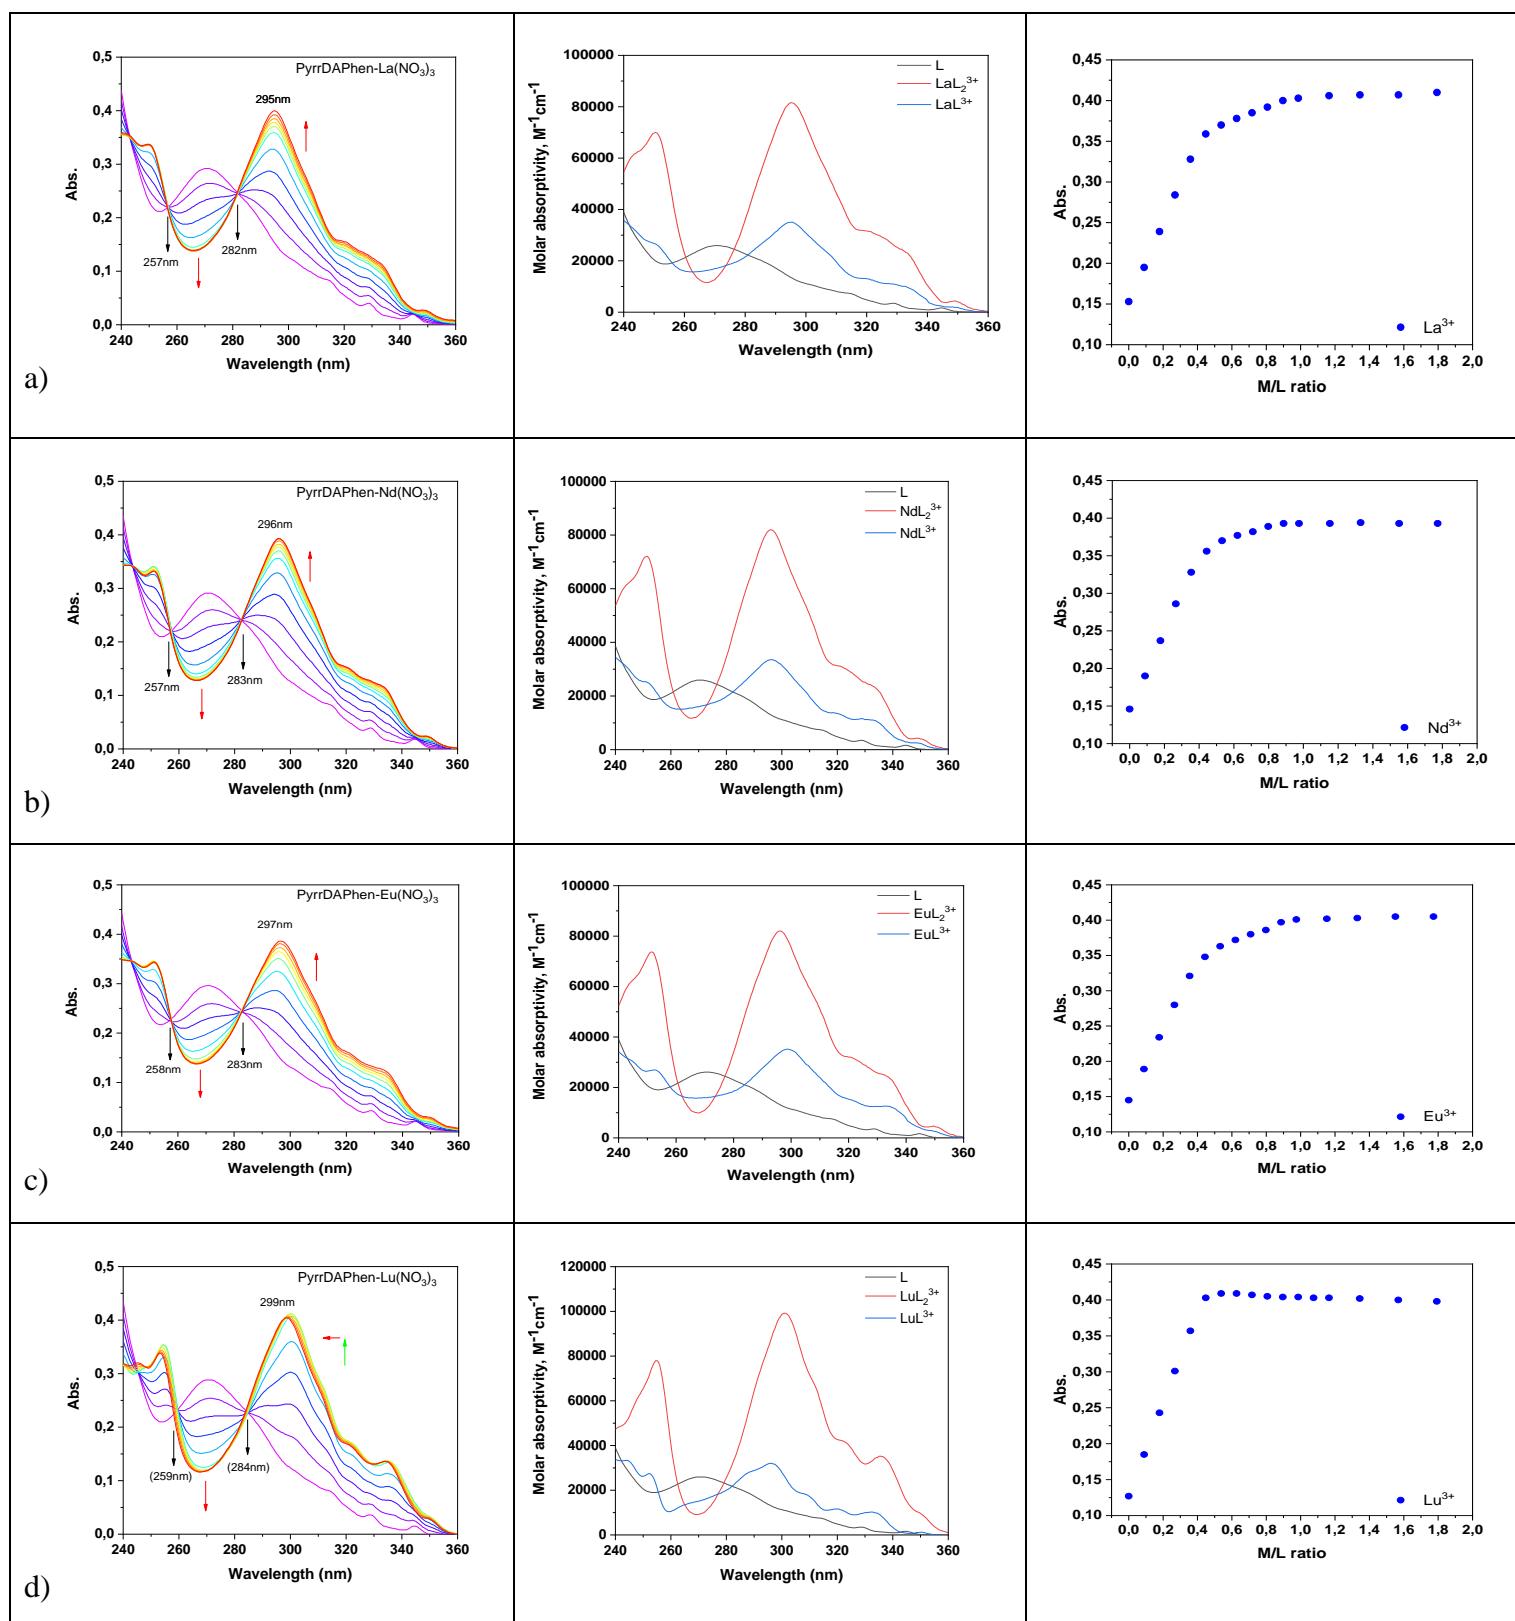

**Figure S34.** Spectrophotometric titration of **PyrrDAPhen (1)** (ca.  $10^{-5}$  mol/L) with a) La<sup>3+</sup>, b) Nd<sup>3+</sup>, c) Eu<sup>3+</sup> and d) Lu<sup>3+</sup> ions (ca.  $10^{-3}$  mol/L) in CH<sub>3</sub>CN solution ( $T = 25.0 \pm 0.1$  °C,  $I = 0$  M,  $V_0 = 2.0$  mL). Left: absorption spectra, middle: the molar absorptivities of free ligand **1** and Ln(III) complexes calculated from spectral deconvolution, right: titration curve at maximum absorption wavelength.



## Ligand L2

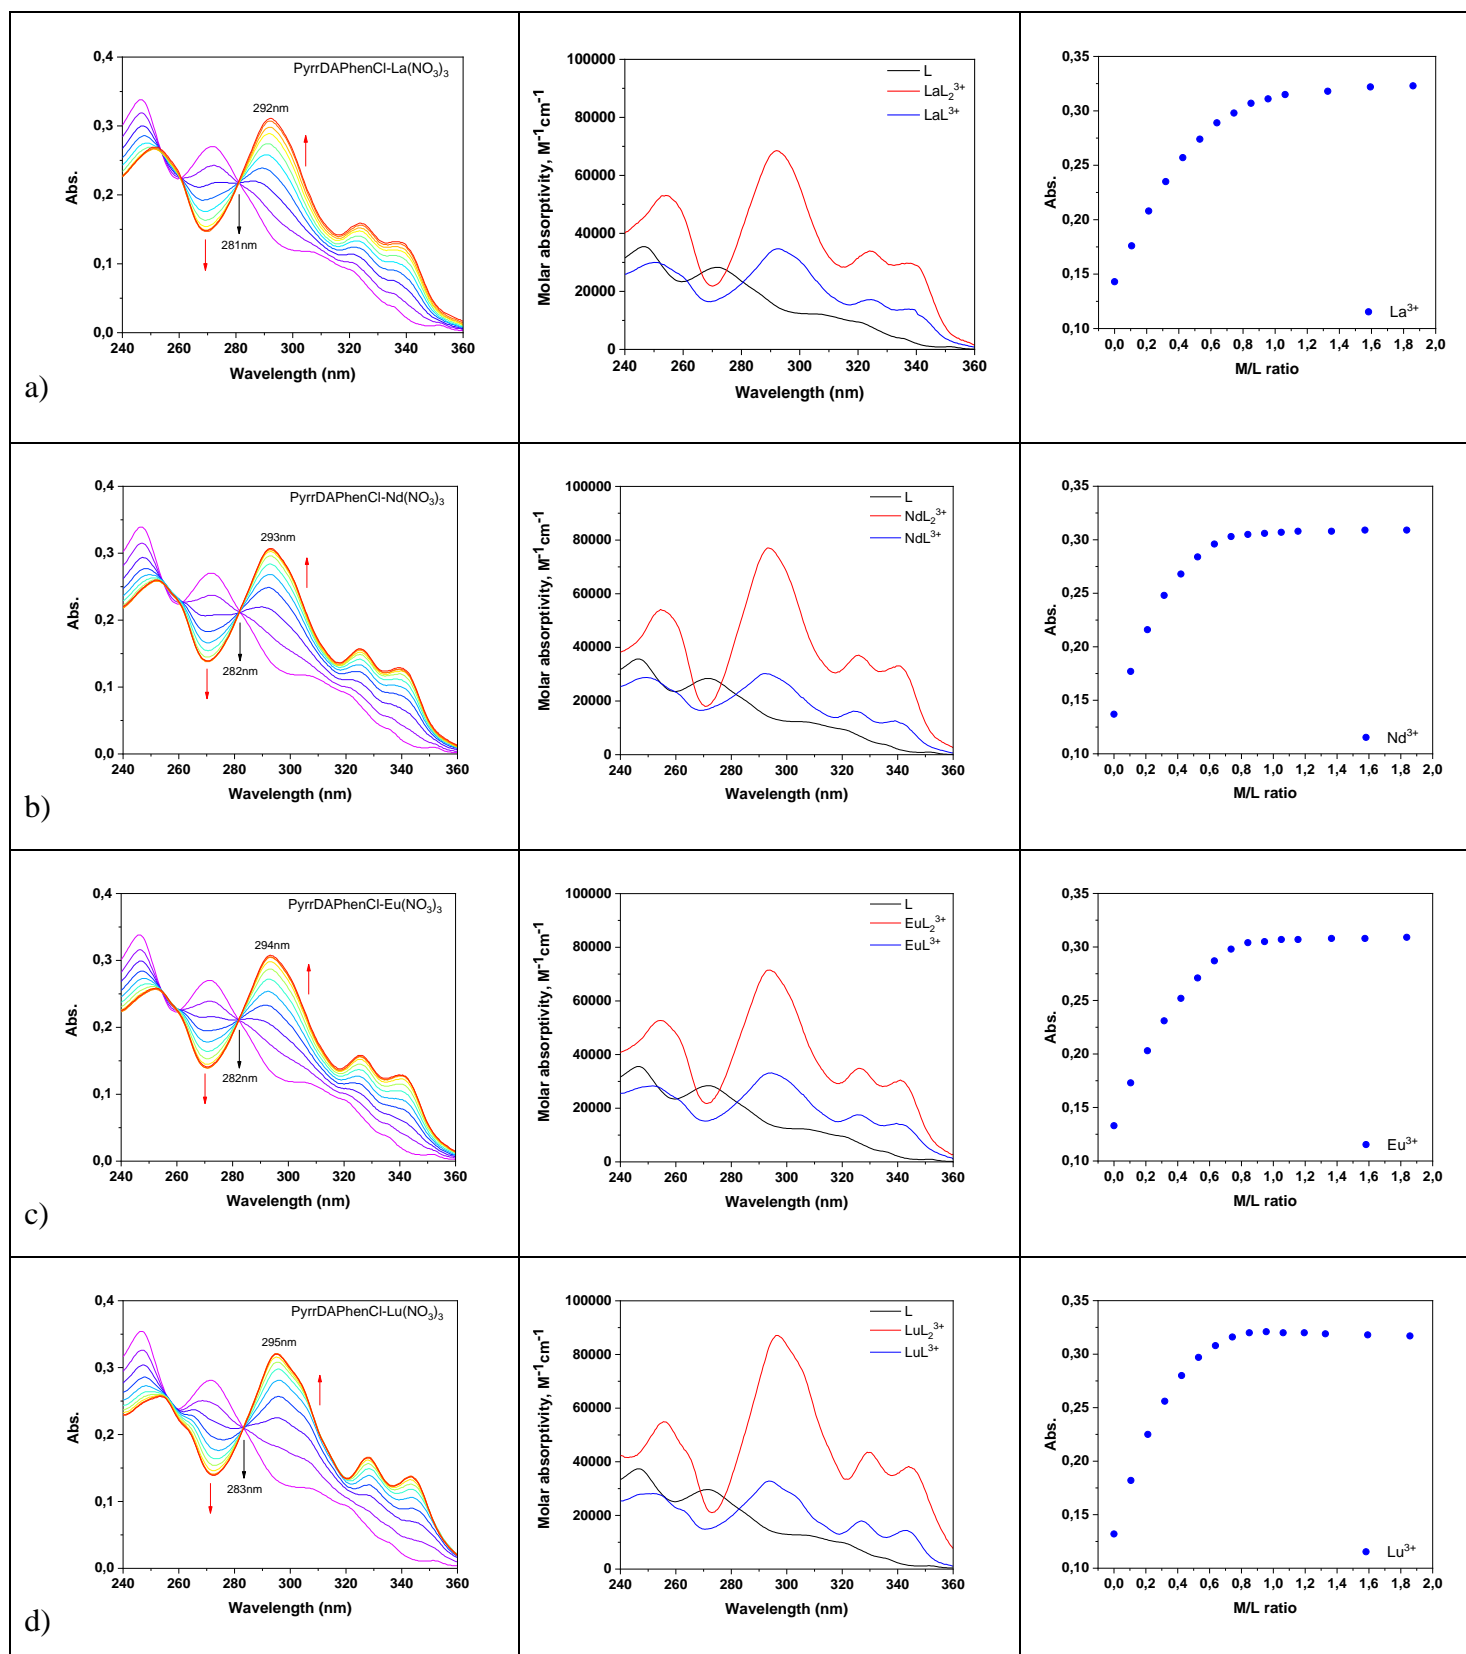

**Figure S35.** Spectrophotometric titration of **PyrrDAPhenCl (2)** (ca.  $10^{-5}$  mol/L) with a)  $\text{La}^{3+}$ , b)  $\text{Nd}^{3+}$ , c)  $\text{Eu}^{3+}$  and d)  $\text{Lu}^{3+}$  ions (ca.  $10^{-3}$  mol/L) in  $\text{CH}_3\text{CN}$  solution ( $T = 25.0 \pm 0.1$  °C,  $I = 0$  M,  $V_0 = 2.0$  mL). Left: absorption spectra, middle: the molar absorptivities of free ligand **2** and  $\text{Ln}(\text{III})$  complexes calculated from spectral deconvolution, right: titration curve at maximum absorption wavelength.

## Ligand L3

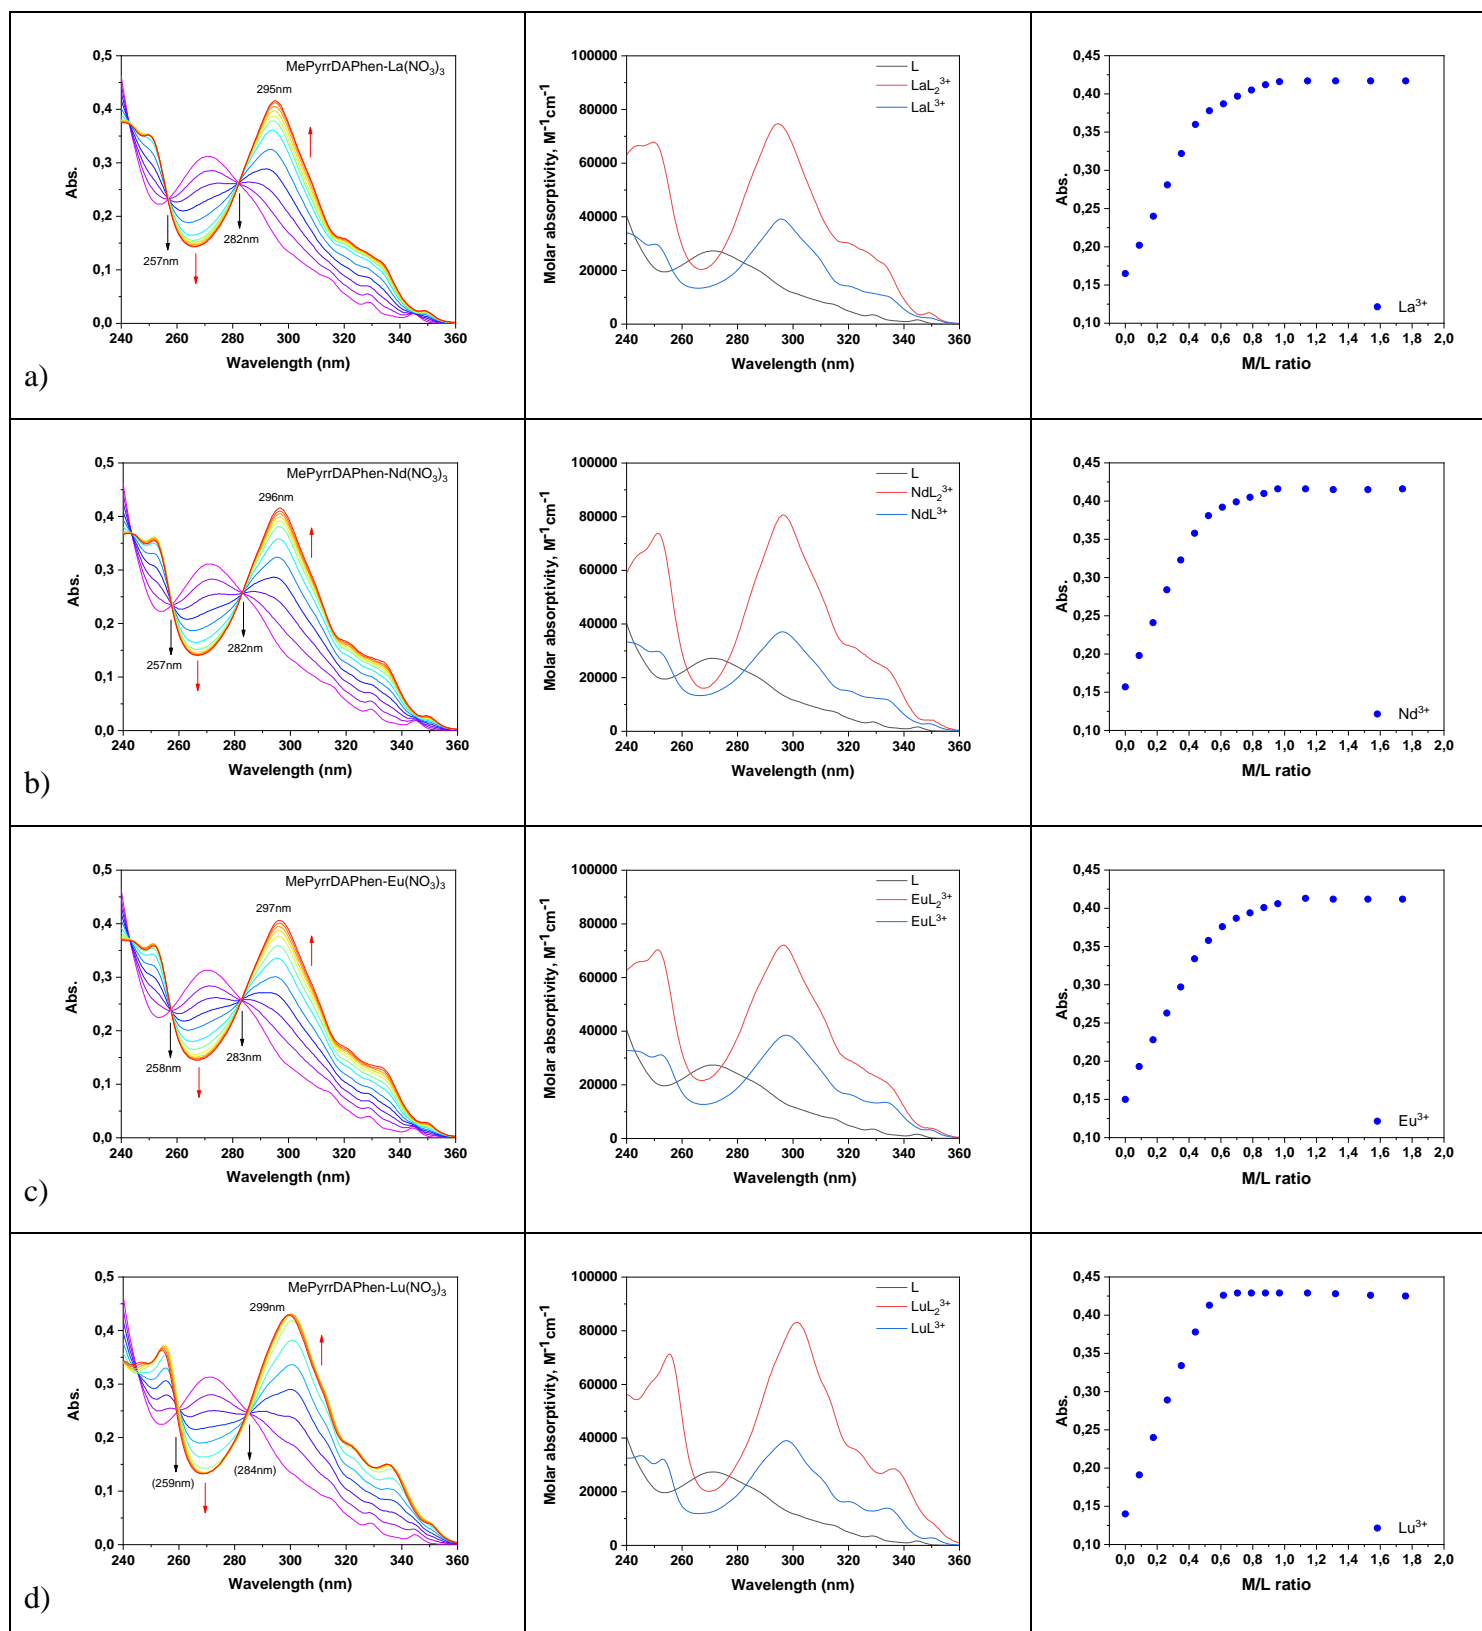

**Figure S36.** Spectrophotometric titration of L3 (ca.  $10^{-5}$  mol/L) with a) La<sup>3+</sup>, b) Nd<sup>3+</sup>, c) Eu<sup>3+</sup> and d) Lu<sup>3+</sup> ions (ca.  $10^{-3}$  mol/L) in CH<sub>3</sub>CN solution ( $T = 25.0 \pm 0.1$  °C,  $I = 0$  M,  $V_0 = 2.0$  mL). Left: absorption spectra, middle: the molar absorptivities of free ligand L3 and Ln(III) complexes calculated from spectral deconvolution, right: titration curve at maximum absorption wavelength.

## Ligand L4

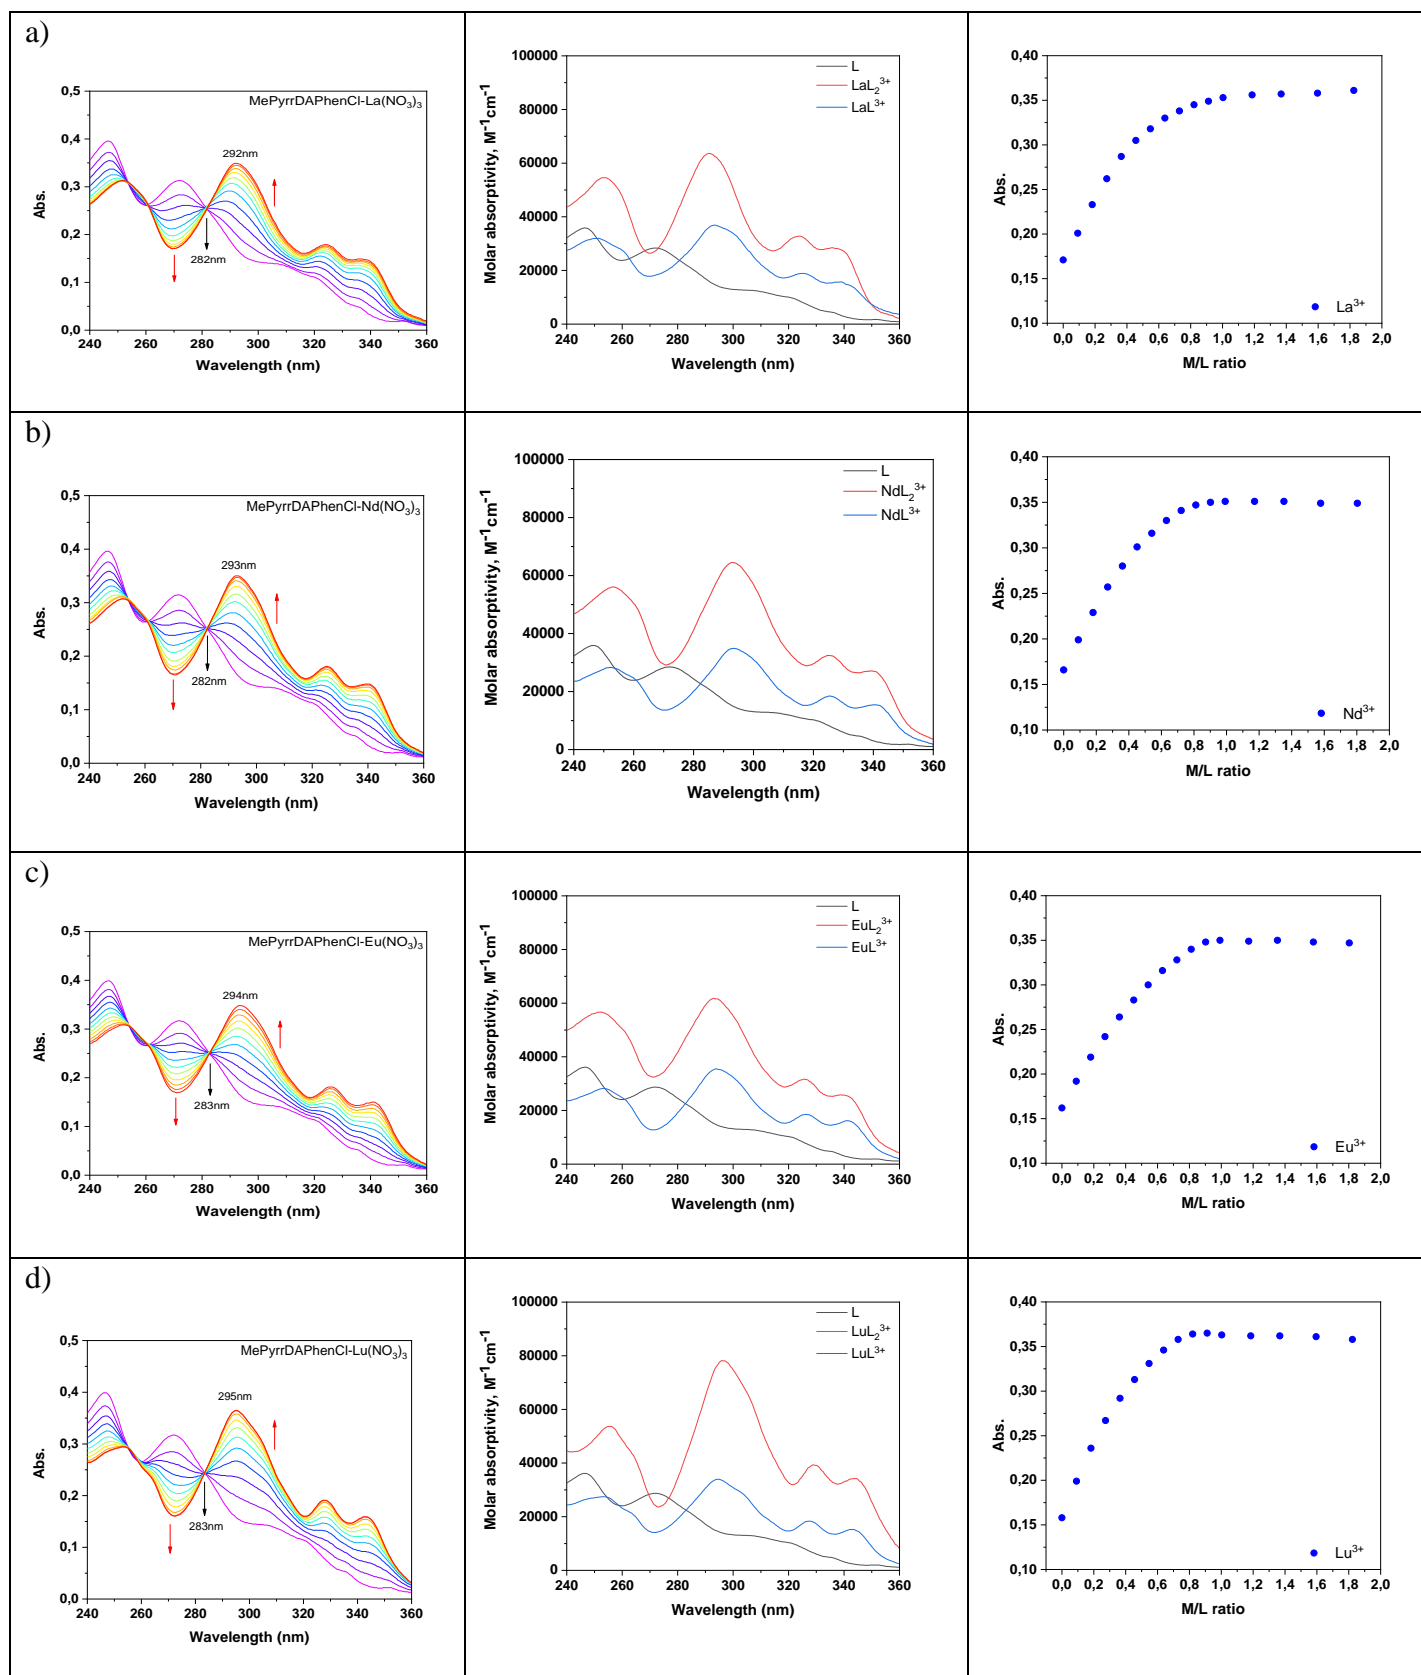

**Figure S37.** Spectrophotometric titration of **L4** (ca.  $10^{-5}$  mol/L) with a)  $\text{La}^{3+}$ , b)  $\text{Nd}^{3+}$ , c)  $\text{Eu}^{3+}$  and d)  $\text{Lu}^{3+}$  ions (ca.  $10^{-3}$  mol/L) in  $\text{CH}_3\text{CN}$  solution ( $T = 25.0 \pm 0.1$  °C,  $I = 0$  M,  $V_0 = 2.0$  mL). Left: absorption spectra, middle: the molar absorptivities of free ligand **L4** and Ln(III) complexes calculated from spectral deconvolution, right: titration curve at maximum absorption wavelength.

## 5 Solvent Extraction Kinetics and Solvation numbers

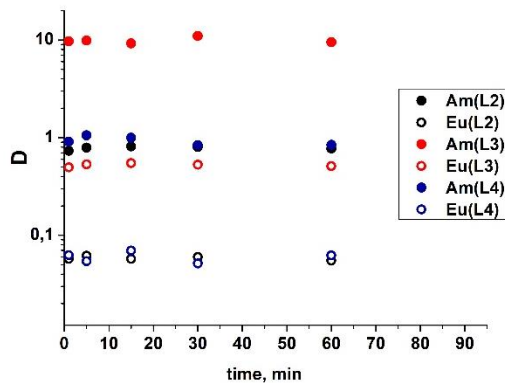

**Figure S38.** Dependence of the distribution coefficients of Am and Eu on the phase contact time during extraction of 0.012M PyrrDAPhenCl (**L2**), 0.04M MePyrrDAPhen (**L3**), 0.02M MePyrrDAPhenCl (**L4**) from 3M HNO<sub>3</sub>

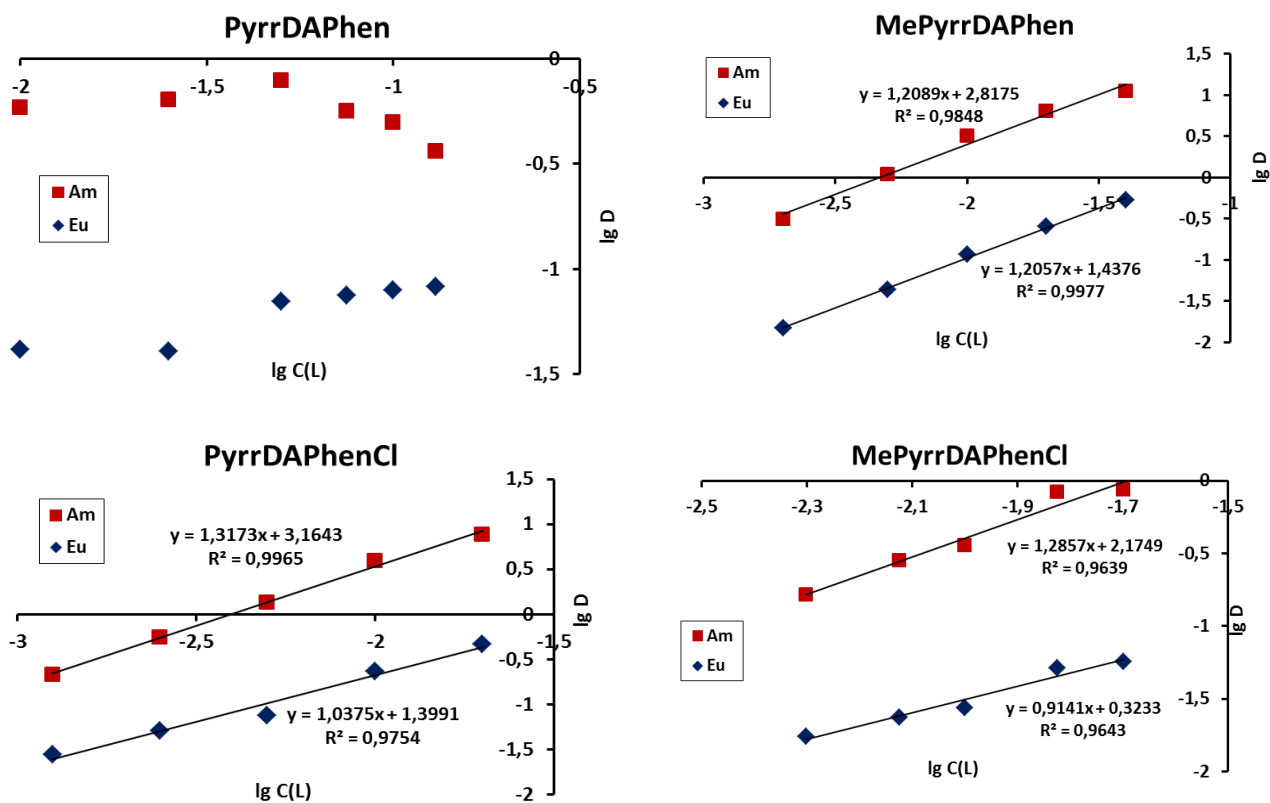

**Figure S39.** Dependence of the Am/Eu distribution coefficients on the ligand concentration during the extraction of PyrrDAPhen (**L1**), MePyrrDAPhen (**L3**), MePyrrDAPhenCl (**L4**) from 3M HNO<sub>3</sub> and PyrrDAPhenCl (**L2**) from 5M HNO<sub>3</sub>.

## 6. Theoretical computations

All structures were optimized at the DFT level in the gas phase (tolerance on gradient:  $10^{-7}$  au).<sup>7</sup> We used quantum chemical software PRIODA-19 developed by Laikov<sup>8</sup> to evaluate quantum chemical calculations. The generalized gradient approximation (GGA) functional PBE was used for the geometry optimization and frequency calculations of all structures as reported in our previous work<sup>9</sup>. All stationary points on the potential energy surface (PES) were checked by vibrational analysis and none of them had imaginary frequencies. For La complexes with ligands **L1-L4**, we used hybrid functional PBE0 containing 25% of exchange HF energy to test the stability of the solution. Full electron relativistic L1 basis set<sup>10</sup> of TZ quality including one polarization function was used for all the atoms to provide the most reliable result. For complexes of NdIII and EuIII the highest spin 4 and 7 respectively were chosen according (2S+1) rule. To make ESP maps for ligand we used Gaussian 1630 at B3LYP/6-31G(d,p) theoretical level. B3LYP is used as an universal, time-saving functional for making ESP maps<sup>9</sup>, 6-31G(d,p) was chosen as a standard basis set.

We used eq. (1) as a model reaction of complex formation.

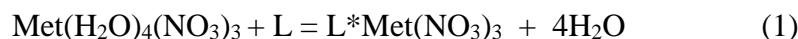

The energy of complex formation in gas phase was calculated according to eq. (2).

$$\Delta E = E_{4\text{H}_2\text{O}} + E_{\text{L}^*\text{Met}(\text{NO}_3)_3} - E_{\text{Met}(\text{H}_2\text{O})_4(\text{NO}_3)_3} - E_{\text{L}} \quad (2)$$

where  $E_{4\text{H}_2\text{O}}$ ,  $E_{\text{L}^*\text{Met}(\text{NO}_3)_3}$ ,  $E_{\text{Met}(\text{H}_2\text{O})_4(\text{NO}_3)_3}$ ,  $E_{\text{L}}$  are energies for optimized geometrical structures of  $4\text{H}_2\text{O}$ ,  $[\text{Met}(\text{NO}_2)_3]\text{L}$ ,  $\text{Met}_3(\text{NO}_2)_3$ , L respectively.

The preorganization energy of a ligand in a complex was calculated as difference between the energy of a ligand in a complex and the energy of the main conformer of the ligand. The energy of a ligand in a complex was calculated by removing  $\text{Ln}(\text{NO}_3)_3$  in the structure of the complex and further calculating the energy of obtained geometry of the ligand.

Since **L3** and **L4** ligands possess stereoisomerism, we took these effects into account when modeling their complexes with  $\text{La}(\text{NO}_3)_3$ . Figure S40 shows the possible positions of Me in the **L3\*La(NO<sub>3</sub>)<sub>3</sub>** complex.

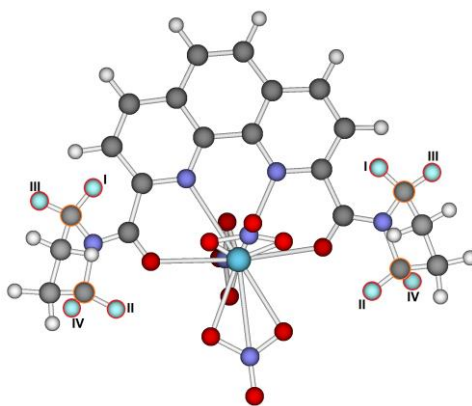

**Figure S40.** Possible positions of Me in the complex **L3\*La(NO<sub>3</sub>)<sub>3</sub>**.

To describe the rotation of the N-CO amide group we introduced “up” and “down” designators. Figure S41 demonstrates the difference of two isomers on the example of Meso-form.

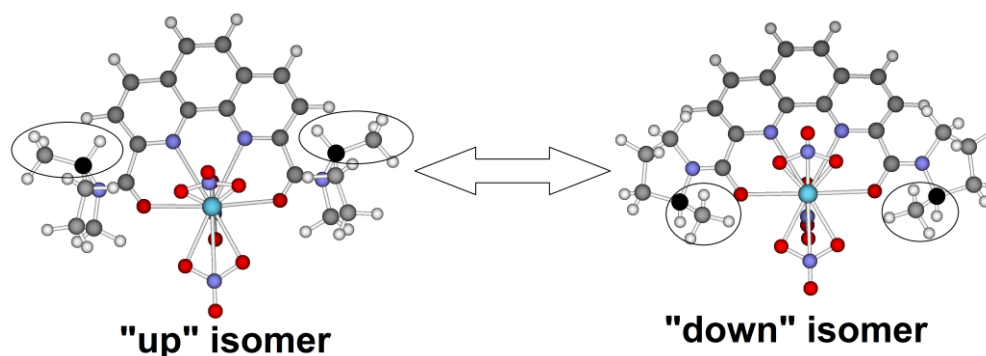

**Figure S41.** “Up” and “down” isomers of  $L3^*[La(NO_3)_3]$  on the example of Meso-form **L3**.

Also “in” and “out” isomers are possible, where the methyls are directed “inside” the complex (“in” geometry) and outside (“out” geometry). Figure S42 demonstrates the difference.

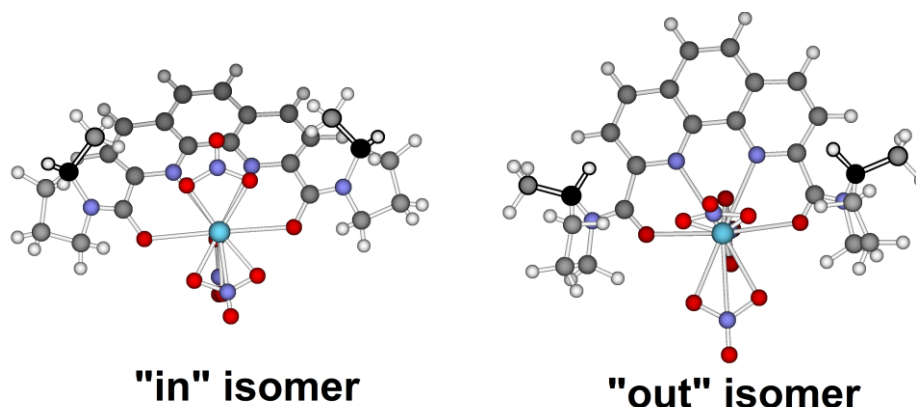

**Figure S42.** “In” and “out” isomers of  $L3^*La(NO_3)_3$  on the example of Meso-form of **L3**.

We compared relative stability of “up”/“down” and “in”/“out” isomers with each other for Meso and Rac-form. For Meso-form of **L3** geometry IV was chosen as zero point (Figure S43).

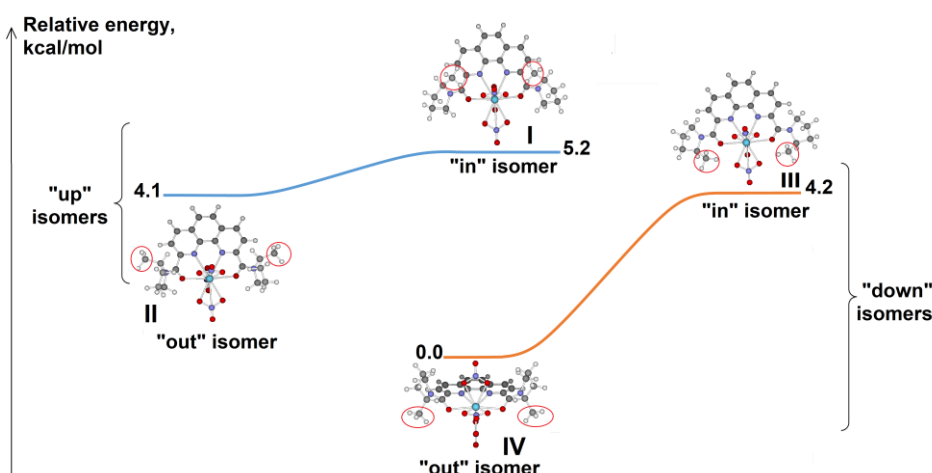

**Figure 43.** Images of geometries I-IV of  $3^*[La(NO_3)_3]$  with corresponding energies of complex formation (E, kcal/mol). Meso-form of of the ligand. Geometry IV chosen as zero point.

In the pair of ligands, where the methyls are directed “inside” the complex (“in” geometry - I, III) and outside (“out” geometry – II, IV), the most stable geometry is “out”. Geometries II, IV (“down” isomers) are more preferable than geometries I, III (“up” methyls). Table S2 shows relative energies of different isomers of  $3^*\text{La}(\text{NO}_3)_3$  and preorganization energy of ligand **3** in the corresponding complexes (E, kcal/mol).

**Table S2.** Relative energies of isomers of  $3^*\text{La}(\text{NO}_3)_3$  complex and corresponding energies of ligand preorganization (Meso-form).

| Isomer | Relative energy, kcal/mol | Preorganization energy, kcal/mol |
|--------|---------------------------|----------------------------------|
| I      | 5.2                       | 23.0                             |
| II     | 4.1                       | 22.7                             |
| III    | 4.2                       | 21.3                             |
| IV     | 0.0                       | 17.8                             |

Figure 44 shows relative energies of  $\text{L3}^*\text{La}(\text{NO}_3)_3$  with different configurations of the substituent in the pyrrolidine ring of the Rac-form of **L3** (VIII was chosen as zero point). Table S3 shows relative energy of complex and corresponding preorganization energy of **L3** (E, kcal/mol).

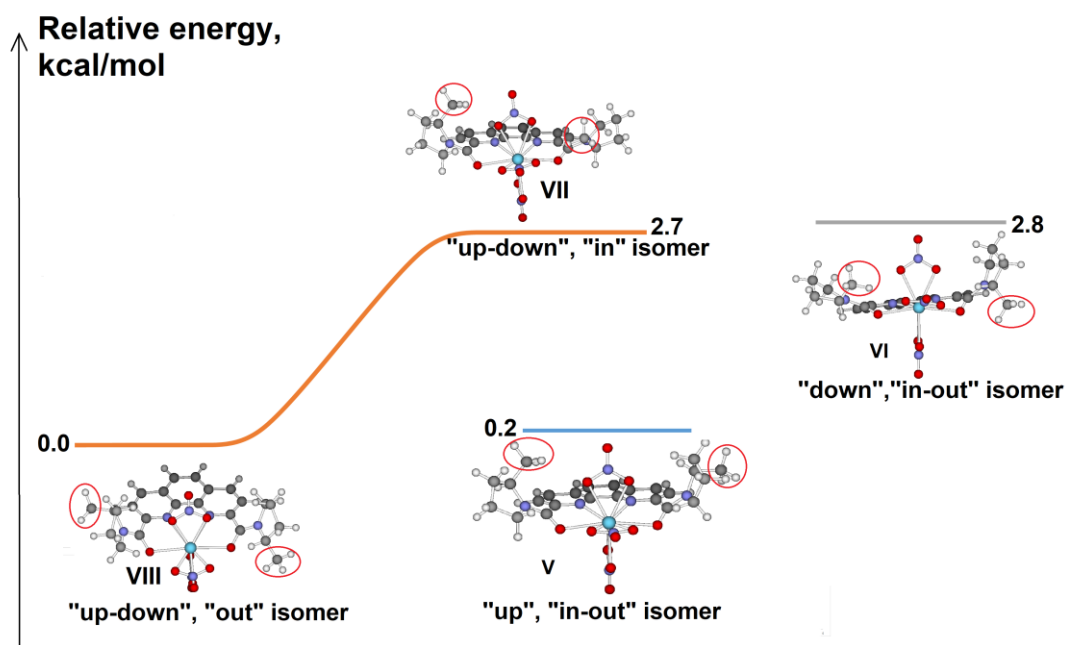

**Fig. 44.** Images of geometries V-VIII of  $\text{L3}^*[\text{La}(\text{NO}_3)_3]$  with corresponding energies of complex formation (E, kcal/mol). Rac-form of the ligand. Geometry VIII chosen as zero point.

**Table S3.** Relative energies of **L3\*La(NO<sub>3</sub>)<sub>3</sub>** complex with geometries V-VIII and energies of ligand preorganization (Rac-form).

| Isomer | Energy of complex formation, kcal/mol | Preorganization energy, kcal/mol |
|--------|---------------------------------------|----------------------------------|
| V      | 0.2                                   | 20.6                             |
| VI     | 2.8                                   | 23.0                             |
| VII    | 2.7                                   | 22.4                             |
| VIII   | 0.0                                   | 19.9                             |

Geometry VIII was used for optimization of complexes of **L3** with Nd(NO<sub>3</sub>)<sub>3</sub>, Eu(NO<sub>3</sub>)<sub>3</sub>, Lu(NO<sub>3</sub>)<sub>3</sub>, Am(NO<sub>3</sub>)<sub>3</sub>, Cm(NO<sub>3</sub>)<sub>3</sub> in case of Rac-isomer.

## L1

### Major conformer form

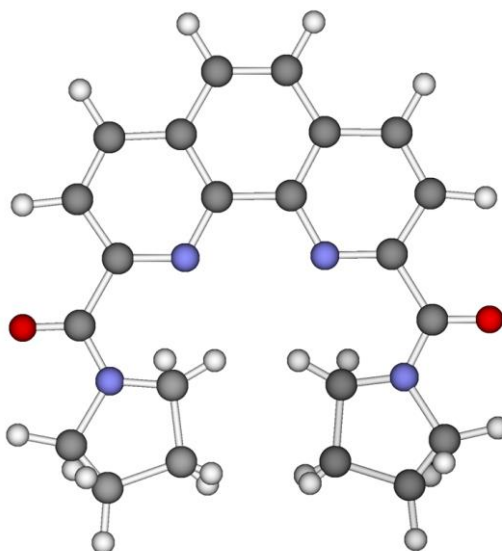

PBE/L1 theoretical level

E= -1220.515792

G= 215.1705 kcal/mol, H= 265.5272 kcal/mol, U= 264.9347 kcal/mol, S= 168.8972 cal/mol at T= 298.150 K

C 0.50669205 0.02459001 3.43878412

C 1.65194976 -0.15478058 2.45634866

C 2.94941902 -0.22254448 3.01915288

C 4.02924776 -0.34749103 2.17403865

C 3.82200646 -0.36818823 0.77446008



C 2.47820854 -0.25195736 0.30834275  
N 1.42391551 -0.16117065 1.14918780  
C -0.68469733 0.00051874 -3.41051316  
O -0.94687265 -0.54335201 -4.48569393  
N -1.62547255 0.67241019 -2.68815398  
C -2.98840904 0.77429807 -3.24336934  
C -1.44992077 1.54152274 -1.50394046  
N -0.73509741 -0.42177150 3.09669256  
H 5.04816818 -0.42520496 2.56525731  
C 4.89857864 -0.49543497 -0.15820450  
O 0.73250860 0.57666463 4.51799297  
C -1.82659876 -0.26538542 4.07663679  
C -1.13993752 -1.27355349 1.95685780  
H 3.04688096 -0.16337749 4.10412169  
C -3.62119865 1.93100297 -2.45962405  
C -2.89870000 -1.25131309 3.59593415  
H -2.19443703 0.77664077 4.06664944  
H -2.93743372 0.94305414 -4.33017063  
C 2.23036814 -0.23849554 -1.12788475  
N 0.96082073 -0.08456746 -1.56525326  
C 3.33590221 -0.38020167 -2.01918149  
C 0.73348153 -0.09074555 -2.87252092  
C 4.66387749 -0.50653398 -1.50386131  
H 5.91745186 -0.58595049 0.23012935  
C 3.05575061 -0.39294878 -3.40611219  
H 3.87853026 -0.50942796 -4.11788321  
C 1.75433242 -0.26687273 -3.83769584  
H 5.49091721 -0.61078346 -2.21254206  
H 1.47054589 -0.30576456 -4.89037704  
H -3.53143024 -0.17471781 -3.08313370  
H -1.45009196 -0.47031078 5.09075403

C -2.89220858 1.87693322 -1.10746789  
H -0.87621468 1.02255476 -0.72698718  
H -0.90009797 2.46109080 -1.78134537  
C -2.66784883 -1.30512011 2.07721400  
H -0.76934236 -0.85583246 1.01328051  
H -0.72056228 -2.29136992 2.07093000  
H -2.95513272 2.81654596 -0.53849608  
H -3.30747581 1.06634068 -0.48479947  
H -4.71237135 1.82304430 -2.37133956  
H -3.41066813 2.88933539 -2.96303487  
H -3.10026789 -2.19737029 1.60025954  
H -3.09985852 -0.41123211 1.59600663  
H -3.91300201 -0.92677683 3.87157226  
H -2.72420502 -2.24599981 4.03898191  
PBE0/L1 theoretical level  
E= -1220.582278  
C -0.18452129 -1.90319395 2.85460877  
C 1.02103710 -1.93707776 1.94958055  
C 2.03271985 -2.85241151 2.28513932  
C 3.13482594 -2.92556190 1.48067784  
C 3.20913601 -2.11614394 0.33452967  
C 2.11614013 -1.26323462 0.06554813  
N 1.05469048 -1.17821229 0.87930983  
C -0.03735534 1.99292564 -2.79694676  
O 0.16526258 3.02375841 -3.41214418  
N -1.26608622 1.63791013 -2.36829805  
C -2.37968659 2.53951263 -2.65102124  
C -1.72243178 0.34130698 -1.86212742  
N -0.91044152 -0.76767385 2.91178560  
H 3.95274854 -3.60198164 1.70998228  
C 4.33473873 -2.13741422 -0.53872651  
O -0.47739634 -2.89637661 3.49488664  
C -2.09247708 -0.75026733 3.76933527

C -0.56073713 0.57048339 2.42932868  
H 1.90221202 -3.46901703 3.16556120  
C -3.57142806 1.84735596 -2.00294995  
C -2.66502380 0.64497888 3.55783081  
H -1.80405712 -0.91815668 4.81432009  
H -2.17626143 3.53356767 -2.24524522  
C 2.14658022 -0.44170570 -1.12853026  
N 1.08301342 0.32292113 -1.41193008  
C 3.29057431 -0.48287809 -1.95557368  
C 1.12137496 1.08067715 -2.48283029  
C 4.37749577 -1.34635496 -1.63461578  
H 5.16138601 -2.80043912 -0.30221495  
C 3.30502820 0.35100770 -3.08639646  
H 4.17465115 0.35295972 -3.73668242  
C 2.22733307 1.14978540 -3.34655809  
H 5.24083853 -1.35899377 -2.29292250  
H 2.18851328 1.83473122 -4.18424654  
H -2.51174283 2.64916301 -3.73447561  
H -2.77828884 -1.55300021 3.48749352  
C -3.22182631 0.36857787 -2.14412332  
H -1.21567011 -0.48024979 -2.37089467  
H -1.51261508 0.24207507 -0.79425973  
C -1.41866422 1.48625314 3.29751444  
H 0.50689936 0.76393402 2.54466987  
H -0.79840386 0.67842805 1.36816037  
H -3.77747679 -0.27771401 -1.46091676  
H -3.41723061 0.03529892 -3.16879630  
H -4.51521778 2.11730194 -2.48173404  
H -3.63348079 2.11917377 -0.94393104  
H -1.63023555 2.43696022 2.80292654  
H -0.90627939 1.69621062 4.24228239  
H -3.24681091 0.98627228 4.41683578  
H -3.31535268 0.65452802 2.67678404

### Minor conformer form

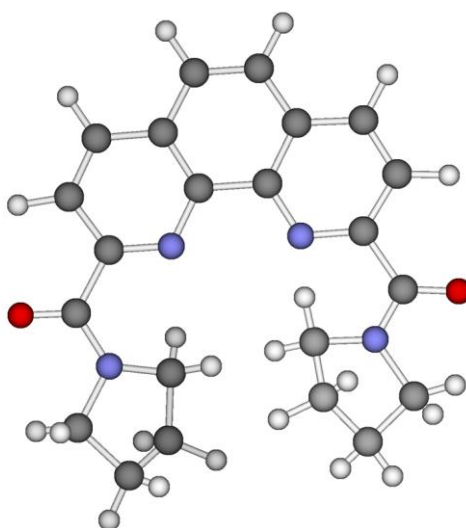

PBE/L1 theoretical level

E= -1220.515631

G= 215.1243 kcal/mol, H= 265.4704 kcal/mol, U= 264.8779 kcal/mol, S= 168.8615 cal/mol at T= 298.150 K

|   |             |             |             |
|---|-------------|-------------|-------------|
| C | -0.15624915 | -1.91864336 | 2.89387560  |
| C | 1.05151427  | -1.94239974 | 1.97654676  |
| C | 2.07461309  | -2.86084795 | 2.31242728  |
| C | 3.18265271  | -2.93679523 | 1.49902654  |
| C | 3.25269675  | -2.12948465 | 0.33900470  |
| C | 2.14499426  | -1.27071202 | 0.06590890  |
| N | 1.07760906  | -1.17889571 | 0.89103365  |
| C | -0.02226211 | 1.99445093  | -2.84622025 |
| O | 0.18598066  | 3.02630067  | -3.48717403 |
| N | -1.26539874 | 1.65943623  | -2.39676809 |
| C | -2.37884808 | 2.57881832  | -2.68889642 |
| C | -1.74096560 | 0.37831354  | -1.83636248 |
| N | -0.91733599 | -0.78784198 | 2.93780017  |
| H | 4.01038218  | -3.61360550 | 1.73138428  |
| C | 4.37964821  | -2.15503621 | -0.54086554 |
| O | -0.43061602 | -2.91757202 | 3.56163049  |
| C | -2.10257959 | -0.78588188 | 3.81306195  |

C -0.62046945 0.55883658 2.40930486  
H 1.94420445 -3.47795200 3.20278335  
C -3.58044028 1.91948688 -2.00204802  
C -2.71887112 0.59923655 3.58385634  
H -1.79673791 -0.93428832 4.86486864  
H -2.14920712 3.58683729 -2.31025290  
C 2.17050171 -0.45441958 -1.14262164  
N 1.09474266 0.31141907 -1.43347752  
C 3.32648206 -0.50087887 -1.97969365  
C 1.13580787 1.07017326 -2.52181983  
C 4.41909313 -1.36371768 -1.65320325  
H 5.21415138 -2.82062435 -0.30055743  
C 3.33783579 0.33110127 -3.12428069  
H 4.21325922 0.32709587 -3.78064084  
C 2.25156713 1.13395977 -3.39012337  
H 5.28800869 -1.37969673 -2.31795740  
H 2.21017551 1.82142532 -4.23643351  
H -2.52338386 2.66430020 -3.78150749  
H -2.77280521 -1.61828089 3.54811835  
C -3.25341392 0.42125794 -2.10084343  
H -1.24678338 -0.47327107 -2.32483006  
H -1.51415765 0.31349692 -0.76012081  
C -1.49392951 1.47544765 3.27853107  
H 0.45136297 0.78712255 2.49072456  
H -0.88845611 0.62860394 1.34278190  
H -3.81332397 -0.19725122 -1.38357341  
H -3.47057676 0.05354926 -3.11770773  
H -4.53196716 2.19046021 -2.48287511  
H -3.62886453 2.22818136 -0.94428796  
H -1.74496806 2.41406488 2.76228547  
H -0.96540523 1.72573555 4.21357441

H -3.29540229 0.94467551 4.45467663

H -3.39386463 0.57430989 2.71193695

**TS**

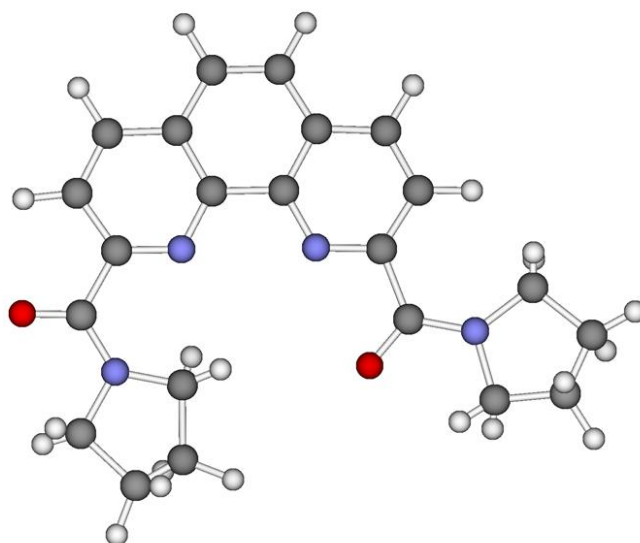

PBE/L1 theoretical level

E= -1220.500628

G= 216.3676 kcal/mol, H= 264.8377 kcal/mol, U= 264.2452 kcal/mol, S= 162.5694 cal/mol at T= 298.150 K

C -0.66286463 -0.56409121 2.18587375

C 0.74898380 -0.82229871 1.62615013

C 1.84274387 -1.41785109 2.30309772

C 3.04342508 -1.58387339 1.63701236

C 3.17371440 -1.15622294 0.30106142

C 2.01757884 -0.56371444 -0.29127011

N 0.85460532 -0.41550991 0.36319819

C -0.13831694 1.55667448 -4.11031961

O 0.00691081 2.17741299 -5.16764545

N -1.34005249 1.48990047 -3.46940207

C -2.46740055 2.23396420 -4.05727911

C -1.76542640 0.68749338 -2.29571176

N -0.94595671 -0.74909985 3.52305055

H 3.89706349 -2.04654551 2.14153695  
C 4.38268661 -1.29353821 -0.45237002  
O -1.53891599 -0.15341127 1.43383193  
C -2.28733206 -0.33012763 3.97579646  
C -0.15224172 -1.29351556 4.63819504  
H 1.76803172 -1.75392938 3.33331609  
C -3.55829978 2.14214158 -2.98567724  
C -2.14005208 -0.22729287 5.49461794  
H -3.04566002 -1.08205688 3.68870902  
H -2.15432191 3.26228571 -4.29444027  
C 2.09830952 -0.10327463 -1.67409813  
N 1.00179768 0.45159006 -2.22509074  
C 3.32240796 -0.25967512 -2.38733101  
C 1.06107497 0.87431335 -3.47922921  
C 4.45281124 -0.86141592 -1.74674046  
H 5.25160265 -1.75232768 0.02904502  
C 3.35518622 0.20298304 -3.72515416  
H 4.27780581 0.10169422 -4.30487156  
C 2.22922993 0.77701056 -4.27430868  
H 5.38014078 -0.96855074 -2.31790543  
H 2.19012642 1.17364502 -5.29024839  
H -2.78424335 1.76127124 -5.00575447  
H -2.55983424 0.61401755 3.48284173  
C -3.29825330 0.76737046 -2.35196352  
H -1.39163888 -0.34251699 -2.36663699  
H -1.36654091 1.10180724 -1.35819983  
C -1.14736474 -1.35293090 5.81178141  
H 0.23221838 -2.30040526 4.40878391

H 0.70199037 -0.63494843 4.88114786  
H -3.73874426 0.65328664 -1.35080516  
H -3.69939065 -0.02824003 -3.00249577  
H -4.56720877 2.24323153 -3.41311002  
H -3.41822553 2.93850946 -2.23574829  
H -0.64158672 -1.23756659 6.78210211  
H -1.66733778 -2.32500744 5.80844212  
H -3.10171819 -0.34199724 6.01618481  
H -1.71151710 0.75133240 5.76803064

**L2**

**Main conformer form**

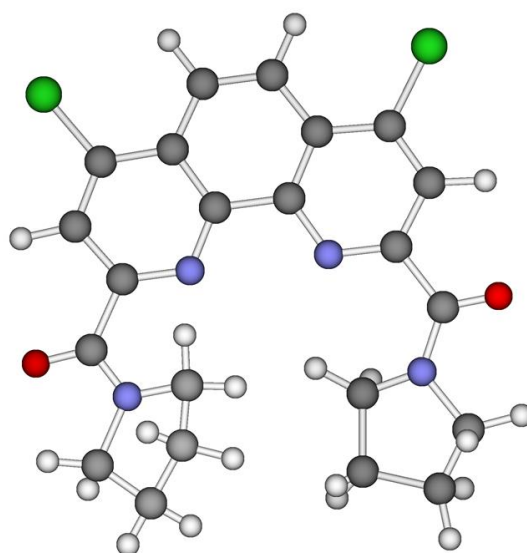

PBE/L1 theoretical level

E= -2142.322484

G= 200.5479 kcal/mol, H= 255.2129 kcal/mol, U= 254.6205 kcal/mol, S= 183.3474 cal/mol at T= 298.150 K

Cl -4.29350901 4.24362421 -1.86920726  
Cl -3.94397187 -3.05972767 -3.86619782  
N -1.08451378 1.43870521 -0.26835915  
N 0.54019773 2.46715355 1.88851488  
N -0.88402522 -1.15145838 -1.09416842  
N 1.48223913 -2.76844192 -0.53604239



O 0.16254187 4.50350857 0.95195830  
O 0.06111306 -4.52803087 -0.77013922  
C -1.14608943 2.71318078 0.09241261  
C -2.10713673 3.62439418 -0.40015197  
H -2.05478072 4.66638899 -0.08432339  
C -3.06205678 3.15179205 -1.26991141  
C -3.05010962 1.79257214 -1.68318915  
C -4.00587988 1.22781658 -2.57836962  
H -4.79711485 1.87160027 -2.96612859  
C -3.94037819 -0.08718046 -2.94340634  
H -4.68125439 -0.51113194 -3.62329936  
C -2.90473986 -0.93609041 -2.45347595  
C -2.77910948 -2.30944681 -2.79465795  
C -1.74720883 -3.06404519 -2.28653336  
H -1.63538694 -4.12876415 -2.49084997  
C -0.80262834 -2.42498541 -1.45161843  
C -1.91310060 -0.41611612 -1.56449711  
C -2.00131297 0.98083198 -1.14813602  
C -0.09712393 3.30125308 1.02010071  
C 0.29057896 -3.32326198 -0.89231282  
C 0.19841297 1.08367074 2.27855682  
H 0.62242717 0.35975578 1.56454074  
H -0.89016187 0.93469542 2.28998518  
C 0.83542401 0.94673055 3.66919088  
H 0.15078458 1.33920228 4.43953896  
H 1.06585991 -0.10095011 3.91354680  
C 2.08188963 1.83948481 3.56731844  
H 2.87782502 1.31789291 3.00954843  
H 2.48622322 2.13647437 4.54617548  
C 1.57727671 3.04359579 2.76367164  
H 1.13304043 3.81880212 3.41405749

H 2.35707927 3.53166080 2.15889931  
C 2.53469825 -3.65920091 -0.00964912  
H 2.56347394 -4.59202337 -0.59385419  
H 2.30421400 -3.93320513 1.03554296  
C 3.81491804 -2.81997609 -0.11176435  
C 3.30087280 -1.37673473 0.01500098  
C 1.99499595 -1.40357172 -0.78669721  
H 4.00627279 -0.62641662 -0.37221035  
H 3.08790421 -1.13999677 1.07148516  
H 4.28570032 -2.96610856 -1.09809244  
H 4.54921293 -3.09085417 0.66108602  
H 1.25678587 -0.65336692 -0.47860202  
H 2.19963098 -1.26370025 -1.86528623  
PBE0/L1 theoretical level  
E= -2142.446397  
Cl -4.61403799 3.95509982 -1.46872211  
Cl -3.42003655 -2.87574625 -4.38296556  
N -1.13852799 1.37555456 -0.21634842  
N 0.88480210 2.69225144 1.38010347  
N -0.77720344 -1.12957084 -1.17318702  
N 1.09476006 -2.92737484 0.03918375  
O -0.84128475 3.91193700 2.15462112  
O 1.10480988 -3.95840979 -1.96020770  
C -1.32108533 2.57225132 0.28504363  
C -2.40227175 3.39894962 -0.05703879  
H -2.51153803 4.35612392 0.43461958  
C -3.28337598 2.94682503 -0.99633658  
C -3.11898112 1.67124379 -1.57484150  
C -3.98786116 1.13400197 -2.56273866  
H -4.82486582 1.73420513 -2.89741778  
C -3.77623701 -0.09742694 -3.08136344

H -4.43949556 -0.49494454 -3.83955622  
C -2.68643165 -0.89893454 -2.64554834  
C -2.41127896 -2.18630385 -3.15128517  
C -1.34691083 -2.89950943 -2.68106723  
H -1.08065212 -3.87581301 -3.06334448  
C -0.56669909 -2.32616830 -1.66600883  
C -1.80344081 -0.41537246 -1.65290701  
C -2.01450109 0.91698366 -1.11794853  
C -0.39545348 3.11268568 1.35178578  
C 0.61445940 -3.14339805 -1.20118535  
C 1.62555134 1.91463947 0.38065293  
H 1.75602317 2.50074124 -0.53877139  
H 1.09475935 0.99969524 0.12660155  
C 2.96924376 1.68243575 1.05897653  
H 2.90248728 0.81743485 1.72780073  
H 3.76606202 1.49712908 0.33523953  
C 3.17012215 2.95828295 1.87179303  
H 3.50346923 3.76946139 1.21632361  
H 3.89941382 2.84927988 2.67737961  
C 1.77162743 3.25504279 2.39913034  
H 1.58950126 2.76669431 3.36383224  
H 1.56505883 4.32013226 2.52724814  
C 2.25392389 -3.70687294 0.46935335  
H 3.09131145 -3.55211592 -0.21541397  
H 2.01304626 -4.77668428 0.45607525  
C 2.51884961 -3.20246387 1.88170207  
C 1.12307775 -2.83714032 2.37866020  
C 0.47909263 -2.19943166 1.15145993  
H 1.12870979 -2.15942216 3.23520851  
H 0.57736886 -3.74380255 2.66017509  
H 3.15206695 -2.30955720 1.84912312

H 3.01649261 -3.95274663 2.49979424  
 H -0.60620117 -2.30865788 1.14161587  
 H 0.70228136 -1.13121390 1.09070051

**Minor conformer form**

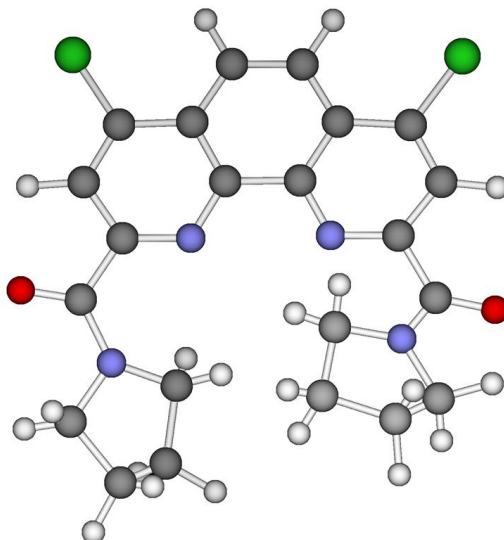

PBE/L1 theoretical level

E= -2142.322322

G= 200.5423 kcal/mol, H= 255.2157 kcal/mol, U= 254.6232 kcal/mol, S= 183.3755 cal/mol at T= 298.150 K

Cl -5.79583883 2.39829707 0.69373947  
 Cl -3.53411746 -2.57139349 -4.56343985  
 N -1.50298703 0.91586417 0.44106477  
 N 0.42048100 2.36072779 2.09331298  
 N -0.71935260 -0.97167420 -1.36251295  
 N 1.84781384 -2.28223038 -1.15776730  
 O -1.34076762 2.63996148 3.50532007  
 O 1.60989428 -2.68687749 -3.38161731  
 C -1.88364220 1.79829717 1.35361540  
 C -3.21203589 2.26259828 1.48544729  
 H -3.45274806 2.94995713 2.29630303  
 C -4.14927053 1.81085789 0.58543181  
 C -3.79064703 0.87421888 -0.42075109  
 C -4.70123243 0.36388993 -1.39215767

H -5.73516750 0.71216023 -1.36823559  
C -4.29393816 -0.53616548 -2.33597374  
H -4.99641180 -0.91400820 -3.08071256  
C -2.94853592 -1.00770819 -2.37248898  
C -2.46386719 -1.93921828 -3.32946563  
C -1.15183556 -2.35069346 -3.29940200  
H -0.72664887 -3.03503895 -4.03365707  
C -0.32031226 -1.84929204 -2.27284884  
C -1.99871075 -0.54146487 -1.41040838  
C -2.42681718 0.44523734 -0.42263901  
C -0.90481418 2.30458522 2.40242386  
C 1.12519884 -2.31364059 -2.31236815  
C 1.08401716 2.19508314 0.78116930  
H 0.82932192 3.04060721 0.11421576  
H 0.75431669 1.26731563 0.29814592  
C 2.57283497 2.22688365 1.14387667  
H 2.90129852 1.22529626 1.47013426  
H 3.19725919 2.53488851 0.29199517  
C 2.62189031 3.21107626 2.32373905  
H 2.56910515 4.24782467 1.95189762  
H 3.53049326 3.11295199 2.93587470  
C 1.35329652 2.87150097 3.11652541  
H 1.53974855 2.09101748 3.87601399  
H 0.90481985 3.73288846 3.63521934  
C 3.25736451 -2.71101642 -1.21495914  
H 3.80999899 -2.10525417 -1.94964564  
H 3.31731796 -3.76357937 -1.54624045  
C 3.74855208 -2.53289986 0.22644217  
C 2.48227882 -2.79319000 1.05695784  
C 1.38273931 -2.10680699 0.23354658  
H 2.53971934 -2.39206004 2.07981014

|   |            |             |            |
|---|------------|-------------|------------|
| H | 2.28676271 | -3.87662506 | 1.12044775 |
| H | 4.09897614 | -1.49875653 | 0.38273552 |
| H | 4.57598257 | -3.21619058 | 0.46791553 |
| H | 0.39263457 | -2.56042218 | 0.37856415 |
| H | 1.29558265 | -1.03778017 | 0.48540643 |

**TS**

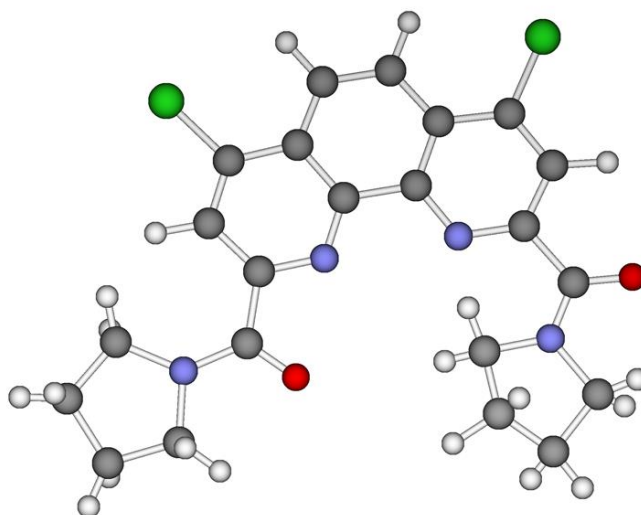

PBE/L1 theoretical level

E= -2142.308103

G= 202.0217 kcal/mol, H= 254.5708 kcal/mol, U= 253.9783 kcal/mol, S= 176.2505 cal/mol at T= 298.150 K

|    |             |             |             |
|----|-------------|-------------|-------------|
| Cl | -4.39709044 | 3.34136415  | -0.34340325 |
| Cl | -4.04154348 | -3.10402417 | -4.36550474 |
| N  | -0.78990543 | 0.59731156  | -0.24904518 |
| N  | 0.60899365  | 2.89512157  | 2.22231627  |
| N  | -0.65067792 | -1.68808031 | -1.68822122 |
| N  | 1.67576838  | -3.32358956 | -1.44545138 |
| O  | 1.41683960  | 1.12038827  | 1.09254956  |
| O  | 0.85866147  | -4.54525042 | -3.18120837 |
| C  | -0.81338423 | 1.71194363  | 0.47574839  |
| C  | -1.92933977 | 2.58111906  | 0.46147841  |
| H  | -1.96933508 | 3.49784541  | 1.04045045  |
| C  | -3.01854634 | 2.25705242  | -0.32577321 |

C -3.03045654 1.07755113 -1.10384631  
C -4.11349678 0.66474569 -1.93644381  
H -5.00317049 1.29492700 -1.98632312  
C -4.04294682 -0.49445754 -2.65680861  
H -4.87616634 -0.80300975 -3.29084301  
C -2.88561201 -1.32922542 -2.60469747  
C -2.74217486 -2.54225254 -3.33118629  
C -1.58641791 -3.28289104 -3.23509526  
H -1.41523075 -4.20703077 -3.78795552  
C -0.55932051 -2.80849409 -2.38649654  
C -1.77563703 -0.95772159 -1.78698969  
C -1.84730411 0.27932891 -1.01022232  
C 0.48921287 1.89880502 1.27939248  
C 0.71483916 -3.63601804 -2.35923338  
C -0.28571928 3.99697518 2.61990690  
H -1.21136594 3.61224055 3.08588743  
H -0.55762565 4.62919474 1.75922322  
C 0.54331338 4.80373049 3.63617039  
H 1.12942469 5.57395029 3.10862231  
H -0.09679489 5.30646467 4.37633753  
C 1.48323846 3.75449133 4.24321318  
H 0.95046550 3.15079045 4.99664927  
H 2.37123966 4.19634962 4.71862602  
C 1.84245002 2.88860750 3.03502178  
H 2.68494153 3.31668043 2.46108055  
H 2.10851479 1.85156429 3.28454661  
C 2.94032335 -4.07865095 -1.50427532  
H 3.30210090 -4.12020969 -2.54293680  
H 2.77741027 -5.12069321 -1.17170894  
C 3.86163521 -3.31469131 -0.54834718  
C 2.88770008 -2.79030800 0.51721406

|   |            |             |             |
|---|------------|-------------|-------------|
| C | 1.65443289 | -2.37926364 | -0.30044422 |
| H | 3.28182888 | -1.94076753 | 1.09365022  |
| H | 2.62814403 | -3.59957242 | 1.22056282  |
| H | 4.33722639 | -2.47140837 | -1.07625401 |
| H | 4.65471172 | -3.95728374 | -0.13763843 |
| H | 0.71876252 | -2.46916294 | 0.26658735  |
| H | 1.71708369 | -1.33448648 | -0.63888144 |

### L3 (meso-form)

#### Major conformer form

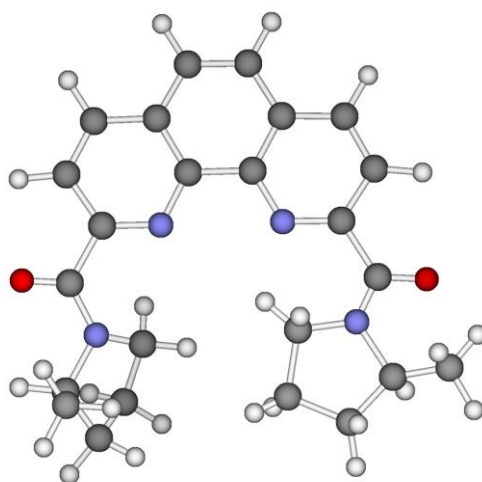

PBE/L1 theoretical level

E= -1299.088466

G= 247.8562 kcal/mol, H= 301.4012 kcal/mol, U= 300.8088 kcal/mol, S= 179.5911 cal/mol at T= 298.150 K

|   |             |             |             |
|---|-------------|-------------|-------------|
| N | -1.69619572 | 1.20762539  | 0.13207451  |
| N | 0.34175634  | 2.66875148  | 1.55578172  |
| N | -1.29380679 | -1.37179327 | -0.74728328 |
| N | 1.40638399  | -2.53051925 | -1.17062330 |
| O | -0.72449744 | 4.52292013  | 0.75930125  |
| O | 0.31477761  | -4.50516987 | -0.89276832 |
| C | -1.88787138 | 2.46830201  | 0.50204033  |
| C | -3.13634753 | 3.12872362  | 0.41342810  |
| H | -3.18914628 | 4.18056011  | 0.69888294  |
| C | -4.22592402 | 2.41875553  | -0.03917619 |
| C | -4.06280279 | 1.07121682  | -0.43889642 |



C -5.15154839 0.27924079 -0.92136228  
H -6.14518690 0.73445326 -0.97238570  
C -4.96004105 -1.01679277 -1.30823493  
H -5.79814816 -1.61984718 -1.67025435  
C -3.66246486 -1.61507320 -1.25311089  
C -3.42438889 -2.95279384 -1.64796793  
C -2.14933014 -3.46726584 -1.57651627  
H -1.90986335 -4.49935913 -1.83545792  
C -1.09840894 -2.62437081 -1.13722908  
C -2.54457283 -0.86210549 -0.78602815  
C -2.75211382 0.51247263 -0.34791222  
C -0.70898169 3.30686975 0.96224838  
C 0.27471945 -3.28092980 -1.04985344  
C 0.32918185 1.34232080 2.20108080  
H 0.74586689 0.57378602 1.52860630  
C 1.22114289 1.55118418 3.43160820  
H 0.63911027 2.01733637 4.24412537  
H 1.64060068 0.60460508 3.80463815  
C 2.28736091 2.52242780 2.90930128  
H 3.03958631 1.97182631 2.31735492  
H 2.81450272 3.06677723 3.70695496  
C 1.51013017 3.47946715 1.98568702  
C 2.32878327 3.99778247 0.80333376  
C 2.72310281 -3.20980620 -1.02787983  
C 3.04471183 -4.13482475 -2.20339775  
C 3.72194862 -2.04050088 -0.87868983  
C 2.86312556 -0.83783644 -0.46076179  
C 1.56691229 -1.06586194 -1.24347794  
H 3.33026814 0.12970939 -0.70033085  
H 2.65356874 -0.86655229 0.62200302  
H 4.19609499 -1.83778250 -1.85460782  
H 4.51972771 -2.27983475 -0.15984203  
H 1.69554961 -0.74891031 -2.29666066  
H 0.68297940 -0.56794554 -0.82754177  
H -0.69481772 1.04001451 2.45435333

H 4.03711796 -4.59169292 -2.05636191  
H 3.06066918 -3.56794357 -3.14843869  
H 2.29373026 -4.93377066 -2.26961994  
H 1.70988131 4.65095091 0.17286631  
H 2.70556474 3.15733671 0.19811307  
H 3.19088960 4.57728767 1.17198873  
H 1.12452900 4.34658670 2.55430365  
H 2.67876482 -3.81601882 -0.10529969  
H -5.21619701 2.87995791 -0.10080498  
H -4.26038456 -3.56394720 -2.00129962  
PBE0/L1 theoretical level  
E= -1299.169662  
N -1.68689263 1.20631182 0.12307533  
N 0.33680353 2.64305234 1.53576756  
N -1.28655279 -1.36326110 -0.72488070  
N 1.39776528 -2.50427699 -1.13380003  
O -0.71838039 4.48467064 0.76527417  
O 0.32132542 -4.46001387 -0.87069023  
C -1.87390280 2.45383501 0.48696706  
C -3.11235523 3.11113000 0.39915964  
H -3.16741157 4.15409660 0.68471360  
C -4.19227362 2.40599728 -0.05264061  
C -4.02858829 1.06643486 -0.44339558  
C -5.11245155 0.27670503 -0.92494988  
H -6.09764767 0.72945273 -0.98202628  
C -4.92149925 -1.00794196 -1.30211461  
H -5.75090170 -1.60740733 -1.66481268  
C -3.62887049 -1.60336804 -1.23782432  
C -3.39190102 -2.93361902 -1.62307131  
C -2.12697077 -3.44383407 -1.54385650  
H -1.88904846 -4.46838856 -1.79842234  
C -1.08848107 -2.60341644 -1.10251665  
C -2.52539253 -0.85618585 -0.77462524  
C -2.73264146 0.51326805 -0.34871557  
C -0.70086241 3.28160167 0.95295179

C 0.28000182 -3.24973440 -1.01744044  
C 0.30835521 1.32819283 2.17777061  
H 0.70186347 0.55761939 1.50832367  
C 1.20833302 1.52246392 3.39204836  
H 0.64313018 1.99196041 4.20397282  
H 1.61719406 0.57755160 3.75782180  
C 2.27212453 2.47717619 2.86567640  
H 3.00283003 1.92513907 2.26288843  
H 2.81332207 3.00628543 3.65331721  
C 1.49625599 3.44055963 1.96643591  
C 2.30785537 3.96667361 0.79588062  
C 2.70253825 -3.17984271 -1.01497316  
C 3.00954366 -4.08444023 -2.19728994  
C 3.69924760 -2.02157307 -0.87308657  
C 2.85248351 -0.82839423 -0.44349214  
C 1.55626202 -1.05227792 -1.20770359  
H 3.31374073 0.13333866 -0.68108135  
H 2.65535498 -0.86419731 0.63330621  
H 4.15834379 -1.81631207 -1.84670150  
H 4.49949217 -2.26324606 -0.16989645  
H 1.67439437 -0.73650163 -2.25359058  
H 0.69007719 -0.54901314 -0.78539538  
H -0.70886260 1.04402852 2.44486308  
H 4.00194073 -4.52952385 -2.07359934  
H 3.00502682 -3.50916529 -3.12854719  
H 2.27102494 -4.88416672 -2.26302791  
H 1.69803619 4.62906456 0.17986335  
H 2.67137194 3.13664556 0.18220359  
H 3.17093372 4.52879763 1.16615999  
H 1.12222278 4.29396582 2.54688644  
H 2.67531943 -3.78941083 -0.10424390  
H -5.17350912 2.86590886 -0.12137170  
H -4.21911860 -3.54241467 -1.97554350

## Minor conformer form

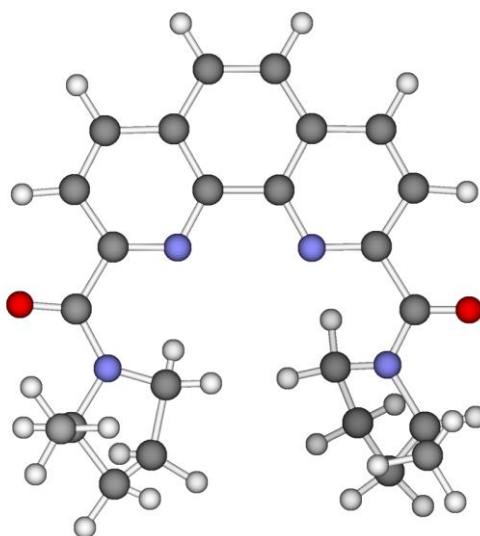

PBE/L1 theoretical level

E= -1299.087579

G= 247.5977 kcal/mol, H= 301.3502 kcal/mol, U= 300.7577 kcal/mol, S= 180.2865 cal/mol at T= 298.150 K

|   |             |             |             |
|---|-------------|-------------|-------------|
| N | -1.77108836 | 1.10327172  | 0.36975443  |
| N | 0.05094437  | 1.87907565  | 2.47495556  |
| N | -0.92177862 | -0.49864471 | -1.72738016 |
| N | 1.59155428  | -1.96527886 | -1.74129796 |
| O | -1.59994888 | 3.26888132  | 3.19446707  |
| O | 1.50219822  | -1.58721864 | -3.99076581 |
| C | -2.19244885 | 1.84503496  | 1.38692653  |
| C | -3.53457975 | 2.27167058  | 1.53557503  |
| H | -3.78119946 | 2.88862610  | 2.40079451  |
| C | -4.44966650 | 1.91786373  | 0.57108825  |
| C | -4.03027821 | 1.15039730  | -0.54072785 |
| C | -4.92408276 | 0.79516423  | -1.59826696 |
| H | -5.96659851 | 1.12066293  | -1.53218007 |
| C | -4.48403978 | 0.08198099  | -2.67589498 |
| H | -5.16580677 | -0.17200339 | -3.49313045 |
| C | -3.12400079 | -0.35032752 | -2.76398683 |
| C | -2.63931513 | -1.07366765 | -3.87884879 |

C -1.32021379 -1.46526027 -3.91018891  
H -0.87697023 -1.98603392 -4.76053858  
C -0.50490111 -1.17853558 -2.79015446  
C -2.20077920 -0.05534205 -1.71412396  
C -2.66002846 0.74941856 -0.58568162  
C -1.22237062 2.37122750 2.43615079  
C 0.94892722 -1.60419536 -2.88988686  
C 0.55886620 0.61273146 1.91498160  
H 1.02664948 0.78090930 0.92927510  
C 1.58702338 0.16218401 2.96026254  
H 1.07652724 -0.34841135 3.79399443  
H 2.33452415 -0.52656525 2.53707576  
C 2.19137192 1.48978806 3.43259335  
H 2.93641496 1.84549451 2.69958949  
H 2.68433952 1.42385721 4.41395569  
C 0.99837059 2.46357155 3.46145010  
C 1.38038373 3.90626407 3.12855053  
C 3.01338816 -2.38679338 -1.82605684  
C 3.95443845 -1.21454072 -2.10207868  
C 3.25871706 -3.08180690 -0.47329167  
C 1.86945271 -3.56849098 -0.04020175  
C 0.96018922 -2.41692901 -0.48861122  
H 1.79378283 -3.76082134 1.04086637  
H 1.59987926 -4.49290466 -0.57768267  
H 3.64281058 -2.34431815 0.25361916  
H 3.99992633 -3.89019656 -0.55999362  
H 0.94580418 -1.60541606 0.25701129  
H -0.07799070 -2.72812748 -0.66485548  
H -0.25949135 -0.10050450 1.76539993  
H 4.99605894 -1.57287228 -2.14228392  
H 3.87463713 -0.45885500 -1.30416763

H 3.70543170 -0.75083804 -3.06661916  
 H 0.48806062 4.54655027 3.14282560  
 H 1.85313225 3.95984650 2.13468146  
 H 2.09713364 4.28196716 3.87700438  
 H 0.50240099 2.44897890 4.44995403  
 H 3.09822464 -3.10970378 -2.65930820  
 H -5.49545050 2.23244786 0.64078981  
 H -3.31853580 -1.30326247 -4.70538807

**TS**

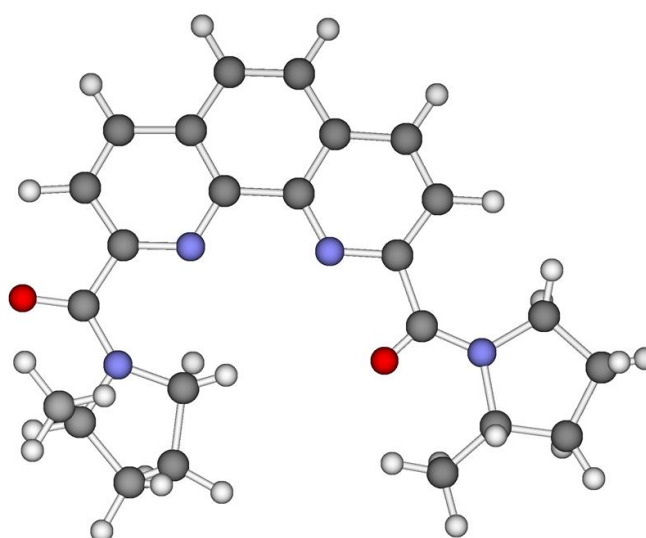

PBE/L1 theoretical level

E= -1299.071038

G= 248.7280 kcal/mol, H= 300.6613 kcal/mol, U= 300.0688 kcal/mol, S= 174.1851 cal/mol at T= 298.150 K

N -1.85456383 1.51674545 0.67439634  
 N -0.05621323 2.71905446 2.52637529  
 N -0.89411426 -0.34168124 -1.08951724  
 N 1.72109401 -2.63805580 -1.99655354  
 O -1.75453269 4.14749002 3.05946326  
 O 1.75459075 -0.51644397 -1.19800651  
 C -2.31339097 2.40202522 1.54727304  
 C -3.67959118 2.76402044 1.63700402  
 H -3.96222496 3.51575279 2.37582588

C -4.57720852 2.17239022 0.77502358  
C -4.11665964 1.22810125 -0.17384705  
C -4.98604918 0.58727831 -1.11370277  
H -6.05060720 0.84031850 -1.09623528  
C -4.50334787 -0.31738314 -2.01665115  
H -5.17410278 -0.80000395 -2.73394513  
C -3.11386824 -0.65925688 -2.03984118  
C -2.56491852 -1.59408140 -2.93984866  
C -1.21654820 -1.89613163 -2.88687086  
H -0.81590617 -2.62276769 -3.58906984  
C -0.39647534 -1.24360323 -1.93297195  
C -2.20561242 -0.05181603 -1.12119603  
C -2.72267985 0.92875451 -0.17143203  
C -1.35077417 3.14754701 2.45738769  
C 1.12118530 -1.42416060 -1.72239208  
C 0.49290386 1.38585830 2.18384600  
H 0.87112039 1.36158001 1.14888299  
C 1.61798489 1.20432556 3.21015525  
H 1.20584297 0.83395422 4.16403913  
H 2.37795281 0.49046275 2.85824227  
C 2.15927410 2.62812996 3.37854409  
H 2.81999302 2.88125825 2.53095317  
H 2.72613263 2.77796507 4.30979919  
C 0.90509176 3.51966190 3.32981777  
C 1.16648316 4.90273714 2.73155093  
C 3.11070323 -2.84806371 -1.49834490  
C 3.21753860 -2.77571774 0.02516067  
C 3.47408056 -4.23274040 -2.05462050  
C 2.68277168 -4.32748461 -3.35972929  
C 1.35180616 -3.64198780 -3.01131105  
H 2.53373981 -5.35963440 -3.71069360

H 3.19200563 -3.76179552 -4.15713406  
H 3.13763809 -5.01093006 -1.34724343  
H 4.55983067 -4.34285975 -2.19329405  
H 0.61660349 -4.36844110 -2.61758375  
H 0.92960888 -3.16644263 -3.90788221  
H -0.28333047 0.61561882 2.25659132  
H 4.25704193 -2.98178077 0.32793999  
H 2.56224608 -3.52931499 0.49113658  
H 2.93507957 -1.77716398 0.38259408  
H 0.23623993 5.48586941 2.70221353  
H 1.57150662 4.80791521 1.71123672  
H 1.90274239 5.44024277 3.35145283  
H 0.47528741 3.64772153 4.34144068  
H 3.76097274 -2.06869316 -1.93911958  
H -5.64147472 2.42520881 0.80660617  
H -3.21289897 -2.07955194 -3.67591500

### L3 (rac-form)

#### Major conformer form

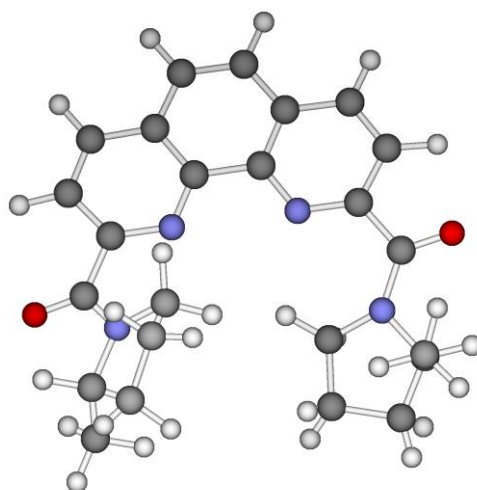

PBE/L1 theoretical level

E= -1299.089322

G= 247.8562 kcal/mol, H= 301.3675 kcal/mol, U= 300.7750 kcal/mol, S= 180.6215 cal/mol at T= 298.150 K

H -4.94985151 3.18852401 -1.01832283



H -4.11966944 -3.34480357 -2.66866899  
N -1.59909391 1.33277333 -0.29634023  
N 0.64745712 2.95599461 0.56795353  
N -1.28650415 -1.33457685 -0.88830990  
N 0.99880058 -2.81767440 0.04051958  
O -0.94803435 4.33189821 1.43631327  
O 0.55023032 -4.22240734 -1.70061779  
C -1.75267816 2.61279464 0.01357835  
C -2.95572567 3.32573032 -0.20907135  
H -3.00831318 4.36601067 0.11549281  
C -4.00783157 2.67183542 -0.81113827  
C -3.87394333 1.30763304 -1.16324103  
C -4.92456341 0.56794792 -1.79114795  
H -5.86730146 1.07963789 -2.00677824  
C -4.75769806 -0.74795002 -2.11859965  
H -5.56328249 -1.30678332 -2.60433292  
C -3.53099442 -1.42714810 -1.83611631  
C -3.32070851 -2.78544784 -2.17270613  
C -2.11237383 -3.37772632 -1.88015580  
H -1.87532032 -4.40900469 -2.14646602  
C -1.12587941 -2.61115932 -1.21514404  
C -2.45821571 -0.73510176 -1.19770646  
C -2.63072419 0.67360133 -0.86572063  
C -0.64321184 3.37060595 0.72501272  
C 0.20804100 -3.29246831 -0.96667230  
C 1.19233489 2.00566387 -0.42843279  
H 1.04983819 2.40401268 -1.45088124  
C 2.68241477 1.94868338 -0.07744909  
H 2.85572743 1.20749760 0.72052938  
H 3.29710841 1.66558230 -0.94501287  
C 2.97445917 3.36709213 0.43649733

|                           |             |             |             |
|---------------------------|-------------|-------------|-------------|
| H                         | 3.08182502  | 4.05992699  | -0.41474658 |
| H                         | 3.88781762  | 3.43014193  | 1.04730093  |
| C                         | 1.71777976  | 3.72468567  | 1.25122321  |
| C                         | 1.81479347  | 3.35134053  | 2.73488379  |
| H                         | 1.46649837  | 4.79607010  | 1.17662644  |
| C                         | 2.31789041  | -3.46450543 | 0.26348636  |
| C                         | 3.32202935  | -3.13964963 | -0.84253883 |
| H                         | 2.15510058  | -4.55846357 | 0.28069869  |
| C                         | 2.73690557  | -2.95248795 | 1.65470314  |
| C                         | 1.41142118  | -2.61654043 | 2.34963942  |
| C                         | 0.57875389  | -2.01928067 | 1.20833933  |
| H                         | 1.52611327  | -1.91455770 | 3.18941808  |
| H                         | 0.92998189  | -3.53419447 | 2.72688699  |
| H                         | 3.34034348  | -3.69653392 | 2.19575930  |
| H                         | -0.50304139 | -2.10104585 | 1.37060416  |
| H                         | 0.81076127  | -0.95114940 | 1.05917752  |
| H                         | 3.34522700  | -2.03777385 | 1.54141939  |
| H                         | 4.28634357  | -3.62765908 | -0.62590504 |
| H                         | 3.48719192  | -2.05183339 | -0.90578628 |
| H                         | 2.95116568  | -3.50810552 | -1.80892265 |
| H                         | 0.67469984  | 1.04076123  | -0.36840284 |
| H                         | 0.84727699  | 3.52898192  | 3.22586060  |
| H                         | 2.57512927  | 3.97728562  | 3.22979403  |
| H                         | 2.09349990  | 2.29331946  | 2.86361718  |
| PBE0/L1 theoretical level |             |             |             |
| E= -1299.171027           |             |             |             |
| H                         | -5.10137606 | 1.28590834  | 2.71428299  |
| H                         | -4.37017298 | -3.29692602 | -2.17720747 |
| N                         | -1.67026913 | 0.65423101  | 1.05370021  |
| N                         | 0.44115311  | 2.51560736  | 1.66070497  |
| N                         | -1.35402071 | -1.25552630 | -0.87234473 |
| N                         | 1.24158108  | -2.05304551 | -1.74309254 |

O -0.63160962 2.76725245 3.62749147  
O 0.18990660 -2.71847987 -3.62687945  
C -1.80894005 1.55843425 1.99302506  
C -3.02944684 1.81414795 2.64224911  
H -3.04913592 2.55068588 3.43537164  
C -4.13481045 1.11186171 2.25101352  
C -4.01870108 0.14445046 1.23835480  
C -5.12976313 -0.62102258 0.78032941  
H -6.10194921 -0.44568804 1.23169720  
C -4.98079300 -1.54382145 -0.19734554  
H -5.83145237 -2.12087011 -0.54701662  
C -3.70766997 -1.78184485 -0.79178709  
C -3.52048635 -2.72546172 -1.81588733  
C -2.27379513 -2.90248346 -2.34736156  
H -2.07130861 -3.59039116 -3.15863705  
C -1.21035540 -2.14824700 -1.82386339  
C -2.57644463 -1.05491829 -0.36118558  
C -2.74051261 -0.05476298 0.67423719  
C -0.61065775 2.33502793 2.48804975  
C 0.13997829 -2.34096074 -2.47010899  
C 0.50295264 2.29317307 0.21080807  
H -0.21661355 2.94353318 -0.30367783  
C 1.92917597 2.69413543 -0.14034088  
H 2.60494089 1.84636855 0.01157503  
H 2.01709962 3.01522756 -1.18070579  
C 2.23506832 3.80293870 0.86187094  
H 1.76829493 4.73803425 0.53530079  
H 3.30440760 3.98361564 0.99579346  
C 1.57534623 3.31300282 2.15113354  
C 2.49830651 2.48275948 3.03205585  
H 1.17780077 4.14050388 2.74656129

C 2.55855203 -2.20703197 -2.38184452  
C 2.82227612 -1.14332104 -3.43304372  
H 2.58642054 -3.19281387 -2.86387420  
C 3.53137994 -2.15644455 -1.20275331  
C 2.70445609 -2.63733673 -0.01739087  
C 1.34515464 -2.00254893 -0.28399983  
H 3.11675453 -2.33745503 0.94892836  
H 2.61583328 -3.72866988 -0.03240126  
H 4.42285824 -2.75997496 -1.38787174  
H 0.52433103 -2.54210806 0.18658531  
H 1.31015956 -0.97003949 0.07702852  
H 3.85090280 -1.12053800 -1.03874171  
H 3.82187462 -1.28109753 -3.85711932  
H 2.76956749 -0.14587431 -2.98566484  
H 2.08880305 -1.21598995 -4.23738003  
H 0.26025397 1.26267779 -0.03937989  
H 1.93665028 2.07370615 3.87435579  
H 3.30293870 3.11071301 3.42705989  
H 2.94510627 1.65769720 2.46934319

**Minor conformer form**

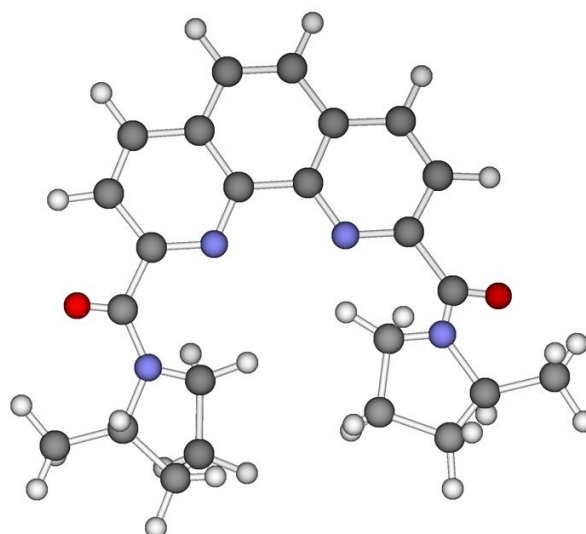

PBE/L1 theoretical level

E= -1299.087480

G= 247.7569 kcal/mol, H= 301.4334 kcal/mol, U= 300.8409 kcal/mol, S= 180.0320 cal/mol at T= 298.150 K

|   |             |             |             |
|---|-------------|-------------|-------------|
| H | -4.89116430 | 3.25505471  | 0.75725436  |
| H | -4.69886923 | -2.91718698 | -2.04866815 |
| N | -1.52963018 | 1.30465138  | 0.40752789  |
| N | 0.73390883  | 2.41782284  | 1.87364864  |
| N | -1.43725765 | -1.14430010 | -0.86070716 |
| N | 1.07847488  | -2.43997884 | -1.79628038 |
| O | -0.22122470 | 4.41969728  | 1.34955943  |
| O | -0.13203956 | -4.34091091 | -1.49152267 |
| C | -1.57196939 | 2.50979757  | 0.96133316  |
| C | -2.75993705 | 3.27005410  | 1.08569753  |
| H | -2.69327092 | 4.27237844  | 1.51138139  |
| C | -3.94474506 | 2.71514630  | 0.65742332  |
| C | -3.94010949 | 1.42779970  | 0.06985374  |
| C | -5.13558674 | 0.79533279  | -0.39444286 |
| H | -6.08504534 | 1.32717001  | -0.28122607 |
| C | -5.09703684 | -0.44535160 | -0.96434051 |
| H | -6.01554060 | -0.92812091 | -1.31130898 |
| C | -3.85801148 | -1.14035439 | -1.12636423 |
| C | -3.78092146 | -2.42562962 | -1.71266687 |
| C | -2.55644488 | -3.04052544 | -1.84555173 |
| H | -2.43965554 | -4.04496336 | -2.25425649 |
| C | -1.39632463 | -2.34454608 | -1.42532468 |
| C | -2.63709307 | -0.54400700 | -0.69086766 |
| C | -2.68145990 | 0.76562029  | -0.05245718 |
| C | -0.29084423 | 3.18942142  | 1.41407228  |
| C | -0.08583107 | -3.10953045 | -1.56751525 |
| C | 0.77267826  | 0.95197284  | 2.06394362  |
| H | 0.75297534  | 0.43658605  | 1.09253037  |
| C | 2.09542227  | 0.72445041  | 2.81003332  |

H 1.94410729 0.80544323 3.89854240  
H 2.51446056 -0.27098721 2.59943390  
C 2.98304629 1.87340188 2.30655217  
H 3.36435056 1.64183164 1.29786491  
H 3.84242225 2.07851267 2.96274328  
C 2.01530743 3.06790495 2.24095058  
C 1.91390526 3.84691596 3.55833292  
H 2.28034377 3.77297854 1.43556762  
C 2.34546065 -3.21698785 -1.86887455  
C 2.43838167 -4.08659172 -3.12430811  
H 2.37551761 -3.87508535 -0.98198086  
C 3.44207096 -2.13051820 -1.79458821  
C 2.73900175 -0.89668560 -1.20885456  
C 1.33823895 -0.98932767 -1.82093096  
H 3.24412322 0.04788808 -1.46226883  
H 2.66901469 -0.97264582 -0.11065595  
H 4.30419922 -2.46617270 -1.19918931  
H 0.55789471 -0.45946953 -1.26158583  
H 1.35077357 -0.62025005 -2.86484885  
H 3.80258298 -1.90515339 -2.81317210  
H 3.40286756 -4.62028170 -3.13665342  
H 2.37563252 -3.46378207 -4.03150129  
H 1.62484658 -4.82470417 -3.13137531  
H -0.10130345 0.60464013 2.63564873  
H 1.12481022 4.60733080 3.47660613  
H 2.86968732 4.35572290 3.76429009  
H 1.68480945 3.17852187 4.40349674

**TS**

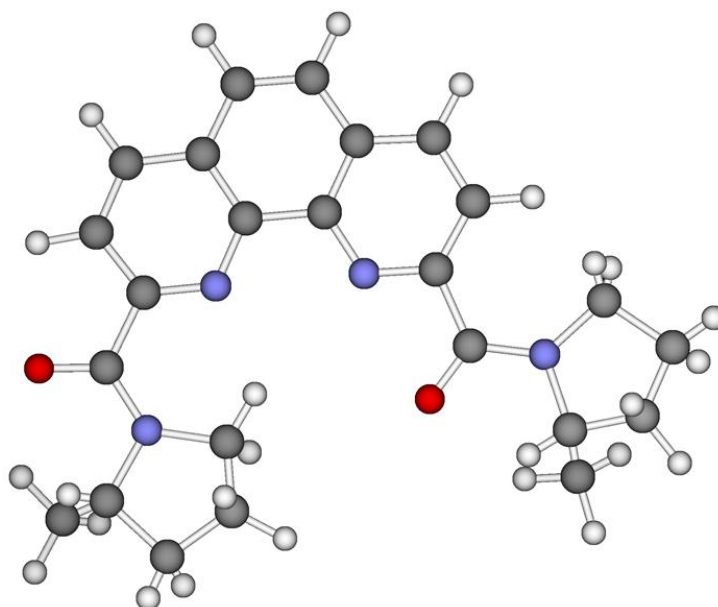

PBE/L1 theoretical level

E= -1299.072438

G= 248.5127 kcal/mol, H= 300.7382 kcal/mol, U= 300.1457 kcal/mol, S= 175.1651 cal/mol at T= 298.150 K

|   |             |             |             |
|---|-------------|-------------|-------------|
| H | -4.62454844 | 2.13492370  | 1.32213736  |
| H | -4.51352358 | -3.64955115 | -2.26453853 |
| N | -1.28448832 | 0.41437224  | 0.34501821  |
| N | 0.42612353  | 3.09589767  | 2.15483689  |
| N | -1.23474753 | -1.88351119 | -1.13491285 |
| N | 1.31409347  | -3.03149438 | -1.98126042 |
| O | 1.10392749  | 1.29997921  | 0.96801269  |
| O | 0.09056699  | -4.81836271 | -2.67127037 |
| C | -1.27008045 | 1.53819871  | 1.05863452  |
| C | -2.47363448 | 2.18983388  | 1.42783439  |
| H | -2.47669721 | 3.10803747  | 2.00765920  |
| C | -3.68602204 | 1.64599955  | 1.04382825  |
| C | -3.71872640 | 0.45525563  | 0.29219100  |
| C | -4.93285513 | -0.17097387 | -0.13445356 |
| H | -5.88576603 | 0.29653919  | 0.13136014  |
| C | -4.90510845 | -1.33137894 | -0.85531819 |

H -5.83659601 -1.80896759 -1.17449772  
C -3.66396213 -1.95128906 -1.20940721  
C -3.58931732 -3.15793443 -1.94548416  
C -2.35799789 -3.69890904 -2.24459219  
H -2.22807574 -4.63415861 -2.79093075  
C -1.19018245 -3.01512122 -1.82155561  
C -2.43141794 -1.35524797 -0.81572586  
C -2.45476651 -0.12220485 -0.03499721  
C 0.17219353 1.97468221 1.39183497  
C 0.13262308 -3.68361115 -2.18123889  
C -0.48006585 4.03231144 2.84165668  
H -1.10138297 3.50706077 3.59028339  
C 0.46151942 5.03402233 3.53164935  
H 0.67230785 5.87857771 2.85656929  
H 0.01828748 5.43906975 4.45362520  
C 1.73469365 4.21373463 3.77420855  
H 1.60838270 3.56655955 4.65810013  
H 2.62641525 4.83959246 3.92918229  
C 1.84825385 3.35347867 2.50661230  
C 2.60751843 4.03179312 1.36060429  
H 2.31892300 2.37798381 2.70680666  
C 2.56560588 -3.76061559 -2.32914186  
C 2.75307059 -3.92138648 -3.83933854  
H 2.49203014 -4.76572180 -1.87642014  
C 3.67927909 -2.92630267 -1.65880156  
C 2.95662642 -2.08884740 -0.59492069  
C 1.62170315 -1.77061296 -1.27004254  
H 3.49973083 -1.17451429 -0.31382829  
H 2.77913570 -2.68241310 0.31738466  
H 4.47213268 -3.56997418 -1.24878347  
H 0.81397307 -1.48483407 -0.59067738



H 1.74716413 -0.94963759 -2.00142860  
H 4.13912439 -2.26010966 -2.40952420  
H 3.70049691 -4.44746161 -4.04233360  
H 2.79244256 -2.93529487 -4.33011961  
H 1.92561150 -4.50772953 -4.26174498  
H -1.14519012 4.54976702 2.13153529  
H 2.55190325 3.40198755 0.46158564  
H 3.66822934 4.15336657 1.63459253  
H 2.19106293 5.02514601 1.12954569

**L4 (meso-form)**

**Major conformer form**

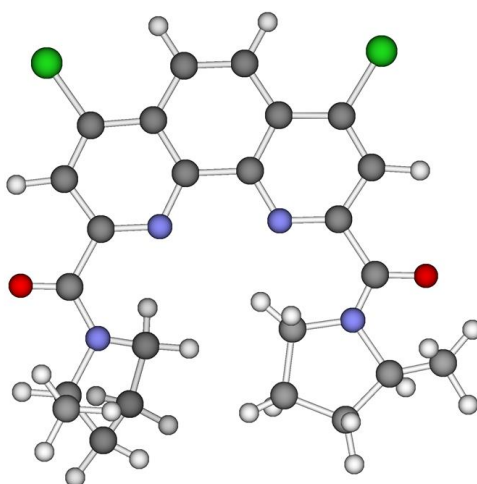

PBE/L1 theoretical level

E= -2220.895107

G= 233.1652 kcal/mol, H= 291.0904 kcal/mol, U= 290.4979 kcal/mol, S= 194.2819 cal/mol at T= 298.150 K

N -1.68222964 1.19140697 0.12522300  
N 0.36680117 2.64804387 1.54559672  
N -1.28667235 -1.36126566 -0.74221671  
N 1.42162895 -2.50645471 -1.15295625  
O -0.68017685 4.50255966 0.72132540  
O 0.34081659 -4.49176216 -0.90728408  
C -1.85979140 2.45458055 0.48864168  
C -3.09575200 3.13286138 0.39979583

H -3.14234734 4.18658209 0.67506033  
C -4.19050980 2.42900062 -0.04593609  
C -4.06047964 1.07118392 -0.44292381  
C -5.14549446 0.27641574 -0.91724563  
H -6.13616896 0.73077363 -0.97229922  
C -4.95670271 -1.02339101 -1.29381537  
H -5.79489374 -1.62493312 -1.64955890  
C -3.66495657 -1.62468290 -1.23926365  
C -3.39779949 -2.96649885 -1.62100279  
C -2.12110925 -3.47316957 -1.54994142  
H -1.87900436 -4.50614977 -1.79825509  
C -1.08199978 -2.61389494 -1.12216914  
C -2.54209781 -0.86836112 -0.78194147  
C -2.74806333 0.51065516 -0.34872717  
C -0.67403048 3.29034472 0.94225085  
C 0.29624921 -3.26584053 -1.04446518  
C 0.33344966 1.33299220 2.21458149  
H 0.74580848 0.54876965 1.55800033  
C 1.21917808 1.55297816 3.44749093  
H 0.63661772 2.03947544 4.24745893  
H 1.62491417 0.60813475 3.83947134  
C 2.30049539 2.50287104 2.91682386  
H 3.05127931 1.93410778 2.34049368  
H 2.82709312 3.05454803 3.70964456  
C 1.54183137 3.45314169 1.97138822  
C 2.37403655 3.94259524 0.78641802  
C 2.74311996 -3.18239212 -1.03016794  
C 3.06184912 -4.08315897 -2.22503304  
C 3.73719931 -2.01109934 -0.86515421  
C 2.87479162 -0.81796026 -0.42796624  
C 1.57663584 -1.04025340 -1.20908391

H 3.33679199 0.15468705 -0.65640646  
H 2.66932583 -0.86214143 0.65504092  
H 4.20921946 -1.79220152 -1.83847976  
H 4.53681421 -2.25778580 -0.15098555  
H 1.70086896 -0.71161753 -2.25904894  
H 0.69287878 -0.54845852 -0.78617066  
H -0.69579154 1.04807281 2.46693707  
H 4.05743933 -4.53715658 -2.09190583  
H 3.07029772 -3.49811172 -3.15900111  
H 2.31537676 -4.88517570 -2.30316067  
H 1.76732063 4.59166145 0.14000200  
H 2.74684644 3.08830643 0.19840118  
H 3.23912001 4.51959324 1.15174556  
H 1.16060185 4.33341694 2.52219272  
H 2.70614982 -3.80594254 -0.11911415  
Cl -5.74820185 3.22545052 -0.12750359  
Cl -4.69857407 -3.99535060 -2.18480062  
PBE0/L1 theoretical level  
E= -2221.033897  
N -1.67378569 1.19222438 0.11864571  
N 0.35832262 2.62424707 1.53430736  
N -1.27857172 -1.35059536 -0.71823096  
N 1.41441977 -2.48073697 -1.12165868  
O -0.67891222 4.46593523 0.73646057  
O 0.34489664 -4.44162941 -0.86019999  
C -1.84771013 2.44129777 0.47854879  
C -3.07459283 3.11490560 0.39058542  
H -3.12584186 4.15951490 0.66705543  
C -4.15862846 2.41618466 -0.05641447  
C -4.02576637 1.06806207 -0.44797421  
C -5.10570574 0.27592626 -0.92359775

H -6.08922338 0.72522348 -0.98353672  
C -4.91638899 -1.01151359 -1.29336262  
H -5.74673891 -1.60822594 -1.65011466  
C -3.62869453 -1.60912251 -1.22946501  
C -3.36284018 -2.94237781 -1.60352445  
C -2.09651804 -3.44460392 -1.52348506  
H -1.85809672 -4.46988440 -1.77057612  
C -1.07019436 -2.58966112 -1.08906627  
C -2.52224779 -0.85956877 -0.77170068  
C -2.72874594 0.51336902 -0.34973374  
C -0.66901487 3.26612639 0.94043136  
C 0.30213934 -3.23179317 -1.00531507  
C 0.31270334 1.31769872 2.19283366  
H 0.70086229 0.53493142 1.53453720  
C 1.20990038 1.51753533 3.40821099  
H 0.64638358 2.00237298 4.21211767  
H 1.60703993 0.57264364 3.78649092  
C 2.28598857 2.45453644 2.87489915  
H 3.01396227 1.88793874 2.28252101  
H 2.82856178 2.98750234 3.65885115  
C 1.52481782 3.41526151 1.96056199  
C 2.34614801 3.91859436 0.78701091  
C 2.72337675 -3.15148878 -1.01018441  
C 3.02733207 -4.05469704 -2.19415355  
C 3.71554685 -1.98888445 -0.87432861  
C 2.86672068 -0.79964739 -0.43843782  
C 1.56655407 -1.02761292 -1.19474411  
H 3.32240963 0.16404654 -0.67853910  
H 2.67671704 -0.83697850 0.63954765  
H 4.16739941 -1.78127766 -1.85073733  
H 4.52119255 -2.22743130 -0.17639531

H 1.67656612 -0.71091741 -2.24104190  
 H 0.70171058 -0.52699769 -0.76683003  
 H -0.70866185 1.04843557 2.45999503  
 H 4.02265167 -4.49440145 -2.07557869  
 H 3.01482630 -3.47970080 -3.12544560  
 H 2.29333520 -4.85881042 -2.25625682  
 H 1.74660766 4.58025312 0.16020101  
 H 2.70373368 3.07754993 0.18500096  
 H 3.21339607 4.47598553 1.15439212  
 H 1.15633118 4.27896214 2.52900290  
 H 2.70324516 -3.76037598 -0.09890726  
 Cl -5.70113945 3.20508432 -0.14596324  
 Cl -4.64777946 -3.96341467 -2.16670823

**Minor conformer form**

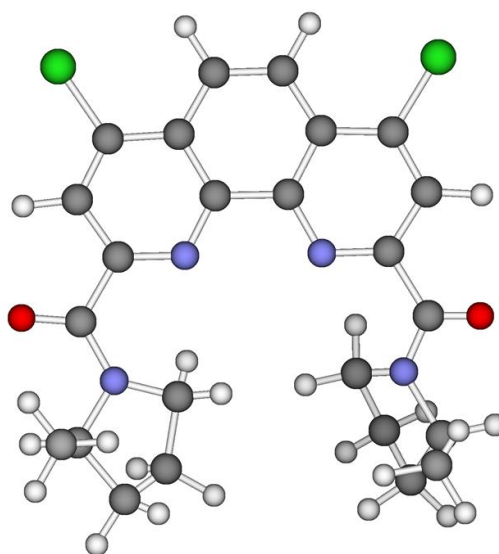

PBE/L1 theoretical level

E= -2220.894257

G= 233.0881 kcal/mol, H= 291.0758 kcal/mol, U= 290.4833 kcal/mol, S= 194.4915 cal/mol at T= 298.150 K

N -1.75721014 1.09174228 0.36511549  
 N 0.08126734 1.86845720 2.45949030  
 N -0.91803122 -0.49026221 -1.70883787  
 N 1.59674275 -1.95862830 -1.71314836

O -1.56395316 3.26438618 3.18371844  
O 1.53811979 -1.51982486 -3.95470357  
C -2.16666126 1.83265114 1.38573778  
C -3.50241423 2.26383710 1.55429065  
H -3.74213147 2.88286591 2.41887093  
C -4.42445803 1.90900636 0.59917164  
C -4.03270626 1.14320695 -0.53103757  
C -4.92053080 0.78690863 -1.58770359  
H -5.96170568 1.10680640 -1.52102017  
C -4.47932529 0.07945841 -2.66909242  
H -5.16126299 -0.17089754 -3.48276353  
C -3.12270451 -0.34909540 -2.76422763  
C -2.60480380 -1.06961513 -3.87326717  
C -1.28398991 -1.45225155 -3.89902759  
H -0.83655465 -1.96269143 -4.75197983  
C -0.48776606 -1.16252315 -2.76921082  
C -2.19841981 -0.05674856 -1.71108973  
C -2.65887713 0.74604887 -0.57875055  
C -1.18958402 2.36314106 2.42919755  
C 0.97237927 -1.57413983 -2.86233497  
C 0.58072102 0.59675020 1.90305042  
H 1.03889835 0.75718421 0.91170895  
C 1.61791301 0.15129536 2.94151711  
H 1.11458838 -0.35277638 3.78343606  
H 2.35978675 -0.54165906 2.51545477  
C 2.22980332 1.48059928 3.39911366  
H 2.96842527 1.83026314 2.65685296  
H 2.73204470 1.41951382 4.37596750  
C 1.03951120 2.45727634 3.43412161  
C 1.42047405 3.89714766 3.08894205  
C 3.02730083 -2.35545778 -1.77796662

C 3.95347834 -1.16239810 -2.01045680  
C 3.25506878 -3.07387090 -0.43470487  
C 1.86685324 -3.59974265 -0.04697176  
C 0.94364429 -2.45659471 -0.48870313  
H 1.76951587 -3.82013726 1.02686870  
H 1.63002563 -4.51594925 -0.61298364  
H 3.60490346 -2.34391117 0.31669173  
H 4.01595974 -3.86379218 -0.52009243  
H 0.89193130 -1.66518128 0.27644557  
H -0.08197879 -2.78782392 -0.70046490  
H -0.24086364 -0.11588620 1.76808667  
H 5.00131607 -1.50310075 -2.03671622  
H 3.84532642 -0.42550051 -1.19842172  
H 3.71719122 -0.68170589 -2.96984673  
H 0.53039151 4.54035568 3.10868239  
H 1.88355696 3.94422269 2.09026313  
H 2.14546037 4.27512503 3.82811069  
H 0.55231684 2.44842958 4.42694902  
H 3.14071274 -3.06055045 -2.62294245  
Cl -6.08883619 2.42695642 0.77806920  
Cl -3.64085865 -1.47091854 -5.22745848

**TS**

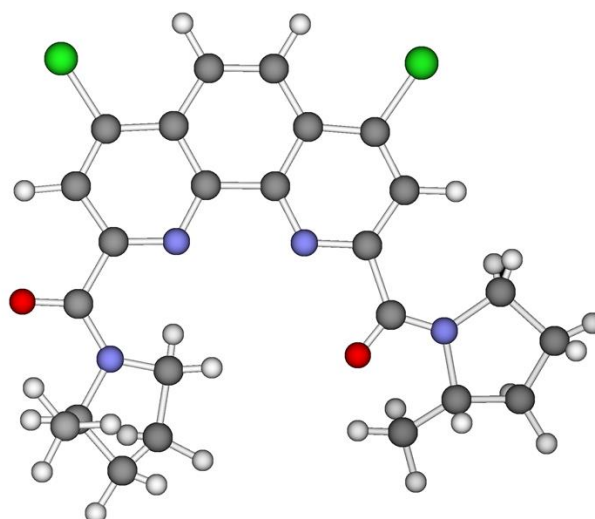

PBE/L1 theoretical level

E= -2220.878515

G= 234.3500 kcal/mol, H= 290.3729 kcal/mol, U= 289.7804 kcal/mol, S= 187.9019 cal/mol at T= 298.150 K

|   |             |             |             |
|---|-------------|-------------|-------------|
| N | -1.84602427 | 1.50387716  | 0.67076892  |
| N | -0.03508796 | 2.69516277  | 2.52328300  |
| N | -0.89647794 | -0.33031118 | -1.07796609 |
| N | 1.73782229  | -2.60859275 | -1.97596586 |
| O | -1.72483873 | 4.13628435  | 3.05437279  |
| O | 1.75278544  | -0.48464817 | -1.17930853 |
| C | -2.29295278 | 2.38992143  | 1.54686844  |
| C | -3.65203977 | 2.76564026  | 1.65035832  |
| H | -3.92807341 | 3.51976371  | 2.38789320  |
| C | -4.55446148 | 2.17851067  | 0.79306692  |
| C | -4.12229061 | 1.22849441  | -0.17120174 |
| C | -4.98672104 | 0.58980596  | -1.11115205 |
| H | -6.04850245 | 0.84226054  | -1.09341550 |
| C | -4.50454617 | -0.31318820 | -2.01644301 |
| H | -5.17486334 | -0.79177457 | -2.73255849 |
| C | -3.11966348 | -0.65683889 | -2.04341793 |
| C | -2.54026723 | -1.58761871 | -2.93532443 |
| C | -1.19167876 | -1.88571405 | -2.87760806 |
| H | -0.79359877 | -2.61027956 | -3.58136392 |
| C | -0.38794252 | -1.22727644 | -1.91818666 |
| C | -2.20833206 | -0.05210707 | -1.12200856 |
| C | -2.72598338 | 0.92833525  | -0.16827513 |
| C | -1.32486558 | 3.13344789  | 2.45596957  |
| C | 1.13171434  | -1.40009689 | -1.70431852 |
| C | 0.50611806  | 1.35962677  | 2.17686272  |
| H | 0.88007927  | 1.33492100  | 1.14034426  |
| C | 1.63464427  | 1.17320693  | 3.19843006  |
| H | 1.22472012  | 0.80550188  | 4.15419960  |



H 2.38927221 0.45520821 2.84356713  
C 2.18464851 2.59410048 3.36310601  
H 2.84388852 2.84223938 2.51314235  
H 2.75537992 2.74123383 4.29228783  
C 0.93630213 3.49386406 3.31795883  
C 1.20236659 4.87254667 2.71206975  
C 3.12761688 -2.81329441 -1.47348011  
C 3.23260593 -2.72919917 0.04943538  
C 3.49219966 -4.20203161 -2.01849461  
C 2.70361400 -4.30793905 -3.32432342  
C 1.37142897 -3.62015462 -2.98538017  
H 2.55499744 -5.34300423 -3.66630530  
H 3.21425772 -3.74945545 -4.12576628  
H 3.15533400 -4.97460032 -1.30530977  
H 4.57816792 -4.31233978 -2.15478754  
H 0.63478607 -4.34295273 -2.58842254  
H 0.95403779 -3.15088558 -3.88762498  
H -0.27322772 0.59284914 2.25357318  
H 4.27153683 -2.93496585 0.35402918  
H 2.57611036 -3.47851992 0.52047694  
H 2.95196700 -1.72781670 0.40023100  
H 0.27631843 5.46242714 2.68555641  
H 1.60133576 4.77117348 1.69004548  
H 1.94547570 5.40754938 3.32573509  
H 0.51244336 3.62797141 4.33117819  
H 3.77709103 -2.03696680 -1.92051935  
Cl -6.24862862 2.61841822 0.89357179  
Cl -3.52999902 -2.39177036 -4.13945341

## L4 (rac-form)

### Major conformer form

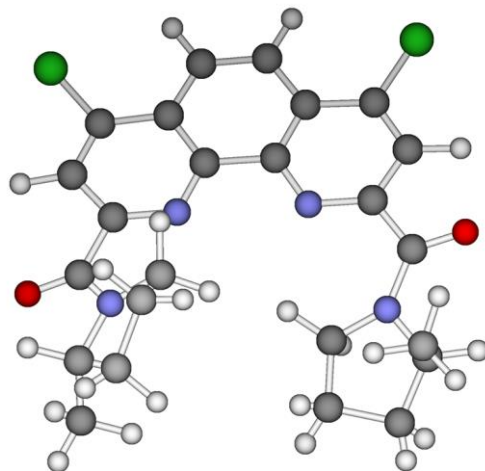

PBE/L1 theoretical level

E= -2220.896082

G= 233.0034 kcal/mol, H= 291.1060 kcal/mol, U= 290.5136 kcal/mol, S= 194.8772 cal/mol at T= 298.150 K

Cl -5.45170927 3.56670976 -1.11302674

Cl -4.53442144 -3.73248506 -2.95739841

N -1.58054936 1.32147682 -0.30457449

N 0.68018275 2.92892408 0.55662441

N -1.28157794 -1.32147396 -0.87586540

N 0.99699110 -2.80276632 0.08071533

O -0.90486568 4.31713676 1.42781866

O 0.56525958 -4.21083403 -1.66365933

C -1.72142029 2.60071635 0.00862123

C -2.91415167 3.32936859 -0.20293280

H -2.96268010 4.36718750 0.12655167

C -3.97020626 2.68436813 -0.80444098

C -3.86654592 1.31533122 -1.17008376

C -4.91205454 0.57678026 -1.79862273

H -5.85104465 1.08844972 -2.01647496

C -4.74712896 -0.73956603 -2.12662911

H -5.55123329 -1.29361761 -2.61383438

C -3.52806163 -1.42332590 -1.84258127  
C -3.29165936 -2.78675914 -2.16442990  
C -2.08570290 -3.37581086 -1.86197448  
H -1.84735262 -4.40645361 -2.12506557  
C -1.11352885 -2.59755683 -1.19464409  
C -2.45293283 -0.73332000 -1.20030785  
C -2.62202477 0.67898721 -0.87110782  
C -0.60513008 3.35459042 0.71729457  
C 0.21959510 -3.27997327 -0.93364310  
C 1.21417189 1.98180377 -0.44954205  
H 1.05458772 2.38132906 -1.46865439  
C 2.70949793 1.92915845 -0.12012754  
H 2.89790654 1.18329751 0.66989315  
H 3.31182861 1.65442121 -0.99884701  
C 3.00485587 3.34531426 0.39801905  
H 3.09906435 4.04331875 -0.45042232  
H 3.92618346 3.40703344 0.99664760  
C 1.75873065 3.69536185 1.23128068  
C 1.87329805 3.31254387 2.71104932  
H 1.50329387 4.76624775 1.16635692  
C 2.31858444 -3.44214702 0.31589049  
H 2.15993547 -4.53648996 0.34150693  
C 2.72612953 -2.91681242 1.70506954  
C 1.39445770 -2.58841419 2.39163351  
C 0.56147462 -2.00455832 1.24362195  
H 1.49914420 -1.88043666 3.22751760  
H 0.91925204 -3.50777078 2.77224278  
H 3.33363104 -3.65139937 2.25417566  
H -0.52001768 -2.10041666 1.40150881  
H 0.78082001 -0.93436551 1.09173167  
H 3.32673717 -1.99751770 1.58809435

H 0.70252424 1.01414728 -0.38378796  
C 3.32718349 -3.12100530 -0.78668237  
H 4.29273033 -3.60114145 -0.55869418  
H 3.48631883 -2.03293967 -0.85897452  
H 2.96668077 -3.50135565 -1.75233042  
H 2.14880729 2.25260997 2.83006477  
H 0.91334713 3.49168158 3.21630740  
H 2.64279413 3.93241882 3.19912148

PBE0/L1 theoretical level

E= -2221.035329

Cl -5.61928844 1.43185532 3.04035950  
Cl -4.81161594 -3.65280104 -2.45042539  
N -1.65842891 0.64450246 1.04330790  
N 0.46316168 2.50281620 1.64189887  
N -1.34632182 -1.24336028 -0.86268091  
N 1.25822496 -2.03391933 -1.72391570  
O -0.59763700 2.74630952 3.61756396  
O 0.21440171 -2.68725348 -3.61781073  
C -1.78412783 1.54687285 1.98419225  
C -2.99269700 1.81009316 2.64751506  
H -3.00826883 2.54090858 3.44473720  
C -4.10170317 1.11398077 2.26125789  
C -4.01658535 0.14182436 1.24299037  
C -5.12345266 -0.62071401 0.78111416  
H -6.09359312 -0.44960421 1.23107171  
C -4.97588491 -1.53903663 -0.20162863  
H -5.82712793 -2.11031508 -0.55074316  
C -3.70791292 -1.77773809 -0.79817194  
C -3.49115491 -2.71353841 -1.83064580  
C -2.24299002 -2.88466692 -2.35655713  
H -2.04045868 -3.56610990 -3.17196822

C -1.19170690 -2.12926483 -1.81679571  
C -2.57409835 -1.05368948 -0.36383435  
C -2.73737049 -0.05500160 0.67582166  
C -0.58110124 2.32098579 2.47612929  
C 0.16284987 -2.31793380 -2.45915413  
C 0.51265448 2.28799725 0.18995708  
H -0.21109080 2.94156790 -0.31417331  
C 1.93598330 2.69054151 -0.17090154  
H 2.61258030 1.84156191 -0.03019827  
H 2.01470327 3.01790071 -1.20992529  
C 2.25122428 3.79322672 0.83511734  
H 1.78182685 4.73033524 0.51843202  
H 3.32176375 3.97253132 0.96025425  
C 1.60342956 3.29600573 2.12748170  
C 2.53256941 2.45848060 2.99457884  
H 1.21172857 4.12001133 2.73142028  
C 2.57990646 -2.17982602 -2.35680938  
C 2.84532905 -1.10892379 -3.39996767  
H 2.61281109 -3.16269517 -2.84423137  
C 3.54526305 -2.13419747 -1.17158651  
C 2.71350145 -2.62781334 0.00510168  
C 1.35334873 -1.99581110 -0.26335883  
H 3.11910534 -2.33426189 0.97609866  
H 2.62896156 -3.71921921 -0.01913430  
H 4.43992710 -2.73301458 -1.35606885  
H 0.53235304 -2.54321718 0.19794530  
H 1.31262612 -0.96646911 0.10587833  
H 3.86000991 -1.09843314 -0.99789453  
H 3.84657812 -1.24278569 -3.82116079  
H 2.78976727 -0.11431795 -2.94670248  
H 2.11570239 -1.17743301 -4.20815182

H 0.26870465 1.25872612 -0.06418513  
H 1.97860873 2.04429698 3.83948350  
H 3.34112740 3.08308506 3.38656926  
H 2.97388482 1.63694835 2.42250323

**Minor conformer form**

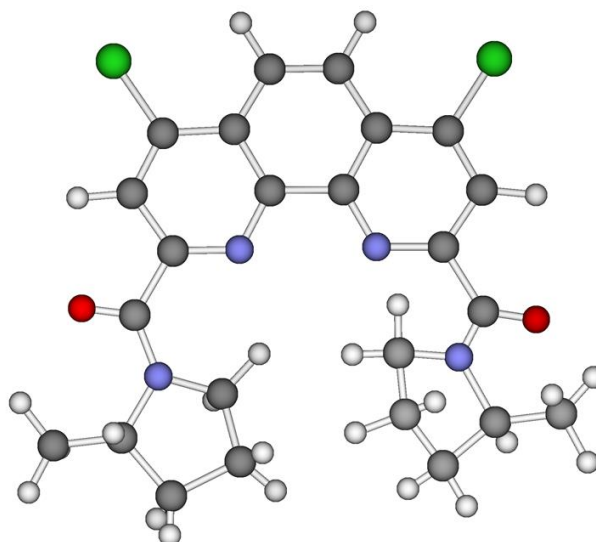

E= -2220.894088

G= 233.3655 kcal/mol, H= 291.1625 kcal/mol, U= 290.5700 kcal/mol, S= 193.8521 cal/mol at T= 298.150 K

Cl -5.39042330 3.64007401 0.83660161  
Cl -5.18540668 -3.27782488 -2.24985647  
N -1.51676524 1.29036009 0.39953786  
N 0.75557607 2.39699435 1.86616766  
N -1.42682183 -1.13336730 -0.85242194  
N 1.09755623 -2.42172050 -1.78426301  
O -0.18413778 4.40142107 1.31934750  
O -0.10481817 -4.32725096 -1.46890891  
C -1.54618192 2.49631667 0.94908994  
C -2.72037482 3.27299500 1.07484436  
H -2.64877892 4.27751732 1.49157560  
C -3.90848613 2.72488213 0.65114599  
C -3.93652892 1.43141448 0.06417760  
C -5.12720966 0.79592359 -0.39577258

H -6.07441425 1.32660127 -0.28598449  
C -5.09018183 -0.44858593 -0.95817673  
H -6.00788784 -0.93035990 -1.29959285  
C -3.85728955 -1.14624822 -1.11962414  
C -3.75021863 -2.43907261 -1.69805026  
C -2.52350783 -3.04728937 -1.82797611  
H -2.40458775 -4.05401850 -2.22741485  
C -1.37547719 -2.33465171 -1.41074479  
C -2.63277221 -0.54760051 -0.68919492  
C -2.67603040 0.76650321 -0.05423302  
C -0.25982466 3.17298794 1.39777839  
C -0.06100222 -3.09680986 -1.55109680  
C 0.77773559 0.93310577 2.07625890  
H 0.75487596 0.40555227 1.11145687  
C 2.09638286 0.70108783 2.82822084  
H 1.94285619 0.79528213 3.91524482  
H 2.50577545 -0.30074975 2.62976670  
C 2.99721885 1.83528340 2.31475282  
H 3.38005638 1.58897567 1.31026399  
H 3.85598636 2.03904819 2.97199750  
C 2.04233336 3.03894091 2.23242307  
C 1.94246900 3.83260870 3.54090476  
H 2.31740642 3.73214841 1.42025721  
C 2.36927247 -3.19252276 -1.85862684  
C 2.46126103 -4.06859207 -3.10937166  
H 2.40699792 -3.84442711 -0.96766031  
C 3.45953679 -2.09907913 -1.79654884  
C 2.75245762 -0.86531949 -1.21586072  
C 1.34929001 -0.96953464 -1.82040596  
H 3.25078487 0.08022261 -1.47855020  
H 2.68804741 -0.93371528 -0.11683956

H 4.32613277 -2.42580056 -1.20284271  
H 0.56987792 -0.43828905 -1.26134217  
H 1.35446739 -0.60902590 -2.86714745  
H 3.81406665 -1.87839401 -2.81816077  
H 3.43069887 -4.59302187 -3.12392378  
H 2.38794661 -3.45154047 -4.01961470  
H 1.65527630 -4.81492424 -3.10870457  
H -0.10098964 0.60349554 2.65117145  
H 1.16207242 4.60071135 3.44859219  
H 2.90261054 4.33353233 3.74534273  
H 1.70309126 3.17575073 4.39199162

**TS**

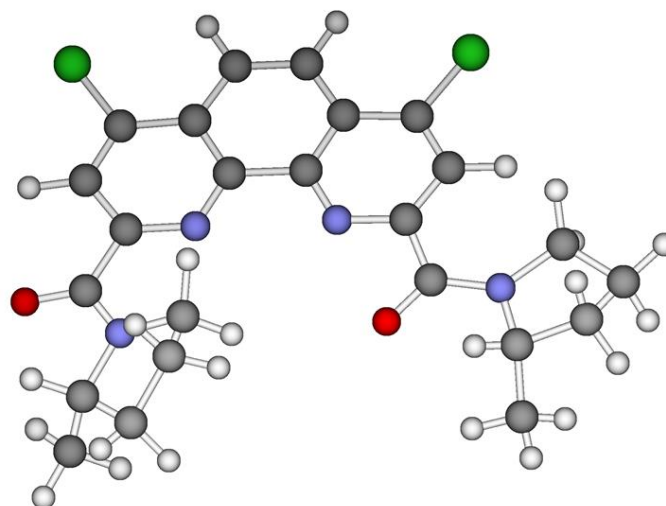

PBE/L1 theoretical level

E= -2220.880462

G= 234.6186 kcal/mol, H= 290.4846 kcal/mol, U= 289.8921 kcal/mol, S= 187.3754 cal/mol at T= 298.150 K

Cl -5.09773159 2.44770122 1.52032888  
Cl -5.02832413 -4.07844162 -2.38468146  
N -1.25864923 0.40429342 0.24470612  
N 0.49775940 3.10674095 1.97679257  
N -1.22646952 -1.88627470 -1.19424844  
N 1.28617561 -3.05650520 -1.83911824



O 1.14468193 1.31529737 0.76440358  
O 0.13595940 -4.43139982 -3.25617456  
C -1.22389936 1.53635097 0.94150865  
C -2.41082788 2.19236064 1.34455776  
H -2.40995789 3.12109208 1.90513933  
C -3.63024831 1.63140452 1.01323402  
C -3.70349503 0.42425457 0.28268403  
C -4.91706705 -0.22879855 -0.08790895  
H -5.86505508 0.22576065 0.20516859  
C -4.89724588 -1.40050471 -0.79099667  
H -5.83006573 -1.89566875 -1.06698930  
C -3.66590667 -2.00632405 -1.18568313  
C -3.57238197 -3.21983171 -1.91904306  
C -2.34429884 -3.72955418 -2.27468681  
H -2.22047782 -4.64040565 -2.86113071  
C -1.18826985 -3.01776910 -1.88034797  
C -2.42525959 -1.38507652 -0.84737766  
C -2.44018769 -0.13918696 -0.08101075  
C 0.22677712 1.98637784 1.22273922  
C 0.14124691 -3.57525134 -2.36686802  
C -0.39276156 4.03450441 2.69694304  
H -0.98782462 3.50062394 3.46027684  
C 0.56382322 5.03808117 3.36340594  
H 0.74367279 5.89052343 2.68948126  
H 0.14854771 5.43063927 4.30342770  
C 1.85188675 4.22773409 3.55559707  
H 1.76270306 3.57367086 4.43886757  
H 2.74253583 4.86104965 3.68350744  
C 1.92962468 3.37690449 2.27913332  
C 2.63951111 4.06970882 1.11064231  
H 2.41621709 2.40486240 2.45638990

C 2.58691478 -3.51952672 -2.39193773  
C 2.80032229 -3.08217764 -3.84161615  
H 2.59615064 -4.62529945 -2.35072517  
C 3.61900496 -2.92895341 -1.41464806  
C 2.85267019 -2.78559399 -0.09527064  
C 1.46093869 -2.33453941 -0.55538392  
H 3.30603266 -2.05672121 0.59277815  
H 2.78657818 -3.75915504 0.41911221  
H 4.51364946 -3.56512117 -1.33861935  
H 0.66926008 -2.60593843 0.15288088  
H 1.40649867 -1.24322510 -0.69520319  
H 3.93502498 -1.93451607 -1.77511752  
H 3.78611279 -3.43055987 -4.19066381  
H 2.77086544 -1.98341572 -3.91840553  
H 2.02445650 -3.51407576 -4.48803234  
H -1.08086920 4.55334473 2.01008201  
H 2.55846763 3.44583201 0.20938830  
H 3.70803094 4.20038748 1.34714055  
H 2.20517254 5.06031084 0.90157181

## Complexes

### L1\*La(NO<sub>3</sub>)<sub>3</sub>

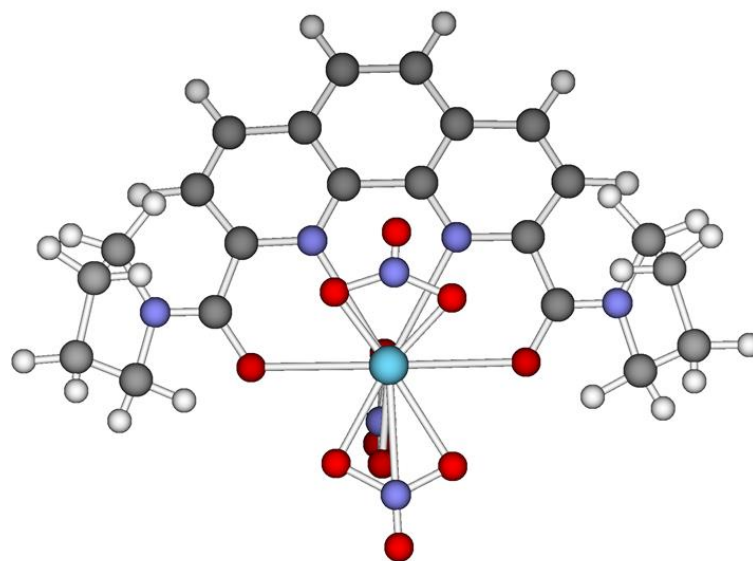

PBE/L1 theoretical level

E= -10556.886345

G= 230.8106 kcal/mol, H= 304.9870 kcal/mol, U= 304.3945 kcal/mol, S= 248.7887 cal/mol at T= 298.150 K

H -4.52806473 3.27118492 -0.70783961  
H -3.50268483 -2.97827387 -3.28968263  
N -1.47856951 1.08658290 0.30045471  
N -0.09366491 3.89596319 1.94958937  
N -1.07944095 -1.37790608 -0.70982087  
N 1.19820797 -4.01222277 -1.26134396  
O -0.12904730 1.71322906 2.53076386  
O 0.53269392 -3.03243709 0.66759455  
C -1.62093258 2.31493306 0.79196364  
C -2.71388578 3.13975191 0.45021725  
H -2.82580471 4.12592649 0.90344417  
C -3.65971041 2.66287255 -0.44035134  
C -3.50651670 1.37853110 -1.00618947  
C -4.42143106 0.80737954 -1.94949973  
H -5.29259348 1.39412987 -2.25376987  
C -4.21711206 -0.44282344 -2.46414804  
H -4.92285490 -0.86542672 -3.18464994  
C -3.08114195 -1.22636688 -2.07821369  
C -2.81223440 -2.51993394 -2.57629704  
C -1.68336511 -3.19966817 -2.15315914  
H -1.46688008 -4.20463085 -2.51974487  
C -0.83188897 -2.58589005 -1.21068501  
C -2.15833735 -0.69797117 -1.13352609  
C -2.37382770 0.62610191 -0.58916259  
C -0.56019324 2.64100885 1.81921852  
C 0.36009955 -3.24029756 -0.54925495  
C -0.22750410 5.01040459 0.99001980  
H -1.03639483 5.69682217 1.30262291  
C 1.13614762 5.70734262 1.08515859

H 1.86601686 5.16614485 0.46088079  
H 1.08957326 6.75415945 0.75052357  
C 1.48930871 5.55162144 2.57258773  
H 0.93055618 6.28643847 3.17624736  
H 2.56166410 5.68503189 2.77602172  
C 1.02790463 4.12573433 2.89630842  
H 1.80914855 3.36962700 2.70648909  
H 0.68314916 3.99076056 3.93308640  
C 2.42460465 -4.51393747 -0.58797944  
H 2.16551018 -5.30457926 0.13315034  
H 2.87730002 -3.68224955 -0.02132681  
C 3.30622387 -4.99460316 -1.74775875  
C 2.85963655 -4.11032343 -2.92267060  
C 1.33916855 -4.04470015 -2.73119307  
H 3.13644481 -4.51389790 -3.90781784  
H 3.27982426 -3.09639168 -2.81910706  
H 3.10917091 -6.05643559 -1.97225523  
H 4.37489796 -4.88683462 -1.51177883  
H 0.88793933 -3.15030503 -3.18356919  
La 0.55687028 -0.54815400 1.45456898  
N -1.43108499 -1.54435408 3.44929218  
O -0.17494348 -1.44090831 3.73142600  
O -1.76759434 -1.19087648 2.23628426  
O -2.25597286 -1.94175220 4.25006580  
N 3.20336342 -0.73231447 2.81889963  
O 2.48524618 0.35161147 2.83371592  
O 2.68211341 -1.73351550 2.17585111  
O 4.28763008 -0.80197847 3.36563444  
N 1.96410143 0.57403320 -0.99773806  
O 2.46891284 1.02194226 -2.01469922  
O 1.88594496 -0.70144236 -0.77274525

O 1.46768785 1.34006739 -0.07905519  
H 0.85301238 -4.94699287 -3.14674330  
H -0.44639614 4.63105822 -0.01830472  
PBE0/L1 theoretical level  
E= -10556.761402  
H -4.50731087 3.24989724 -0.71083337  
H -3.46190643 -2.96149230 -3.26079583  
N -1.49956954 1.07727027 0.31923148  
N -0.09229148 3.83641148 1.93340480  
N -1.09010231 -1.36547375 -0.68106097  
N 1.21024525 -3.93163037 -1.24399614  
O -0.21535704 1.69166577 2.56332183  
O 0.55529588 -2.96132946 0.66465604  
C -1.64252484 2.29117393 0.80508751  
C -2.71902990 3.11632156 0.45641845  
H -2.82584333 4.09745884 0.90250069  
C -3.65081859 2.64312983 -0.43479204  
C -3.49663115 1.36511767 -0.99091095  
C -4.40049171 0.79514480 -1.93808150  
H -5.26277256 1.37692714 -2.24761081  
C -4.19226789 -0.44249591 -2.44596910  
H -4.88585377 -0.86316788 -3.16693020  
C -3.06179333 -1.22070265 -2.05176044  
C -2.78521442 -2.50330353 -2.54657388  
C -1.66256452 -3.17098475 -2.12198830  
H -1.43708050 -4.16560698 -2.48663068  
C -0.82988882 -2.55448532 -1.17977166  
C -2.15975475 -0.69622570 -1.10800612  
C -2.38068986 0.61958092 -0.56865048  
C -0.59385872 2.61027288 1.83529818  
C 0.37441909 -3.18278193 -0.53341162  
C -0.17239182 4.90413761 0.93413758

H -0.94197661 5.63521290 1.21240187  
C 1.21388113 5.53346205 1.00351810  
H 1.91180277 4.93030405 0.41444400  
H 1.22051430 6.55708981 0.62297094  
C 1.55098188 5.43017340 2.48840737  
H 1.02677858 6.21065044 3.05007291  
H 2.61969018 5.52189827 2.69179726  
C 1.02537131 4.05174208 2.86911201  
H 1.76756084 3.26121521 2.71588421  
H 0.67385042 3.98132396 3.90110469  
C 2.44037104 -4.40651941 -0.58645624  
H 2.20105267 -5.16886091 0.15863106  
H 2.90516162 -3.56422877 -0.06321718  
C 3.29004526 -4.91835022 -1.74290156  
C 2.83250356 -4.05864954 -2.91799951  
C 1.32578015 -3.97942424 -2.70324349  
H 3.08762407 -4.47831392 -3.89342380  
H 3.25945973 -3.05385685 -2.83977580  
H 3.07543540 -5.97394228 -1.94060969  
H 4.35650587 -4.82019424 -1.53086472  
H 0.88004726 -3.09285998 -3.15735531  
La 0.51794839 -0.52735049 1.49316382  
N -1.46797037 -1.62853479 3.39965630  
O -0.23757119 -1.54166281 3.69028330  
O -1.79207051 -1.21201479 2.23455119  
O -2.28205204 -2.07035065 4.15954685  
N 3.15771198 -0.63921475 2.83673811  
O 2.39055824 0.37294418 2.92704058  
O 2.70854998 -1.60426569 2.13840318  
O 4.23076868 -0.67858309 3.36831355  
N 1.89353228 0.67819297 -0.91496646

O 2.38161325 1.15921569 -1.90269518  
 O 1.78606176 -0.57798684 -0.76071090  
 O 1.44751811 1.39544082 0.03334945  
 H 0.83208835 -4.87567711 -3.09968829  
 H -0.40307987 4.49714756 -0.05176474

**L1\*Nd(NO<sub>3</sub>)<sub>3</sub>**

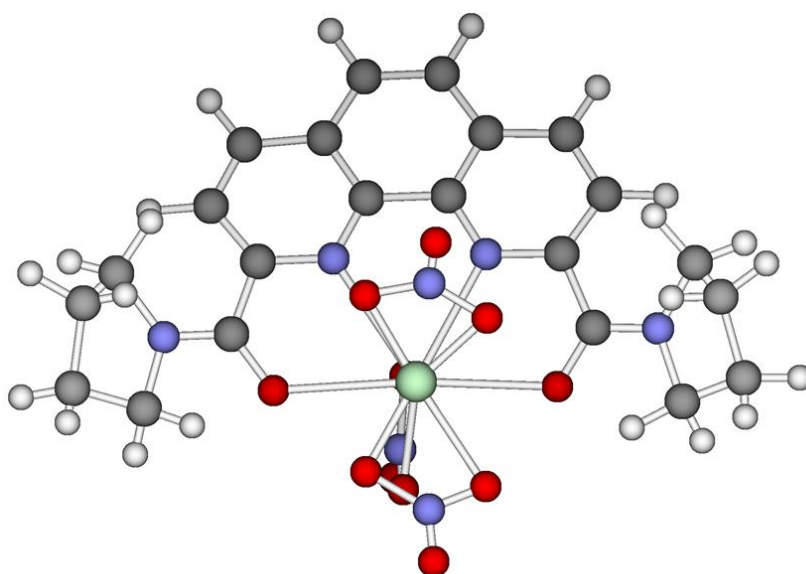

PBE/L1 theoretical level

E= -11688.280784

G= 232.0137 kcal/mol, H= 304.8703 kcal/mol, U= 304.2778 kcal/mol, S= 244.3622 cal/mol at T= 298.150

H -4.48643637 3.28538752 -0.70057136  
 H -3.46296883 -2.93699884 -3.34870839  
 N -1.42432582 1.09528065 0.26259980  
 N -0.10647288 3.91030550 2.01392865  
 N -1.04427326 -1.36418104 -0.74703217  
 N 1.16663122 -4.08239746 -1.19836283  
 O 0.05246217 1.69004607 2.37779999  
 O 0.49634355 -3.00909114 0.67906213  
 C -1.56385636 2.32015705 0.76759195  
 C -2.66697574 3.14053321 0.44793436  
 H -2.78803015 4.11638689 0.91924137

C -3.61468983 2.67595863 -0.44755721  
C -3.45721149 1.40307546 -1.03610456  
C -4.36885262 0.84503686 -1.99011254  
H -5.23730469 1.43748403 -2.29116511  
C -4.16436481 -0.39945155 -2.51858592  
H -4.86742449 -0.81317192 -3.24686790  
C -3.03451371 -1.19142950 -2.13218522  
C -2.77480030 -2.48654723 -2.62831783  
C -1.66146302 -3.18242049 -2.18867135  
H -1.47616637 -4.19536781 -2.54728699  
C -0.81411022 -2.58324027 -1.23509240  
C -2.11322832 -0.67252910 -1.18062377  
C -2.32422137 0.64625371 -0.62835336  
C -0.48253894 2.63810515 1.77254200  
C 0.34252694 -3.25559855 -0.53276688  
C -0.35441166 5.10574055 1.18384719  
H -1.21759021 5.67793846 1.57255447  
C 0.93968254 5.91413212 1.34807158  
H 1.70540547 5.52510071 0.65698969  
H 0.78690183 6.98346043 1.14005637  
C 1.33738959 5.62038469 2.80270100  
H 0.72428566 6.22227192 3.49425697  
H 2.39624643 5.83168507 3.01030684  
C 1.01766503 4.12955284 2.95917749  
H 1.85894859 3.47796297 2.66636515  
H 0.71729445 3.84052992 3.97806859  
C 2.35818887 -4.60323572 -0.47882521  
H 2.05267978 -5.34680319 0.27341518  
H 2.83628178 -3.76507211 0.05689404  
C 3.23689556 -5.17572069 -1.59809661  
C 2.85441041 -4.32342100 -2.81845880



C 1.33514035 -4.17723370 -2.66210651  
H 3.12996197 -4.78175735 -3.77972245  
H 3.32097793 -3.32704949 -2.74910045  
H 2.99296618 -6.23579502 -1.78098154  
H 4.30505371 -5.10807562 -1.34555352  
H 0.93904483 -3.27889824 -3.15642571  
Nd 0.59163088 -0.51438659 1.26162875  
N -1.22815120 -1.37509978 3.36670852  
O 0.04768837 -1.26018405 3.54520321  
O -1.64762032 -1.06987047 2.17181563  
O -1.98594320 -1.73954666 4.24467659  
N 3.26579833 -0.70425910 2.40704799  
O 2.61615038 0.41821823 2.30857372  
O 2.62426591 -1.74253583 1.97387254  
O 4.38883162 -0.76971948 2.86816740  
N 1.93616426 0.45895538 -1.19546294  
O 2.47861719 0.83873916 -2.21935463  
O 1.92613173 -0.79302788 -0.84377909  
O 1.32887053 1.26369250 -0.38947767  
H 0.81279373 -5.06918955 -3.05592966  
H -0.55238175 4.82093000 0.14054143

**L1\*Eu(NO<sub>3</sub>)<sub>3</sub>**

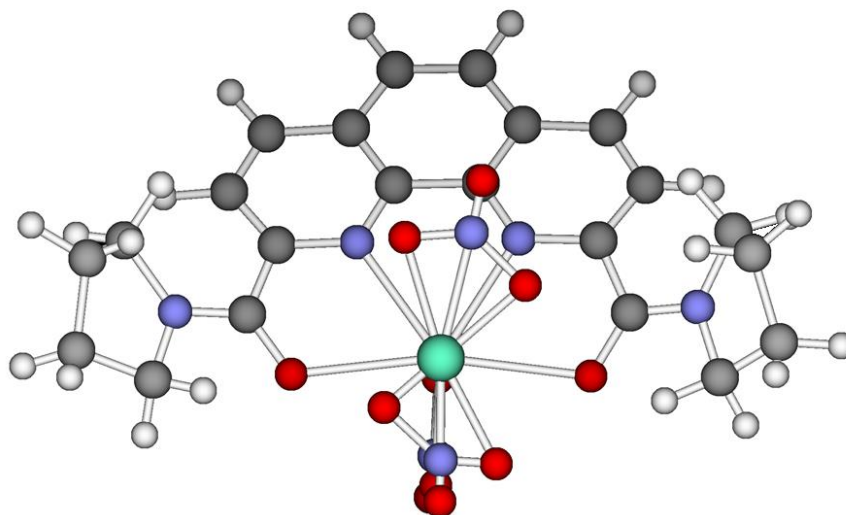

PBE/L1 theoretical level

E= -12909.277954

G= 232.5764 kcal/mol, H= 304.7929 kcal/mol, U= 304.2004 kcal/mol, S= 242.2152 cal/mol at T= 298.150 K

|   |             |             |             |
|---|-------------|-------------|-------------|
| H | -4.46550131 | 3.31566811  | -0.71893531 |
| H | -3.47777200 | -2.93646646 | -3.32435012 |
| N | -1.43908632 | 1.10169768  | 0.28113699  |
| N | -0.09651148 | 3.87951303  | 2.05691862  |
| N | -1.04306889 | -1.34770739 | -0.74998987 |
| N | 1.14012742  | -4.09135866 | -1.15178239 |
| O | 0.00474465  | 1.65450573  | 2.42379069  |
| O | 0.45450643  | -3.00597119 | 0.72052002  |
| C | -1.57537961 | 2.32275724  | 0.79217076  |
| C | -2.66493487 | 3.15514207  | 0.45539644  |
| H | -2.78638363 | 4.13066244  | 0.92747664  |
| C | -3.60137677 | 2.69935250  | -0.45642841 |
| C | -3.44572496 | 1.42707205  | -1.04806089 |
| C | -4.35266447 | 0.87243551  | -2.00892830 |
| H | -5.21439075 | 1.46940374  | -2.32000923 |
| C | -4.15618086 | -0.37824497 | -2.52655125 |
| H | -4.86018515 | -0.79058945 | -3.25470877 |
| C | -3.03545403 | -1.17832196 | -2.12908316 |
| C | -2.78728628 | -2.48377657 | -2.60739779 |
| C | -1.68441975 | -3.18630314 | -2.15259719 |
| H | -1.49161768 | -4.20509481 | -2.49367356 |
| C | -0.82680196 | -2.57773733 | -1.21232629 |
| C | -2.11075902 | -0.65626663 | -1.18405664 |
| C | -2.32205319 | 0.66253537  | -0.63045710 |
| C | -0.50147909 | 2.61691833  | 1.81507170  |
| C | 0.31842276  | -3.25502968 | -0.49092472 |
| C | -0.32318369 | 5.08302116  | 1.23179710  |
| H | -1.17905378 | 5.66545773  | 1.62102389  |

C 0.98265141 5.87068892 1.40443599  
H 1.74423826 5.47596550 0.71204609  
H 0.84606218 6.94355392 1.20380008  
C 1.37364972 5.56131411 2.85769820  
H 0.76911783 6.16803026 3.55247116  
H 2.43543386 5.75470686 3.06763482  
C 1.03089523 4.07467985 3.00404787  
H 1.86190414 3.41274118 2.70464277  
H 0.72535068 3.78362036 4.02072620  
C 2.33286715 -4.60076857 -0.42656657  
H 2.03907943 -5.38820791 0.28486159  
H 2.76637888 -3.76819158 0.15326577  
C 3.26154923 -5.09045839 -1.54572880  
C 2.87176800 -4.20515823 -2.73983335  
C 1.34482014 -4.13359213 -2.61431026  
H 3.19026375 -4.61072016 -3.71152997  
H 3.28748059 -3.19185615 -2.61602426  
H 3.06846285 -6.15170765 -1.77656448  
H 4.31932974 -4.98734331 -1.26308525  
H 0.91987622 -3.23890662 -3.09081101  
Eu 0.53357255 -0.48613361 1.22236919  
N -1.28251946 -1.44405508 3.28205419  
O -0.00619730 -1.34024012 3.45067334  
O -1.71440721 -1.11681283 2.10575938  
O -2.02984881 -1.82220221 4.16698837  
N 3.27523971 -0.45313212 2.19890356  
O 2.65627742 0.61963916 1.81135619  
O 2.58467698 -1.53761828 2.13545275  
O 4.42875528 -0.42766666 2.59214926  
N 1.91109276 0.15764186 -1.31937385  
O 2.48145866 0.44676176 -2.36070538

O 2.01010513 -1.01043797 -0.77776301  
O 1.15511322 1.00084960 -0.69458401  
H 0.87114209 -5.03514814 -3.04580545  
H -0.52217209 4.80689049 0.18630683

**L1\*Lu(NO<sub>3</sub>)<sub>3</sub>**

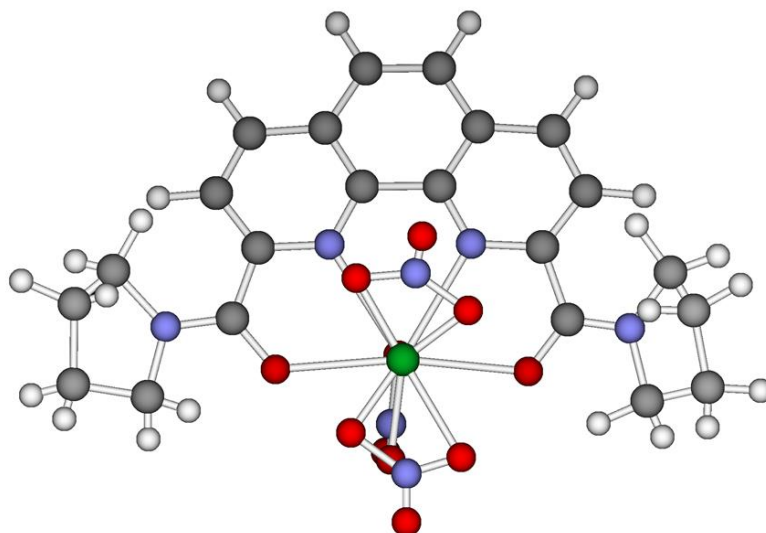

PBE/L1 theoretical level

E= -16631.682739

G= 234.8352 kcal/mol, H= 305.5231 kcal/mol, U= 304.9307 kcal/mol, S= 237.0886 cal/mol at T= 298.150 K

H -4.46818399 3.32488418 -0.76679200  
H -3.42177510 -2.92817831 -3.39439750  
N -1.40889060 1.13183939 0.17493676  
N -0.11702256 3.86151862 2.07804322  
N -1.00112820 -1.29095471 -0.83221257  
N 1.13799679 -4.10696745 -1.09413922  
O 0.12378850 1.62765980 2.20838356  
O 0.51210564 -2.82285810 0.66071099  
C -1.55220699 2.34188509 0.70574301  
C -2.65815639 3.16378379 0.39345291  
H -2.79318976 4.12876177 0.88238508  
C -3.59642959 2.71270299 -0.52052903  
C -3.43218350 1.45019448 -1.13091683  
C -4.33388996 0.88665509 -2.09229875

H -5.20400620 1.47254920 -2.40124774  
C -4.12383842 -0.36170545 -2.61246872  
H -4.82534122 -0.78006762 -3.33959484  
C -2.99561810 -1.15336108 -2.21674466  
C -2.73662400 -2.46060681 -2.68194461  
C -1.63026989 -3.15028620 -2.21385002  
H -1.43583417 -4.17328024 -2.53979993  
C -0.77836657 -2.52606320 -1.27898097  
C -2.07445526 -0.61818606 -1.27653873  
C -2.29811716 0.69730443 -0.72609574  
C -0.45946312 2.61092782 1.71342051  
C 0.35337260 -3.17891598 -0.52284694  
C -0.43980837 5.13370371 1.40397334  
H -1.32631075 5.60619879 1.86700821  
C 0.81275326 5.98552942 1.65403903  
H 1.58299720 5.73488283 0.90646428  
H 0.59702420 7.06224775 1.58992815  
C 1.25975418 5.52988291 3.05159092  
H 0.63377547 6.00476503 3.82542562  
H 2.31105018 5.76987886 3.26583719  
C 1.02022874 4.01666498 3.02068639  
H 1.88379014 3.45113277 2.62993598  
H 0.76068205 3.58355379 3.99870682  
C 2.30061221 -4.60632324 -0.31321049  
H 1.95612323 -5.26600885 0.49801645  
H 2.80470705 -3.74127126 0.15171392  
C 3.16573834 -5.31522179 -1.36308527  
C 2.82780671 -4.56917381 -2.66361189  
C 1.31456220 -4.34727097 -2.53974986  
H 3.09092951 -5.12860775 -3.57349348  
H 3.33538055 -3.59103417 -2.68506265  
H 2.88281345 -6.37786818 -1.44845974  
H 4.23343325 -5.26393080 -1.10539830  
H 0.96082389 -3.48411679 -3.12138271  
Lu 0.61865473 -0.42394879 1.05481398

N -0.93413794 -1.23308909 3.21904159  
 O 0.34618238 -1.07856965 3.28894711  
 O -1.44318175 -0.98533642 2.04274702  
 O -1.61660850 -1.57863235 4.16271210  
 N 3.27214193 -0.51751155 1.98444581  
 O 2.58864760 0.58083290 1.81948209  
 O 2.62188220 -1.59115672 1.68889284  
 O 4.42225504 -0.51778507 2.38027263  
 N 1.83278871 0.41160598 -1.37471247  
 O 2.35476947 0.75126529 -2.42123485  
 O 1.88103545 -0.81130838 -0.93549335  
 O 1.18082571 1.22816718 -0.61614418  
 H 0.75980514 -5.25115442 -2.85396099  
 H -0.63619989 4.96977234 0.33464190

**L1\*Am(NO<sub>3</sub>)<sub>3</sub>**

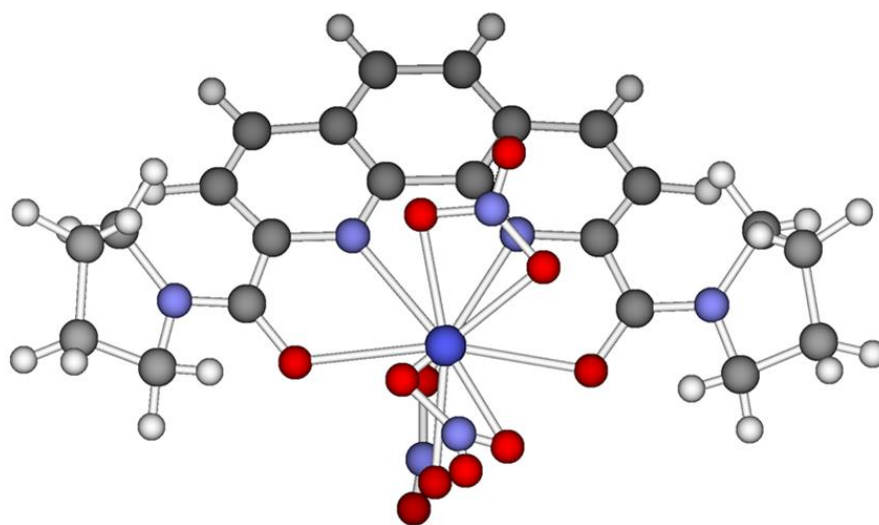

PBE/L1 theoretical level

E= -32481.788647

G= 232.9302 kcal/mol, H= 304.5881 kcal/mol, U= 303.9956 kcal/mol, S= 240.3419 cal/mol at T= 298.150 K

H -4.44610596 3.32322645 -0.72309446  
 H -3.40981102 -2.90548658 -3.36085081  
 N -1.37977099 1.14430630 0.24257338

N -0.14140336 3.92860246 2.12169194  
N -0.96395510 -1.29950476 -0.80222005  
N 1.14971483 -4.13849592 -1.14916861  
O 0.12296699 1.69694734 2.31690454  
O 0.60346550 -2.86508393 0.64157468  
C -1.53754401 2.36144400 0.77549374  
C -2.64605784 3.17416096 0.45018980  
H -2.79032159 4.13697290 0.94039327  
C -3.57141018 2.71839762 -0.46986246  
C -3.39559579 1.45562863 -1.08135223  
C -4.29363823 0.90222633 -2.04456782  
H -5.16216516 1.49205792 -2.35011601  
C -4.08693266 -0.34714606 -2.57060075  
H -4.79011822 -0.76272684 -3.29759145  
C -2.96450949 -1.13904762 -2.17636251  
C -2.71675086 -2.44899821 -2.64920592  
C -1.61725354 -3.15123558 -2.18838358  
H -1.43687892 -4.17572069 -2.51757717  
C -0.75144637 -2.54098701 -1.25805354  
C -2.03860974 -0.61303419 -1.23197734  
C -2.26013231 0.70051706 -0.67096853  
C -0.47117805 2.66393185 1.78540635  
C 0.39091083 -3.20569587 -0.54305398  
C -0.44852942 5.17535686 1.39370859  
H -1.34948719 5.66046572 1.81361461  
C 0.79233092 6.04191256 1.64928353  
H 1.58569849 5.76985455 0.93392634  
H 0.57434249 7.11465359 1.54140329  
C 1.19946945 5.63691425 3.07409525  
H 0.54529238 6.13029718 3.81226087  
H 2.24165559 5.89283609 3.31329179

C 0.97266394 4.12158060 3.08347392  
H 1.85230935 3.55775976 2.72726393  
H 0.69626051 3.71615553 4.06893682  
C 2.32167101 -4.66854906 -0.40778261  
H 1.98865497 -5.30425882 0.42705137  
H 2.87899137 -3.81808043 0.02110865  
C 3.12121677 -5.41683388 -1.48097003  
C 2.78143334 -4.64964867 -2.76828480  
C 1.28294337 -4.36510277 -2.60193181  
H 2.99601269 -5.21429205 -3.68763494  
H 3.33093333 -3.69459939 -2.79883218  
H 2.78183031 -6.46342659 -1.55926275  
H 4.19711494 -5.42045593 -1.25386322  
H 0.94980806 -3.48048091 -3.16361117  
Am 0.60585040 -0.39851704 1.10938442  
N -1.12435460 -1.40793300 3.22696352  
O 0.16473480 -1.31127656 3.33064103  
O -1.60602355 -1.02678120 2.08344245  
O -1.82609224 -1.82282650 4.12781334  
N 3.36850762 -0.28606406 2.01527429  
O 2.72840023 0.76551145 1.59971035  
O 2.66850090 -1.37507355 2.01573420  
O 4.52949047 -0.24815817 2.37182140  
N 1.95858049 0.24688917 -1.43975043  
O 2.51538944 0.55200541 -2.47904563  
O 2.11278319 -0.90326196 -0.87220722  
O 1.14871573 1.05661190 -0.82610369  
H 0.68336755 -5.23992348 -2.91627169  
H -0.61593562 4.97148275 0.32612649



**L1\*Cm(NO<sub>3</sub>)<sub>3</sub>**

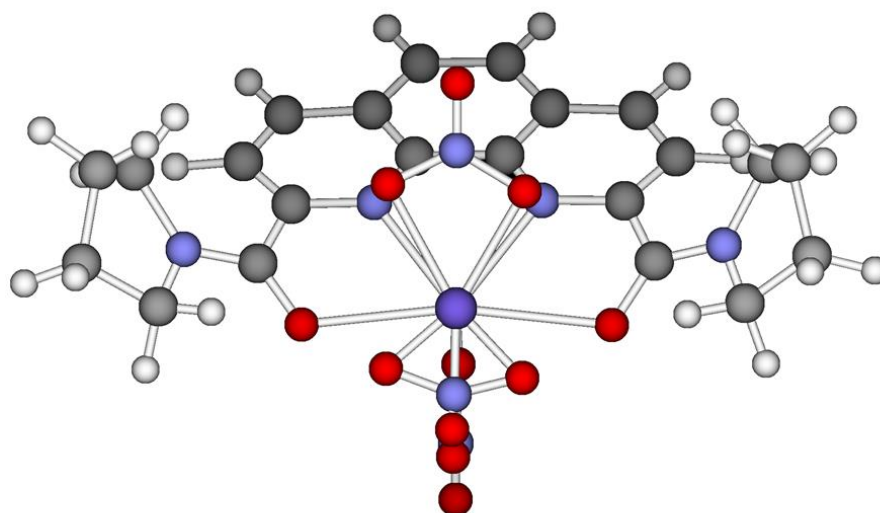

PBE/L1 theoretical level

E= -33318.106718

G= 233.3266 kcal/mol, H= 304.4248 kcal/mol, U= 303.8323 kcal/mol, S= 238.4645 cal/mol at T= 298.150 K

|   |             |             |             |
|---|-------------|-------------|-------------|
| H | -4.50152969 | 3.30145550  | -0.76869041 |
| H | -3.45823789 | -2.95980263 | -3.34764433 |
| N | -1.45464444 | 1.11159778  | 0.23404010  |
| N | -0.12447076 | 3.87733126  | 2.01321769  |
| N | -1.05024970 | -1.33677483 | -0.76707661 |
| N | 1.18418097  | -4.04390478 | -1.19862199 |
| O | -0.10957855 | 1.66224098  | 2.45064282  |
| O | 0.54706460  | -2.91522956 | 0.65503889  |
| C | -1.60802853 | 2.32916689  | 0.74944991  |
| C | -2.70243573 | 3.15335488  | 0.41053081  |
| H | -2.82740355 | 4.12998533  | 0.88056445  |
| C | -3.63522434 | 2.69006419  | -0.50187445 |
| C | -3.47307706 | 1.41476643  | -1.08544707 |
| C | -4.37597561 | 0.84635311  | -2.04225063 |
| H | -5.24404383 | 1.43319321  | -2.35514784 |
| C | -4.16765881 | -0.40441042 | -2.55608582 |

H -4.86793137 -0.82518274 -3.28300762  
C -3.03950381 -1.19271648 -2.15609980  
C -2.77372456 -2.49492431 -2.63288736  
C -1.65647674 -3.17797327 -2.18289661  
H -1.44919205 -4.19213486 -2.52860737  
C -0.80798239 -2.55678010 -1.24246740  
C -2.12296295 -0.66035056 -1.20863855  
C -2.34251118 0.66166633 -0.66622853  
C -0.55991304 2.62337017 1.79586148  
C 0.36697358 -3.20016408 -0.54582769  
C -0.28330564 5.05215597 1.13352644  
H -1.11874783 5.68798304 1.48126662  
C 1.05504632 5.78500509 1.29720628  
H 1.80883741 5.31897402 0.64178884  
H 0.97486693 6.85211182 1.04255962  
C 1.40140426 5.52898121 2.77236199  
H 0.81430280 6.19819164 3.42338920  
H 2.46715212 5.68096066 2.99594951  
C 0.98418850 4.06883287 2.98341393  
H 1.78930688 3.35295463 2.74330521  
H 0.63731593 3.84523082 4.00383282  
C 2.39092588 -4.53552437 -0.48382238  
H 2.10083413 -5.24752760 0.30402839  
H 2.88035893 -3.67689610 0.00763600  
C 3.24540973 -5.15395784 -1.59730804  
C 2.83958077 -4.34954071 -2.84261966  
C 1.32420385 -4.19361925 -2.66090274  
H 3.09428596 -4.84764194 -3.78976011  
H 3.31147456 -3.35364628 -2.82342315  
H 2.99557257 -6.21965933 -1.73306680  
H 4.31855297 -5.07939100 -1.36957002

H 0.91840780 -3.31410098 -3.18071175  
 Cm 0.55561316 -0.47382635 1.29950523  
 N -1.22789490 -1.49580479 3.34853244  
 O 0.04490770 -1.36646724 3.53608465  
 O -1.65115941 -1.13552368 2.16671062  
 O -1.98216677 -1.91960049 4.20189381  
 N 3.19126964 -0.59109998 2.54270053  
 O 2.44421172 0.47224477 2.57153797  
 O 2.67226577 -1.60094619 1.91548204  
 O 4.29072142 -0.63292015 3.06072164  
 N 1.93142283 0.62412322 -1.08342624  
 O 2.45465016 1.07269692 -2.08955431  
 O 1.84145749 -0.65060514 -0.85867774  
 O 1.42160225 1.38463712 -0.16765098  
 H 0.79425097 -5.09921503 -3.01058316  
 H -0.47658923 4.73823214 0.09779645

**L2\*La(NO<sub>3</sub>)<sub>3</sub>**

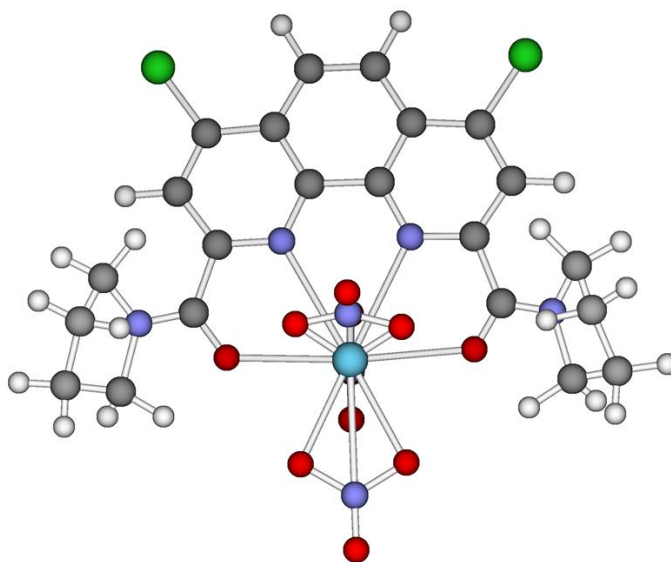

PBE/L1 theoretical level

E= -11478.690625

G= 216.3096 kcal/mol, H= 294.6496 kcal/mol, U= 294.0571 kcal/mol, S= 262.7537 cal/mol at T= 298.150 K

H -4.52806473 3.27118492 -0.70783961  
H -3.50268483 -2.97827387 -3.28968263  
N -1.47856951 1.08658290 0.30045471  
N -0.09366491 3.89596319 1.94958937  
N -1.07944095 -1.37790608 -0.70982087  
N 1.19820797 -4.01222277 -1.26134396  
O -0.12904730 1.71322906 2.53076386  
O 0.53269392 -3.03243709 0.66759455  
C -1.62093258 2.31493306 0.79196364  
C -2.71388578 3.13975191 0.45021725  
H -2.82580471 4.12592649 0.90344417  
C -3.65971041 2.66287255 -0.44035134  
C -3.50651670 1.37853110 -1.00618947  
C -4.42143106 0.80737954 -1.94949973  
H -5.29259348 1.39412987 -2.25376987  
C -4.21711206 -0.44282344 -2.46414804  
H -4.92285490 -0.86542672 -3.18464994  
C -3.08114195 -1.22636688 -2.07821369  
C -2.81223440 -2.51993394 -2.57629704  
C -1.68336511 -3.19966817 -2.15315914  
H -1.46688008 -4.20463085 -2.51974487  
C -0.83188897 -2.58589005 -1.21068501  
C -2.15833735 -0.69797117 -1.13352609  
C -2.37382770 0.62610191 -0.58916259  
C -0.56019324 2.64100885 1.81921852  
C 0.36009955 -3.24029756 -0.54925495  
C -0.22750410 5.01040459 0.99001980  
H -1.03639483 5.69682217 1.30262291  
C 1.13614762 5.70734262 1.08515859  
H 1.86601686 5.16614485 0.46088079  
H 1.08957326 6.75415945 0.75052357

C 1.48930871 5.55162144 2.57258773  
H 0.93055618 6.28643847 3.17624736  
H 2.56166410 5.68503189 2.77602172  
C 1.02790463 4.12573433 2.89630842  
H 1.80914855 3.36962700 2.70648909  
H 0.68314916 3.99076056 3.93308640  
C 2.42460465 -4.51393747 -0.58797944  
H 2.16551018 -5.30457926 0.13315034  
H 2.87730002 -3.68224955 -0.02132681  
C 3.30622387 -4.99460316 -1.74775875  
C 2.85963655 -4.11032343 -2.92267060  
C 1.33916855 -4.04470015 -2.73119307  
H 3.13644481 -4.51389790 -3.90781784  
H 3.27982426 -3.09639168 -2.81910706  
H 3.10917091 -6.05643559 -1.97225523  
H 4.37489796 -4.88683462 -1.51177883  
H 0.88793933 -3.15030503 -3.18356919  
La 0.55687028 -0.54815400 1.45456898  
N -1.43108499 -1.54435408 3.44929218  
O -0.17494348 -1.44090831 3.73142600  
O -1.76759434 -1.19087648 2.23628426  
O -2.25597286 -1.94175220 4.25006580  
N 3.20336342 -0.73231447 2.81889963  
O 2.48524618 0.35161147 2.83371592  
O 2.68211341 -1.73351550 2.17585111  
O 4.28763008 -0.80197847 3.36563444  
N 1.96410143 0.57403320 -0.99773806  
O 2.46891284 1.02194226 -2.01469922  
O 1.88594496 -0.70144236 -0.77274525  
O 1.46768785 1.34006739 -0.07905519  
H 0.85301238 -4.94699287 -3.14674330

H -0.44639614 4.63105822 -0.01830472  
PBE0/L1 theoretical level  
E= -11478.622988  
Cl -4.96386528 3.65538692 -0.86824650  
Cl -3.79013586 -3.26458740 -3.70398712  
N -1.49596488 1.06776083 0.31849381  
N -0.07792855 3.81932139 1.93347430  
N -1.08463609 -1.35743392 -0.67522907  
N 1.23179662 -3.91055465 -1.23108184  
O -0.23838735 1.68164647 2.58485889  
O 0.54931742 -2.96440792 0.68148839  
C -1.63341033 2.28152013 0.80432516  
C -2.69648242 3.11800528 0.45508754  
H -2.80679560 4.10044241 0.89491570  
C -3.62557983 2.65008330 -0.44165596  
C -3.49037457 1.36831546 -1.00768733  
C -4.38489771 0.80067986 -1.95936179  
H -5.24186325 1.38245547 -2.27556348  
C -4.17492867 -0.43703991 -2.46659875  
H -4.86253405 -0.85387212 -3.19204354  
C -3.05194044 -1.21627355 -2.06683922  
C -2.75157261 -2.50271463 -2.55309963  
C -1.63050854 -3.16772604 -2.12030292  
H -1.40631270 -4.15983772 -2.48943901  
C -0.81510860 -2.54407048 -1.17267025  
C -2.15416384 -0.69679534 -1.11414552  
C -2.37782574 0.62164068 -0.57386339  
C -0.59254450 2.59943843 1.84427333  
C 0.38618293 -3.17486954 -0.52073985  
C -0.13304920 4.87596226 0.91980165  
H -0.89773673 5.61869907 1.17961907

C 1.25951755 5.48981953 0.99999863  
H 1.95807576 4.87111664 0.42803302  
H 1.28266323 6.50831223 0.60680586  
C 1.57557881 5.40162802 2.49048233  
H 1.05250645 6.19453192 3.03543305  
H 2.64241910 5.48430634 2.70696831  
C 1.03033412 4.03374052 2.88116503  
H 1.76543009 3.23333025 2.74608564  
H 0.66448075 3.97929430 3.90908146  
C 2.45653796 -4.39030266 -0.56612933  
H 2.21026635 -5.15866232 0.17038196  
H 2.91565704 -3.55165386 -0.03210652  
C 3.31664276 -4.89180183 -1.71923041  
C 2.86989808 -4.02192593 -2.89094853  
C 1.36114764 -3.94466686 -2.69022441  
H 3.13372612 -4.43327284 -3.86750293  
H 3.29595184 -3.01783156 -2.80042839  
H 3.10413861 -5.94564390 -1.92784369  
H 4.38103485 -4.79519081 -1.49654758  
H 0.92026597 -3.05373645 -3.14050341  
La 0.50878137 -0.53753483 1.52559733  
N -1.50732303 -1.64481461 3.39347744  
O -0.28094628 -1.56325018 3.70281482  
O -1.81224144 -1.21832788 2.22602892  
O -2.33377242 -2.08976316 4.13698006  
N 3.13163352 -0.65423256 2.89490104  
O 2.35942650 0.35424703 2.98775864  
O 2.69207525 -1.61395121 2.18240547  
O 4.19931698 -0.69509858 3.43576193  
N 1.90227091 0.67915243 -0.86613357  
O 2.39756608 1.16520071 -1.84723735

O 1.78833747 -0.57768834 -0.72132969  
O 1.45395708 1.39140320 0.08535604  
H 0.87124187 -4.83722734 -3.09913111  
H -0.35534516 4.45932007 -0.06400257

**L2\*Nd(NO<sub>3</sub>)<sub>3</sub>**

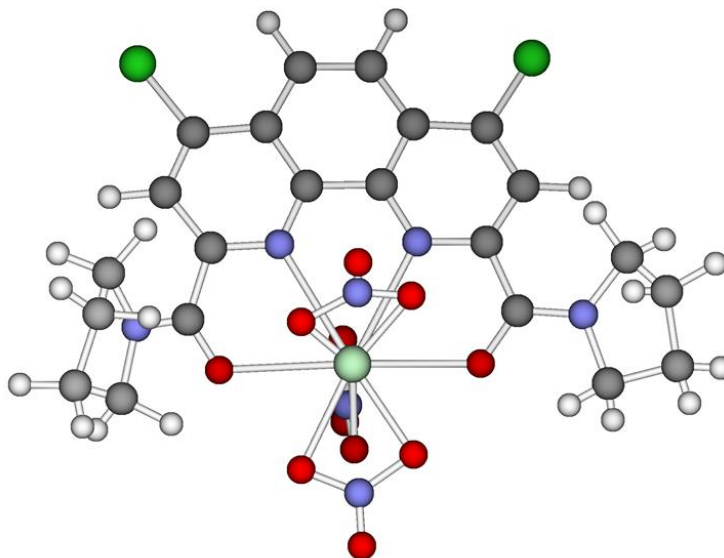

PBE/L1 theoretical level

E= -12610.085242

G= 217.2371 kcal/mol, H= 294.5433 kcal/mol, U= 293.9508 kcal/mol, S= 259.2863 cal/mol at T= 298.150 K

Cl -4.99604464 3.69126296 -0.93883449  
Cl -3.77347350 -3.31733513 -3.70130157  
N -1.47018707 1.12109780 0.27965912  
N -0.14713034 3.86973071 2.04644084  
N -1.02503312 -1.31188345 -0.71092403  
N 1.25980496 -3.99714184 -1.22559321  
O -0.33631992 1.68931139 2.63623738  
O 0.76770771 -2.76354289 0.59906882  
C -1.64474404 2.33942556 0.78911680  
C -2.72180557 3.16689467 0.42555252  
H -2.85491705 4.15043879 0.87678951  
C -3.63993430 2.68956804 -0.49559432



C -3.48583198 1.40104222 -1.06619716  
C -4.37520552 0.81575382 -2.01882052  
H -5.24215031 1.39352405 -2.34338260  
C -4.15393734 -0.43830088 -2.51825166  
H -4.84293127 -0.87193960 -3.24491763  
C -3.02303219 -1.20888829 -2.10890841  
C -2.71699834 -2.51338720 -2.57043314  
C -1.57787919 -3.16674423 -2.13096547  
H -1.36125672 -4.17510748 -2.48189783  
C -0.74261802 -2.51648474 -1.20277870  
C -2.11311913 -0.66435438 -1.15840244  
C -2.35089231 0.66155553 -0.62614238  
C -0.65516597 2.63718534 1.89260435  
C 0.48851541 -3.11431551 -0.56317669  
C -0.14817993 4.95982122 1.04977298  
H -0.92290491 5.70948601 1.29670668  
C 1.25638187 5.55721617 1.20354581  
H 1.97472894 4.93490076 0.64507991  
H 1.30995870 6.59034443 0.82985455  
C 1.50846446 5.43574667 2.71481085  
H 0.97581893 6.23541689 3.25650263  
H 2.57471991 5.49480534 2.97742391  
C 0.92071366 4.06219101 3.06247902  
H 1.65210927 3.24231791 2.95793486  
H 0.49515793 4.00157022 4.07604790  
C 2.49828386 -4.47146034 -0.55637091  
H 2.24291372 -5.07948828 0.32502896  
H 3.06471300 -3.59398198 -0.19932374  
C 3.23108125 -5.24456978 -1.65816891  
C 2.77812958 -4.53675413 -2.94439816  
C 1.29053819 -4.27144241 -2.67648339

H 2.93237686 -5.13512421 -3.85436392  
H 3.30713630 -3.57630539 -3.05820775  
H 2.90908599 -6.29930115 -1.67009866  
H 4.32086325 -5.21991444 -1.51418197  
H 0.89883846 -3.41456437 -3.24324417  
Nd 0.53074694 -0.37173703 1.37562680  
N -1.26735687 -1.72081232 3.22478390  
O -0.00224403 -1.57383370 3.45247173  
O -1.68334699 -1.22556913 2.09372997  
O -2.01657915 -2.27811909 4.00191545  
N 3.13441706 -0.29800323 2.68013024  
O 2.18000317 0.52109337 2.99105811  
O 2.82872438 -1.16474080 1.75980604  
O 4.23054314 -0.26000693 3.20308828  
N 1.86457014 1.02364695 -0.87538946  
O 2.40255451 1.61732507 -1.79386580  
O 1.59168172 -0.23656048 -0.92398500  
O 1.51671278 1.62483251 0.22481938  
H 0.68964761 -5.16872597 -2.91555190  
H -0.33642393 4.56293488 0.04206917

**L2\*Eu(NO<sub>3</sub>)<sub>3</sub>**

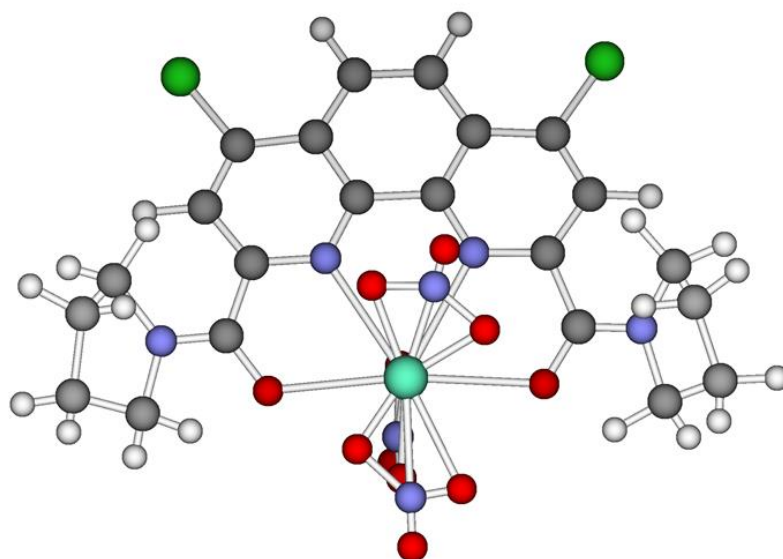

PBE/L1 theoretical level

E= -13831.082768

G= 217.9382 kcal/mol, H= 294.4433 kcal/mol, U= 293.8508 kcal/mol, S= 256.5994 cal/mol at T= 298.150 K

|    |             |             |             |
|----|-------------|-------------|-------------|
| Cl | -4.93080473 | 3.72583795  | -0.86443150 |
| Cl | -3.81243610 | -3.23828149 | -3.77598262 |
| N  | -1.43359625 | 1.09178293  | 0.27913573  |
| N  | -0.08063873 | 3.86602616  | 2.05261898  |
| N  | -1.03434992 | -1.33986056 | -0.74665576 |
| N  | 1.15956533  | -4.07837343 | -1.14180255 |
| O  | -0.01144298 | 1.64244437  | 2.44175935  |
| O  | 0.44867781  | -3.01051903 | 0.73237377  |
| C  | -1.56468642 | 2.31306815  | 0.78938538  |
| C  | -2.64149141 | 3.15636063  | 0.45422700  |
| H  | -2.76673341 | 4.13297129  | 0.92038441  |
| C  | -3.57615757 | 2.70440173  | -0.46202239 |
| C  | -3.43925381 | 1.42868900  | -1.06473756 |
| C  | -4.33631134 | 0.87669647  | -2.02999902 |
| H  | -5.19247341 | 1.47483909  | -2.34608769 |
| C  | -4.13757467 | -0.37360942 | -2.54759359 |
| H  | -4.83407450 | -0.78370124 | -3.28076839 |
| C  | -3.02442670 | -1.17420495 | -2.14528251 |
| C  | -2.75166249 | -2.48386550 | -2.61633062 |
| C  | -1.65038741 | -3.18476701 | -2.15396118 |
| H  | -1.45869589 | -4.20099354 | -2.49958825 |
| C  | -0.80995512 | -2.56807423 | -1.20893610 |
| C  | -2.10304451 | -0.65771484 | -1.19115627 |
| C  | -2.31769395 | 0.66387928  | -0.63587517 |
| C  | -0.49721870 | 2.60689688  | 1.82070184  |
| C  | 0.33038294  | -3.25032735 | -0.48230755 |
| C  | -0.29381347 | 5.06747866  | 1.22013390  |
| H  | -1.15156138 | 5.65431643  | 1.59834254  |

C 1.01308715 5.85045481 1.40485132  
H 1.78072548 5.45101452 0.72203726  
H 0.88214302 6.92301941 1.19927502  
C 1.38711154 5.54479074 2.86335397  
H 0.77757746 6.15609741 3.54960823  
H 2.44729567 5.73497200 3.08388233  
C 1.03733468 4.06009674 3.01167035  
H 1.86879706 3.39370990 2.72333956  
H 0.71900994 3.77356720 4.02570438  
C 2.34468937 -4.59447432 -0.40783656  
H 2.04185104 -5.38579655 0.29540366  
H 2.77338743 -3.76608396 0.18157056  
C 3.28310275 -5.07854748 -1.52104735  
C 2.90653110 -4.18557215 -2.71363521  
C 1.37865567 -4.11085320 -2.60306168  
H 3.23286557 -4.58673191 -3.68448353  
H 3.32359719 -3.17398190 -2.58079720  
H 3.09079313 -6.13811493 -1.75985622  
H 4.33824205 -4.97864532 -1.22764444  
H 0.96089387 -3.21182609 -3.07776499  
Eu 0.53196633 -0.49620482 1.24868178  
N -1.31116557 -1.45120049 3.28352714  
O -0.03613247 -1.35615885 3.46602058  
O -1.72749102 -1.12036598 2.10228825  
O -2.07051969 -1.82551515 4.15926218  
N 3.25877833 -0.48032799 2.26033187  
O 2.64487123 0.59929109 1.88378596  
O 2.56753707 -1.56286955 2.16987038  
O 4.40730190 -0.46357048 2.66687942  
N 1.93034196 0.16886137 -1.27388644  
O 2.50537300 0.46378407 -2.31040335

O 2.01754713 -1.00628543 -0.74439043  
 O 1.18100131 1.01188147 -0.64080709  
 H 0.90682316 -5.00833988 -3.04471803  
 H -0.48206571 4.78852892 0.17344499

**L2\*Lu(NO<sub>3</sub>)<sub>3</sub>**

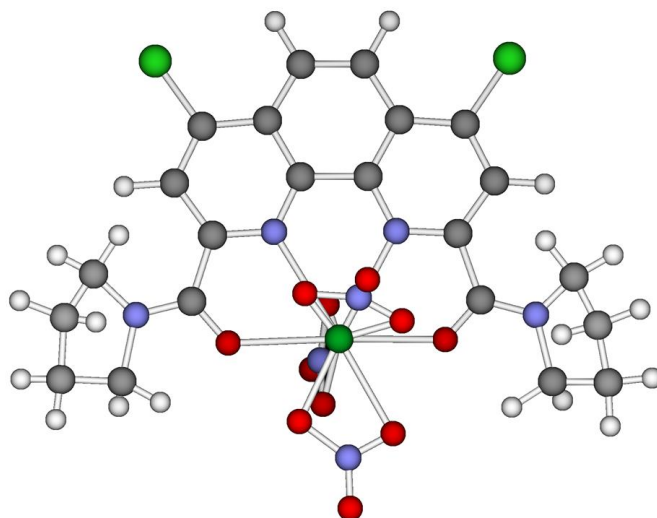

PBE/L1 theoretical level

E= -17553.487293

G= 220.1956 kcal/mol, H= 295.1782 kcal/mol, U= 294.5857 kcal/mol, S= 251.4928 cal/mol at T= 298.150 K

Cl -4.95321989 3.72104454 -0.87271386  
 Cl -3.77729845 -3.24286866 -3.81366348  
 N -1.40895307 1.11782789 0.18855096  
 N -0.09820830 3.85047722 2.07489967  
 N -1.00051820 -1.28758657 -0.81671029  
 N 1.15819263 -4.08816910 -1.09052122  
 O 0.11793174 1.61408234 2.23058105  
 O 0.51092571 -2.82797718 0.67550707  
 C -1.54470778 2.32891417 0.71773076  
 C -2.64056015 3.16046333 0.41241270  
 H -2.77698970 4.12794685 0.89358848  
 C -3.58214736 2.71020985 -0.49946380  
 C -3.43982720 1.44373214 -1.11937523  
 C -4.33739328 0.88176143 -2.07913017

H -5.20448208 1.46822298 -2.38763022  
C -4.12636280 -0.36583531 -2.60076857  
H -4.82409000 -0.78298730 -3.32883430  
C -3.00171924 -1.15605044 -2.20715213  
C -2.71865106 -2.46627998 -2.66750979  
C -1.60962081 -3.15318179 -2.19971347  
H -1.41809106 -4.17361164 -2.53166080  
C -0.76953566 -2.51985979 -1.26579070  
C -2.07853532 -0.62557560 -1.26358581  
C -2.30420923 0.69223392 -0.70963138  
C -0.45139703 2.60003614 1.72586501  
C 0.36482552 -3.17418504 -0.51225758  
C -0.40619418 5.11784410 1.38316822  
H -1.28781676 5.60556507 1.83945107  
C 0.85568821 5.95786476 1.62563610  
H 1.62564600 5.68543530 0.88540924  
H 0.65356737 7.03588438 1.54340112  
C 1.29090166 5.51778316 3.03171730  
H 0.66421968 6.00789309 3.79539847  
H 2.34292245 5.75144768 3.24915385  
C 1.03834641 4.00659657 3.01932263  
H 1.89741158 3.42883301 2.63651347  
H 0.77193266 3.58706427 4.00131750  
C 2.31957769 -4.59168673 -0.30971193  
H 1.97331083 -5.25977516 0.49374986  
H 2.81907582 -3.72930551 0.16500399  
C 3.19047141 -5.28809834 -1.36320782  
C 2.85302901 -4.53349066 -2.65896344  
C 1.33870697 -4.31755877 -2.53776908  
H 3.11964679 -5.08571625 -3.57212448  
H 3.35755682 -3.55367684 -2.67276311  
H 2.91291380 -6.35130024 -1.45747578  
H 4.25715446 -5.23361778 -1.10216439  
H 0.98373139 -3.45153284 -3.11428547  
Lu 0.62473065 -0.43405655 1.08431816

|   |             |             |             |
|---|-------------|-------------|-------------|
| N | -0.93570405 | -1.24836624 | 3.23876357  |
| O | 0.34415352  | -1.09019613 | 3.31482434  |
| O | -1.43940258 | -0.99873585 | 2.06006813  |
| O | -1.62144125 | -1.59826958 | 4.17769480  |
| N | 3.27095509  | -0.53387046 | 2.02405071  |
| O | 2.58746672  | 0.56575447  | 1.86297381  |
| O | 2.62240124  | -1.60544312 | 1.71560931  |
| O | 4.41797590  | -0.53667080 | 2.42659807  |
| N | 1.84243453  | 0.41713357  | -1.33672225 |
| O | 2.36944222  | 0.76419461  | -2.37761378 |
| O | 1.88293147  | -0.81082040 | -0.90913099 |
| O | 1.19140172  | 1.22902310  | -0.57207644 |
| H | 0.78779459  | -5.22127151 | -2.85881329 |
| H | -0.60229719 | 4.94235897  | 0.31565481  |

**L2\*Am(NO<sub>3</sub>)<sub>3</sub>**

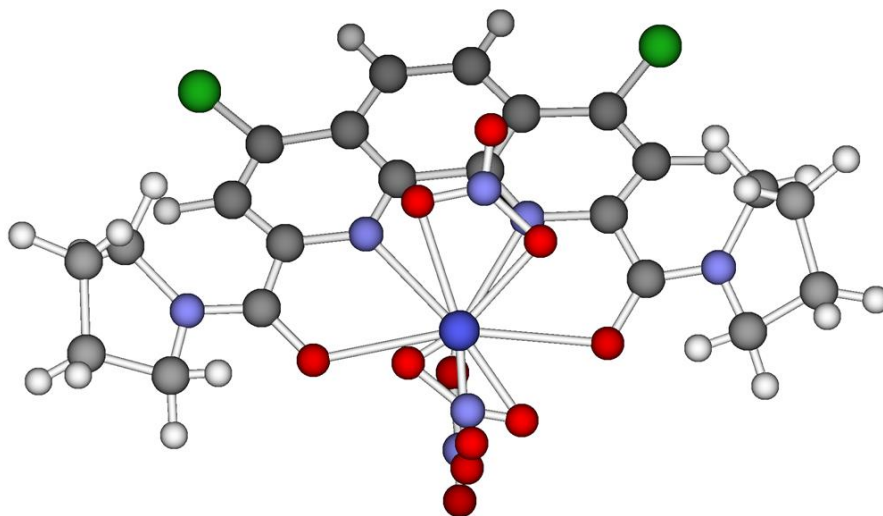

PBE/L1 theoretical level

E= -33403.593584

G= 218.5290 kcal/mol, H= 294.2819 kcal/mol, U= 293.6894 kcal/mol, S= 254.0765 cal/mol at T= 298.150 K

|    |             |             |             |
|----|-------------|-------------|-------------|
| Cl | -4.99025249 | 3.68193388  | -0.86140257 |
| Cl | -3.84908080 | -3.29197359 | -3.72857165 |
| N  | -1.47340620 | 1.07433367  | 0.29461485  |
| N  | -0.07207524 | 3.87620068  | 1.94335961  |

N -1.08135593 -1.37634170 -0.69966781  
N 1.21461034 -3.99234438 -1.24314868  
O -0.15003774 1.69898283 2.54635215  
O 0.51172435 -3.04631805 0.69195622  
C -1.60723412 2.30403185 0.78381664  
C -2.68598413 3.14155412 0.44321853  
H -2.79906774 4.12983131 0.88875711  
C -3.63259339 2.66926169 -0.44998515  
C -3.50235510 1.37949061 -1.02421999  
C -4.40930223 0.81026876 -1.96995842  
H -5.27386808 1.39909446 -2.28057361  
C -4.20530272 -0.44096071 -2.48246551  
H -4.90525293 -0.86087137 -3.20663500  
C -3.07854843 -1.22705317 -2.09037733  
C -2.78749251 -2.52684760 -2.57743311  
C -1.66063797 -3.20531607 -2.14500928  
H -1.44577515 -4.20852184 -2.51400518  
C -0.82685953 -2.58338881 -1.19746113  
C -2.15826106 -0.70373172 -1.13787663  
C -2.37291002 0.62518293 -0.59561676  
C -0.55275524 2.62774944 1.81993580  
C 0.36172345 -3.24060678 -0.52968001  
C -0.18249519 4.98397303 0.97158051  
H -0.98732585 5.68115616 1.26954889  
C 1.18891919 5.66400671 1.07552040  
H 1.91740096 5.10779381 0.46301553  
H 1.15867853 6.70795202 0.73042578  
C 1.52535927 5.51811075 2.56768441  
H 0.97372514 6.26775026 3.15929508  
H 2.59797931 5.63645554 2.77893853  
C 1.03994596 4.10274172 2.90253663



H 1.81250584 3.33305407 2.73290515  
H 0.67860925 3.98559713 3.93585372  
C 2.43915963 -4.49104595 -0.56298470  
H 2.18056297 -5.29517221 0.14314049  
H 2.87552595 -3.66257668 0.02112184  
C 3.33955431 -4.94176054 -1.71986985  
C 2.90080619 -4.03752375 -2.88221145  
C 1.37696373 -3.99208021 -2.71257472  
H 3.19579792 -4.41683245 -3.87163401  
H 3.30718112 -3.02121401 -2.75094819  
H 3.15397334 -6.00036383 -1.96794379  
H 4.40404797 -4.83007669 -1.46746314  
H 0.92371249 -3.09223914 -3.15166783  
La 0.54075778 -0.56361133 1.48560572  
N -1.48182309 -1.57339489 3.43639469  
O -0.22732911 -1.49386775 3.73346519  
O -1.80007648 -1.18559599 2.22823930  
O -2.32035136 -1.97913349 4.21764231  
N 3.17151093 -0.74826908 2.87606764  
O 2.44498587 0.33022791 2.89851761  
O 2.66264367 -1.74486196 2.21527457  
O 4.25156450 -0.81702518 3.43009377  
N 1.98283184 0.55249655 -0.95051062  
O 2.50978851 0.99965984 -1.95603263  
O 1.87848926 -0.72338581 -0.73784733  
O 1.48757160 1.31955886 -0.03166909  
H 0.90557724 -4.89034939 -3.15245461  
H -0.39437768 4.59620667 -0.03497869

**L2\*Cm(NO<sub>3</sub>)<sub>3</sub>**

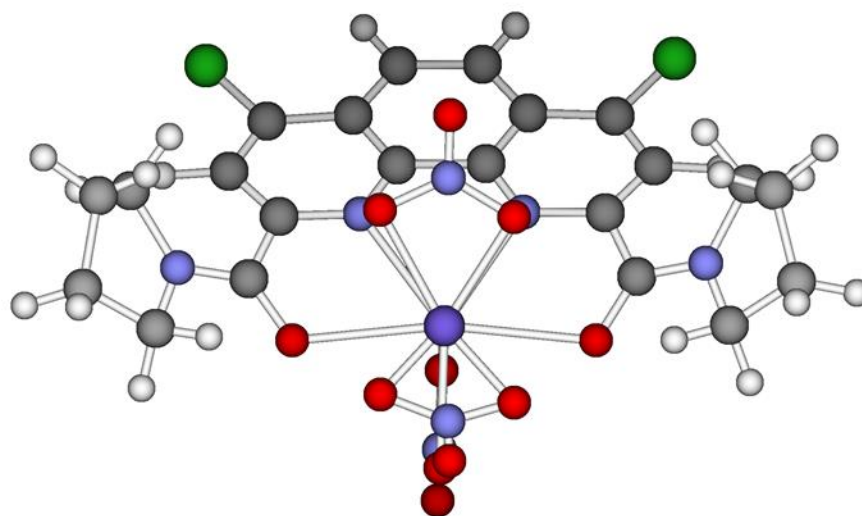

PBE/L1 theoretical level

E= -34239.911197

G= 216.4264 kcal/mol, H= 294.6924 kcal/mol, U= 294.0999 kcal/mol, S= 262.5054 cal/mol at T= 298.150 K

|    |             |             |             |
|----|-------------|-------------|-------------|
| Cl | -4.98590899 | 3.69758964  | -0.87716216 |
| Cl | -3.81569624 | -3.27557278 | -3.76647115 |
| N  | -1.45093322 | 1.09965909  | 0.24165782  |
| N  | -0.10156716 | 3.86424208  | 2.00851154  |
| N  | -1.04964995 | -1.33204007 | -0.75361097 |
| N  | 1.20016849  | -4.02689075 | -1.18988037 |
| O  | -0.10802089 | 1.65155339  | 2.46417904  |
| O  | 0.54082555  | -2.92052078 | 0.67114061  |
| C  | -1.59744966 | 2.31696749  | 0.75822753  |
| C  | -2.68456721 | 3.14939213  | 0.43121412  |
| H  | -2.81217074 | 4.12618065  | 0.89755571  |
| C  | -3.62173963 | 2.68799019  | -0.47845381 |
| C  | -3.48045325 | 1.40961885  | -1.07509696 |
| C  | -4.38058662 | 0.84166437  | -2.02836895 |
| H  | -5.24764872 | 1.42736816  | -2.33817077 |
| C  | -4.17129517 | -0.40816566 | -2.54427910 |
| H  | -4.86978054 | -0.82857710 | -3.26967621 |

C -3.04556298 -1.19452083 -2.14888597  
C -2.75617790 -2.50044775 -2.61971617  
C -1.63607717 -3.18009353 -2.16987753  
H -1.43044519 -4.19147062 -2.52110672  
C -0.80002844 -2.54963207 -1.22994220  
C -2.12617564 -0.66592515 -1.19940376  
C -2.34663129 0.65889829 -0.65429574  
C -0.54652315 2.61322284 1.80272114  
C 0.37526944 -3.19529796 -0.53388238  
C -0.25162670 5.03426886 1.11979771  
H -1.08311677 5.67758846 1.46300626  
C 1.09149408 5.75902414 1.28020155  
H 1.84283602 5.28313732 0.62909353  
H 1.01844513 6.82458925 1.01746285  
C 1.43378198 5.51175928 2.75780249  
H 0.85060620 6.18983936 3.40303683  
H 2.50030136 5.65791130 2.98132443  
C 1.00648773 4.05624676 2.97993779  
H 1.80690670 3.33287978 2.74674368  
H 0.65526032 3.84280610 4.00099421  
C 2.40147257 -4.52601576 -0.46995375  
H 2.10426044 -5.24733734 0.30661985  
H 2.88524842 -3.67245197 0.03586535  
C 3.26695514 -5.12954855 -1.58286667  
C 2.87334228 -4.30790901 -2.82056904  
C 1.35567522 -4.15531254 -2.65340304  
H 3.13708448 -4.79178905 -3.77247190  
H 3.34375787 -3.31184411 -2.78321695  
H 3.01812291 -6.19303751 -1.73560238  
H 4.33768415 -5.05790758 -1.34339356  
H 0.95597869 -3.26787615 -3.16439533

Cm 0.56096154 -0.48223004 1.31962037  
N -1.22655690 -1.50511062 3.36241746  
O 0.04598800 -1.37942708 3.55272341  
O -1.64603996 -1.14034605 2.17962790  
O -1.98414707 -1.92887473 4.21209526  
N 3.19567823 -0.60509259 2.55859780  
O 2.44702959 0.45724371 2.59579682  
O 2.67402530 -1.61304367 1.92980814  
O 4.29766989 -0.64764512 3.07000518  
N 1.93140638 0.61717063 -1.06375742  
O 2.44871855 1.06726646 -2.07148910  
O 1.84321070 -0.65817010 -0.83958364  
O 1.42540300 1.37593484 -0.14373136  
H 0.82987392 -5.05600071 -3.02114940  
H -0.44535422 4.71411228 0.08607770

**L3\*La(NO<sub>3</sub>)<sub>3</sub>**

**Searching the most stable geometry**

**Meso-form**

**isomer I**

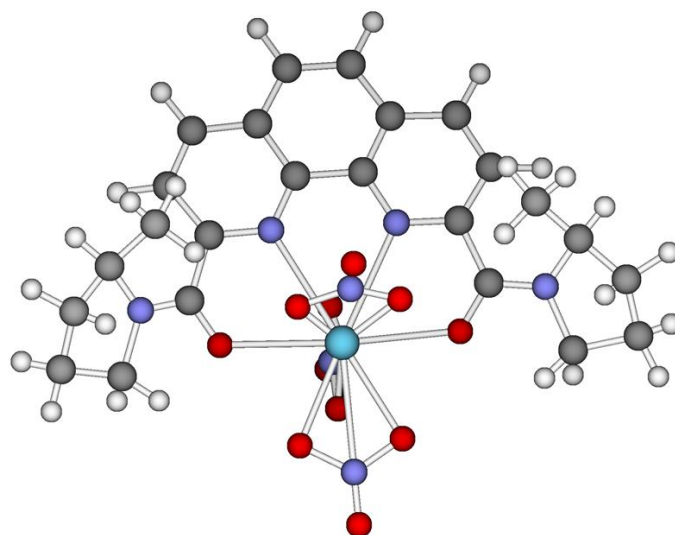

PBE/L1 theoretical level

E= -10635.454491

G= 263.6789 kcal/mol, H= 340.6639 kcal/mol, U= 340.0714 kcal/mol, S= 258.2090 cal/mol at T= 298.150 K

|   |             |             |             |
|---|-------------|-------------|-------------|
| N | -1.44597805 | 1.09205532  | 0.39710894  |
| N | -0.02985763 | 3.90292931  | 2.02853322  |
| N | -1.08161914 | -1.39246380 | -0.57429272 |
| N | 1.14159739  | -4.10608864 | -1.10950625 |
| O | -0.14541648 | 1.73291910  | 2.65400338  |
| O | 0.56630665  | -3.01339126 | 0.78466856  |
| C | -1.58548427 | 2.32124472  | 0.88543332  |
| C | -2.70205116 | 3.12989545  | 0.58487165  |
| H | -2.79899263 | 4.12162066  | 1.03031349  |
| C | -3.68096137 | 2.63281584  | -0.25656229 |
| C | -3.53975439 | 1.34175706  | -0.81165200 |
| C | -4.49688578 | 0.74382842  | -1.69418299 |
| H | -5.38779020 | 1.31730878  | -1.96483290 |
| C | -4.31126165 | -0.51770014 | -2.18835497 |
| H | -5.05208731 | -0.96280265 | -2.85835862 |
| C | -3.15316772 | -1.28607607 | -1.84078729 |
| C | -2.91055655 | -2.59751987 | -2.30585146 |
| C | -1.76010013 | -3.26157999 | -1.92006934 |
| H | -1.56014061 | -4.27833414 | -2.26289535 |
| C | -0.85813004 | -2.61437726 | -1.04898429 |
| C | -2.18277335 | -0.72707599 | -0.96410954 |
| C | -2.37866020 | 0.60834062  | -0.44192448 |
| C | -0.52157944 | 2.65815067  | 1.90510535  |
| C | 0.35390976  | -3.26233149 | -0.41998419 |
| C | -0.05558782 | 5.03112841  | 1.04589629  |
| H | -1.02675045 | 5.55522394  | 1.12826657  |
| C | 1.05800784  | 5.95678663  | 1.58365881  |
| H | 2.01295471  | 5.67319822  | 1.10873473  |
| H | 0.85154617  | 7.00972462  | 1.34016216  |
| C | 1.11809456  | 5.66662025  | 3.08595920  |

H 0.29618213 6.17619896 3.61647105  
H 2.06881309 5.97363091 3.54575539  
C 0.92379087 4.15215397 3.13515449  
C 2.23386621 -4.77654362 -0.36495513  
C 2.80023170 -5.75402212 -1.39308441  
C 2.66658902 -4.96865559 -2.70058942  
C 1.30552351 -4.24653196 -2.59078765  
H 2.71216273 -5.59453392 -3.60438180  
H 3.46495914 -4.20949316 -2.76528502  
H 2.19127464 -6.67318344 -1.42464113  
H 3.83843088 -6.03521585 -1.16376865  
La 0.56727129 -0.53692526 1.59062040  
N -1.44760180 -1.61769879 3.51563430  
O -0.19180927 -1.55156159 3.80821419  
O -1.77316833 -1.17816627 2.32790828  
O -2.28196096 -2.05723381 4.28404379  
N 3.15994167 -0.71928245 3.04778600  
O 2.39048767 0.32493058 3.12512302  
O 2.71915913 -1.67739570 2.28764176  
O 4.21930790 -0.79363531 3.64068437  
N 2.00718045 0.63798046 -0.82482588  
O 2.51096320 1.11545932 -1.82949901  
O 1.85377491 -0.63908654 -0.67130286  
O 1.58603525 1.37753022 0.15241556  
H 0.51364666 -4.91692257 -2.97577882  
C 1.30127800 -2.92081022 -3.35417247  
C 0.20346065 4.61020041 -0.40190300  
H -4.56789112 3.22780013 -0.49151853  
H -3.63861775 -3.08095002 -2.96316838  
H 0.50388396 3.77281833 4.07808542  
H 1.82872987 -5.24741745 0.54257369

H 1.07403982 3.93669724 -0.45440930  
H 0.40759411 5.51204205 -1.00106978  
H -0.65319842 4.09466410 -0.85808367  
H 1.86192310 3.60021281 2.94584846  
H 2.97720337 -4.02532196 -0.04294547  
H 0.29987350 -2.47553825 -3.43496895  
H 1.67009568 -3.10139680 -4.37656689  
H 1.95974410 -2.19060349 -2.85662103  
PBE0/L1 theoretical level  
E= -10635.344113  
N -1.44017208 1.08010721 0.39978653  
N -0.02473555 3.85982203 2.01135445  
N -1.07594860 -1.38615501 -0.56774908  
N 1.14358640 -4.05498266 -1.09397960  
O -0.13621764 1.71061003 2.62483287  
O 0.55704588 -2.98616409 0.78272402  
C -1.57726669 2.29385805 0.88565636  
C -2.68375683 3.10056877 0.59094250  
H -2.78074980 4.08188248 1.03877878  
C -3.65124869 2.61068034 -0.25021821  
C -3.50792122 1.33037543 -0.80530882  
C -4.45805407 0.73911631 -1.69142294  
H -5.33920002 1.31095040 -1.96417487  
C -4.27377987 -0.50960797 -2.18111372  
H -5.00556040 -0.94990814 -2.85076904  
C -3.12313724 -1.27690411 -1.82782376  
C -2.88513780 -2.58114815 -2.28623509  
C -1.74769950 -3.24301863 -1.89673364  
H -1.55073202 -4.25447845 -2.23004222  
C -0.85551620 -2.59600830 -1.03227866  
C -2.16608000 -0.72485054 -0.95670158

C -2.36200786 0.60226190 -0.43615448  
C -0.51178569 2.62915421 1.89249218  
C 0.35385177 -3.23550415 -0.40790221  
C -0.06230564 4.97710037 1.03836739  
H -1.02412915 5.49869967 1.12795913  
C 1.04847491 5.89782619 1.55905282  
H 1.99190509 5.61643028 1.07826555  
H 0.84020883 6.94308662 1.31959927  
C 1.12436259 5.60846519 3.05038142  
H 0.31047922 6.11030722 3.58434772  
H 2.07131171 5.91584015 3.49861312  
C 0.93491960 4.10340405 3.09761429  
C 2.23639870 -4.70949125 -0.36106434  
C 2.78967047 -5.68721104 -1.38149607  
C 2.64238262 -4.91449738 -2.68339372  
C 1.29231751 -4.19650078 -2.56170249  
H 2.67798519 -5.54070139 -3.57775187  
H 3.43481135 -4.16171837 -2.75923014  
H 2.18319225 -6.59889269 -1.40104544  
H 3.82267213 -5.96545029 -1.16329587  
La 0.56019700 -0.54418927 1.59736121  
N -1.47126758 -1.58540332 3.49378395  
O -0.24316484 -1.52272832 3.79725671  
O -1.77317417 -1.17221546 2.32134271  
O -2.30380416 -2.00261021 4.24792671  
N 3.14786530 -0.72178710 3.02314234  
O 2.40849662 0.31310287 3.08126998  
O 2.69850707 -1.67399859 2.30739403  
O 4.19642735 -0.79279917 3.59847164  
N 1.97660387 0.61019081 -0.81333798  
O 2.46544862 1.07277215 -1.81011069



O 1.84746671 -0.64137721 -0.64516044  
 O 1.55148971 1.34400654 0.13110547  
 H 0.50373352 -4.85948372 -2.94051313  
 C 1.28899801 -2.87973714 -3.32133269  
 C 0.18554343 4.56190157 -0.40279403  
 H -4.53031015 3.20265365 -0.48461801  
 H -3.60614443 -3.06070852 -2.94067430  
 H 0.53125262 3.72579575 4.03870106  
 H 1.84670281 -5.17277193 0.54702890  
 H 1.05472052 3.90019870 -0.46154508  
 H 0.37905076 5.45977497 -0.99724233  
 H -0.66410887 4.04481697 -0.85162359  
 H 1.86482835 3.55935693 2.89559507  
 H 2.97651482 -3.95994616 -0.05761048  
 H 0.29827785 -2.42733169 -3.38922715  
 H 1.64039457 -3.06314993 -4.34108257  
 H 1.95702171 -2.16168690 -2.83668756

**Isomer II**

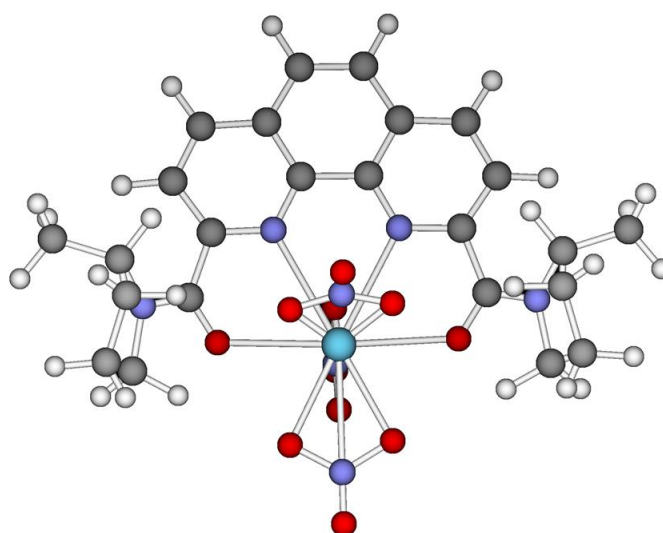

PBE/L1 theoretical level

E= -10635.456307

G= 263.8496 kcal/mol, H= 340.8597 kcal/mol, U= 340.2672 kcal/mol, S= 258.2931 cal/mol at T= 298.150 K

N -1.17241383 0.96142858 0.83379543  
N 0.24370649 3.77230263 2.46521974  
N -0.80805498 -1.52309060 -0.13760617  
N 1.41516161 -4.23671532 -0.67281973  
O 0.12814763 1.60229230 3.09068990  
O 0.83987075 -3.14401793 1.22135508  
C -1.31192017 2.19061804 1.32211983  
C -2.42848706 2.99926877 1.02155817  
H -2.52542853 3.99099398 1.46700001  
C -3.40739727 2.50218916 0.18012422  
C -3.26619029 1.21113038 -0.37496546  
C -4.22332191 0.61320168 -1.25749648  
H -5.11422634 1.18668199 -1.52814639  
C -4.03769779 -0.64832687 -1.75166845  
H -4.77852345 -1.09342933 -2.42167211  
C -2.87960362 -1.41670275 -1.40410078  
C -2.63699245 -2.72814655 -1.86916494  
C -1.48653603 -3.39220667 -1.48338282  
H -1.28657651 -4.40896082 -1.82620883  
C -0.58456594 -2.74500394 -0.61229777  
C -1.90920925 -0.85770273 -0.52742302  
C -2.10509610 0.47771388 -0.00523797  
C -0.24801534 2.52752399 2.34179187  
C 0.62747389 -3.39295816 0.01670232  
C 0.21797630 4.90050173 1.48258281  
H -0.75318629 5.42459726 1.56495309  
C 1.33157206 5.82615995 2.02034545  
H 2.28651881 5.54257154 1.54542124  
H 1.12511027 6.87909794 1.77684867  
C 1.39165878 5.53599358 3.52264571  
H 0.56974626 6.04557228 4.05315781

H 2.34237719 5.84300423 3.98244190  
C 1.19735503 4.02152729 3.57184100  
C 2.50743032 -4.90717030 0.07173139  
C 3.07379580 -5.88464880 -0.95639789  
C 2.94015312 -5.09928226 -2.26390290  
C 1.57908773 -4.37715864 -2.15410113  
H 2.98572683 -5.72516060 -3.16769528  
H 3.73852324 -4.34011984 -2.32859850  
H 2.46483874 -6.80381012 -0.98795462  
H 4.11199474 -6.16584253 -0.72708213  
H 0.78721076 -5.04754925 -2.53909230  
C 1.57484221 -3.05143690 -2.91748595  
C 0.47702476 4.47957373 0.03478351  
H -4.29432726 3.09717345 -0.05483201  
H -3.36505365 -3.21157670 -2.52648187  
H 0.77744806 3.64219165 4.51477194  
H 2.10229397 -5.37804413 0.97926021  
H 1.34760404 3.80607057 -0.01772279  
H 0.68115824 5.38141537 -0.56438327  
H -0.37963432 3.96403742 -0.42139712  
H 2.13548732 3.46958613 3.38253498  
H 3.25076747 -4.15594864 0.39374107  
H 0.57343763 -2.60616493 -2.99828243  
H 1.94365978 -3.23202348 -3.93988037  
H 2.23330832 -2.32123017 -2.41993451  
PBE0/L1 theoretical level  
E= -10635.345939  
N -1.55660117 1.06382072 0.38054192  
N -0.02002519 3.74397993 1.96948862  
N -1.18622148 -1.40111911 -0.58099234  
N 1.13811362 -3.94141030 -1.03438938

O -0.38331860 1.64902425 2.68560886  
O 0.32391596 -3.04366636 0.85393894  
C -1.67762804 2.28700900 0.85069638  
C -2.71956444 3.13643813 0.45922622  
H -2.81301761 4.12423038 0.89086413  
C -3.63685584 2.67963219 -0.45535111  
C -3.50378871 1.39176595 -0.99345517  
C -4.39577770 0.83613425 -1.96020830  
H -5.23166037 1.43829787 -2.30148625  
C -4.20850039 -0.41325933 -2.44692254  
H -4.89259720 -0.82371122 -3.18266177  
C -3.11249018 -1.21763766 -2.01018906  
C -2.85790086 -2.51418018 -2.47919369  
C -1.76742399 -3.20760918 -2.01385164  
H -1.56170702 -4.21216059 -2.35929918  
C -0.94279033 -2.60365200 -1.05696523  
C -2.22352624 -0.70706129 -1.04717636  
C -2.42276263 0.62065089 -0.52961189  
C -0.64508748 2.57191539 1.91110599  
C 0.23044080 -3.24271870 -0.35920712  
C 0.03686106 4.75584507 0.90322542  
C -0.70020235 6.03242111 1.28366423  
C 1.54588962 4.96437359 0.76958007  
H 1.96712935 4.12885380 0.20238425  
H 1.78963220 5.90144396 0.26345626  
C 2.03370595 4.91226339 2.21697903  
H 1.90406275 5.88044357 2.70847869  
H 3.08935332 4.64252853 2.28794789  
C 1.15148151 3.84348416 2.86269331  
C 2.38071299 -4.30362463 -0.32389164  
C 3.43654370 -4.39668036 -1.42566204

C 2.83429193 -3.59444261 -2.57862186  
C 1.34362912 -3.92431498 -2.49097013  
H 3.25692892 -3.85148454 -3.55278420  
H 2.96830463 -2.52339244 -2.39939237  
H 3.60869670 -5.43565559 -1.72006547  
H 4.38997412 -3.98460603 -1.08897519  
La 0.31969270 -0.60395378 1.66635013  
N -1.79581189 -1.62528753 3.46934557  
O -0.57836175 -1.57976460 3.82048655  
O -2.04663396 -1.20248628 2.28861070  
O -2.66075635 -2.03544784 4.18893051  
N 2.90358567 -0.78010923 3.11625981  
O 2.15603209 0.24845318 3.18023014  
O 2.45592141 -1.73614061 2.40452361  
O 3.95758986 -0.84204942 3.68215871  
N 1.90517867 0.54096204 -0.65343237  
O 2.49084496 0.99850881 -1.59895027  
O 1.72439373 -0.70790654 -0.51451874  
O 1.42590845 1.27854812 0.26191574  
C 0.99958491 -5.25997019 -3.13546634  
H 0.73991227 -3.12442708 -2.92678738  
H -0.38219017 4.33253717 -0.01288770  
H -4.46667719 3.30789900 -0.76308584  
H -3.52641082 -2.96386456 -3.20645380  
H 0.83540541 4.09505272 3.87827039  
H 2.24482203 -5.23659801 0.22898404  
H 1.63703883 2.86436033 2.89906335  
H 2.60051131 -3.51624513 0.40242606  
H 1.63971090 -6.05936670 -2.75364709  
H 1.14366627 -5.19487381 -4.21771812  
H -0.03657906 -5.55186319 -2.94649839

|   |             |            |            |
|---|-------------|------------|------------|
| H | -0.64707118 | 6.74882603 | 0.45888644 |
| H | -0.25551894 | 6.49600124 | 2.16793370 |
| H | -1.75400901 | 5.84703779 | 1.50651395 |

**Isomer III**

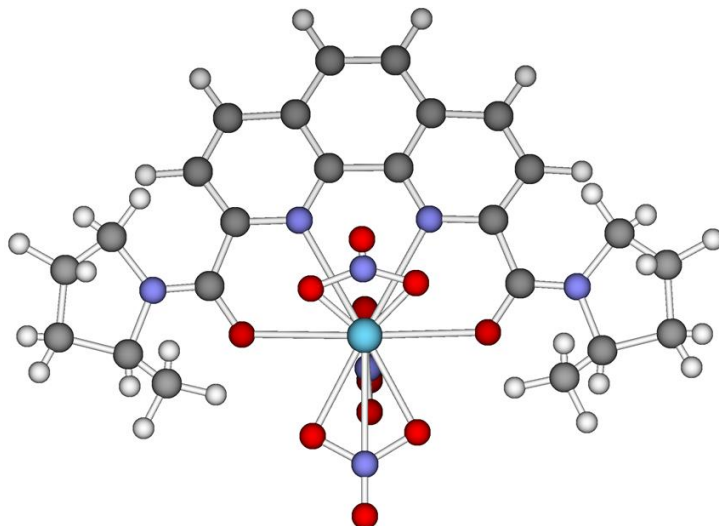

PBE/L1 theoretical level

E= -10635.455985

G= 263.7182 kcal/mol, H= 340.8577 kcal/mol, U= 340.2652 kcal/mol, S= 258.7273 cal/mol at T= 298.150 K

|   |             |             |             |
|---|-------------|-------------|-------------|
| N | -1.54059196 | 1.22967982  | 0.04501355  |
| N | -0.26542661 | 4.05506277  | 1.80885231  |
| N | -1.16483450 | -1.28571105 | -0.94009489 |
| N | 0.97218847  | -4.10505056 | -1.41020024 |
| O | -0.25335339 | 1.84643412  | 2.31203604  |
| O | 0.50131565  | -2.86733747 | 0.42462417  |
| C | -1.70634890 | 2.45362401  | 0.54886776  |
| C | -2.81886744 | 3.25369930  | 0.21365499  |
| H | -2.96430492 | 4.22818279  | 0.67791969  |
| C | -3.75048852 | 2.76972175  | -0.68492573 |
| C | -3.57646179 | 1.49319267  | -1.25607371 |
| C | -4.49958515 | 0.92372173  | -2.19047880 |
| H | -5.36677694 | 1.51627791  | -2.49467516 |
| C | -4.31026173 | -0.33430812 | -2.68532133 |

H -5.02320862 -0.76678813 -3.39270902  
C -3.18342471 -1.12054002 -2.28342795  
C -2.96615076 -2.43857408 -2.73224688  
C -1.85541427 -3.13803625 -2.29995418  
H -1.69941652 -4.16560602 -2.62502527  
C -0.95775086 -2.51875710 -1.40464127  
C -2.23347545 -0.58772475 -1.36552775  
C -2.43396187 0.75094748 -0.84051734  
C -0.67954683 2.78929710 1.61678660  
C 0.23536849 -3.19269514 -0.74912375  
C -0.60054797 5.25244093 1.00995338  
H -1.61325514 5.61513615 1.26204860  
C 0.43339497 6.29073906 1.46215880  
H 1.35976493 6.19106007 0.87563354  
H 0.05546110 7.31617880 1.33757687  
C 0.67409670 5.90220547 2.92811871  
H -0.17200972 6.23583746 3.55243874  
H 1.59913230 6.32829332 3.34214878  
C 0.73385239 4.36501026 2.88258648  
C 2.14298344 -4.75220537 -0.73343891  
C 2.46897388 -5.90136957 -1.70327270  
C 2.14476466 -5.30481577 -3.08061218  
C 0.83884782 -4.54642344 -2.81402016  
H 2.01890182 -6.06533861 -3.86558127  
H 2.93428469 -4.60628653 -3.39808345  
H 1.81887341 -6.77015734 -1.50410914  
H 3.51594734 -6.22295284 -1.60714805  
La 0.43659413 -0.41513315 1.24514234  
N -1.61833298 -1.54102695 3.11049700  
O -0.36831233 -1.49891710 3.42454696  
O -1.92138577 -1.05873311 1.93254876

O -2.47078085 -1.99639189 3.85006690  
N 2.97513485 -0.62304306 2.81504297  
O 2.17771864 0.39652038 2.91406751  
O 2.58295822 -1.55132163 1.99479723  
O 4.01360559 -0.70394498 3.44278717  
N 1.93044508 0.77957857 -1.10658348  
O 2.46970510 1.26810086 -2.08553004  
O 1.74390328 -0.49728134 -0.98656046  
O 1.50119352 1.50633812 -0.12120864  
H -0.01384935 -5.24087381 -2.92181706  
H 0.68738472 -3.68753171 -3.48561454  
H -0.55764532 5.03259230 -0.06779330  
C 2.13124657 3.82731223 2.56352687  
C 3.31392050 -3.78627062 -0.53392988  
H -4.63065767 3.36309600 -0.94736385  
H -3.68603754 -2.90315986 -3.41162133  
H 0.37208489 3.90354109 3.81615710  
H 2.14360213 2.72940564 2.53378987  
H 2.82077718 4.14912605 3.36068511  
H 2.50230789 4.20975161 1.59988844  
H 3.65044165 -3.35649824 -1.49036551  
H 4.15196180 -4.33974648 -0.08044785  
H 3.04896379 -2.96634340 0.14685173  
H 1.80036569 -5.11521053 0.24923036  
PBE0/L1 theoretical level  
E= -10635.345749  
N -1.54756141 1.20769346 0.06408280  
N -0.25153363 4.00571442 1.77695799  
N -1.16983557 -1.28436470 -0.91777045  
N 0.97155124 -4.04568148 -1.39811444  
O -0.24948978 1.82340515 2.29512691



O 0.46270919 -2.87208414 0.44450021  
C -1.70805347 2.41720486 0.56305826  
C -2.81197405 3.21510577 0.23730826  
H -2.95279193 4.18176699 0.69951701  
C -3.74018836 2.73395252 -0.65021473  
C -3.56789136 1.46613526 -1.21746504  
C -4.49054718 0.89727920 -2.14492011  
H -5.35387802 1.48332965 -2.44306421  
C -4.30147886 -0.34773594 -2.63591671  
H -5.01027203 -0.77913415 -3.33534861  
C -3.17417383 -1.12715065 -2.24003696  
C -2.95531631 -2.43478346 -2.68841267  
C -1.84937263 -3.12496781 -2.26258898  
H -1.68849516 -4.14423561 -2.58367753  
C -0.96145278 -2.50253153 -1.37626946  
C -2.23398447 -0.59657115 -1.33469534  
C -2.43563366 0.73285323 -0.81070542  
C -0.67202860 2.75509143 1.60892534  
C 0.22752565 -3.17077708 -0.72723520  
C -0.58343881 5.18107891 0.96717256  
H -1.57346666 5.56773663 1.23539126  
C 0.47397718 6.20122957 1.36923897  
H 1.38041782 6.06176853 0.77453953  
H 0.12065751 7.22428370 1.22433376  
C 0.73004699 5.84647322 2.83032608  
H -0.09509099 6.20747519 3.45382380  
H 1.66234696 6.26171827 3.21753812  
C 0.76068825 4.31846905 2.81742716  
C 2.13024426 -4.69957638 -0.73870200  
C 2.49654341 -5.78000069 -1.75577378  
C 2.19429445 -5.11409760 -3.09419370

C 0.87439221 -4.40668106 -2.81505680  
H 2.10418630 -5.82036352 -3.92216969  
H 2.96908855 -4.38515282 -3.34533572  
H 1.86006069 -6.66166115 -1.62353992  
H 3.53867960 -6.08832073 -1.65360892  
La 0.40436295 -0.44383353 1.28032458  
N -1.69364583 -1.48415780 3.11144114  
O -0.47684544 -1.43549430 3.45436215  
O -1.95463228 -1.05808222 1.93275809  
O -2.55500984 -1.89980221 3.83383489  
N 2.89972377 -0.69121778 2.87077761  
O 2.17721939 0.35583732 2.89484739  
O 2.47941971 -1.62290084 2.11296844  
O 3.90538144 -0.79165775 3.51361465  
N 1.90485346 0.70752978 -1.06337225  
O 2.43310237 1.17182279 -2.03733373  
O 1.75457323 -0.54458851 -0.90951598  
O 1.45478559 1.43856609 -0.12677860  
H 0.05001111 -5.11035442 -2.97872519  
H 0.71780080 -3.52250767 -3.43743396  
H -0.57043600 4.94208002 -0.09883195  
C 2.13522339 3.76002955 2.48461032  
C 3.27312255 -3.73365545 -0.46881467  
H -4.61451006 3.32334661 -0.90726954  
H -3.66952038 -2.89880013 -3.36109781  
H 0.41444612 3.88745570 3.76134801  
H 2.13207865 2.67030859 2.47033167  
H 2.83892393 4.08107853 3.25859022  
H 2.49040103 4.12197685 1.51589775  
H 3.60966754 -3.24524879 -1.38737142  
H 4.11048126 -4.29444122 -0.04259260

H 2.98757720 -2.96611381 0.25022846

H 1.78198385 -5.12106991 0.20875096

### Isomer IV

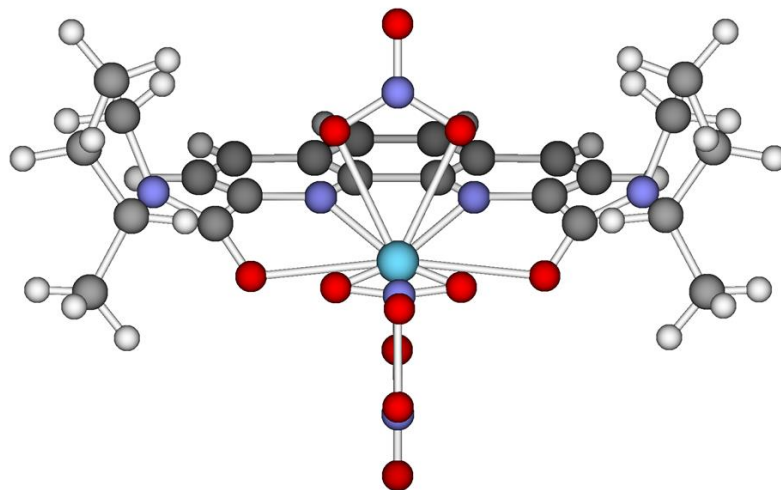

PBE/L1 theoretical level

E= -10635.462096

G= 263.0940 kcal/mol, H= 340.8312 kcal/mol, U= 340.2387 kcal/mol, S= 260.7318 cal/mol at T= 298.150 K

N -1.62054837 1.18107092 0.09102554

N -0.16753648 3.96441054 1.68982363

N -1.24498236 -1.29039192 -0.89841092

N 1.02857292 -3.92182326 -1.47003460

O -0.33513951 1.80291641 2.36340666

O 0.39040676 -2.92324662 0.46612322

C -1.75181401 2.41318560 0.57538277

C -2.83636189 3.24699664 0.22998819

H -2.93016815 4.24006462 0.67336184

C -3.79126501 2.77108192 -0.65176922

C -3.65452981 1.47873592 -1.20483911

C -4.58048487 0.90402722 -2.13542390

H -5.44904327 1.49431086 -2.44033241

C -4.38993025 -0.35359275 -2.63803029

H -5.10478115 -0.77796936 -3.34843326

C -3.25717545 -1.14217365 -2.25253177  
C -3.00080204 -2.44402838 -2.73644876  
C -1.87008286 -3.12360668 -2.31776571  
H -1.66025102 -4.13345909 -2.67508340  
C -1.00526381 -2.50232792 -1.39204824  
C -2.32359171 -0.60950768 -1.32146454  
C -2.52545238 0.72072971 -0.78938383  
C -0.69297713 2.72945905 1.60934210  
C 0.20163496 -3.14728141 -0.74599302  
C -0.18030541 4.97745800 0.61575550  
H -0.84403181 5.81923866 0.88687092  
C 1.28391409 5.42913389 0.56836092  
H 1.87246382 4.67943859 0.01431258  
H 1.40092230 6.40925407 0.08248914  
C 1.67407656 5.43012810 2.05230403  
H 1.29071581 6.33948898 2.54827404  
H 2.76158953 5.38642645 2.21136308  
C 0.97852230 4.18480492 2.63256860  
C 0.51684541 4.33124733 4.07912493  
C 2.28512430 -4.41730595 -0.81732035  
C 2.02950811 -5.61228848 0.09587370  
C 3.20844960 -4.71091509 -2.01431441  
C 2.67717028 -3.81048799 -3.13739777  
C 1.15975428 -3.90385723 -2.94055033  
H 2.98632288 -4.13317251 -4.14275932  
H 2.99575782 -2.76685834 -2.98000646  
H 3.12222457 -5.77353144 -2.30289912  
H 4.25991583 -4.50927496 -1.76208150  
La 0.37771359 -0.45207366 1.27841938  
N -1.62787914 -1.53690076 3.20778418  
O -0.37170804 -1.46188366 3.49936438

O -1.95638645 -1.10758734 2.01726294  
O -2.45891786 -1.97535670 3.97994661  
N 2.99393415 -0.62330180 2.70588422  
O 2.22698402 0.42325351 2.78150630  
O 2.54018879 -1.59047484 1.96558380  
O 4.06220245 -0.69114733 3.28333855  
N 1.85043931 0.73490673 -1.11100256  
O 2.40651655 1.21283448 -2.08670449  
O 1.68654346 -0.54313391 -0.96905929  
O 1.38382161 1.47417080 -0.15363438  
H 0.76279932 -4.83995962 -3.37504816  
H 0.61711150 -3.04972053 -3.36862206  
H -0.52535337 4.53679276 -0.32977891  
H 2.98502445 -5.94908619 0.52880615  
H 1.58500361 -6.45121765 -0.46417102  
H 1.36404133 -5.33076763 0.92478460  
H 0.02996120 3.40810513 4.42548656  
H -0.17989007 5.17829323 4.18912172  
H 1.39230180 4.51363277 4.72270823  
H 1.62777102 3.29480815 2.54946017  
H 2.67564774 -3.57884550 -0.21318129  
H -4.65432978 3.38581228 -0.92181987  
H -3.70091391 -2.90765953 -3.43686461  
PBE0/L1 theoretical level  
E= -10635.352441  
N -1.61289525 1.17028272 0.09983227  
N -0.15934543 3.92396307 1.67508602  
N -1.23611057 -1.28111112 -0.88728690  
N 1.03036380 -3.87698507 -1.45363569  
O -0.32059598 1.78372526 2.33848643  
O 0.39332154 -2.88800859 0.46009299

C -1.73981655 2.38793516 0.57990015  
C -2.81206203 3.22138262 0.23736238  
H -2.90220976 4.20662355 0.67856133  
C -3.75759315 2.75154138 -0.64096093  
C -3.62119460 1.46836686 -1.19077849  
C -4.53993702 0.89998722 -2.12447453  
H -5.40043736 1.48713684 -2.42878747  
C -4.34803724 -0.34294543 -2.62631702  
H -5.05315876 -0.76203334 -3.33693695  
C -3.22050357 -1.12877941 -2.23895717  
C -2.96022964 -2.41774750 -2.72696996  
C -1.83933222 -3.09212852 -2.30857301  
H -1.62419736 -4.09128189 -2.66755724  
C -0.99165159 -2.47582150 -1.37938929  
C -2.30417800 -0.60546780 -1.30870485  
C -2.50770855 0.71537095 -0.77610296  
C -0.67945242 2.70327568 1.60082555  
C 0.21102382 -3.11421609 -0.73741579  
C -0.18534441 4.92906666 0.61045182  
H -0.86103326 5.75209522 0.87499851  
C 1.25991440 5.40765858 0.57280171  
H 1.86231756 4.67961884 0.02053692  
H 1.35819817 6.38645029 0.09811467  
C 1.64059639 5.40515709 2.04827595  
H 1.23343897 6.29339218 2.54594970  
H 2.71999121 5.38728952 2.21285200  
C 0.97573507 4.14687490 2.60724735  
C 0.52104598 4.26722527 4.04795456  
C 2.26561999 -4.38456345 -0.80289620  
C 1.98898125 -5.55746794 0.11678141  
C 3.17209387 -4.71254683 -1.98975587

C 2.66996908 -3.80690885 -3.10776496  
C 1.16047776 -3.85668015 -2.91192317  
H 2.96780372 -4.13814116 -4.10505772  
H 3.01598310 -2.78006411 -2.95352936  
H 3.05037522 -5.76523113 -2.27167606  
H 4.22251987 -4.54572964 -1.74212217  
La 0.38035148 -0.45137867 1.27900124  
N -1.61863565 -1.52710283 3.18708372  
O -0.38694885 -1.45532358 3.47706103  
O -1.93809462 -1.10566401 2.02265072  
O -2.43740797 -1.95979559 3.94715238  
N 3.00347233 -0.60307813 2.65235400  
O 2.24915528 0.41909939 2.73719716  
O 2.55179262 -1.55742288 1.94087780  
O 4.06731462 -0.66097808 3.20038772  
N 1.79082477 0.73159063 -1.12185335  
O 2.29892731 1.20469332 -2.10321140  
O 1.65402031 -0.52220535 -0.97241449  
O 1.35202456 1.45595324 -0.17526565  
H 0.74181378 -4.77209330 -3.34861732  
H 0.64984369 -2.99118590 -3.33624291  
H -0.50989133 4.48844194 -0.33312902  
H 2.93173170 -5.91414452 0.54174381  
H 1.52135479 -6.38110685 -0.43212759  
H 1.34009588 -5.25580692 0.94133008  
H 0.05806440 3.33787370 4.38546181  
H -0.18898781 5.09209013 4.16564369  
H 1.38826966 4.46298409 4.68536520  
H 1.63969147 3.28000951 2.50994349  
H 2.67783952 -3.55542803 -0.21597587  
H -4.61120749 3.36459613 -0.91207206

H -3.64816093 -2.87517738 -3.43088198

**Isomer V**

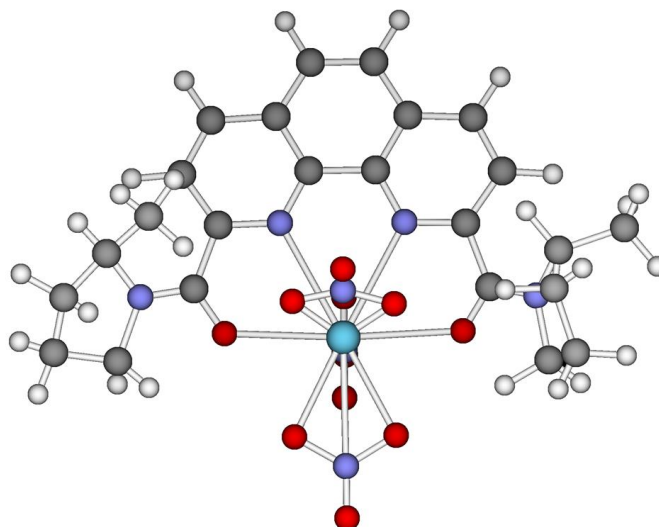

PBE/L1 theoretical level

E= -10635.455224

G= 263.7891 kcal/mol, H= 340.7851 kcal/mol, U= 340.1926 kcal/mol, S= 258.2460 cal/mol at T= 298.150 K

H -4.50013685 3.34682775 -0.55275947

H -3.73768735 -3.01425028 -2.95088458

N -1.45774174 1.12382317 0.39231753

N 0.04129174 3.93025589 1.96447229

N -1.17408419 -1.38943899 -0.52872932

N 1.07611978 -4.03109932 -1.02100897

O -0.10449083 1.76957357 2.61465621

O 0.35455397 -3.06977034 0.90383488

C -1.55508900 2.36687660 0.85448140

C -2.64456344 3.20536065 0.53626990

H -2.71238518 4.20655060 0.96539718

C -3.63460755 2.72690701 -0.30310234

C -3.53150797 1.42423570 -0.83916706

C -4.49656010 0.84717125 -1.72722554

H -5.36434269 1.44616580 -2.01686311

C -4.34448624 -0.42467701 -2.20607018



H -5.08917141 -0.85244340 -2.88303375  
C -3.21717000 -1.22677946 -1.83342397  
C -3.00761509 -2.54861689 -2.28309727  
C -1.88796508 -3.24837041 -1.86808586  
H -1.71891952 -4.27496719 -2.19531560  
C -0.98310530 -2.62633419 -0.98273015  
C -2.24360847 -0.69092739 -0.94624156  
C -2.40019751 0.65776521 -0.44550401  
C -0.47332266 2.69238281 1.85894644  
C 0.20711420 -3.28488803 -0.31596106  
C 0.03945754 5.04153728 0.96168733  
H -0.92080408 5.58648348 1.03272235  
C 0.29115897 4.58831930 -0.47761443  
C 1.17100585 5.95467472 1.48364294  
H 2.11963844 5.64793396 1.01057732  
H 0.98256373 7.00747395 1.22549379  
C 1.22953224 5.68511772 2.98979187  
H 0.41831574 6.21696711 3.51471853  
H 2.18673325 5.98110962 3.44319153  
C 1.00715816 4.17552519 3.06111550  
H 1.93406057 3.60428786 2.87355304  
H 0.58655274 3.81646872 4.01159334  
C 2.34521031 -4.42203808 -0.34703815  
H 2.20313787 -5.35349226 0.22322141  
H 2.60820389 -3.62924600 0.37219504  
C 3.36396098 -4.55113649 -1.49250054  
C 2.74034834 -3.73111606 -2.63536358  
C 1.23476279 -4.02551937 -2.49792290  
H 3.12709188 -4.00293636 -3.62904000  
H 2.90529704 -2.65518928 -2.46252656  
H 3.49616051 -5.60370064 -1.78937602

H 4.34841681 -4.16427660 -1.19021332  
H 0.63167524 -3.20378184 -2.91434288  
C 0.82545120 -5.36024380 -3.13003564  
La 0.48491719 -0.55835307 1.61711633  
N -1.56828308 -1.45312846 3.59198928  
O -0.30904379 -1.42968094 3.87826490  
O -1.87871182 -1.05701923 2.38529015  
O -2.41768742 -1.81662655 4.38276482  
N 3.10104895 -0.84228086 3.02199960  
O 2.40749359 0.25574464 3.05942917  
O 2.56538868 -1.81238496 2.34131122  
O 4.17590094 -0.95442200 3.57970071  
N 1.99464095 0.42751253 -0.84555244  
O 2.54333472 0.82561713 -1.86116254  
O 1.81083405 -0.83492333 -0.61359686  
O 1.55598867 1.23764873 0.06405666  
H 0.94646335 -5.30477428 -4.22352600  
H 1.44824338 -6.18741751 -2.75654840  
H -0.22439988 -5.61187506 -2.91493821  
H 0.51048666 5.47450542 -1.09444034  
H 1.15115523 3.90044641 -0.51735783  
H -0.57318211 4.07685566 -0.92350250  
PBE0/L1 theoretical level  
E=-10635.345108  
H -4.45968390 3.33162498 -0.56051290  
H -3.68658519 -2.97851467 -2.95460582  
N -1.45670366 1.11826146 0.39630508  
N 0.04223683 3.88584352 1.95744860  
N -1.17315555 -1.37800622 -0.51807320  
N 1.07469344 -3.98184657 -1.00904310  
O -0.12310933 1.74955928 2.60148311

O 0.36927888 -3.01513958 0.88915563  
C -1.55347002 2.34604836 0.85619754  
C -2.62940359 3.18412209 0.53723562  
H -2.69695139 4.17609596 0.96648914  
C -3.60475683 2.71325755 -0.30593050  
C -3.49929023 1.42022872 -0.83947152  
C -4.45357370 0.85071963 -1.73568726  
H -5.31028080 1.44839764 -2.02996826  
C -4.30004740 -0.40702724 -2.21256542  
H -5.03192854 -0.82861984 -2.89403892  
C -3.18173480 -1.20826650 -1.83091295  
C -2.96990633 -2.51890683 -2.28141856  
C -1.86279082 -3.21492910 -1.86202955  
H -1.69128191 -4.23178148 -2.18949866  
C -0.97655934 -2.59803581 -0.97070122  
C -2.22837687 -0.68259019 -0.94001442  
C -2.38588238 0.65799612 -0.44125697  
C -0.47765270 2.66667032 1.85686517  
C 0.21599007 -3.24364400 -0.31257352  
C 0.03916321 4.98693228 0.96541250  
H -0.90923518 5.53468180 1.03919959  
C 0.28527394 4.53920603 -0.46625572  
C 1.17030573 5.88803482 1.47696698  
H 2.10866857 5.57666302 1.00483072  
H 0.98900044 6.93447018 1.22125125  
C 1.23353612 5.61955023 2.97282505  
H 0.43052009 6.14925337 3.49617934  
H 2.18626213 5.91000891 3.42007804  
C 1.00647116 4.12061071 3.04149270  
H 1.92313528 3.55114174 2.84904647  
H 0.59232539 3.76666903 3.98719645

C 2.34105563 -4.35351753 -0.34699833  
H 2.21023870 -5.26648617 0.23944202  
H 2.61346245 -3.55092192 0.34392852  
C 3.34078741 -4.50448036 -1.49378800  
C 2.70325804 -3.72129297 -2.64083290  
C 1.21118128 -4.01120996 -2.47343993  
H 3.07277989 -4.01696444 -3.62557364  
H 2.87016177 -2.64919114 -2.50031805  
H 3.47453070 -5.55546904 -1.76468837  
H 4.31839371 -4.10635185 -1.21455145  
H 0.60646713 -3.20939064 -2.90425920  
C 0.80420357 -5.35616684 -3.05960155  
La 0.47626337 -0.55125773 1.62303185  
N -1.57192898 -1.46850932 3.56003547  
O -0.33809239 -1.44872761 3.84836793  
O -1.87157178 -1.06429803 2.38406038  
O -2.41030478 -1.83893561 4.33140659  
N 3.09903312 -0.78225470 2.98476982  
O 2.38254905 0.26616374 3.06232381  
O 2.60714579 -1.72938621 2.28880644  
O 4.16494703 -0.87233996 3.52417183  
N 1.94499350 0.44758439 -0.83128721  
O 2.47014761 0.85246921 -1.83457887  
O 1.75487506 -0.79068345 -0.62467337  
O 1.54142022 1.23209488 0.08122860  
H 0.91289634 -5.33299637 -4.14768934  
H 1.43062556 -6.16259050 -2.67001486  
H -0.23434776 -5.60470104 -2.82637668  
H 0.50657701 5.42076492 -1.07514107  
H 1.13790178 3.85482931 -0.50719827  
H -0.57415044 4.03547668 -0.91166234

## Isomer VI

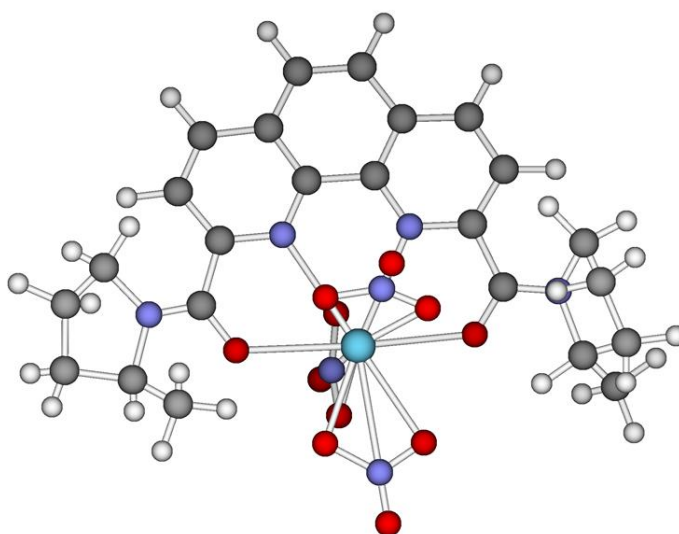

PBE/L1 theoretical level

E= -10635.459626

G= 264.0618 kcal/mol, H= 340.8097 kcal/mol, U= 340.2172 kcal/mol, S= 257.4137 cal/mol at T= 298.150 K

|   |             |             |             |
|---|-------------|-------------|-------------|
| H | -4.60975075 | 3.42492580  | -0.87970799 |
| H | -3.74720287 | -2.83993769 | -3.44441271 |
| N | -1.55314028 | 1.22242796  | 0.06020555  |
| N | -0.12734939 | 4.04511499  | 1.71326125  |
| N | -1.25327611 | -1.29113483 | -0.90187186 |
| N | 0.90055633  | -4.03788996 | -1.36439800 |
| O | -0.06364904 | 1.83495581  | 2.17856908  |
| O | 0.20414659  | -3.02605605 | 0.54887253  |
| C | -1.66844857 | 2.45665169  | 0.54961008  |
| C | -2.77269244 | 3.27927589  | 0.23654655  |
| H | -2.88616967 | 4.26094151  | 0.69405609  |
| C | -3.73842740 | 2.81105137  | -0.63562369 |
| C | -3.60462594 | 1.53013062  | -1.20919991 |
| C | -4.54329634 | 0.97557110  | -2.13817954 |
| H | -5.40536022 | 1.58011627  | -2.43331432 |
| C | -4.37250757 | -0.28093025 | -2.64732122 |
| H | -5.09528303 | -0.69417775 | -3.35626101 |

C -3.25399208 -1.08834147 -2.26146245  
C -3.03645325 -2.39863181 -2.74023795  
C -1.93684387 -3.11696267 -2.30571008  
H -1.75936222 -4.13699484 -2.65163851  
C -1.06303918 -2.52219844 -1.37280869  
C -2.30513406 -0.57389295 -1.33376276  
C -2.47478390 0.76506537 -0.80581385  
C -0.56262118 2.78270555 1.53964365  
C 0.07769487 -3.23038840 -0.67502838  
C -0.55381733 5.26984978 1.00591719  
H -1.53119171 5.61542606 1.38904798  
C 0.52603281 6.29428530 1.37427878  
H 1.38083529 6.21205378 0.68514496  
H 0.14003327 7.32306576 1.32612181  
C 0.92742914 5.85751009 2.79055738  
H 0.15707707 6.17012167 3.51572251  
H 1.89370608 6.27062988 3.11374855  
C 0.97705656 4.32295799 2.68863535  
C 2.33149981 3.79680037 2.20492768  
H 0.71417695 3.82970190 3.63838077  
C 2.10128427 -4.59236383 -0.65644091  
C 1.75240779 -5.79405403 0.21580201  
H 2.48875356 -3.78048968 -0.01503039  
C 3.07754517 -4.89558220 -1.80826187  
C 2.64073229 -3.95176196 -2.93660498  
C 1.11239374 -3.99535155 -2.82515478  
H 2.99358320 -4.26273584 -3.93114805  
H 2.98108864 -2.92299557 -2.73451352  
H 4.11956263 -4.73654604 -1.49368989  
H 0.62538463 -3.11282468 -3.26282001  
La 0.41533017 -0.50699419 1.21536040

N -1.61605883 -1.23770201 3.28515267  
O -0.35309747 -1.19921398 3.55219269  
O -1.94192529 -0.94038463 2.05469036  
O -2.45657706 -1.52791953 4.11555195  
N 3.06574512 -0.86606562 2.54737663  
O 2.47128916 0.29005885 2.46064186  
O 2.41550565 -1.86106932 2.03115129  
O 4.15456390 -0.99633616 3.07343531  
N 1.90059662 0.32292944 -1.30671906  
O 2.44898558 0.65012240 -2.34669232  
O 1.79654562 -0.92185664 -0.94843531  
O 1.38156521 1.18675566 -0.49646649  
H 0.70604682 -4.90748072 -3.30031061  
H 2.97018814 -5.94839573 -2.12479973  
H 2.66944957 -6.17382288 0.69415790  
H 1.31011307 -6.60595942 -0.38457435  
H 1.05213916 -5.50357914 1.01260829  
H -0.63658226 5.09269810 -0.07719749  
H 2.33129144 2.70219493 2.11505556  
H 3.09969473 4.06979322 2.94622636  
H 2.61062837 4.23313427 1.23296118

PBE0/L1 theoretical level

E=-10635.349594

H -4.58073092 3.39669490 -0.86101657  
H -3.69689703 -2.80963540 -3.43487048  
N -1.55361164 1.21113729 0.07513214  
N -0.13228488 4.00185490 1.70891786  
N -1.24734497 -1.28145957 -0.88759202  
N 0.90562904 -3.98581100 -1.35291135  
O -0.07433111 1.81387532 2.17124677  
O 0.21077564 -2.99027109 0.54125661

C -1.66925979 2.42880940 0.56413972  
C -2.76354599 3.24864602 0.25519410  
H -2.87643576 4.22082901 0.71267945  
C -3.71753287 2.78615236 -0.61605930  
C -3.57981181 1.51619840 -1.18916619  
C -4.50918579 0.96795082 -2.12326550  
H -5.36363602 1.56853855 -2.41800451  
C -4.33380413 -0.27249011 -2.63388371  
H -5.04485464 -0.68039310 -3.34506893  
C -3.21973658 -1.07590640 -2.24574065  
C -2.99811244 -2.37368226 -2.72801280  
C -1.90837646 -3.08652139 -2.29342985  
H -1.72544289 -4.09643078 -2.64018464  
C -1.05187166 -2.49543858 -1.35791624  
C -2.28901052 -0.56991976 -1.31827235  
C -2.46334720 0.75853717 -0.78779382  
C -0.56503880 2.75423002 1.54367328  
C 0.08773321 -3.19563007 -0.66761875  
C -0.54956043 5.21042156 0.99391824  
H -1.51276159 5.56876707 1.37575400  
C 0.53323448 6.22400904 1.34221387  
H 1.37730777 6.12805748 0.65433145  
H 0.15779528 7.24782944 1.28498006  
C 0.93706566 5.80161524 2.75096250  
H 0.17752661 6.12378788 3.47132730  
H 1.90156782 6.20719767 3.06208444  
C 0.97342581 4.27672815 2.66140699  
C 2.31046081 3.74613166 2.16773367  
H 0.72323596 3.79756379 3.61213541  
C 2.09557104 -4.53551960 -0.65349030  
C 1.74761569 -5.71851826 0.22727980



H 2.49641228 -3.72733116 -0.03075256  
C 3.05222535 -4.86053514 -1.80099964  
C 2.62762570 -3.91909909 -2.92158294  
C 1.10954285 -3.93818235 -2.80249739  
H 2.96804285 -4.23523664 -3.91010332  
H 2.98396373 -2.90343833 -2.72453427  
H 4.09213591 -4.72294426 -1.49710977  
H 0.64182138 -3.05117130 -3.23211050  
La 0.40285420 -0.51064080 1.23210454  
N -1.63873243 -1.22957003 3.26481080  
O -0.40204504 -1.20399296 3.53852820  
O -1.94504881 -0.93759012 2.05795312  
O -2.47506547 -1.50595212 4.07744598  
N 3.04557586 -0.85989523 2.53540969  
O 2.46615672 0.27326068 2.44773936  
O 2.40622330 -1.83771360 2.03769135  
O 4.12042141 -0.98750716 3.04893899  
N 1.86216915 0.31895891 -1.28013003  
O 2.39218974 0.64332628 -2.30906272  
O 1.76631665 -0.90139234 -0.93097210  
O 1.35762656 1.16469419 -0.48288935  
H 0.69052172 -4.83367729 -3.27852893  
H 2.92153192 -5.90428448 -2.11120105  
H 2.65999770 -6.10378170 0.69195265  
H 1.29121554 -6.52235889 -0.35926673  
H 1.06516457 -5.41774654 1.02487910  
H -0.63701725 5.02507114 -0.07925421  
H 2.30413365 2.65963674 2.07942295  
H 3.08384275 4.01457500 2.89353871  
H 2.57777786 4.17658329 1.19851041

## Isomer VII

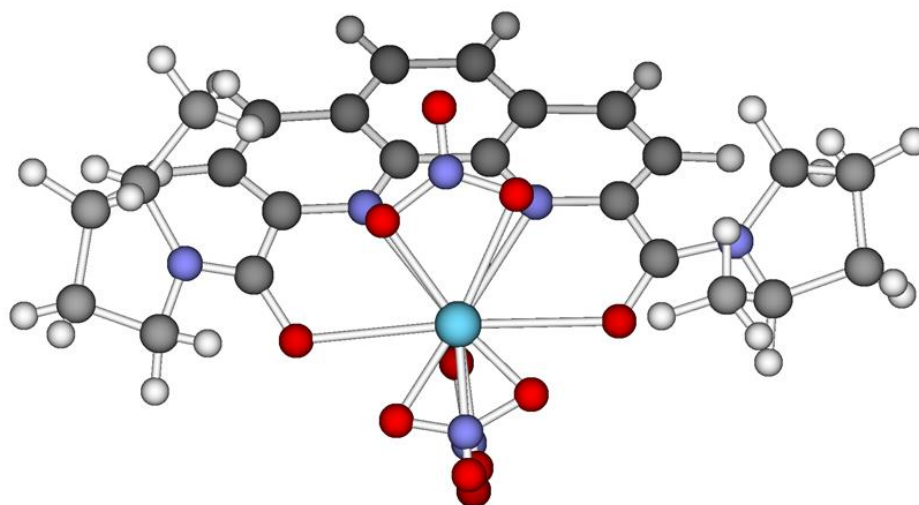

PBE/L1 theoretical level

E= -10635.455567

G= 264.1066 kcal/mol, H= 340.6949 kcal/mol, U= 340.1024 kcal/mol, S= 256.8782 cal/mol at T= 298.150 K

|   |             |             |             |
|---|-------------|-------------|-------------|
| N | -1.52543831 | 1.14852083  | 0.22032121  |
| N | -0.24159265 | 3.96432066  | 1.96291697  |
| N | -1.11107743 | -1.35040343 | -0.74850994 |
| N | 1.12208879  | -4.07947063 | -1.27253056 |
| O | -0.36893517 | 1.78504789  | 2.55832624  |
| O | 0.67370898  | -2.83482766 | 0.56111115  |
| C | -1.70158744 | 2.37319565  | 0.71214110  |
| C | -2.81332445 | 3.17111850  | 0.37213725  |
| H | -2.93802810 | 4.15946627  | 0.81787986  |
| C | -3.75272202 | 2.66586018  | -0.50731659 |
| C | -3.57977915 | 1.37621295  | -1.05475175 |
| C | -4.50923538 | 0.77522713  | -1.96356535 |
| H | -5.39232540 | 1.34707952  | -2.26174808 |
| C | -4.30695438 | -0.48740748 | -2.44460487 |
| H | -5.02617550 | -0.94008005 | -3.13275838 |
| C | -3.15791917 | -1.24929380 | -2.05727506 |
| C | -2.91337824 | -2.56607151 | -2.49758077 |

C -1.77219284 -3.22888446 -2.08500719  
H -1.59285927 -4.25331879 -2.40827370  
C -0.87313193 -2.57636499 -1.21361482  
C -2.20537615 -0.68676549 -1.16175640  
C -2.42383313 0.65138233 -0.64895743  
C -0.70323771 2.71398687 1.79410088  
C 0.37078637 -3.19128227 -0.59465235  
C -0.21410929 5.10199451 0.98974806  
H -1.18577242 5.63046265 1.03376436  
C 0.87742192 6.01499701 1.58933377  
H 1.85342455 5.72191381 1.16570461  
H 0.69488907 7.07047796 1.33761621  
C 0.85229248 5.72013092 3.09139299  
H 0.00525498 6.23378849 3.57674551  
H 1.77763021 6.01945353 3.60490656  
C 0.64616370 4.20692587 3.12499380  
C 2.35129428 -4.65550995 -0.63641649  
C 2.69708991 -5.80167818 -1.60354066  
C 2.28233051 -5.24590826 -2.97359133  
C 0.94986689 -4.55476189 -2.66057134  
H 2.16412354 -6.02161741 -3.74437547  
H 3.01832318 -4.51001358 -3.33293056  
H 2.10352540 -6.70000792 -1.36343157  
H 3.76294160 -6.06567621 -1.54850948  
La 0.48272747 -0.41458520 1.44188380  
N -1.48557663 -1.75027430 3.25793982  
O -0.23108444 -1.67094553 3.55216932  
O -1.83484685 -1.20191908 2.12362671  
O -2.29874015 -2.29762292 3.97891259  
N 3.05698800 -0.44736558 2.95153475  
O 2.14717364 0.44881970 3.16497731

O 2.75778103 -1.33731818 2.04691482  
O 4.11752319 -0.46193704 3.54676032  
N 1.88828373 0.98912764 -0.85792363  
O 2.37402391 1.57580578 -1.81223190  
O 1.66627359 -0.28420162 -0.86768657  
O 1.55317318 1.61241400 0.23133363  
H 0.13212891 -5.29608870 -2.71593761  
C 0.11066614 4.69804621 -0.44932726  
H -4.63714361 3.24854660 -0.77864408  
H -3.63310313 -3.05818057 -3.15748239  
H 0.16938637 3.82864428 4.04107523  
H 2.06867242 -5.02077723 0.36430031  
C 3.47711635 -3.62699890 -0.49817619  
H 0.34876060 5.60672522 -1.02505445  
H -0.72697943 4.19587040 -0.95363081  
H 0.97871256 4.01929712 -0.46922415  
H 1.58971620 3.64847255 2.98954606  
H 3.19702053 -2.80922318 0.17937513  
H 3.75634789 -3.19971085 -1.47413099  
H 4.35962772 -4.12770939 -0.06830434  
H 0.72120041 -3.71913099 -3.33946609

PBE0/L1 theoretical level

E= -10635.345265

N -1.51994860 1.13643503 0.22563136  
N -0.21620582 3.91508985 1.93506300  
N -1.11378658 -1.34748268 -0.73280430  
N 1.10941792 -4.03881598 -1.25134015  
O -0.36997882 1.76410758 2.53904843  
O 0.65799689 -2.81127548 0.56506747  
C -1.69178128 2.34696937 0.71306437  
C -2.79148102 3.14476323 0.37711030

H -2.91300178 4.12415457 0.82310361  
C -3.72123790 2.64684534 -0.50003010  
C -3.54927468 1.36612463 -1.04412138  
C -4.47451496 0.77078307 -1.95288503  
H -5.34765053 1.34154665 -2.25222063  
C -4.27682257 -0.48050436 -2.42699289  
H -4.98903656 -0.92870468 -3.11222696  
C -3.13559818 -1.24194551 -2.03497648  
C -2.89572811 -2.55087161 -2.47010994  
C -1.76664901 -3.21124411 -2.05593586  
H -1.58869958 -4.22846985 -2.37385058  
C -0.87821412 -2.56048203 -1.18891132  
C -2.19524479 -0.68665594 -1.14617229  
C -2.40949893 0.64531887 -0.63876826  
C -0.69215631 2.68475270 1.78399456  
C 0.36347657 -3.16703916 -0.57736379  
C -0.20351930 5.03907681 0.96880370  
H -1.16858530 5.56084156 1.01550186  
C 0.88012367 5.95418549 1.55217481  
H 1.84702837 5.67026711 1.12225103  
H 0.68852377 7.00091982 1.30521083  
C 0.87367660 5.65957975 3.04433846  
H 0.03326019 6.16207790 3.53496337  
H 1.79560745 5.96281385 3.54460597  
C 0.67875141 4.15476894 3.07610297  
C 2.33620214 -4.59695578 -0.62811130  
C 2.69176006 -5.72551203 -1.59499574  
C 2.27166057 -5.16785669 -2.95100331  
C 0.94048375 -4.49922609 -2.63172984  
H 2.16163039 -5.93335915 -3.72194862  
H 2.99334145 -4.42615795 -3.30294132

H 2.11076951 -6.62455797 -1.36296141  
H 3.75262499 -5.97737122 -1.54304135  
La 0.46323460 -0.42529601 1.46014380  
N -1.52338946 -1.76296651 3.22017574  
O -0.29707047 -1.69319999 3.52825975  
O -1.84964073 -1.20689857 2.11543417  
O -2.33357072 -2.31390166 3.91069818  
N 3.02694273 -0.43975404 2.94699192  
O 2.11664343 0.41132414 3.18526793  
O 2.75466228 -1.29083538 2.03517270  
O 4.07299614 -0.44677562 3.53109169  
N 1.86060524 0.97545010 -0.81789935  
O 2.34339094 1.55864084 -1.75225782  
O 1.62674582 -0.26882476 -0.84366745  
O 1.54285443 1.57910013 0.25647777  
H 0.14034371 -5.24625587 -2.69208527  
C 0.11629130 4.63773680 -0.46189347  
H -4.59610271 3.23047757 -0.76847988  
H -3.60850739 -3.03857994 -3.12735605  
H 0.22088869 3.77542925 3.99132538  
H 2.06806111 -4.96842813 0.36500481  
C 3.44316888 -3.56266379 -0.49588475  
H 0.33330566 5.54242659 -1.03756940  
H -0.70853508 4.12229729 -0.95699215  
H 0.99110001 3.98136401 -0.48371875  
H 1.61715782 3.60871577 2.92530298  
H 3.15749764 -2.75103426 0.17332134  
H 3.71239543 -3.13915110 -1.46758652  
H 4.32664585 -4.04746389 -0.06989642  
H 0.70416379 -3.66786671 -3.29997396

## Isomer VIII

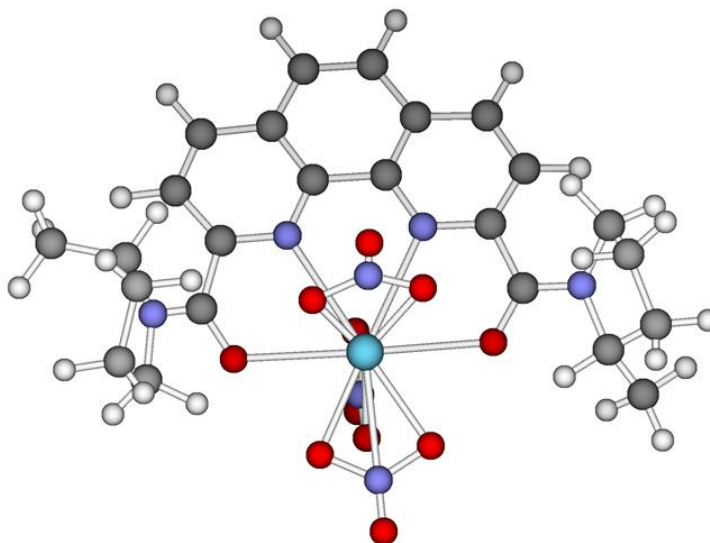

PBE/L1 theoretical level

E= -10635.459331

G= 263.5031 kcal/mol, H= 340.8417 kcal/mol, U= 340.2492 kcal/mol, S= 259.3948 cal/mol at T= 298.150 K

|    |             |             |             |
|----|-------------|-------------|-------------|
| N  | -1.61653864 | 1.09944475  | 0.18705942  |
| N  | -0.20395324 | 3.84218860  | 1.85224628  |
| N  | -1.14963889 | -1.36029112 | -0.79625589 |
| N  | 1.18891776  | -3.96145153 | -1.26414514 |
| O  | -0.51574028 | 1.70876813  | 2.55768132  |
| O  | 0.44943237  | -2.96675730 | 0.63703656  |
| 7C | -1.79437196 | 2.32481003  | 0.67642695  |
| C  | -2.87608171 | 3.13938284  | 0.28156129  |
| H  | -3.01452613 | 4.12466574  | 0.72836852  |
| C  | -3.77391815 | 2.65489125  | -0.65397793 |
| C  | -3.58537841 | 1.37112117  | -1.21057677 |
| C  | -4.45023632 | 0.78951085  | -2.19418359 |
| H  | -5.31165886 | 1.36776555  | -2.53975224 |
| C  | -4.21075773 | -0.45951566 | -2.69699359 |
| H  | -4.87842083 | -0.88929367 | -3.44886875 |
| C  | -3.08675218 | -1.23208916 | -2.25732327 |
| C  | -2.78112268 | -2.52423143 | -2.73833370 |

C -1.66283989 -3.18855071 -2.26512551  
H -1.41690230 -4.19088793 -2.62041259  
C -0.86132944 -2.56275535 -1.28696871  
C -2.21445608 -0.69307464 -1.27202570  
C -2.46637559 0.62969720 -0.74203259  
C -0.79219043 2.63538575 1.76949346  
C 0.32067052 -3.19289160 -0.58259887  
C -0.14478569 4.86538982 0.77734274  
C -0.93830913 6.12689972 1.13470328  
C 1.37244630 5.11352015 0.68675065  
H 1.83177638 4.27962589 0.13115239  
H 1.60933340 6.06091404 0.17959274  
C 1.82344949 5.07763910 2.15759897  
H 1.65258110 6.04986525 2.64637804  
H 2.89156675 4.83529902 2.25803471  
C 0.94803756 3.97892594 2.78571057  
C 2.41233110 -4.45255470 -0.54841572  
C 3.39242649 -4.75350380 -1.69738877  
C 2.91885924 -3.85655260 -2.84858346  
C 1.39319623 -3.94546175 -2.72628927  
H 3.27535582 -4.18515015 -3.83621216  
H 3.23362279 -2.81330466 -2.68145180  
H 3.31730175 -5.81703186 -1.98567355  
H 4.43092585 -4.55380535 -1.39486265  
La 0.32638082 -0.51062894 1.47453094  
N -1.75095987 -1.70298398 3.25583863  
O -0.51251805 -1.61408973 3.61370349  
O -2.02858520 -1.23481834 2.06727242  
O -2.60919428 -2.18813705 3.96763921  
N 2.87509823 -0.61727703 3.02686024  
O 2.05081081 0.38425925 3.10992432



O 2.50336194 -1.57574749 2.23155975  
O 3.92147708 -0.65291154 3.64553428  
N 1.90386808 0.76553696 -0.80310780  
O 2.49400783 1.28231645 -1.73851943  
O 1.73244762 -0.51489919 -0.71823913  
O 1.40515709 1.46841300 0.16667609  
H 1.01716340 -4.88173294 -3.17897582  
H -4.63199615 3.25764465 -0.96406013  
H -3.43319726 -2.99243689 -3.48089242  
H 0.59188038 4.22532654 3.79839826  
C 2.11372662 -5.64274549 0.35794494  
H 1.45939982 3.00412107 2.84127212  
H 0.87440526 -3.09094214 -3.18223619  
H -0.52953595 4.42185974 -0.15407695  
H -0.53808373 6.60851860 2.03988266  
H -2.00083733 5.90527582 1.31846488  
H -0.87829548 6.84924126 0.30515000  
H 1.40651572 -5.35864735 1.15059114  
H 3.04710841 -5.97428989 0.84042633  
H 1.70045948 -6.48612928 -0.21912079  
H 2.77398920 -3.61065149 0.06887393

PBE0/L1 theoretical level

E=-10635.349594

N -1.61303961 1.08422220 0.19190085  
N -0.19211628 3.79710460 1.83216476  
N -1.15161157 -1.35904944 -0.78357482  
N 1.18353891 -3.91335344 -1.24354410  
O -0.49633521 1.68354368 2.52220082  
O 0.42973459 -2.94818664 0.63918984  
C -1.78242409 2.29724050 0.67344856  
C -2.84732509 3.11507201 0.27630463

H -2.98015070 4.09426022 0.71715444  
C -3.73552489 2.63794732 -0.65640688  
C -3.55166769 1.36102128 -1.20558739  
C -4.41027164 0.78610718 -2.19110799  
H -5.26061678 1.36380267 -2.53892446  
C -4.17446661 -0.45115092 -2.68789458  
H -4.83363342 -0.87563533 -3.43829155  
C -3.05956912 -1.22406304 -2.24238610  
C -2.75611925 -2.50698566 -2.72124267  
C -1.65081370 -3.16910648 -2.24570417  
H -1.40306330 -4.16322184 -2.59761524  
C -0.86376393 -2.54709458 -1.26834941  
C -2.20286679 -0.69411314 -1.26035917  
C -2.45217514 0.62154204 -0.73393244  
C -0.77614725 2.60530448 1.75275028  
C 0.31355056 -3.17023802 -0.56739223  
C -0.15123530 4.81921959 0.77495408  
C -0.93434620 6.06839514 1.15431690  
C 1.35222948 5.07644701 0.66594374  
H 1.80786896 4.25936747 0.09859999  
H 1.57351983 6.02513218 0.17127675  
C 1.81987512 5.02751112 2.12012196  
H 1.65359724 5.98727131 2.61710238  
H 2.88209534 4.78934145 2.20467520  
C 0.96141225 3.92713237 2.74464202  
C 2.39566731 -4.39569187 -0.53277624  
C 3.36786914 -4.69888830 -1.67328405  
C 2.90239263 -3.80112672 -2.81313872  
C 1.38651586 -3.88519740 -2.69341779  
H 3.25720406 -4.12239504 -3.79492807  
H 3.21737337 -2.76736474 -2.63967204

H 3.28379703 -5.75304937 -1.96319818  
H 4.40044403 -4.50981474 -1.37240815  
La 0.31529498 -0.52466363 1.48092771  
N -1.76989043 -1.68302202 3.23937321  
O -0.55785209 -1.59965718 3.60125518  
O -2.03022718 -1.23294461 2.07092166  
O -2.62214327 -2.15166521 3.93852305  
N 2.87118053 -0.62682974 2.98326230  
O 2.07654428 0.36524355 3.05891991  
O 2.48671985 -1.57752240 2.22899103  
O 3.91111612 -0.66077566 3.57707977  
N 1.85853779 0.72669929 -0.80638641  
O 2.42299271 1.22866166 -1.74190068  
O 1.70741069 -0.52906984 -0.70505553  
O 1.37164927 1.42448354 0.13734557  
H 1.01082373 -4.80828953 -3.15245795  
H -4.58145475 3.24145722 -0.96978205  
H -3.39856768 -2.96938229 -3.46382356  
H 0.62142229 4.16205740 3.75648618  
C 2.10149145 -5.57820320 0.36835754  
H 1.47682476 2.96351647 2.78268003  
H 0.87843013 -3.03010297 -3.14120102  
H -0.54269636 4.39064837 -0.15086778  
H -0.51836979 6.53796816 2.04933929  
H -1.98509455 5.84776497 1.35885584  
H -0.89117825 6.79339981 0.33650830  
H 1.40570652 -5.29618645 1.16099691  
H 3.03051925 -5.91368675 0.83853930  
H 1.68266773 -6.41135311 -0.20507649  
H 2.75874019 -3.55980492 0.07657798

**L3\*Nd(NO<sub>3</sub>)<sub>3</sub> (Meso)**

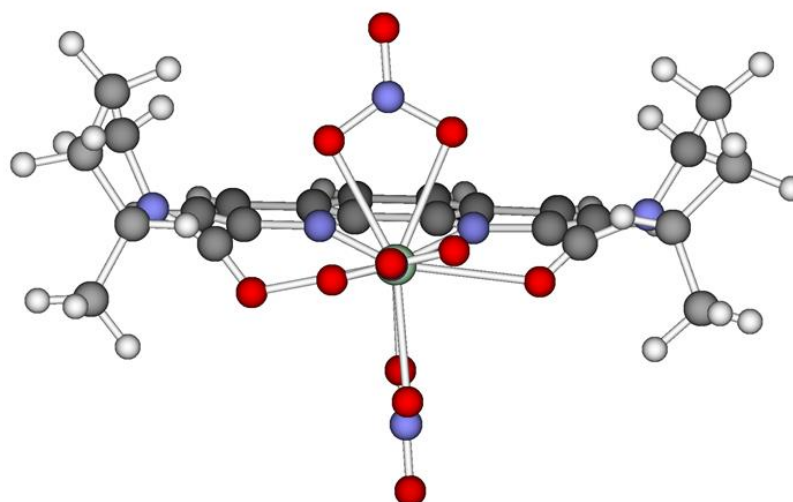

PBE/L1 theoretical level

E= -11766.855900

G= 264.0723 kcal/mol, H= 340.7561 kcal/mol, U= 340.1636 kcal/mol, S= 257.1989 cal/mol at T= 298.150 K

|   |             |             |             |
|---|-------------|-------------|-------------|
| N | -1.58338439 | 1.21862650  | 0.04854217  |
| N | -0.20141669 | 3.96346784  | 1.77016890  |
| N | -1.18472338 | -1.24086237 | -0.93707585 |
| N | 1.04003239  | -3.96734071 | -1.45969784 |
| O | -0.40968055 | 1.78396976  | 2.37951994  |
| O | 0.56689137  | -2.73173261 | 0.38010094  |
| C | -1.73910403 | 2.44219112  | 0.55134076  |
| C | -2.82036495 | 3.27305818  | 0.19235241  |
| H | -2.92710590 | 4.26080894  | 0.64453882  |
| C | -3.75712085 | 2.80002809  | -0.71101052 |
| C | -3.60691166 | 1.51077414  | -1.26676917 |
| C | -4.52153540 | 0.93128198  | -2.20565605 |
| H | -5.38863611 | 1.51856315  | -2.52038670 |
| C | -4.32390451 | -0.32819960 | -2.70124483 |
| H | -5.03176498 | -0.75748801 | -3.41571832 |
| C | -3.19339085 | -1.11297345 | -2.30203128 |
| C | -2.93416309 | -2.42073369 | -2.76681733 |

C -1.80149055 -3.09053850 -2.33714271  
H -1.59623563 -4.10641098 -2.67789626  
C -0.93369687 -2.45439243 -1.42340553  
C -2.26589775 -0.57106048 -1.37067664  
C -2.47735929 0.75737715 -0.84437370  
C -0.72590482 2.73308015 1.63527977  
C 0.28903139 -3.07280374 -0.78579026  
C -0.16490267 5.00028276 0.72024781  
H -0.83443063 5.84030628 0.98291475  
C 1.30306149 5.44198608 0.74167728  
H 1.90714443 4.69946146 0.19489077  
H 1.44602871 6.43208218 0.28376287  
C 1.63365436 5.40617132 2.23982739  
H 1.23772907 6.30720377 2.74115872  
H 2.71367502 5.34955263 2.44045234  
C 0.90673560 4.15336323 2.76299763  
C 0.38745376 4.27011299 4.19267941  
C 2.28521585 -4.48140955 -0.80187166  
C 1.98572648 -5.52012920 0.27521539  
C 3.11149573 -5.01452017 -1.98626721  
C 2.60828972 -4.21377182 -3.19374704  
C 1.10095096 -4.12645197 -2.92598295  
H 2.83004618 -4.69021034 -4.16037560  
H 3.03772497 -3.19850111 -3.19062233  
H 2.90705347 -6.09010220 -2.13075471  
H 4.18957663 -4.89289856 -1.80604124  
Nd 0.39027581 -0.31915566 1.13822198  
N -1.43629241 -1.61334682 3.00256658  
O -0.16762102 -1.49677622 3.22709870  
O -1.84395790 -1.11117184 1.87219703  
O -2.19668818 -2.15123343 3.78359056

|   |             |             |             |
|---|-------------|-------------|-------------|
| N | 2.98352122  | -0.31665757 | 2.47167587  |
| O | 2.06005049  | 0.54574573  | 2.75531483  |
| O | 2.65549564  | -1.18659866 | 1.56193304  |
| O | 4.07372761  | -0.31478170 | 3.00957799  |
| N | 1.77323413  | 1.01120877  | -1.12515223 |
| O | 2.33042288  | 1.57779443  | -2.05015182 |
| O | 1.47747636  | -0.24458034 | -1.15410352 |
| O | 1.42989028  | 1.63868284  | -0.03899303 |
| H | 0.59500653  | -5.05898476 | -3.23828888 |
| H | 0.62525910  | -3.27375960 | -3.42996264 |
| H | -0.47375655 | 4.58289289  | -0.24823157 |
| H | 2.93384957  | -5.88405704 | 0.70236993  |
| H | 1.44042015  | -6.37984180 | -0.14719982 |
| H | 1.39522290  | -5.07590914 | 1.08919847  |
| H | -0.11776112 | 3.34176993  | 4.49652576  |
| H | -0.30904216 | 5.11848259  | 4.29418135  |
| H | 1.23674309  | 4.43264008  | 4.87548876  |
| H | 1.55174637  | 3.25971627  | 2.68561530  |
| H | 2.77781105  | -3.60935807 | -0.33516786 |
| H | -4.61748743 | 3.41289520  | -0.99358672 |
| H | -3.63193989 | -2.89683485 | -3.46103048 |

**L3\*Eu(NO<sub>3</sub>)<sub>3</sub>(Meso)**

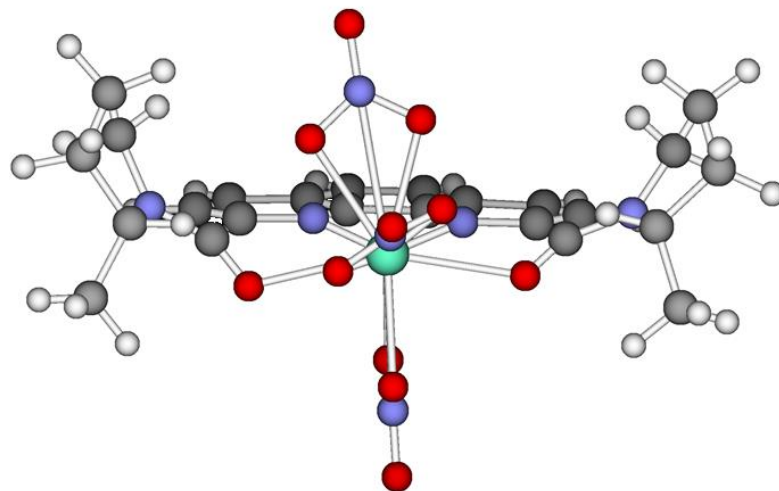

PBE/L1 theoretical level

E= -12987.853791

G= 264.8589 kcal/mol, H= 340.6332 kcal/mol, U= 340.0407 kcal/mol, S= 254.1483 cal/mol at T= 298.150 K

|   |             |             |             |
|---|-------------|-------------|-------------|
| N | -1.54530501 | 1.22288978  | 0.01235692  |
| N | -0.22671875 | 3.95122385  | 1.82265162  |
| N | -1.16499746 | -1.25603747 | -0.95030785 |
| N | 1.03220212  | -4.01877737 | -1.41410971 |
| O | -0.39743641 | 1.74781418  | 2.36789346  |
| O | 0.57837981  | -2.72153473 | 0.38940278  |
| C | -1.71544063 | 2.43342495  | 0.54027927  |
| C | -2.80397034 | 3.25876427  | 0.18768373  |
| H | -2.92580271 | 4.23644829  | 0.65771848  |
| C | -3.72589874 | 2.79491568  | -0.73496765 |
| C | -3.56494451 | 1.51316929  | -1.30613863 |
| C | -4.47250795 | 0.93797266  | -2.25459957 |
| H | -5.33712578 | 1.52678585  | -2.57341790 |
| C | -4.27405500 | -0.32082412 | -2.75155234 |
| H | -4.97784376 | -0.74722832 | -3.47170472 |
| C | -3.15201449 | -1.11119044 | -2.33962202 |
| C | -2.90306973 | -2.42604280 | -2.79009652 |
| C | -1.78530514 | -3.10807109 | -2.34172583 |
| H | -1.59219277 | -4.12985802 | -2.67126656 |
| C | -0.92049456 | -2.47554302 | -1.42216563 |
| C | -2.22862840 | -0.57169765 | -1.40276730 |
| C | -2.43500447 | 0.76145107  | -0.88361341 |
| C | -0.71825612 | 2.71008039  | 1.64624405  |
| C | 0.29420757  | -3.09433961 | -0.76554638 |
| C | -0.17127328 | 4.99759722  | 0.78197938  |
| H | -0.84729415 | 5.83426666  | 1.03880799  |
| C | 1.29541981  | 5.44099283  | 0.83221179  |
| H | 1.90804887  | 4.70268774  | 0.28957385  |

H 1.44433498 6.43562508 0.38600680  
C 1.59915972 5.39223289 2.33553028  
H 1.19024432 6.28618813 2.83939528  
H 2.67564583 5.33734941 2.55491972  
C 0.86829859 4.13054800 2.83055472  
C 0.33027360 4.22230864 4.25512981  
C 2.26743722 -4.53768063 -0.74071503  
C 1.94697523 -5.53088522 0.37276044  
C 3.07718945 -5.13315678 -1.90637004  
C 2.59325051 -4.36196899 -3.14032817  
C 1.08900726 -4.22634649 -2.87497711  
H 2.80045414 -4.87775373 -4.08983517  
H 3.05069399 -3.35955453 -3.17427397  
H 2.84366655 -6.20710850 -2.01278400  
H 4.15851831 -5.03542233 -1.73155189  
Eu 0.39535463 -0.29785982 1.03077829  
N -1.39629388 -1.52928364 2.96400118  
O -0.12845263 -1.37986791 3.16220784  
O -1.84092677 -1.05907393 1.84269404  
O -2.12408686 -2.07448959 3.77517438  
N 3.12358046 -0.27755356 2.04343414  
O 2.16456866 0.33317879 2.64729023  
O 2.78151417 -0.91287446 0.96512973  
O 4.27303314 -0.26296905 2.44891119  
N 1.64197505 1.34701741 -1.09244287  
O 2.16019249 2.00845361 -1.97973263  
O 1.20670068 0.14658076 -1.29634237  
O 1.47948682 1.80317605 0.10483665  
H 0.55980611 -5.15560102 -3.15689468  
H 0.63460964 -3.37898397 -3.40683007  
H -0.46065593 4.58846855 -0.19602460



H 2.88772511 -5.90228891 0.80978352  
 H 1.38095593 -6.39189196 -0.01846838  
 H 1.36883223 -5.04586792 1.17215943  
 H -0.17805423 3.28832221 4.53602076  
 H -0.36975524 5.06731415 4.36055708  
 H 1.16897750 4.37521362 4.95315313  
 H 1.51784170 3.24107718 2.74511361  
 H 2.78268623 -3.66100144 -0.30842978  
 H -4.58763599 3.40677214 -1.01569963  
 H -3.59980798 -2.89968133 -3.48704386

**L3\*Lu(NO<sub>3</sub>)<sub>3</sub>(Meso)**

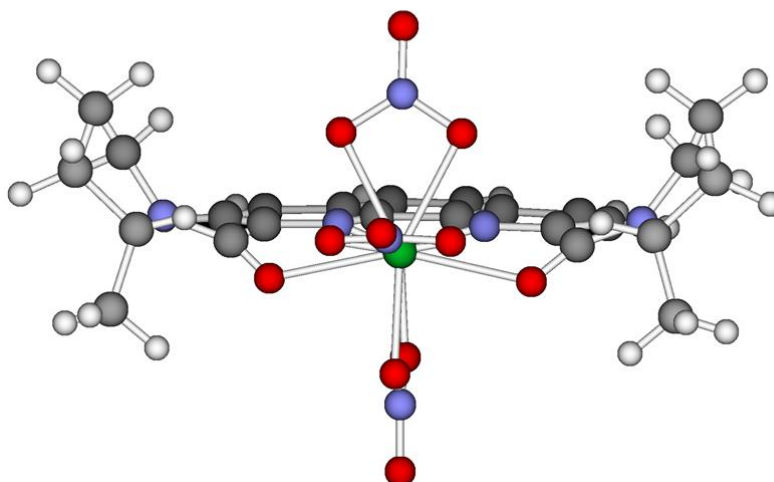

PBE/L1 theoretical level

E= -16710.257714

G= 267.7178 kcal/mol, H= 340.7519 kcal/mol, U= 340.1595 kcal/mol, S= 244.9576 cal/mol at T= 298.150 K

N -1.52900803 1.23280442 -0.06202852  
 N -0.20515759 3.94277668 1.81466091  
 N -1.16152298 -1.20228744 -1.03566515  
 N 0.99819416 -4.00261450 -1.36763263  
 O -0.17026410 1.69748259 2.11715984  
 O 0.49261481 -2.64562798 0.37488514  
 C -1.67259789 2.44327378 0.46987668

C -2.77012420 3.27361488 0.15476784  
H -2.88347054 4.24742222 0.63400376  
C -3.72087097 2.82036471 -0.74513108  
C -3.57590985 1.54615319 -1.33599257  
C -4.50005102 0.97121084 -2.26940656  
H -5.37199736 1.55847442 -2.57060242  
C -4.31062460 -0.28798237 -2.77191496  
H -5.03045750 -0.71292061 -3.47700667  
C -3.18062234 -1.08095586 -2.38450956  
C -2.93603539 -2.39927959 -2.82722473  
C -1.81463695 -3.07831955 -2.37935781  
H -1.62818897 -4.10607195 -2.69467044  
C -0.93667060 -2.43546844 -1.47993696  
C -2.23864818 -0.53528631 -1.47213387  
C -2.43862629 0.79204464 -0.94192952  
C -0.62033677 2.69668579 1.52371001  
C 0.25087696 -3.05181599 -0.77825749  
C -0.31964454 5.12247801 0.93582922  
H -1.08048081 5.82466030 1.32465780  
C 1.08143020 5.74064541 1.01839948  
H 1.76134014 5.18766022 0.34993717  
H 1.08317935 6.80227327 0.72946024  
C 1.46102035 5.50429678 2.48586416  
H 0.97026581 6.25333405 3.13221812  
H 2.54494715 5.55651188 2.66397476  
C 0.91266179 4.10117483 2.80279231  
C 0.44249636 3.91840100 4.24282598  
C 2.21921158 -4.48945045 -0.64435327  
C 1.87612462 -5.45565987 0.48559606  
C 3.06919098 -5.10448408 -1.77096641  
C 2.60607505 -4.37720442 -3.03980279

C 1.09333181 -4.25635672 -2.81799197  
H 2.84652948 -4.91664314 -3.96810126  
H 3.04680562 -3.36812115 -3.08905864  
H 2.85809135 -6.18543959 -1.85237122  
H 4.14338589 -4.97994328 -1.57108951  
Lu 0.48461962 -0.28044760 0.88542473  
N -1.05808425 -1.34096527 2.93731570  
O 0.22144499 -1.18224084 3.02583790  
O -1.56913984 -0.95964777 1.79867995  
O -1.73550892 -1.80454826 3.83207536  
N 3.08592796 -0.31610638 1.96479499  
O 2.28230381 0.69326627 2.09227920  
O 2.59005594 -1.30018198 1.28106022  
O 4.20395756 -0.33809385 2.44259739  
N 1.68020463 0.83582175 -1.43820274  
O 2.16759920 1.31581819 -2.44571209  
O 1.54619908 -0.44110733 -1.26389337  
O 1.24947572 1.56061232 -0.45398054  
H 0.58283204 -5.20122004 -3.08203769  
H 0.64263785 -3.43145728 -3.38702965  
H -0.59466821 4.82132578 -0.08451932  
H 2.80785894 -5.80818462 0.95603806  
H 1.32450938 -6.33062029 0.10449168  
H 1.27740204 -4.95066690 1.25709534  
H 0.07239864 2.89536071 4.40132523  
H -0.35086283 4.64092970 4.49502039  
H 1.29237580 4.08102560 4.92472124  
H 1.65558624 3.31864405 2.56417346  
H 2.70841122 -3.59505057 -0.21781346  
H -4.58934689 3.43715882 -0.99209863  
H -3.64001536 -2.88123441 -3.51112700

**L3\*Am(NO<sub>3</sub>)<sub>3</sub>(Meso)**

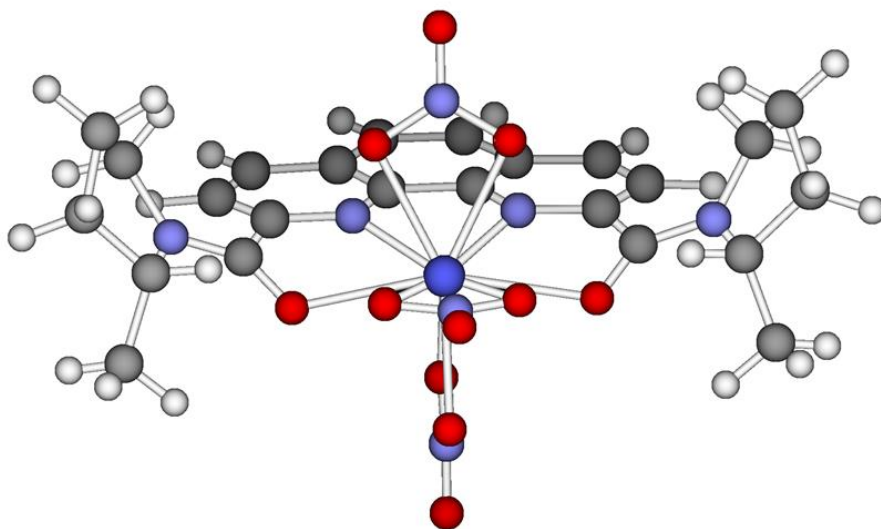

PBE/L1 theoretical level

E= -32560.361975

G= 265.2212 kcal/mol, H= 339.8748 kcal/mol, U= 339.2823 kcal/mol, S= 250.3893 cal/mol at T= 298.150 K

|   |             |             |             |
|---|-------------|-------------|-------------|
| N | -1.50517559 | 1.23180234  | -0.01343706 |
| N | -0.21432635 | 4.01528168  | 1.79458916  |
| N | -1.13221514 | -1.22579300 | -0.99850303 |
| N | 1.00664461  | -4.04042864 | -1.43326199 |
| O | -0.16198023 | 1.77996254  | 2.18456388  |
| O | 0.52673113  | -2.74678850 | 0.36872768  |
| C | -1.65786946 | 2.45666456  | 0.50315952  |
| C | -2.75598812 | 3.27716589  | 0.17419483  |
| H | -2.87010932 | 4.25460005  | 0.64521313  |
| C | -3.70367169 | 2.81234217  | -0.72106493 |
| C | -3.55327201 | 1.53136384  | -1.29721463 |
| C | -4.47662449 | 0.95928711  | -2.22819042 |
| H | -5.34805918 | 1.54791129  | -2.52783298 |
| C | -4.28586960 | -0.29985526 | -2.73241162 |
| H | -5.00355434 | -0.72645986 | -3.43852878 |
| C | -3.15631819 | -1.08833683 | -2.34642577 |
| C | -2.91393661 | -2.40094805 | -2.80877209 |

C -1.79196262 -3.08486509 -2.37396646  
H -1.60334039 -4.10763884 -2.70348763  
C -0.91225886 -2.45980406 -1.46691978  
C -2.21524405 -0.54808378 -1.42619169  
C -2.41612792 0.77649891 -0.89547420  
C -0.62003750 2.75338912 1.54853106  
C 0.26921448 -3.10601902 -0.80026847  
C -0.31503901 5.15418291 0.86156106  
H -1.09113812 5.86679697 1.19791901  
C 1.07790875 5.78899431 0.95207244  
H 1.78000104 5.21495819 0.32544798  
H 1.07838440 6.83728743 0.61794251  
C 1.42092669 5.61934280 2.43752551  
H 0.90343434 6.38792419 3.03846598  
H 2.49879384 5.69313955 2.64304924  
C 0.87954628 4.22397995 2.79767418  
C 0.38184384 4.09207010 4.23414087  
C 2.21528482 -4.58231211 -0.73186117  
C 1.85191131 -5.58928680 0.35557276  
C 3.05446172 -5.16465855 -1.88359201  
C 2.61452484 -4.36585999 -3.11700749  
C 1.10407710 -4.22278309 -2.89449477  
H 2.84789109 -4.86442709 -4.06965971  
H 3.07839227 -3.36588979 -3.11525869  
H 2.81510162 -6.23449230 -2.01702476  
H 4.13074923 -5.07858133 -1.67460907  
Am 0.44856462 -0.30668056 0.93636358  
N -1.21221805 -1.41175592 3.06263375  
O 0.06633497 -1.26747751 3.18728065  
O -1.70321798 -1.02643728 1.91593301  
O -1.91447997 -1.87128699 3.94220352

|   |             |             |             |
|---|-------------|-------------|-------------|
| N | 3.08378959  | -0.40358686 | 2.17799711  |
| O | 2.30042315  | 0.62494683  | 2.26786184  |
| O | 2.60407257  | -1.37541389 | 1.46739066  |
| O | 4.17353249  | -0.45208767 | 2.71260858  |
| N | 1.85561514  | 0.83815408  | -1.38521492 |
| O | 2.40147161  | 1.31389952  | -2.36476254 |
| O | 1.69416976  | -0.43887201 | -1.22866261 |
| O | 1.38782239  | 1.57108414  | -0.42323652 |
| H | 0.57492143  | -5.14180326 | -3.20863700 |
| H | 0.67224479  | -3.36102915 | -3.42239237 |
| H | -0.56244522 | 4.80515623  | -0.15075457 |
| H | 2.77520919  | -5.97951746 | 0.81273609  |
| H | 1.28539550  | -6.43626070 | -0.06470953 |
| H | 1.25880086  | -5.10809088 | 1.14639604  |
| H | 0.01538830  | 3.07322788  | 4.42497969  |
| H | -0.42259264 | 4.81666994  | 4.44095039  |
| H | 1.21539712  | 4.28891373  | 4.92711878  |
| H | 1.63796711  | 3.44369960  | 2.60574245  |
| H | 2.72550011  | -3.71900892 | -0.26788452 |
| H | -4.57322407 | 3.42280936  | -0.97850710 |
| H | -3.62014818 | -2.87088609 | -3.49832582 |

**L3\*Cm(NO<sub>3</sub>)<sub>3</sub>(Meso)**

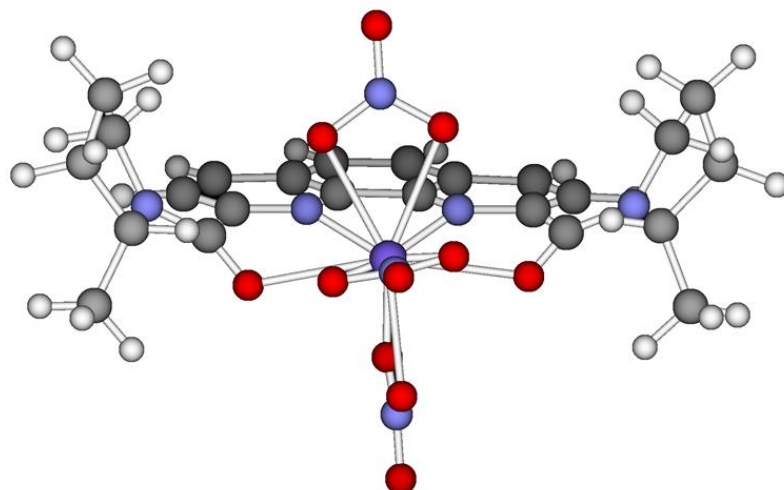

PBE/L1 theoretical level

E= -33396.683543

G= 263.9354 kcal/mol, H= 340.8541 kcal/mol, U= 340.2616 kcal/mol, S= 257.9866 cal/mol at T= 298.150 K

|   |             |             |             |
|---|-------------|-------------|-------------|
| N | -1.58312285 | 1.22081554  | 0.01465227  |
| N | -0.20209092 | 3.95349169  | 1.76634324  |
| N | -1.20225906 | -1.23916781 | -0.96173429 |
| N | 1.02319050  | -3.96209240 | -1.43747020 |
| O | -0.37699977 | 1.75802755  | 2.32258344  |
| O | 0.50683773  | -2.73348522 | 0.39555559  |
| C | -1.73470569 | 2.44094396  | 0.52613705  |
| C | -2.81822228 | 3.27349162  | 0.17607743  |
| H | -2.92609429 | 4.25757647  | 0.63607883  |
| C | -3.75570297 | 2.80827212  | -0.73057926 |
| C | -3.60895205 | 1.52162302  | -1.29441833 |
| C | -4.52502823 | 0.94507587  | -2.23406053 |
| H | -5.39157629 | 1.53405440  | -2.54724503 |
| C | -4.33217669 | -0.31522658 | -2.73079658 |
| H | -5.04342794 | -0.74128789 | -3.44385958 |
| C | -3.20571661 | -1.10560203 | -2.33059645 |
| C | -2.95212674 | -2.41760564 | -2.78776932 |
| C | -1.82718861 | -3.09456396 | -2.34799790 |
| H | -1.62825096 | -4.11435652 | -2.68155313 |
| C | -0.95926744 | -2.45883727 | -1.43390763 |
| C | -2.27659774 | -0.56544244 | -1.40052676 |
| C | -2.48084188 | 0.76532710  | -0.87525970 |
| C | -0.71329987 | 2.72144318  | 1.60395372  |
| C | 0.25413412  | -3.07578754 | -0.77718318 |
| C | -0.18251981 | 5.01470566  | 0.74026483  |
| H | -0.85975617 | 5.84089518  | 1.02575994  |
| C | 1.28049660  | 5.47237682  | 0.76393467  |
| H | 1.88998735  | 4.75107002  | 0.19535242  |

H 1.40892994 6.47509575 0.32968804  
C 1.62133884 5.40374756 2.25850606  
H 1.21784568 6.28711081 2.78462267  
H 2.70323467 5.35523033 2.45040154  
C 0.91343707 4.12934685 2.75444841  
C 0.40566841 4.20225716 4.19108200  
C 2.26716614 -4.45972013 -0.76291382  
C 1.96722829 -5.50450373 0.30794287  
C 3.11722016 -4.97804260 -1.93716359  
C 2.61656547 -4.18481636 -3.15090942  
C 1.10467613 -4.12219763 -2.90268564  
H 2.85834956 -4.65756750 -4.11454725  
H 3.02900743 -3.16263175 -3.14186907  
H 2.93328619 -6.05693531 -2.08456707  
H 4.19052267 -4.83754730 -1.74305427  
Cm 0.39113945 -0.32683438 1.11255634  
N -1.36240220 -1.60392368 3.04369044  
O -0.08868438 -1.48588479 3.23289204  
O -1.80379927 -1.09531951 1.92503071  
O -2.10146570 -2.14666080 3.84133577  
N 3.00550795 -0.35362127 2.40551353  
O 2.11350799 0.54762381 2.67094064  
O 2.64001083 -1.23706257 1.52218938  
O 4.09995317 -0.37469324 2.93511152  
N 1.77116287 0.99210757 -1.15495706  
O 2.31064916 1.54757202 -2.09706426  
O 1.51057494 -0.27462515 -1.15043998  
O 1.41170204 1.63651967 -0.08566717  
H 0.61796188 -5.06382608 -3.21794748  
H 0.62054259 -3.27823734 -3.41323209  
H -0.49141777 4.61562300 -0.23584858



H 2.91480827 -5.85823727 0.74462712  
H 1.43687093 -6.36971283 -0.12229043  
H 1.36339068 -5.06855965 1.11663902  
H -0.08132909 3.25867677 4.47696924  
H -0.30346754 5.03640604 4.31942081  
H 1.25880635 4.36205339 4.86961269  
H 1.56804001 3.24561620 2.64697433  
H 2.74030948 -3.58138180 -0.28786606  
H -4.61561680 3.42478228 -1.00646818  
H -3.64996815 -2.89296055 -3.48244214

**L3\*Nd(NO<sub>3</sub>)<sub>3</sub>(Rac)**

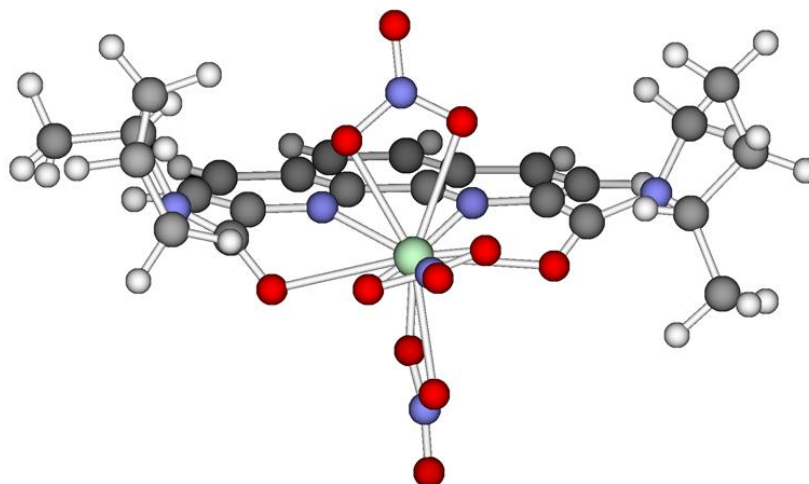

PBE/L1 theoretical level

E= -11766.853441

G = 264.5005kcal/mol, H= 340.7808 kcal/mol, U= 340.1883 kcal/mol, S= 255.8453 cal/mol at T= 298.150 K

N -1.57285821 1.12428236 0.14687414  
N -0.25127152 3.84852672 1.93044662  
N -1.09249854 -1.32844484 -0.82657534  
N 1.19480944 -4.02085781 -1.25593543  
O -0.54741788 1.68270445 2.54501104  
O 0.62383294 -2.79375601 0.56154239  
C -1.77402675 2.34155250 0.65181094

C -2.85675931 3.15012431 0.25017565  
H -3.00887680 4.12943554 0.70547885  
C -3.74055123 2.66697454 -0.69996309  
C -3.54040432 1.38593888 -1.25749040  
C -4.40120125 0.79650247 -2.23994827  
H -5.26384783 1.37029743 -2.58987665  
C -4.15884638 -0.45592749 -2.73315406  
H -4.82586288 -0.89326262 -3.48127007  
C -3.03447747 -1.22318053 -2.28574562  
C -2.73360467 -2.52442265 -2.74331069  
C -1.61237025 -3.17935085 -2.26362109  
H -1.37624943 -4.19038630 -2.59878159  
C -0.79924130 -2.53512502 -1.30662978  
C -2.16040444 -0.67125654 -1.30931056  
C -2.41706944 0.65151602 -0.78823245  
C -0.81074607 2.63360333 1.78232777  
C 0.40226981 -3.13722825 -0.61593074  
C -0.16872983 4.90462685 0.88984525  
C -0.99188322 6.14436197 1.25633585  
C 1.34703934 5.17570972 0.85802794  
H 1.83676445 4.36800671 0.29023412  
H 1.58575273 6.14354467 0.39191452  
C 1.75042188 5.09657288 2.34101748  
H 1.55448115 6.05110788 2.85469937  
H 2.81717467 4.86096287 2.46835232  
C 0.86719376 3.97006869 2.90607524  
C 2.41523099 -4.52070999 -0.54267144  
C 3.30146527 -5.04142523 -1.68867040  
C 2.84398746 -4.24466276 -2.91669202  
C 1.32509756 -4.17706585 -2.71805072  
H 3.11504889 -4.71612358 -3.87302637

H 3.26027465 -3.22416854 -2.89299631  
H 3.11717987 -6.11926937 -1.84338737  
H 4.36861372 -4.90672970 -1.45922315  
Nd 0.35462490 -0.39634359 1.32699835  
N -1.54173315 -1.75252450 3.07310653  
O -0.28706732 -1.62242460 3.36108255  
O -1.90198588 -1.23251820 1.93473542  
O -2.33022261 -2.31788659 3.80502439  
N 2.89482331 -0.34360284 2.76012993  
O 1.92220855 0.46208459 3.04719496  
O 2.63807964 -1.18924809 1.80583251  
O 3.96612859 -0.31271279 3.33373022  
N 1.83671391 0.99610245 -0.83817095  
O 2.43939734 1.58962739 -1.71699345  
O 1.52948689 -0.25291216 -0.92401809  
O 1.45210421 1.59005415 0.25368050  
H 0.84638137 -5.11600447 -3.05345106  
H -4.59974146 3.26558423 -1.01484096  
H -3.39113355 -3.00782061 -3.47093773  
H 0.47382963 4.18362904 3.91244388  
C 2.07963967 -5.56525087 0.51797658  
H 1.38591564 2.99848461 2.94983840  
H 0.86125386 -3.33022523 -3.24257207  
H -0.51497245 4.48475266 -0.06738418  
H -0.62897581 6.60434008 2.18821692  
H -2.05668306 5.90310860 1.39812899  
H -0.91498858 6.89190006 0.45086354  
H 1.44750917 -5.13003016 1.30515897  
H 3.01176715 -5.91860533 0.98723477  
H 1.56484210 -6.43076181 0.06987244  
H 2.87535834 -3.64386368 -0.05255690

**L3\*Eu(NO<sub>3</sub>)<sub>3</sub>(Rac)**

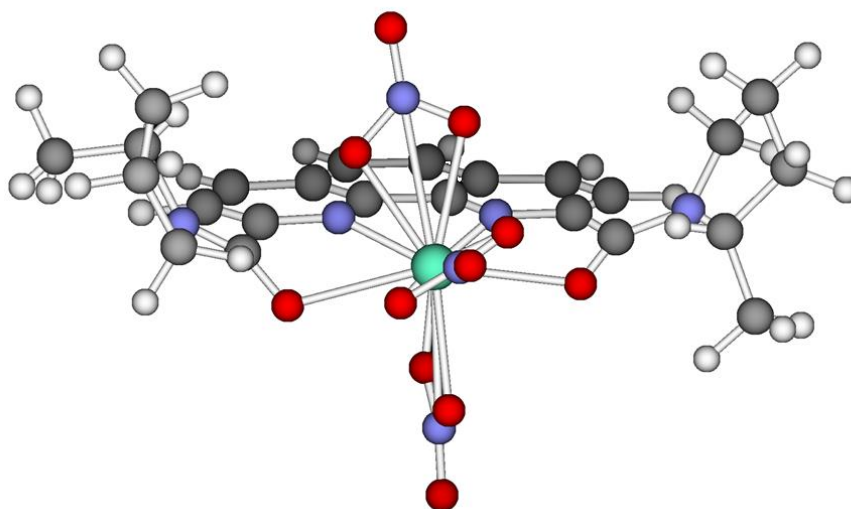

PBE/L1 theoretical level

E= -12987.850930

G= 265.0296 kcal/mol, H= 340.6648 kcal/mol, U= 340.0723 kcal/mol, S= 253.6817 cal/mol at T= 298.150 K

|   |             |             |             |
|---|-------------|-------------|-------------|
| N | -1.53222835 | 1.12253559  | 0.10859760  |
| N | -0.27230766 | 3.83455324  | 1.97394013  |
| N | -1.07777357 | -1.35203326 | -0.84026361 |
| N | 1.18349433  | -4.07384062 | -1.21160281 |
| O | -0.51781541 | 1.64168954  | 2.52051663  |
| O | 0.60642838  | -2.81090474 | 0.58121562  |
| C | -1.74540210 | 2.32758737  | 0.63617206  |
| C | -2.83458877 | 3.13224816  | 0.24100050  |
| H | -2.99977589 | 4.10189629  | 0.71215475  |
| C | -3.70497084 | 2.65938830  | -0.72587299 |
| C | -3.49572015 | 1.38584280  | -1.29819858 |
| C | -4.34901094 | 0.80342627  | -2.29145455 |
| H | -5.20708942 | 1.38110137  | -2.64627647 |
| C | -4.10719156 | -0.44810584 | -2.78701901 |
| H | -4.76888657 | -0.88031495 | -3.54272270 |
| C | -2.99412036 | -1.22397161 | -2.32628584 |
| C | -2.70447564 | -2.53180504 | -2.77277112 |

C -1.60064733 -3.20171189 -2.27439070  
H -1.37598288 -4.21791935 -2.60136223  
C -0.79317439 -2.56479120 -1.30730057  
C -2.12523961 -0.67751127 -1.34224772  
C -2.37385798 0.65070075 -0.82782948  
C -0.79486573 2.60635662 1.78393149  
C 0.39370182 -3.17263722 -0.59263504  
C -0.19070198 4.90989876 0.95279086  
C -1.03354836 6.13255835 1.33191156  
C 1.32156634 5.20135832 0.93969840  
H 1.82670188 4.41159725 0.36073685  
H 1.55075788 6.18194103 0.49588451  
C 1.71268249 5.09797668 2.42433572  
H 1.50048280 6.03944016 2.95552254  
H 2.78088927 4.87191057 2.55645370  
C 0.83767313 3.95021486 2.95878601  
C 2.39205909 -4.57604885 -0.47954103  
C 3.27825546 -5.13375616 -1.60790610  
C 2.84110379 -4.35727167 -2.85615396  
C 1.32213366 -4.26082706 -2.66967773  
H 3.11108565 -4.85458469 -3.79972911  
H 3.27480078 -3.34379005 -2.85281873  
H 3.07941532 -6.21182203 -1.74088120  
H 4.34565592 -5.00930882 -1.37421954  
Eu 0.36301607 -0.39408752 1.22265577  
N -1.52215910 -1.63932598 3.05373883  
O -0.26468509 -1.49906445 3.31338239  
O -1.90929687 -1.16133428 1.91431153  
O -2.29158330 -2.18413639 3.82555223  
N 3.03404307 -0.34818009 2.37862253  
O 2.03726864 0.24895726 2.93352938

O 2.75567746 -0.98598826 1.28383672  
O 4.16098642 -0.31887245 2.84212279  
N 1.71729195 1.26252913 -0.82662618  
O 2.27689934 1.93364739 -1.68148947  
O 1.29703856 0.06307696 -1.06077838  
O 1.49417341 1.70927835 0.36451265  
H 0.83068484 -5.19826937 -2.99011040  
H -4.56427574 3.25825405 -1.04004407  
H -3.35927320 -3.00968814 -3.50651717  
H 0.43642724 4.13784695 3.96728325  
C 2.03425622 -5.59425783 0.59940833  
H 1.36698818 2.98394918 2.98339510  
H 0.87604082 -3.41738939 -3.21457815  
H -0.52099818 4.50350714 -0.01584273  
H -0.68630701 6.57983398 2.27592373  
H -2.09676433 5.87582302 1.45829523  
H -0.95752198 6.89573956 0.54110926  
H 1.39990342 -5.13595295 1.37152445  
H 2.95778871 -5.94955635 1.08392620  
H 1.51296270 -6.46249962 0.16449706  
H 2.86190557 -3.69510579 -0.00612915

**L3\*Lu(NO<sub>3</sub>)<sub>3</sub>(Rac)**

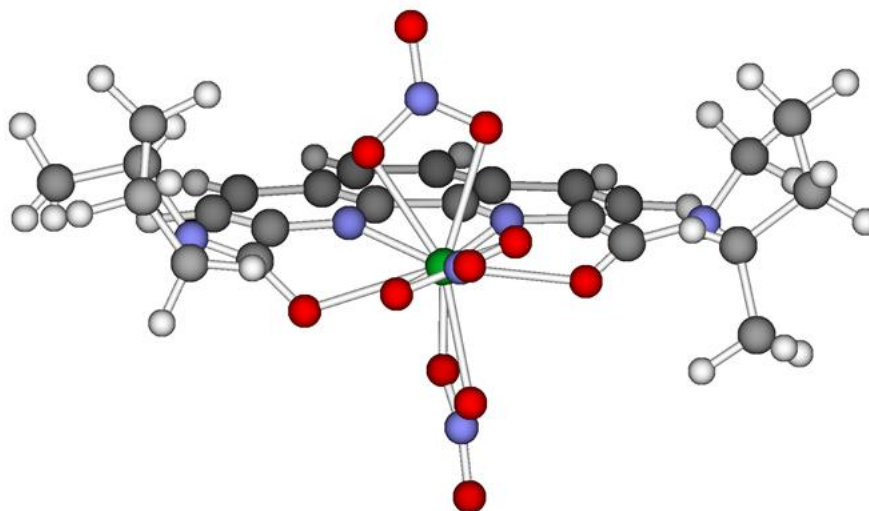

PBE/L1 theoretical level

E= -16710.256112

G= 267.4511 kcal/mol, H= 341.4316 kcal/mol, U= 340.8391 kcal/mol, S= 248.1315 cal/mol at T= 298.150 K

|   |             |             |             |
|---|-------------|-------------|-------------|
| N | -1.49200165 | 1.13996017  | 0.01671871  |
| N | -0.27305549 | 3.80064201  | 2.00467181  |
| N | -1.04434383 | -1.29854906 | -0.93858236 |
| N | 1.16522574  | -4.09238195 | -1.19414937 |
| O | -0.43722361 | 1.56839883  | 2.37008452  |
| O | 0.72716248  | -2.59367275 | 0.44104120  |
| C | -1.70062804 | 2.34087968  | 0.55671990  |
| C | -2.78688002 | 3.15326667  | 0.17075728  |
| H | -2.94906878 | 4.11880159  | 0.65054446  |
| C | -3.66579223 | 2.69251466  | -0.79540235 |
| C | -3.46769881 | 1.42077851  | -1.37374079 |
| C | -4.33257771 | 0.83433604  | -2.35558343 |
| H | -5.19292212 | 1.41222548  | -2.70448947 |
| C | -4.10338020 | -0.42321739 | -2.84426594 |
| H | -4.77898216 | -0.85743147 | -3.58647537 |
| C | -2.98777246 | -1.20127821 | -2.39214993 |
| C | -2.70618010 | -2.51907420 | -2.81439710 |
| C | -1.59586287 | -3.17983508 | -2.31525612 |
| H | -1.38517952 | -4.20569038 | -2.61925220 |
| C | -0.76548278 | -2.51974463 | -1.38221860 |
| C | -2.10305095 | -0.64380980 | -1.43094647 |
| C | -2.34330416 | 0.68289733  | -0.91591185 |
| C | -0.75323224 | 2.57925272  | 1.71163547  |
| C | 0.44012681  | -3.08524656 | -0.66733718 |
| C | -0.24880520 | 4.97247458  | 1.09383178  |
| C | -1.15759861 | 6.10515022  | 1.58490193  |
| C | 1.24576986  | 5.34352684  | 1.12200451  |
| H | 1.79474139  | 4.64220095  | 0.47291508  |

H 1.42451358 6.37231398 0.77446896  
C 1.63812876 5.11782598 2.59255672  
H 1.36961210 5.98979807 3.20973897  
H 2.71717882 4.94228983 2.71160626  
C 0.83095086 3.87410975 3.00312567  
C 2.37448192 -4.56046963 -0.44002819  
C 3.17952251 -5.32008314 -1.50938225  
C 2.73961449 -4.69162607 -2.83707070  
C 1.23741317 -4.47203875 -2.61837053  
H 2.94009757 -5.32782412 -3.71207929  
H 3.23386383 -3.71784520 -2.98677206  
H 2.91093898 -6.39083672 -1.48739612  
H 4.26091242 -5.23527479 -1.32875705  
Lu 0.44666222 -0.28712597 1.06040633  
N -1.10866022 -1.67550039 2.90677691  
O 0.15801086 -1.47611427 3.06135058  
O -1.60463715 -1.16381514 1.81315720  
O -1.78948903 -2.28802061 3.70474362  
N 3.00374413 -0.12584303 2.22756457  
O 2.02193379 0.59801841 2.64743137  
O 2.69270205 -0.92436057 1.24516177  
O 4.12401915 -0.07339477 2.69778538  
N 1.68838692 1.17190707 -1.04253244  
O 2.22176981 1.81162262 -1.93113732  
O 1.36099958 -0.06991974 -1.16723931  
O 1.39401639 1.69470203 0.11171533  
H 0.67765355 -5.40824652 -2.80146289  
H -4.52380800 3.29864311 -1.09887409  
H -3.37177920 -3.01384521 -3.52686095  
H 0.41875377 3.93568587 4.02252245  
C 2.00847292 -5.39870596 0.78163862



|   |             |             |             |
|---|-------------|-------------|-------------|
| H | 1.41407430  | 2.94075990  | 2.93258381  |
| H | 0.82617319  | -3.67656279 | -3.25510097 |
| H | -0.55288875 | 4.64458084  | 0.08765560  |
| H | -0.84119976 | 6.47165585  | 2.57330847  |
| H | -2.20546818 | 5.77823782  | 1.67206228  |
| H | -1.11878085 | 6.94724703  | 0.87581444  |
| H | 1.44729733  | -4.79804802 | 1.51157939  |
| H | 2.93194485  | -5.75015593 | 1.26898742  |
| H | 1.41087186  | -6.27816629 | 0.49118504  |
| H | 2.90999269  | -3.65294909 | -0.10753231 |

**L3\*Am(NO<sub>3</sub>)<sub>3</sub>(Rac)**

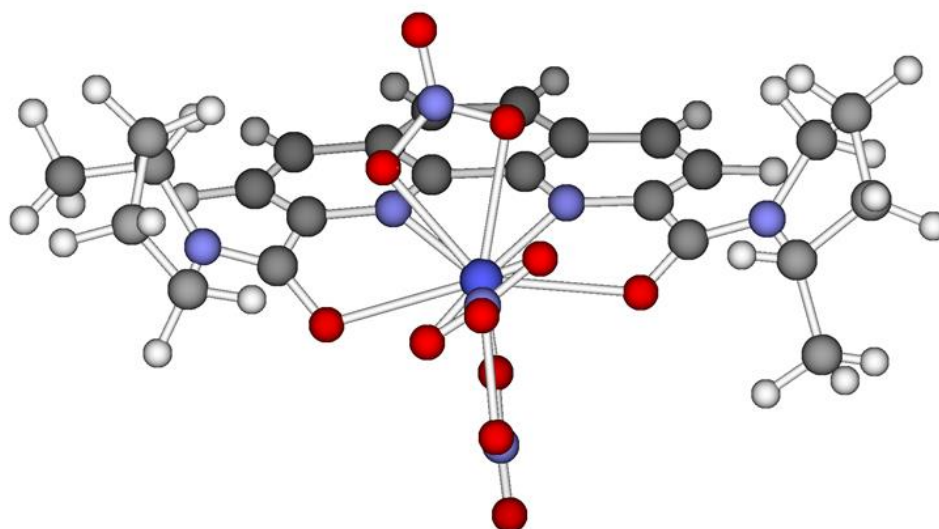

PBE/L1 theoretical level

E= -32560.362122

G= 265.3455 kcal/mol, H= 340.4623 kcal/mol, U= 339.8698 kcal/mol, S= 251.9427 cal/mol at T= 298.150 K

|   |             |             |             |
|---|-------------|-------------|-------------|
| N | -1.48201978 | 1.14206326  | 0.06658279  |
| N | -0.29000026 | 3.85108972  | 2.01131654  |
| N | -1.01460683 | -1.32805300 | -0.88907653 |
| N | 1.17371678  | -4.14431715 | -1.21489358 |
| O | -0.43055981 | 1.62611222  | 2.43724680  |
| O | 0.74575651  | -2.70329499 | 0.48158064  |
| C | -1.70643985 | 2.34820843  | 0.60414547  |

C -2.79486156 3.14815569 0.20240709  
H -2.97150636 4.11287069 0.67897373  
C -3.65511036 2.67955828 -0.77529299  
C -3.44035053 1.40634716 -1.35137856  
C -4.28897095 0.82422668 -2.34381437  
H -5.14706373 1.40033305 -2.70083213  
C -4.04827785 -0.43336824 -2.83339310  
H -4.71160316 -0.86903703 -3.58559060  
C -2.94131827 -1.20768201 -2.36789346  
C -2.66117668 -2.52485919 -2.79907227  
C -1.56273007 -3.19597292 -2.29546475  
H -1.35466051 -4.22049475 -2.60533428  
C -0.73765379 -2.55435133 -1.34547257  
C -2.06735444 -0.65675914 -1.38826203  
C -2.31893706 0.67075223 -0.87642151  
C -0.76541173 2.61678100 1.75045323  
C 0.45084095 -3.15215445 -0.65056390  
C -0.26053187 4.99192142 1.06120801  
C -1.16940522 6.14277172 1.50743496  
C 1.23348701 5.36573124 1.08276403  
H 1.78731847 4.64440203 0.46032816  
H 1.41229248 6.38325691 0.70360577  
C 1.61790967 5.18883657 2.56179380  
H 1.33877289 6.07706547 3.15048313  
H 2.69719458 5.02455902 2.69453406  
C 0.81449062 3.95400453 3.00429153  
C 2.36689234 -4.66327906 -0.47104847  
C 3.17918968 -5.37646627 -1.56653118  
C 2.76915574 -4.67026186 -2.86418509  
C 1.26630259 -4.44627523 -2.65712810  
H 2.97782016 -5.25943279 -3.76965904

H 3.27694798 -3.69576144 -2.95169163  
H 2.89498687 -6.44274521 -1.60726297  
H 4.25856304 -5.31792164 -1.36435270  
Am 0.42316610 -0.33880350 1.11028814  
N -1.36702609 -1.63823116 3.00719738  
O -0.11103614 -1.41055691 3.23793983  
O -1.78873241 -1.22738242 1.85017014  
O -2.09163117 -2.19233513 3.80951071  
N 3.12555885 -0.22935781 2.18434000  
O 2.10681057 0.30614981 2.77888870  
O 2.83880544 -0.85079974 1.08033121  
O 4.25703764 -0.15519339 2.62065005  
N 1.73038173 1.37079418 -0.92748755  
O 2.27581716 2.04492831 -1.78365338  
O 1.27823400 0.17877544 -1.16858506  
O 1.54496741 1.79186821 0.28054726  
H 0.70070344 -5.36487818 -2.90107536  
H -4.51363039 3.27756310 -1.09238100  
H -3.32329941 -3.00818896 -3.52234244  
H 0.40669560 4.03655243 4.02413988  
C 1.97515368 -5.55896711 0.70104128  
H 1.40215886 3.02299786 2.95398378  
H 0.87089521 -3.61303115 -3.25461674  
H -0.56137097 4.62863445 0.06619097  
H -0.84698933 6.55323362 2.47660112  
H -2.21676350 5.82166290 1.61702418  
H -1.13562393 6.95315647 0.76197147  
H 1.40160346 -4.99411440 1.44976604  
H 2.88705325 -5.94075823 1.18742502  
H 1.37827587 -6.41875505 0.35581270  
H 2.91169739 -3.78152347 -0.08821142

**L3\*Cm(NO<sub>3</sub>)<sub>3</sub>(Rac)**

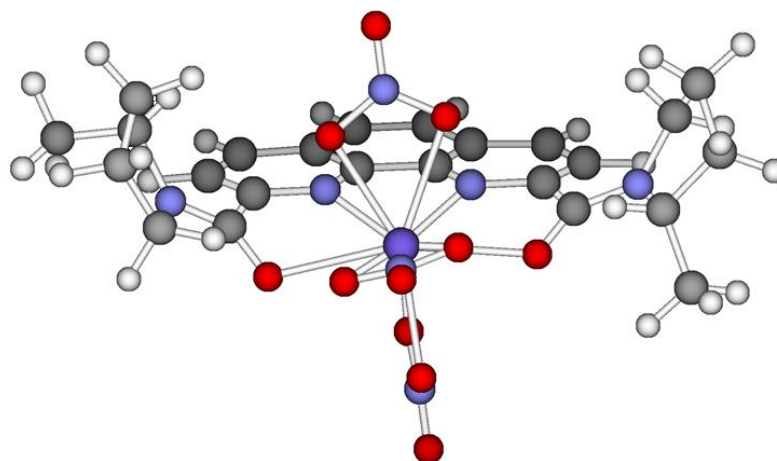

PBE/L1 theoretical level

E= -33396.680655

G= 264.5588 kcal/mol, H= 340.8870 kcal/mol, U= 340.2945 kcal/mol, S= 256.0059 cal/mol at T= 298.150 K

|   |             |             |             |
|---|-------------|-------------|-------------|
| N | -1.56563902 | 1.13039362  | 0.11047891  |
| N | -0.25685772 | 3.83911896  | 1.93473995  |
| N | -1.09185684 | -1.31893134 | -0.86447597 |
| N | 1.18202853  | -4.02675867 | -1.24558449 |
| O | -0.52418363 | 1.65639901  | 2.49694848  |
| O | 0.60245454  | -2.77223659 | 0.54904389  |
| C | -1.76855958 | 2.34221387  | 0.62737221  |
| C | -2.85417128 | 3.15109992  | 0.23278280  |
| H | -3.00979543 | 4.12593985  | 0.69651628  |
| C | -3.73569608 | 2.67488599  | -0.72273618 |
| C | -3.53417373 | 1.39798617  | -1.29021084 |
| C | -4.39417410 | 0.81167537  | -2.27552366 |
| H | -5.25685310 | 1.38642061  | -2.62384772 |
| C | -4.15389776 | -0.44054106 | -2.77117538 |
| H | -4.82271719 | -0.87553900 | -3.51901865 |
| C | -3.03229046 | -1.21154606 | -2.32302713 |
| C | -2.73625898 | -2.51676679 | -2.77336383 |

C -1.62164712 -3.17731833 -2.28563380  
H -1.39307106 -4.19268894 -2.61302400  
C -0.80595487 -2.53150058 -1.33136880  
C -2.15641046 -0.66054702 -1.34821439  
C -2.41046047 0.66266108 -0.82439363  
C -0.80316073 2.62298512 1.75783360  
C 0.38874778 -3.13131928 -0.62637752  
C -0.18926717 4.92070246 0.91940624  
C -1.02702296 6.14105225 1.31645250  
C 1.32304096 5.21081400 0.89176512  
H 1.82121217 4.42253447 0.30447996  
H 1.54899037 6.19218636 0.44808152  
C 1.72997463 5.10155058 2.37176061  
H 1.51952505 6.03979921 2.90908241  
H 2.80025029 4.87924814 2.49222994  
C 0.86559343 3.94715309 2.90826535  
C 2.39581919 -4.52094221 -0.51603371  
C 3.28139067 -5.07397270 -1.64722073  
C 2.83577967 -4.30035686 -2.89446783  
C 1.31666470 -4.21404600 -2.70363379  
H 3.10614157 -4.79644442 -3.83858919  
H 3.26196218 -3.28379345 -2.89229584  
H 3.08805227 -6.15326738 -1.77882349  
H 4.34871960 -4.94340467 -1.41681671  
Cm 0.37254778 -0.38671842 1.29007995  
N -1.42949677 -1.76354802 3.10343885  
O -0.16938362 -1.61615205 3.35374331  
O -1.83476889 -1.23487687 1.98034739  
O -2.18739033 -2.35008359 3.85067749  
N 2.93112874 -0.34076628 2.69143438  
O 1.98255563 0.49983957 2.96028709

O 2.64465451 -1.20440805 1.76080132  
O 4.00643921 -0.32554388 3.25890732  
N 1.83454621 1.02155352 -0.87414134  
O 2.41243434 1.61434615 -1.76996863  
O 1.56957424 -0.24151386 -0.93210077  
O 1.43537152 1.62406003 0.20630457  
H 0.83051962 -5.15527630 -3.02108598  
H -4.59523916 3.27528024 -1.03316820  
H -3.39430141 -3.00046134 -3.50034237  
H 0.47436729 4.12551546 3.92218518  
C 2.04795241 -5.53934622 0.56580573  
H 1.39935505 2.98253131 2.92037463  
H 0.86297166 -3.37379122 -3.24721336  
H -0.53123093 4.51871252 -0.04694314  
H -0.66846031 6.58279228 2.25873160  
H -2.08866143 5.88367033 1.45384097  
H -0.96030647 6.90860701 0.52912253  
H 1.42191696 -5.08060074 1.34433353  
H 2.97632480 -5.89382267 1.04141831  
H 1.52293885 -6.40773916 0.13547508  
H 2.86141205 -3.63715816 -0.04372763

**L4\*La(NO<sub>3</sub>)<sub>3</sub> (Meso)**

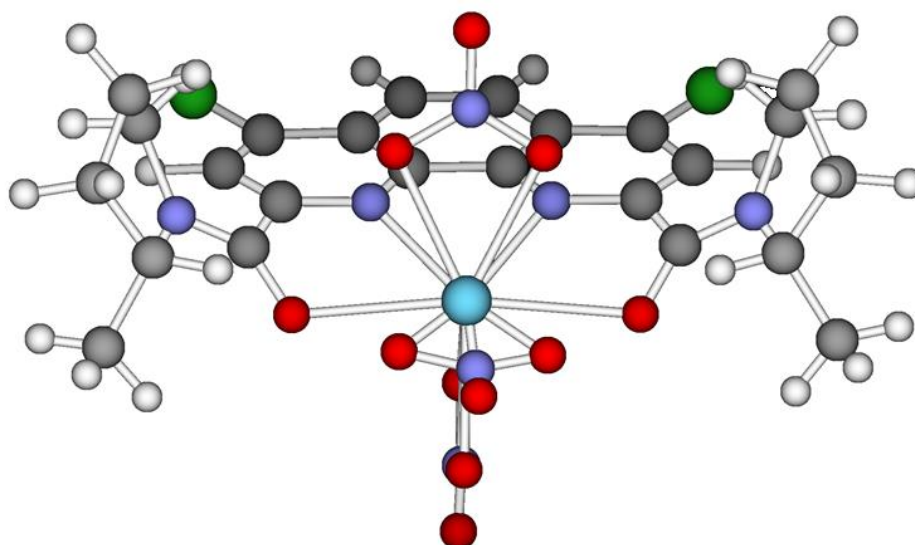

PBE/L1 theoretical level

E= -11557.266649

G= 248.7822 kcal/mol, H= 330.5046 kcal/mol, U= 329.9121 kcal/mol, S= 274.0981 cal/mol at T= 298.150 K

Cl -5.10346889 3.80653381 -1.07529879  
Cl -4.05745983 -3.21315384 -3.88121367  
N -1.61836505 1.16165257 0.09100277  
N -0.13559902 3.94099236 1.67342746  
N -1.25614023 -1.29521763 -0.88543433  
N 1.03877211 -3.90124321 -1.44168806  
O -0.32706460 1.78614986 2.36461353  
O 0.33143547 -2.96634531 0.50536668  
C -1.73376584 2.39658189 0.57011616  
C -2.80093479 3.24726200 0.22558121  
H -2.89156103 4.24313736 0.66029590  
C -3.75871825 2.77917743 -0.65823573  
C -3.65006471 1.48106861 -1.21956944  
C -4.56895638 0.91228676 -2.15429401  
H -5.42895222 1.50747514 -2.46561694  
C -4.38178778 -0.34617731 -2.65650034  
H -5.09096193 -0.76472396 -3.37250638  
C -3.26056409 -1.14086187 -2.26531029  
C -2.98204350 -2.44700885 -2.74366689  
C -1.85573995 -3.12936664 -2.31517935  
H -1.64718544 -4.13585424 -2.67945433  
C -1.01099253 -2.50574517 -1.37811589  
C -2.33058834 -0.61821127 -1.32266760  
C -2.52821875 0.71657258 -0.79094189  
C -0.67256516 2.71153092 1.60385084  
C 0.18445268 -3.16030049 -0.71755821  
C -0.13845389 4.94828272 0.59315526  
H -0.80320710 5.79228306 0.85431254

C 1.32663441 5.39795685 0.55530190  
H 1.91886353 4.64640045 0.00775934  
H 1.44741344 6.37617254 0.06665414  
C 1.70620430 5.40465164 2.04186797  
H 1.32053506 6.31652927 2.53121400  
H 2.79248977 5.36026287 2.20872903  
C 1.00507557 4.16299057 2.62299800  
C 0.53426093 4.31656504 4.06581259  
C 2.28521252 -4.39881086 -0.77106428  
C 2.02728796 -5.64236879 0.07402193  
C 3.25554848 -4.61124372 -1.94818771  
C 2.73111820 -3.68256211 -3.05155754  
C 1.21203887 -3.82808352 -2.90660620  
H 3.08011675 -3.95648408 -4.05823994  
H 3.01049805 -2.63668108 -2.84322429  
H 3.21637607 -5.66323948 -2.28204870  
H 4.29029179 -4.38475227 -1.65192890  
La 0.35907096 -0.48599595 1.30598402  
N -1.67945862 -1.50758958 3.23172855  
O -0.42494798 -1.44185281 3.53458714  
O -1.98961377 -1.09833658 2.02887344  
O -2.52334571 -1.91959476 4.00347996  
N 2.97096872 -0.68830770 2.73160791  
O 2.23200083 0.38052675 2.77903771  
O 2.48446107 -1.66650581 2.02700520  
O 4.04197216 -0.76551545 3.30158091  
N 1.84627330 0.65224862 -1.09844863  
O 2.39686346 1.10938537 -2.08672905  
O 1.69689322 -0.62413657 -0.92233759  
O 1.37023115 1.41048908 -0.16162519  
H 0.85575283 -4.75995064 -3.38305378



H 0.65707856 -2.97546697 -3.32165408  
H -0.47568288 4.50301456 -0.35303900  
H 2.97531366 -5.97807550 0.52403229  
H 1.62283528 -6.46304226 -0.54072565  
H 1.32699656 -5.41750097 0.89179075  
H 0.04326862 3.39632607 4.41407537  
H -0.16128293 5.16560602 4.16732788  
H 1.40624273 4.50050020 4.71362543  
H 1.65318942 3.27144146 2.54713511  
H 2.63365269 -3.58174801 -0.11423010

PBE0/L1 theoretical level

E=-11557.214063

N -1.61208987 1.15442228 0.10872699  
N -0.13270067 3.90281487 1.66658843  
N -1.24210370 -1.28226745 -0.86777699  
N 1.04388571 -3.85481811 -1.44135797  
O -0.32767507 1.77234685 2.35670996  
O 0.38347220 -2.89955854 0.48319829  
C -1.72869718 2.37349176 0.58582586  
C -2.78933954 3.21796966 0.24792759  
H -2.87905502 4.20599985 0.68043089  
C -3.73909688 2.75141072 -0.62759829  
C -3.62708640 1.46287227 -1.18417156  
C -4.54396296 0.89458477 -2.11400461  
H -5.40097332 1.48149657 -2.42045999  
C -4.35505486 -0.35019490 -2.61272216  
H -5.05966520 -0.76737374 -3.32147455  
C -3.23256373 -1.13658345 -2.22566986  
C -2.95252466 -2.43096638 -2.70398498  
C -1.83006120 -3.10193253 -2.28430581  
H -1.61850691 -4.09933853 -2.64723825

C -0.99246633 -2.47609878 -1.35745084  
C -2.31324458 -0.61599463 -1.29476535  
C -2.51441097 0.70924890 -0.76376480  
C -0.66769636 2.68936849 1.60757554  
C 0.21350965 -3.11348629 -0.71808624  
C -0.14329205 4.89513493 0.58898264  
H -0.81110919 5.72834444 0.84085780  
C 1.30755210 5.35658979 0.55193621  
H 1.90358627 4.61479712 0.01127202  
H 1.41848600 6.32804251 0.06531326  
C 1.68205988 5.36866570 2.02891636  
H 1.28339922 6.26775074 2.51366663  
H 2.76051474 5.34035540 2.19797611  
C 1.00093389 4.12538385 2.60159254  
C 0.54071116 4.26960039 4.03823709  
C 2.28630662 -4.35126066 -0.79424298  
C 2.02748370 -5.54015779 0.10915178  
C 3.19999671 -4.64893675 -1.98347700  
C 2.68519402 -3.73808789 -3.09129190  
C 1.17635870 -3.81522202 -2.89971662  
H 2.98998570 -4.05225134 -4.09190702  
H 3.01337361 -2.70751357 -2.92385221  
H 3.09634137 -5.69995832 -2.27820277  
H 4.24687767 -4.46760845 -1.73127818  
La 0.37541854 -0.46717015 1.31092751  
N -1.64237666 -1.53370857 3.20108032  
O -0.41250327 -1.46721351 3.50070906  
O -1.94980860 -1.11082208 2.03316259  
O -2.46916986 -1.96209860 3.95379639  
N 2.99225926 -0.62168872 2.68965340  
O 2.23767996 0.40085551 2.77351594

O 2.54056168 -1.57578039 1.97711456  
O 4.05494928 -0.68003815 3.23860931  
N 1.78827178 0.71183288 -1.09074354  
O 2.29566526 1.18335140 -2.07274747  
O 1.65049565 -0.54185832 -0.93966466  
O 1.35090530 1.43741977 -0.14418611  
H 0.77295280 -4.73223066 -3.34695220  
H 0.65304017 -2.95309663 -3.31534600  
H -0.46813133 4.44648838 -0.35072756  
H 2.97547841 -5.88452053 0.53259641  
H 1.57798612 -6.36604404 -0.45129222  
H 1.37111664 -5.26205587 0.93608063  
H 0.06571475 3.35035014 4.38653040  
H -0.16006927 5.10411119 4.14200258  
H 1.40738130 4.46385193 4.67677593  
H 1.65526271 3.24978161 2.51805186  
H 2.68318796 -3.52270746 -0.19610749  
Cl -5.07467365 3.76615286 -1.04010439  
Cl -4.01824808 -3.19424391 -3.82882071

**L4\*Nd(NO<sub>3</sub>)<sub>3</sub>(Meso)**

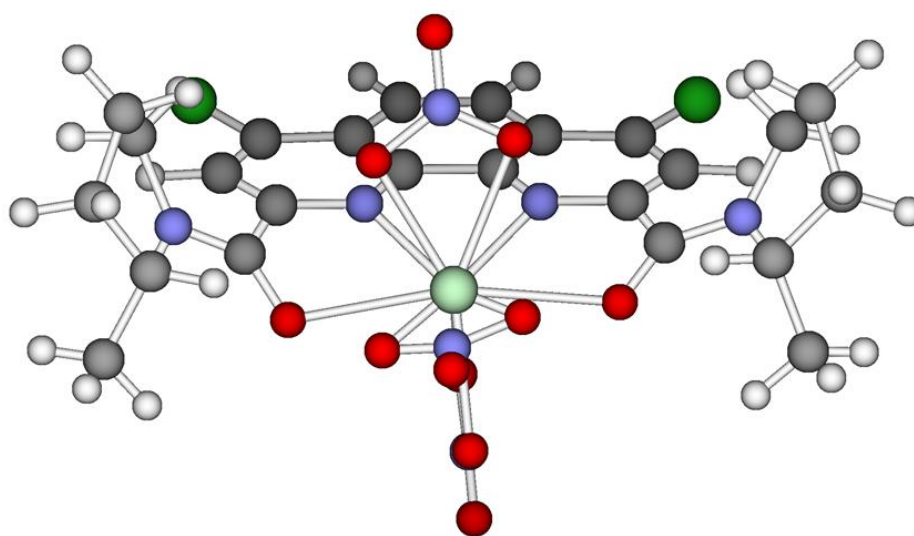

PBE/L1 theoretical level

E= -12688.660431

G= 249.5193 kcal/mol, H= 330.4197 kcal/mol, U= 329.8272 kcal/mol, S= 271.3412 cal/mol at T= 298.150 K

Cl -5.09027338 3.81483221 -1.11592126  
Cl -3.99753070 -3.22403049 -3.85993290  
N -1.57514548 1.20833290 0.05594091  
N -0.18168329 3.95502234 1.76847088  
N -1.17826247 -1.23493147 -0.92459422  
N 1.05587018 -3.95576692 -1.45413613  
O -0.40024456 1.77884889 2.39057326  
O 0.57647502 -2.72956467 0.39152747  
C -1.72448623 2.43185401 0.55947840  
C -2.79803133 3.27077651 0.21050546  
H -2.90884876 4.25879669 0.65828466  
C -3.73822570 2.79966831 -0.69120145  
C -3.60947132 1.50636053 -1.25776255  
C -4.52162886 0.92628324 -2.19198370  
H -5.38716841 1.51228726 -2.50531101  
C -4.32403421 -0.33336863 -2.68747354  
H -5.03067732 -0.76270473 -3.39959598  
C -3.19600463 -1.11575615 -2.29236650  
C -2.91385937 -2.42742634 -2.74999523  
C -1.77753365 -3.09305310 -2.32192278  
H -1.57569253 -4.10669422 -2.66758609  
C -0.92060572 -2.44677067 -1.41072702  
C -2.26436615 -0.57614112 -1.36059332  
C -2.47654748 0.75548124 -0.83280414  
C -0.70965743 2.72667122 1.64231932  
C 0.30402330 -3.06657362 -0.77657479  
C -0.14083590 4.98619604 0.71230644  
H -0.81161737 5.82725000 0.96788156  
C 1.32700121 5.42795658 0.73815739  
H 1.93342400 4.68270016 0.19784805

H 1.47121739 6.41548967 0.27531931  
C 1.65089190 5.40093374 2.23786163  
H 1.25254059 6.30459213 2.73235798  
H 2.73006368 5.34589911 2.44327426  
C 0.92256492 4.15087652 2.76538038  
C 0.39619353 4.27589607 4.19163847  
C 2.29905009 -4.47617245 -0.79572469  
C 1.99440026 -5.52031088 0.27448723  
C 3.12728834 -5.00386286 -1.98104405  
C 2.62899137 -4.19517088 -3.18517756  
C 1.12098312 -4.10668039 -2.92166138  
H 2.85208011 -4.66674280 -4.15380001  
H 3.06031919 -3.18076682 -3.17558527  
H 2.92142820 -6.07822037 -2.13189244  
H 4.20505333 -4.88494253 -1.79735577  
Nd 0.40091956 -0.32448241 1.15550983  
N -1.43127477 -1.61593103 3.01388502  
O -0.16291191 -1.50084436 3.24158168  
O -1.83414888 -1.11307681 1.88111329  
O -2.19486427 -2.15189838 3.79193234  
N 2.98918390 -0.33061707 2.49381185  
O 2.06786585 0.53729659 2.77081704  
O 2.65926647 -1.20290089 1.58701682  
O 4.07715750 -0.33076578 3.03483224  
N 1.78284824 1.00528002 -1.10712516  
O 2.34162021 1.57085097 -2.03096223  
O 1.49173689 -0.25202182 -1.13284290  
O 1.43231714 1.63448536 -0.02379660  
H 0.61476648 -5.03692675 -3.23992801  
H 0.64807338 -3.25054407 -3.42241096  
H -0.44467950 4.56335115 -0.25536856

H 2.94106245 -5.88921356 0.70051908  
H 1.44784820 -6.37624359 -0.15380614  
H 1.40460086 -5.07983732 1.09099376  
H -0.10945935 3.34928179 4.49993086  
H -0.30140018 5.12430429 4.28436899  
H 1.24230039 4.44379473 4.87702560  
H 1.56791770 3.25688267 2.69504166  
H 2.79182601 -3.60757613 -0.32302889

**L4\*Eu(NO<sub>3</sub>)<sub>3</sub>(Meso)**

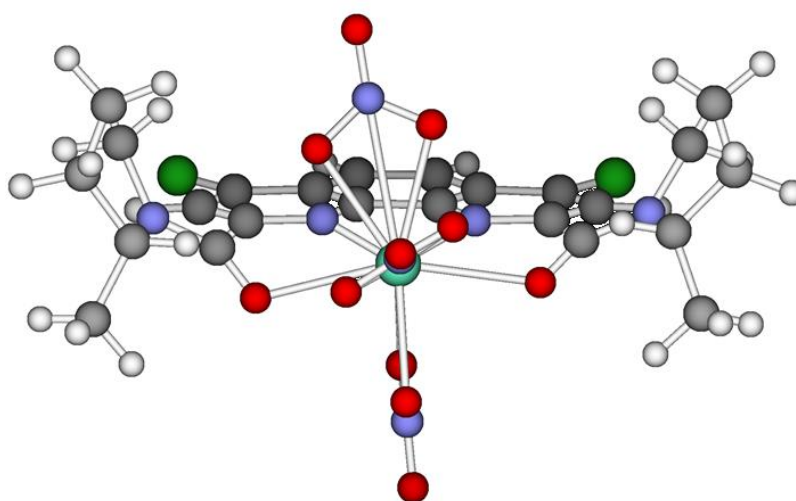

PBE/L1 theoretical level

E= -13909.657847

G= 250.1906 kcal/mol, H= 330.3205 kcal/mol, U= 329.7280 kcal/mol, S= 268.7568 cal/mol at T= 298.150 K

Cl -5.05179358 3.81555009 -1.15422118  
Cl -3.97889280 -3.23171735 -3.88051653  
N -1.54213095 1.20728993 0.01993469  
N -0.19978689 3.93920660 1.81132805  
N -1.17381179 -1.25938284 -0.92737991  
N 1.04469287 -4.00064993 -1.40484512  
O -0.39483953 1.74246144 2.37836528  
O 0.56643730 -2.73370337 0.41504940  
C -1.69984186 2.42147422 0.54212940

C -2.77612185 3.25913525 0.19513287  
H -2.89529490 4.24061918 0.65503573  
C -3.70375061 2.79739714 -0.72350198  
C -3.57041144 1.50792027 -1.29929316  
C -4.47682905 0.93291473 -2.24252534  
H -5.33660460 1.52359056 -2.56298327  
C -4.28283167 -0.32821217 -2.73552823  
H -4.98572397 -0.75368077 -3.45357132  
C -3.16700745 -1.11983514 -2.32388282  
C -2.89732885 -2.44006562 -2.76526403  
C -1.77697349 -3.11902237 -2.31704760  
H -1.58684981 -4.13854265 -2.65159678  
C -0.92338949 -2.47711802 -1.39898658  
C -2.23987460 -0.58427352 -1.38576794  
C -2.44164801 0.75481766 -0.86984211  
C -0.70154566 2.70191216 1.64764726  
C 0.29479855 -3.09563828 -0.74602526  
C -0.13396733 4.97687531 0.76208925  
H -0.81044632 5.81670046 1.00654018  
C 1.33316720 5.41778183 0.82111597  
H 1.94911444 4.67492294 0.28872183  
H 1.48689735 6.40875578 0.36873227  
C 1.62510097 5.37977743 2.32701683  
H 1.21370995 6.27791977 2.82105064  
H 2.69968557 5.32509136 2.55520988  
C 0.88861465 4.12313604 2.82624364  
C 0.34075373 4.22640944 4.24623489  
C 2.28595853 -4.51244020 -0.73558301  
C 1.97681868 -5.52420998 0.36419076  
C 3.10587192 -5.08138180 -1.90760064  
C 2.60976100 -4.30567265 -3.13405585

C 1.10378242 -4.19415236 -2.86795568  
H 2.82383919 -4.80937958 -4.08839893  
H 3.05214548 -3.29630971 -3.15873265  
H 2.89225912 -6.15830612 -2.02534366  
H 4.18500805 -4.96453714 -1.73137105  
Eu 0.39495873 -0.31353065 1.05940425  
N -1.40605712 -1.53046584 2.99008107  
O -0.13851792 -1.38281000 3.19288421  
O -1.84495163 -1.05996323 1.86588323  
O -2.13782096 -2.07428575 3.79764032  
N 3.11568952 -0.29286709 2.08970404  
O 2.15645456 0.33288443 2.67750692  
O 2.77568269 -0.94363385 1.01944292  
O 4.26253414 -0.27851132 2.50117803  
N 1.66410601 1.29518282 -1.07597506  
O 2.19798660 1.94011927 -1.96538508  
O 1.22781110 0.09284188 -1.26640832  
O 1.48432946 1.77163446 0.11162185  
H 0.58717799 -5.12806892 -3.15718365  
H 0.63814121 -3.34841704 -3.39246464  
H -0.41546810 4.56027031 -0.21504395  
H 2.92199707 -5.88739014 0.79838043  
H 1.42455018 -6.38828182 -0.03952000  
H 1.38985777 -5.05868912 1.16870892  
H -0.17108984 3.29574418 4.53149509  
H -0.35805827 5.07360792 4.34059668  
H 1.17537367 4.38325405 4.94813967  
H 1.53674984 3.23165607 2.75128937  
H 2.78784251 -3.63370824 -0.29192442



**L4\*Lu(NO<sub>3</sub>)<sub>3</sub>(RS)**

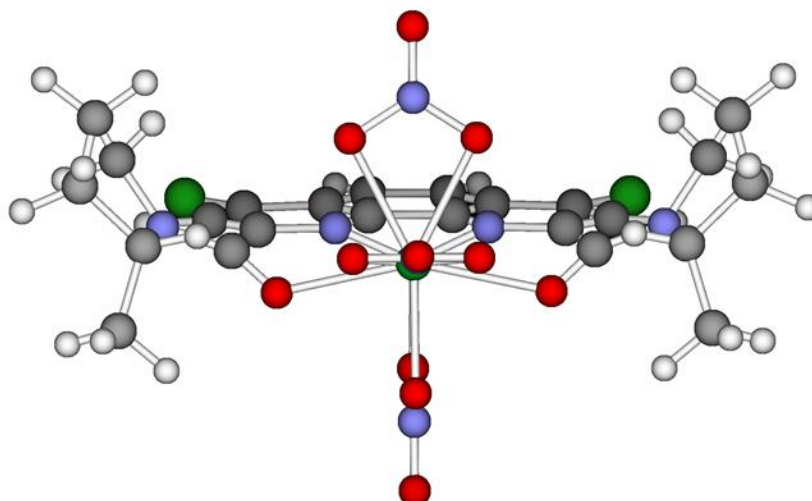

PBE/L1 theoretical level

E= -17632.062357

G= 253.0827 kcal/mol, H 330.4089 kcal/mol, U= 329.8164 kcal/mol, S= 259.3531 cal/mol at T= 298.150 K

|    |             |             |             |
|----|-------------|-------------|-------------|
| Cl | -5.07233953 | 3.83281374  | -1.09384477 |
| Cl | -4.00664043 | -3.20299125 | -3.91261053 |
| N  | -1.52108610 | 1.22319877  | -0.05450095 |
| N  | -0.18761857 | 3.93530798  | 1.81443262  |
| N  | -1.15484285 | -1.19716454 | -1.02394283 |
| N  | 1.01424003  | -3.99153996 | -1.36156964 |
| O  | -0.16214570 | 1.69031894  | 2.12947369  |
| O  | 0.49726591  | -2.64766645 | 0.38933086  |
| C  | -1.66086674 | 2.43235135  | 0.48020110  |
| C  | -2.75357795 | 3.26782298  | 0.17905433  |
| H  | -2.87420487 | 4.23859596  | 0.65976208  |
| C  | -3.70461655 | 2.81742954  | -0.72277552 |
| C  | -3.57787108 | 1.54143405  | -1.32722580 |
| C  | -4.49794817 | 0.96803445  | -2.25908160 |
| H  | -5.36773443 | 1.55497944  | -2.55901837 |
| C  | -4.30738449 | -0.29031155 | -2.76327348 |
| H  | -5.02398396 | -0.71476561 | -3.46848249 |

C -3.18067312 -1.08137918 -2.37807107  
C -2.91379118 -2.40346026 -2.81449819  
C -1.79173410 -3.08130550 -2.36483932  
H -1.60987866 -4.10738277 -2.68439078  
C -0.92439717 -2.42902160 -1.46760249  
C -2.23548865 -0.53947800 -1.46401727  
C -2.43682075 0.79063100 -0.93117774  
C -0.60635900 2.68969631 1.53276277  
C 0.26379681 -3.04839897 -0.76699120  
C -0.29974186 5.11080313 0.92876863  
H -1.05862403 5.81665993 1.31440544  
C 1.10298681 5.72566605 1.00799298  
H 1.78144062 5.16783667 0.34218314  
H 1.10631776 6.78562784 0.71328717  
C 1.48211253 5.49701357 2.47680354  
H 0.99423647 6.25161648 3.11868382  
H 2.56628132 5.54672575 2.65390968  
C 0.92981368 4.09762049 2.80328441  
C 0.45657253 3.92613149 4.24362135  
C 2.23203039 -4.48558903 -0.63645226  
C 1.88211536 -5.46124458 0.48318502  
C 3.08643508 -5.09131765 -1.76475072  
C 2.62812924 -4.35505819 -3.03018546  
C 1.11455381 -4.23552799 -2.81377125  
H 2.87115550 -4.88854980 -3.96115780  
H 3.06924701 -3.34585786 -3.07151556  
H 2.87670827 -6.17175961 -1.85487568  
H 4.15967798 -4.96716976 -1.55982983  
Lu 0.49724078 -0.28637388 0.90445697  
N -1.05259120 -1.34490764 2.95048571  
O 0.22702582 -1.18798435 3.04257965

O -1.55935419 -0.96240151 1.80959511  
O -1.73351097 -1.80728996 3.84250784  
N 3.09357834 -0.32570183 1.98773324  
O 2.29082656 0.68524092 2.11239600  
O 2.59735465 -1.30914617 1.30273950  
O 4.20976210 -0.34937897 2.46834755  
N 1.68931127 0.82953769 -1.41960418  
O 2.17505717 1.30930221 -2.42740083  
O 1.55695462 -0.44774044 -1.24395728  
O 1.25896394 1.55418396 -0.43469989  
H 0.60494924 -5.17865086 -3.08522296  
H 0.66637528 -3.40677094 -3.37915039  
H -0.57518208 4.80504847 -0.09004793  
H 2.81140518 -5.81898117 0.95441061  
H 1.33169627 -6.33227968 0.09168208  
H 1.28065836 -4.96318436 1.25707972  
H 0.08409724 2.90518641 4.40997410  
H -0.33525571 4.65246201 4.48935652  
H 1.30586004 4.09214115 4.92535782  
H 1.67061102 3.31128383 2.57069755  
H 2.71941972 -3.59497142 -0.20000751

**L4\*Am(NO<sub>3</sub>)<sub>3</sub>(RS)**

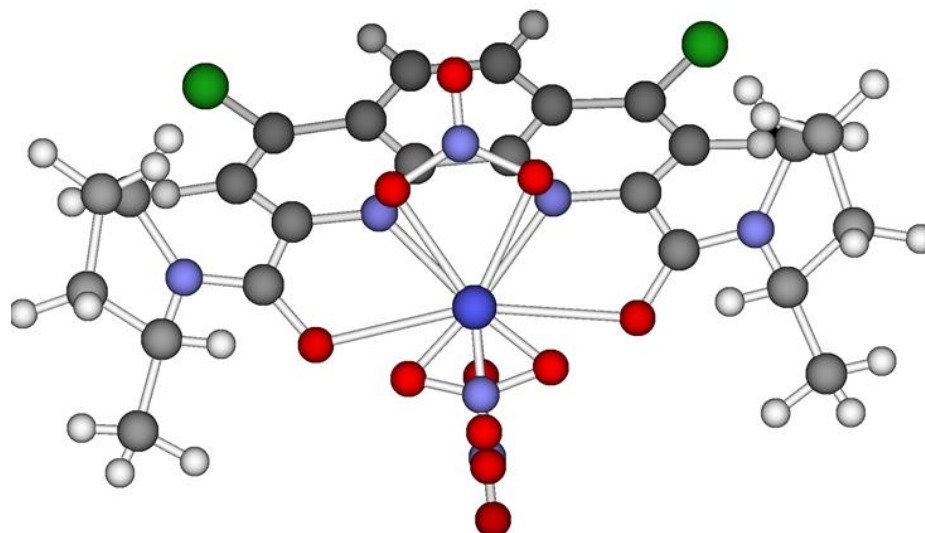

PBE/L1 theoretical level

E= -33482.166813

G= 250.7916 kcal/mol, H= 329.5601 kcal/mol, U= 328.9677 kcal/mol, S= 264.1912 cal/mol at T= 298.150 K

|    |             |             |             |
|----|-------------|-------------|-------------|
| Cl | -5.05494356 | 3.82072973  | -1.08657491 |
| Cl | -3.98552608 | -3.19207525 | -3.90334082 |
| N  | -1.49735618 | 1.22284365  | -0.00845731 |
| N  | -0.19598915 | 4.00737667  | 1.79380572  |
| N  | -1.12516689 | -1.21889091 | -0.98893642 |
| N  | 1.02372813  | -4.02820730 | -1.42694771 |
| O  | -0.15142263 | 1.77208114  | 2.19019890  |
| O  | 0.53486586  | -2.74178743 | 0.37905946  |
| C  | -1.64468515 | 2.44734454  | 0.50997072  |
| C  | -2.73636413 | 3.27461433  | 0.19242869  |
| H  | -2.85630178 | 4.25152540  | 0.66034037  |
| C  | -3.68613911 | 2.81148481  | -0.70193309 |
| C  | -3.55641341 | 1.52718103  | -1.29036367 |
| C  | -4.47653151 | 0.95527726  | -2.21725821 |
| H  | -5.34706736 | 1.54213238  | -2.51445675 |
| C  | -4.28453827 | -0.30367661 | -2.72297597 |
| H  | -5.00052261 | -0.73017746 | -3.42726541 |
| C  | -3.15748429 | -1.08906150 | -2.34124541 |
| C  | -2.89075089 | -2.40561843 | -2.79737592 |
| C  | -1.76689410 | -3.08657169 | -2.36191416 |
| H  | -1.58254671 | -4.10745716 | -2.69575667 |
| C  | -0.89831150 | -2.45160747 | -1.45681965 |
| C  | -2.21264863 | -0.55183595 | -1.41958702 |
| C  | -2.41506076 | 0.77560425  | -0.88642848 |
| C  | -0.60483724 | 2.74701118  | 1.55291128  |
| C  | 0.28407130  | -3.09874392 | -0.79222149 |
| C  | -0.29756126 | 5.14591980  | 0.85948038  |
| H  | -1.07513416 | 5.85696554  | 1.19537473  |

C 1.09425724 5.78290892 0.95097578  
H 1.79758275 5.21059561 0.32424498  
H 1.09198940 6.83110237 0.61683792  
C 1.43669522 5.61430120 2.43654537  
H 0.91773170 6.38214254 3.03699493  
H 2.51432252 5.68995762 2.64245224  
C 0.89777678 4.21832371 2.79766846  
C 0.39974341 4.08678436 4.23398161  
C 2.22870064 -4.57699442 -0.72326446  
C 1.85796940 -5.58490562 0.36080059  
C 3.06747556 -5.16077566 -1.87449789  
C 2.63495755 -4.35710764 -3.10730219  
C 1.12461185 -4.20674086 -2.88902998  
H 2.86734891 -4.85532999 -4.06025934  
H 3.10374808 -3.35951614 -3.10306811  
H 2.82302570 -6.22905111 -2.01066875  
H 4.14360762 -5.08056784 -1.66270924  
Am 0.45922473 -0.31083837 0.95207739  
N -1.20357764 -1.41590154 3.07329535  
O 0.07578292 -1.27169168 3.19794416  
O -1.69328046 -1.02910364 1.92622173  
O -1.90548551 -1.87577021 3.95179486  
N 3.09276724 -0.40838599 2.19322872  
O 2.30789590 0.61915290 2.28507280  
O 2.61170554 -1.38032770 1.48322189  
O 4.18305588 -0.45611241 2.72533655  
N 1.86791992 0.83330280 -1.36638331  
O 2.41493201 1.30874574 -2.34452152  
O 1.70528805 -0.44385070 -1.20964706  
O 1.39843667 1.56577253 -0.40446755  
H 0.59132850 -5.12180614 -3.20730138

H 0.69903833 -3.34108996 -3.41567326  
 H -0.54345411 4.79609013 -0.15290301  
 H 2.77880788 -5.98199129 0.81695664  
 H 1.28705263 -6.42731905 -0.06259604  
 H 1.26757717 -5.10334110 1.15340626  
 H 0.03647325 3.06727386 4.42717695  
 H -0.40665364 4.80951786 4.43938303  
 H 1.23268223 4.28753805 4.92651796  
 H 1.65713084 3.43900800 2.60541654  
 H 2.74133968 -3.71638060 -0.25697190

**L4\*Cm(NO<sub>3</sub>)<sub>3</sub>(Meso)**

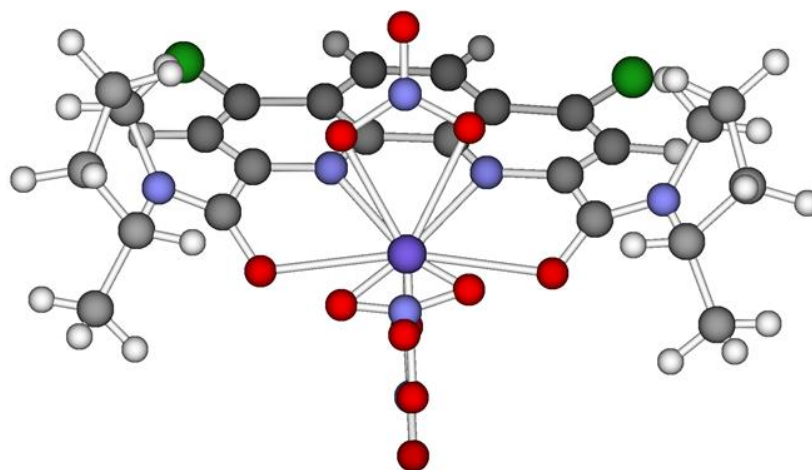

PBE/L1 theoretical level

E= -34318.488033

G= 249.1287 kcal/mol, H= 330.5137 kcal/mol, U= 329.9212 kcal/mol, S= 272.9665 cal/mol at T= 298.150 K

Cl -5.08790731 3.82673526 -1.12333369  
 Cl -4.02333307 -3.21747112 -3.88362813  
 N -1.57672834 1.20582592 0.02181253  
 N -0.17505597 3.94388580 1.75452638  
 N -1.20285332 -1.23867059 -0.94683504  
 N 1.03675890 -3.94534636 -1.42592168  
 O -0.35033149 1.75042868 2.32057214

O 0.48215342 -2.75842357 0.42560339  
C -1.71750045 2.42736006 0.53122967  
C -2.79310226 3.26928306 0.19321406  
H -2.90166235 4.25483847 0.64703071  
C -3.73698759 2.80627751 -0.70877224  
C -3.61413503 1.51536298 -1.28342021  
C -4.52897739 0.93979961 -2.21829987  
H -5.39307976 1.52915537 -2.52952838  
C -4.33782053 -0.32079601 -2.71517611  
H -5.04809427 -0.74623191 -3.42609382  
C -3.21495461 -1.11058140 -2.31900096  
C -2.93993258 -2.42673802 -2.76992631  
C -1.81316519 -3.10191917 -2.33039045  
H -1.61714566 -4.11915588 -2.66993880  
C -0.95658249 -2.45793700 -1.41713727  
C -2.28125811 -0.57436973 -1.38845551  
C -2.48399901 0.76005584 -0.86199242  
C -0.68771738 2.71250606 1.60129547  
C 0.25327542 -3.08095360 -0.75734442  
C -0.16394745 5.00500107 0.72753501  
H -0.84882003 5.82498407 1.01224029  
C 1.29482782 5.47597599 0.75291407  
H 1.91186357 4.76195049 0.18337826  
H 1.41345227 6.48032522 0.31985605  
C 1.63557625 5.40904188 2.24748731  
H 1.22250843 6.28753185 2.77415705  
H 2.71769524 5.37164211 2.44034362  
C 0.94048750 4.12725735 2.74199176  
C 0.43402106 4.19299793 4.17938900  
C 2.27833200 -4.44617462 -0.74779171  
C 1.97603524 -5.51545572 0.29772219

C 3.14522815 -4.93172312 -1.92369211  
C 2.64972019 -4.11810017 -3.12604260  
C 1.13471794 -4.07563543 -2.89361072  
H 2.90633607 -4.56820345 -4.09656620  
H 3.05097651 -3.09208179 -3.09088707  
H 2.97369862 -6.00905371 -2.09517241  
H 4.21493721 -4.78455782 -1.71531940  
Cm 0.40004516 -0.34847957 1.13312352  
N -1.37238169 -1.57344878 3.07691121  
O -0.09882248 -1.45948136 3.27140450  
O -1.80242729 -1.08699918 1.94332397  
O -2.12023163 -2.09238172 3.88113546  
N 3.00682759 -0.40189594 2.43513823  
O 2.14148784 0.53843105 2.65435982  
O 2.61725998 -1.31153262 1.59010208  
O 4.09678841 -0.43279502 2.97215223  
N 1.78793955 0.92042094 -1.15730095  
O 2.32676506 1.45376801 -2.11187029  
O 1.55358756 -0.35150579 -1.11176431  
O 1.40302408 1.59268034 -0.11466331  
H 0.66032630 -5.01552534 -3.23158073  
H 0.64802653 -3.22625780 -3.39259982  
H -0.46772715 4.60290289 -0.24893092  
H 2.92229652 -5.86989594 0.73657066  
H 1.45795584 -6.37612343 -0.15581930  
H 1.36041594 -5.10203981 1.10937667  
H -0.04480207 3.24517417 4.46486044  
H -0.28141066 5.02126741 4.31023979  
H 1.28696322 4.35858679 4.85665560  
H 1.60273421 3.24958324 2.63125801  
H 2.73784876 -3.57309461 -0.25010392



**L4\*La(NO<sub>3</sub>)<sub>3</sub>(Rac)**

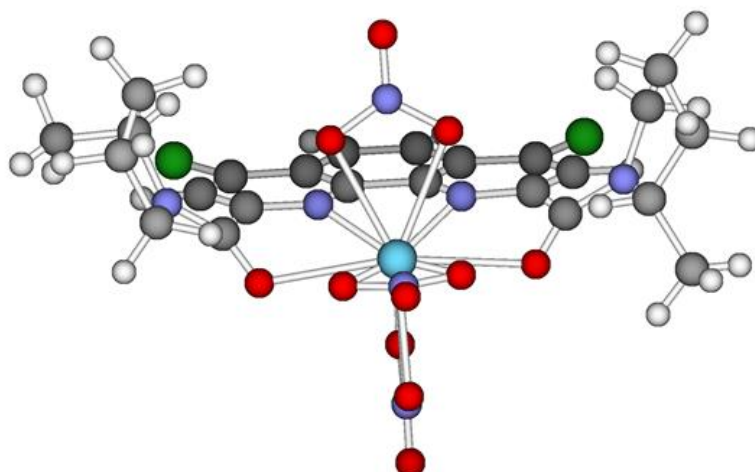

PBE/L1 theoretical level

E= -11557.263659

G= 249.0797 kcal/mol, H= 330.5259 kcal/mol, U= 329.9334 kcal/mol, S= 273.1718 cal/mol at T= 298.150 K

|   |             |             |             |
|---|-------------|-------------|-------------|
| N | -1.61152923 | 1.08691144  | 0.19580403  |
| N | -0.18477350 | 3.83171892  | 1.84855056  |
| N | -1.14714360 | -1.35650766 | -0.77950454 |
| N | 1.20726764  | -3.94107747 | -1.25319290 |
| O | -0.50789082 | 1.70352960  | 2.56770277  |
| O | 0.44961196  | -2.97342753 | 0.65626329  |
| C | -1.78306222 | 2.31272244  | 0.68500513  |
| C | -2.85757732 | 3.13537836  | 0.30021790  |
| H | -2.99751472 | 4.12200022  | 0.74071103  |
| C | -3.76035929 | 2.65167880  | -0.63174844 |
| C | -3.59249735 | 1.36316204  | -1.19921720 |
| C | -4.45585060 | 0.77950251  | -2.17665792 |
| H | -5.31643581 | 1.35580719  | -2.52020335 |
| C | -4.21621656 | -0.46990266 | -2.67850542 |
| H | -4.88343000 | -0.90076441 | -3.42676616 |
| C | -3.09393406 | -1.23959506 | -2.24329209 |
| C | -2.76673985 | -2.53698087 | -2.71384311 |

C -1.64456165 -3.19599843 -2.24092031  
H -1.40124130 -4.19678688 -2.59880567  
C -0.85285103 -2.55784917 -1.26788878  
C -2.21693444 -0.70126504 -1.25914896  
C -2.46980762 0.62509310 -0.72850871  
C -0.77819258 2.62815762 1.77552485  
C 0.33150926 -3.18884087 -0.56606400  
C -0.12395992 4.84946966 0.76757485  
C -0.91474420 6.11444569 1.11778700  
C 1.39376318 5.09417439 0.67480874  
H 1.85160899 4.25875330 0.12051120  
H 1.63027132 6.04035950 0.16541614  
C 1.84658480 5.06279802 2.14515281  
H 1.67915249 6.03714228 2.63078165  
H 2.91414452 4.81807852 2.24553537  
C 0.96997684 3.96897864 2.77930999  
C 2.43035936 -4.43605614 -0.53838247  
C 3.41506791 -4.71972704 -1.68768299  
C 2.94122767 -3.81234908 -2.83051562  
C 1.41563463 -3.90933180 -2.71505618  
H 3.30278945 -4.12757444 -3.82055545  
H 3.24969459 -2.76941991 -2.65017200  
H 3.34575534 -5.78038597 -1.98749948  
H 4.45165825 -4.51840544 -1.37984669  
La 0.33289981 -0.51956403 1.49781549  
N -1.75579643 -1.69875634 3.27217007  
O -0.51880020 -1.61197329 3.63574195  
O -2.02527380 -1.23443198 2.07944965  
O -2.61920357 -2.17776465 3.98088789  
N 2.87748957 -0.62923187 3.05158448  
O 2.05849195 0.37790513 3.12602472

O 2.49943352 -1.59249532 2.26472378  
O 3.92349386 -0.66531616 3.66988158  
N 1.90941834 0.74497366 -0.78643495  
O 2.49916744 1.25643837 -1.72447169  
O 1.74225998 -0.53570932 -0.69190240  
O 1.40647829 1.45308948 0.17739320  
H 1.04415882 -4.84202290 -3.17825699  
Cl -5.11182070 3.64810443 -1.09920192  
Cl -3.77672744 -3.32279658 -3.89717412  
H 0.61572784 4.21921682 3.79162741  
C 2.13228369 -5.63756514 0.35301033  
H 1.47861195 2.99282503 2.83700728  
H 0.89532942 -3.05181837 -3.16366696  
H -0.50896776 4.40132380 -0.16155882  
H -0.50935441 6.60313606 2.01687241  
H -1.97710001 5.89771605 1.30864704  
H -0.85761392 6.82940626 0.28187910  
H 1.42437828 -5.36480379 1.14902902  
H 3.06591082 -5.97402096 0.83150196  
H 1.72030354 -6.47411394 -0.23469055  
H 2.78599048 -3.59936690 0.08943189

PBE0/L1 theoretical level

E= -11557.210822

N -1.60787606 1.07044375 0.20108739  
N -0.16902739 3.78519535 1.82431066  
N -1.15041018 -1.35686851 -0.76705325  
N 1.20036495 -3.89384484 -1.23145866  
O -0.48284695 1.67757416 2.53030443  
O 0.42359215 -2.95996976 0.65961534  
C -1.76963031 2.28393841 0.68226582  
C -2.82894516 3.10862899 0.29660624

H -2.96351814 4.08917809 0.73130435  
C -3.72333694 2.63252068 -0.63065535  
C -3.55967832 1.35203600 -1.19118834  
C -4.41740608 0.77595145 -2.17128634  
H -5.26755571 1.35076594 -2.51722598  
C -4.18122482 -0.46107411 -2.66866159  
H -4.84057474 -0.88448012 -3.41618323  
C -3.06733179 -1.23143923 -2.22835088  
C -2.74200797 -2.51774979 -2.69954848  
C -1.63326752 -3.17475843 -2.22498345  
H -1.38739073 -4.16622019 -2.58249617  
C -0.85658556 -2.54332972 -1.25030100  
C -2.20673776 -0.70306778 -1.24681878  
C -2.45655704 0.61551261 -0.71904707  
C -0.75807291 2.59666777 1.75653124  
C 0.32181183 -3.16824198 -0.55039102  
C -0.13139287 4.80490351 0.76375788  
C -0.91344976 6.05498695 1.14185572  
C 1.37185884 5.06166887 0.65083486  
H 1.82649362 4.24363422 0.08410463  
H 1.59134066 6.00917578 0.15330628  
C 1.84327245 5.01663160 2.10392022  
H 1.67834258 5.97756863 2.59888315  
H 2.90569878 4.77873325 2.18615079  
C 0.98675483 3.91809344 2.73404932  
C 2.41192603 -4.37895966 -0.52047628  
C 3.39174199 -4.66006899 -1.66007006  
C 2.92661095 -3.74986696 -2.79015017  
C 1.41065300 -3.84520507 -2.68034101  
H 3.28821301 -4.05594921 -3.77420616  
H 3.23364615 -2.71642184 -2.60130310

H 3.31645155 -5.71074724 -1.96445823  
H 4.42135143 -4.46802473 -1.35110533  
La 0.32232383 -0.53764647 1.50517929  
N -1.77819276 -1.67140722 3.25833988  
O -0.56769013 -1.59174216 3.62660646  
O -2.02815676 -1.22938097 2.08377099  
O -2.63735104 -2.12871647 3.95544171  
N 2.87557817 -0.64773548 3.00551748  
O 2.09241843 0.35513341 3.06602407  
O 2.47810364 -1.60565937 2.26688457  
O 3.91548848 -0.68438792 3.59806800  
N 1.86422205 0.69409579 -0.79297543  
O 2.42885017 1.18721592 -1.73251319  
O 1.71992481 -0.56163734 -0.67628837  
O 1.36983979 1.40035486 0.14046723  
H 1.04284728 -4.76453161 -3.15280557  
Cl -5.05472469 3.62713647 -1.10170579  
Cl -3.73439884 -3.28910065 -3.88437128  
H 0.64834625 4.15571833 3.74571109  
C 2.11949682 -5.57536077 0.36257166  
H 1.50216901 2.95450377 2.77363777  
H 0.90016782 -2.98716426 -3.11971688  
H -0.52446824 4.37377834 -0.16024072  
H -0.49546868 6.52644253 2.03488779  
H -1.96439338 5.83737659 1.34860814  
H -0.87128597 6.77755308 0.32202244  
H 1.41778541 -5.30889034 1.15539193  
H 3.04802632 -5.91156721 0.83310699  
H 1.70910954 -6.40309763 -0.22454078  
H 2.76613259 -3.54880500 0.10179243

## L4\*Nd(NO<sub>3</sub>)<sub>3</sub>(Rac)

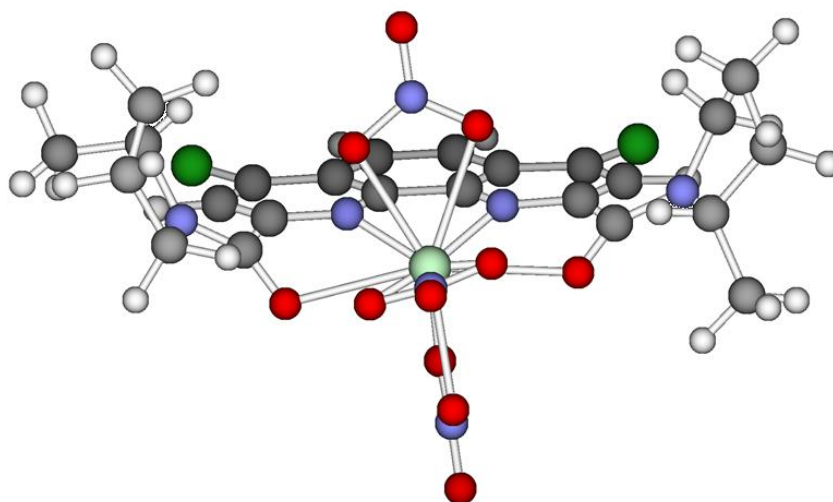

PBE\L1 theoretical level

E= -12688.657934

G= 249.8541 kcal/mol, H= 330.4378 kcal/mol, U= 329.8453 kcal/mol, S= 270.2788 cal/mol at T= 298.150 K

|   |             |             |             |
|---|-------------|-------------|-------------|
| N | -1.56791520 | 1.11246705  | 0.15433341  |
| N | -0.22738720 | 3.83964944  | 1.92294705  |
| N | -1.09371388 | -1.32525837 | -0.80994129 |
| N | 1.20790923  | -4.00298643 | -1.24400926 |
| O | -0.53662419 | 1.67893302  | 2.55176234  |
| O | 0.61171156  | -2.80516720 | 0.58656716  |
| C | -1.75976956 | 2.33161283  | 0.65716475  |
| C | -2.83369708 | 3.14991832  | 0.26471177  |
| H | -2.98527288 | 4.13155460  | 0.71228355  |
| C | -3.72335958 | 2.66796374  | -0.68134403 |
| C | -3.54679418 | 1.38110101  | -1.24818242 |
| C | -4.40639448 | 0.79085666  | -2.22490430 |
| H | -5.26632929 | 1.36459100  | -2.57433939 |
| C | -4.16611242 | -0.46288472 | -2.71593070 |
| H | -4.83242512 | -0.90050602 | -3.46111441 |
| C | -3.04530430 | -1.22906744 | -2.27161503 |
| C | -2.72339749 | -2.53495407 | -2.71936631 |

C -1.59911680 -3.18620706 -2.24035215  
H -1.36596453 -4.19526911 -2.57981968  
C -0.79632068 -2.53154612 -1.28713357  
C -2.16601682 -0.67894876 -1.29603863  
C -2.42134547 0.64805597 -0.77529514  
C -0.79298973 2.62788129 1.78472614  
C 0.40542537 -3.13613605 -0.59690207  
C -0.14402035 4.89280939 0.87858617  
C -0.96431559 6.13526201 1.24183834  
C 1.37231159 5.16062689 0.84593838  
H 1.86055815 4.35039616 0.28051975  
H 1.61233020 6.12638283 0.37639278  
C 1.77609861 5.08613014 2.32907343  
H 1.58274102 6.04293966 2.83930945  
H 2.84231758 4.84831524 2.45658255  
C 0.89071190 3.96392107 2.89914274  
C 2.42831564 -4.50427818 -0.53046805  
C 3.32387352 -5.00323200 -1.67881167  
C 2.86604881 -4.19537020 -2.89949799  
C 1.34568703 -4.14107990 -2.70775676  
H 3.14521265 -4.65403795 -3.85975170  
H 3.27434301 -3.17207289 -2.86186361  
H 3.14972305 -6.08058739 -1.84741449  
H 4.38868570 -4.86209393 -1.44261515  
Nd 0.35938379 -0.40678206 1.34809208  
N -1.54629111 -1.74347973 3.09504962  
O -0.29173103 -1.61615288 3.38568282  
O -1.90006459 -1.22956312 1.95118904  
O -2.33927441 -2.30001068 3.82773781  
N 2.89051080 -0.36662820 2.79322171  
O 1.92917764 0.46140084 3.05656433

O 2.62513876 -1.22674239 1.85429132  
O 3.95761299 -0.34210974 3.37372303  
N 1.85191810 0.95458794 -0.82839036  
O 2.45861936 1.53564537 -1.71202242  
O 1.55463958 -0.29844451 -0.89318067  
O 1.45267212 1.56573975 0.24899100  
H 0.87509602 -5.07932711 -3.05583572  
Cl -5.07336426 3.66195321 -1.15940690  
Cl -3.74255967 -3.34279370 -3.88104367  
H 0.49607259 4.18291903 3.90377975  
C 2.09410906 -5.56502676 0.51426619  
H 1.40763187 2.99161935 2.94812202  
H 0.87871104 -3.29124260 -3.22457623  
H -0.49077171 4.47042036 -0.07736411  
H -0.59983748 6.59687328 2.17223334  
H -2.03017759 5.89930248 1.38453627  
H -0.88541323 6.87982130 0.43400115  
H 1.45570612 -5.14509773 1.30469596  
H 3.02649689 -5.91840696 0.98287445  
H 1.58737469 -6.42785549 0.05214185  
H 2.87919641 -3.63030386 -0.02678502

**L4\*Eu(NO<sub>3</sub>)<sub>3</sub>(Rac)**

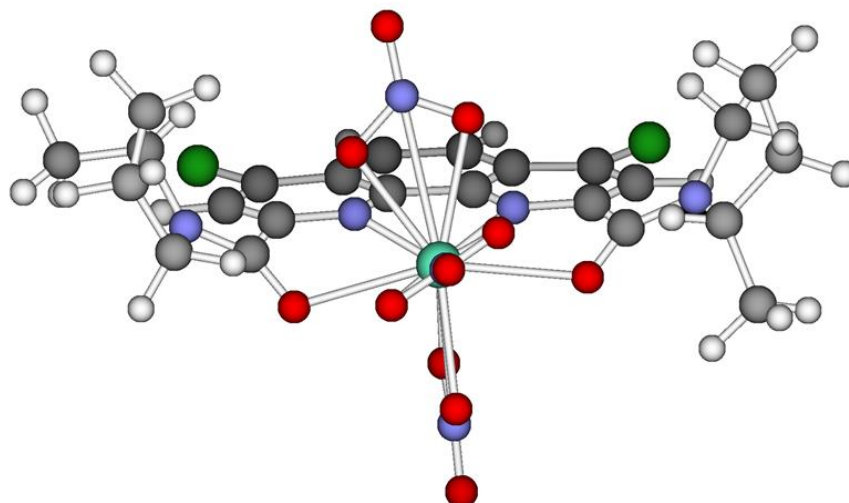



PBE/L1 theoretical level

E= -13909.655372

G= 250.4028 kcal/mol, H= 330.3367 kcal/mol, U= 329.7443 kcal/mol, S= 268.0998 cal/mol at T= 298.150 K

|   |             |             |             |
|---|-------------|-------------|-------------|
| N | -1.52827489 | 1.11064613  | 0.11755731  |
| N | -0.25017777 | 3.82453585  | 1.97074723  |
| N | -1.08105659 | -1.34973907 | -0.82109892 |
| N | 1.19874108  | -4.05410862 | -1.20594966 |
| O | -0.51322955 | 1.63665128  | 2.53193402  |
| O | 0.60289377  | -2.81761169 | 0.60069531  |
| C | -1.73326683 | 2.31725073  | 0.64409882  |
| C | -2.81450486 | 3.13105559  | 0.25887901  |
| H | -2.98016214 | 4.10301018  | 0.72252196  |
| C | -3.68989086 | 2.65948987  | -0.70469511 |
| C | -3.50350785 | 1.38039958  | -1.28705621 |
| C | -4.35458040 | 0.79784733  | -2.27598214 |
| H | -5.20983076 | 1.37541783  | -2.63052821 |
| C | -4.11377382 | -0.45411098 | -2.77092910 |
| H | -4.77375984 | -0.88559371 | -3.52517533 |
| C | -3.00452018 | -1.22906673 | -2.31293106 |
| C | -2.69247627 | -2.54089618 | -2.75118732 |
| C | -1.58496118 | -3.20641208 | -2.25385022 |
| H | -1.36182582 | -4.21968699 | -2.58704209 |
| C | -0.78921950 | -2.55987954 | -1.28867567 |
| C | -2.13235259 | -0.68575484 | -1.32736969 |
| C | -2.37967849 | 0.64678949  | -0.81305140 |
| C | -0.78053522 | 2.59986711  | 1.79035366  |
| C | 0.40099409  | -3.16844082 | -0.57795697 |
| C | -0.16537499 | 4.89639330  | 0.94535261  |
| C | -1.00620651 | 6.12222528  | 1.31799912  |
| C | 1.34754503  | 5.18474388  | 0.93450868  |
| H | 1.85265434  | 4.39228439  | 0.35929206  |

H 1.57885182 6.16335392 0.48766249  
C 1.73549414 5.08624268 2.42033553  
H 1.52292860 6.02955818 2.94789886  
H 2.80319834 4.85976362 2.55536151  
C 0.85874891 3.94116426 2.95719433  
C 2.40857458 -4.55908394 -0.47660145  
C 3.29890823 -5.10064793 -1.60953283  
C 2.86026192 -4.31357861 -2.85053802  
C 1.34057999 -4.22573662 -2.66618204  
H 3.13334322 -4.80050755 -3.79851508  
H 3.28936815 -3.29827070 -2.83681130  
H 3.10587335 -6.17826080 -1.75341821  
H 4.36521244 -4.97304487 -1.37272537  
Eu 0.36669698 -0.40405372 1.24817431  
N -1.52734756 -1.63917816 3.07465219  
O -0.27029091 -1.50103903 3.33828163  
O -1.90882111 -1.16208339 1.93242157  
O -2.30060840 -2.18044829 3.84422040  
N 3.02917647 -0.35823214 2.42056394  
O 2.03205800 0.25154316 2.96128488  
O 2.75338674 -1.00819731 1.33195698  
O 4.15301991 -0.32939985 2.89038444  
N 1.73716021 1.22521865 -0.80987036  
O 2.30744529 1.88395023 -1.66650844  
O 1.31818771 0.02287780 -1.03244197  
O 1.50052440 1.68793106 0.37307319  
H 0.85383826 -5.16225910 -2.99600554  
Cl -5.04002571 3.65345716 -1.18249345  
Cl -3.70567203 -3.33981180 -3.92399883  
H 0.45566919 4.13157988 3.96435165  
C 2.05313897 -5.59031582 0.59058613

|   |             |             |             |
|---|-------------|-------------|-------------|
| H | 1.38687289  | 2.97429156  | 2.98488474  |
| H | 0.89221954  | -3.37877369 | -3.20371532 |
| H | -0.49407148 | 4.48661852  | -0.02243823 |
| H | -0.65501249 | 6.57739687  | 2.25654364  |
| H | -2.06967998 | 5.86983728  | 1.45037234  |
| H | -0.93268967 | 6.87833929  | 0.52009267  |
| H | 1.41799116  | -5.14317417 | 1.36855114  |
| H | 2.97792578  | -5.94862461 | 1.07039583  |
| H | 1.53436971  | -6.45495319 | 0.14570326  |
| H | 2.87353277  | -3.68075562 | 0.00638773  |

**L4\*Lu(NO<sub>3</sub>)<sub>3</sub>(Rac)**

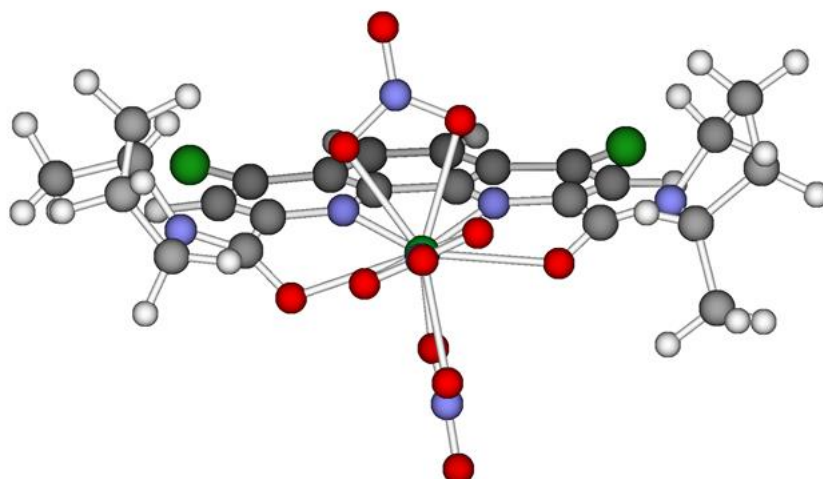

PBE/L1 theoretical level

E= -17632.060677

G= 252.7284 kcal/mol, H= 331.0392 kcal/mol, U= 330.4467 kcal/mol, S= 262.6558 cal/mol at T= 298.150 K

|   |             |             |             |
|---|-------------|-------------|-------------|
| N | -1.49641395 | 1.12728274  | 0.03337539  |
| N | -0.25430170 | 3.78705239  | 2.00620008  |
| N | -1.05358243 | -1.29574442 | -0.91745168 |
| N | 1.17985570  | -4.06736851 | -1.19094229 |
| O | -0.44817808 | 1.55912316  | 2.39401627  |
| O | 0.70486176  | -2.60822082 | 0.47128952  |
| C | -1.69702184 | 2.32909966  | 0.57306790  |

C -2.77306056 3.15240598 0.19510880  
H -2.93565536 4.11972713 0.66892165  
C -3.65433455 2.69488454 -0.77128112  
C -3.47844243 1.41855097 -1.36103010  
C -4.33835697 0.83551025 -2.34312248  
H -5.19400215 1.41546226 -2.69310069  
C -4.10925531 -0.42137852 -2.83367419  
H -4.78025389 -0.85312015 -3.57817149  
C -2.99921036 -1.19993412 -2.38219357  
C -2.69383478 -2.51951170 -2.80022669  
C -1.58200955 -3.17901349 -2.30119967  
H -1.37348008 -4.20129299 -2.61485052  
C -0.76666069 -2.51324153 -1.36451030  
C -2.11421371 -0.64920080 -1.41474879  
C -2.35453773 0.68041933 -0.89704710  
C -0.74846768 2.56933045 1.72783649  
C 0.43846387 -3.08230233 -0.64945233  
C -0.21626873 4.94826698 1.08137619  
C -1.10604584 6.10030174 1.56074488  
C 1.28368556 5.29761600 1.10283852  
H 1.82139456 4.58025694 0.46200034  
H 1.47620022 6.31924772 0.74205011  
C 1.67501247 5.08563471 2.57587743  
H 1.42192841 5.96997356 3.18174148  
H 2.75134277 4.89440203 2.69505143  
C 0.84909314 3.86068010 3.00565314  
C 2.39073467 -4.53481722 -0.43762147  
C 3.21385193 -5.25978231 -1.51726663  
C 2.77157831 -4.61293602 -2.83537745  
C 1.26500499 -4.42031813 -2.62178588  
H 2.98623037 -5.22958946 -3.72083306

H 3.25155234 -3.62911868 -2.96411347  
H 2.96343422 -6.33513308 -1.51751995  
H 4.29259634 -5.16018200 -1.32868791  
Lu 0.43848929 -0.30485907 1.09804678  
N -1.13665617 -1.68322146 2.93134665  
O 0.13010874 -1.48969376 3.09505796  
O -1.62132359 -1.16883206 1.83320796  
O -1.82635140 -2.29175830 3.72367549  
N 2.98390722 -0.15804932 2.28696609  
O 2.00440073 0.58047366 2.68810368  
O 2.67472172 -0.96329302 1.30936217  
O 4.09876966 -0.11220355 2.76916885  
N 1.70287323 1.13285780 -1.00521779  
O 2.24705482 1.76388860 -1.89281285  
O 1.37855864 -0.11071896 -1.12079477  
O 1.39273047 1.66714776 0.14015001  
H 0.72035939 -5.36140442 -2.82367301  
Cl -4.99945068 3.70050812 -1.23713887  
Cl -3.72261477 -3.33716822 -3.94645452  
H 0.43489915 3.94530153 4.02250195  
C 2.02753234 -5.40393782 0.76301223  
H 1.41849208 2.91786122 2.95149016  
H 0.84558088 -3.61976981 -3.24666500  
H -0.52705985 4.61261368 0.07989556  
H -0.77280378 6.48193073 2.53787041  
H -2.15810585 5.79349756 1.66840553  
H -1.06402230 6.92785931 0.83508301  
H 1.45175648 -4.82790661 1.50138438  
H 2.95263076 -5.75137711 1.25004733  
H 1.44609702 -6.28620195 0.44939187  
H 2.91019154 -3.62656713 -0.08235258

**L4\*Am(NO<sub>3</sub>)<sub>3</sub>(Rac)**

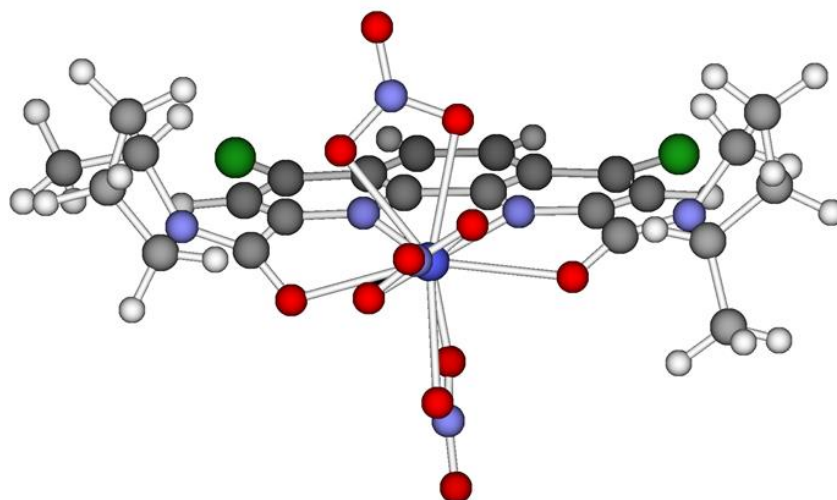

PBE/L1 theoretical level

E= -33482.167024

G= 250.8120 kcal/mol, H= 330.1333 kcal/mol, U= 329.5408 kcal/mol, S= 266.0449 cal/mol at T= 298.150 K

|   |             |             |             |
|---|-------------|-------------|-------------|
| N | -1.47323287 | 1.13153386  | 0.07039306  |
| N | -0.26949552 | 3.84230423  | 2.01204181  |
| N | -1.01404274 | -1.32636368 | -0.87502611 |
| N | 1.18614173  | -4.13445902 | -1.20783365 |
| O | -0.41465610 | 1.61768854  | 2.43837452  |
| O | 0.75001085  | -2.70284534 | 0.49557874  |
| C | -1.68944585 | 2.33949399  | 0.60772544  |
| C | -2.76859498 | 3.14917707  | 0.21371645  |
| H | -2.94728208 | 4.11533260  | 0.68387574  |
| C | -3.63042402 | 2.68348694  | -0.76429880 |
| C | -3.43876290 | 1.40455782  | -1.35117698 |
| C | -4.28356409 | 0.82435381  | -2.34091544 |
| H | -5.13701868 | 1.40193748  | -2.69937301 |
| C | -4.04533863 | -0.43529361 | -2.82859135 |
| H | -4.70662355 | -0.86966228 | -3.57988071 |
| C | -2.94569707 | -1.21029329 | -2.36232471 |
| C | -2.64547539 | -2.53366423 | -2.78177071 |

C -1.54658544 -3.20290279 -2.27654958  
H -1.34362996 -4.22616053 -2.58983517  
C -0.73158586 -2.55188179 -1.32942700  
C -2.06866288 -0.66390955 -1.37961686  
C -2.31788421 0.66877860 -0.86877114  
C -0.74716443 2.61023760 1.75245523  
C 0.45956957 -3.14950562 -0.63884968  
C -0.24582940 4.98996592 1.06945419  
C -1.15811861 6.13434553 1.52525830  
C 1.24688089 5.36859751 1.09265649  
H 1.80327034 4.65368366 0.46515483  
H 1.42148721 6.38908052 0.71981132  
C 1.63315380 5.18402147 2.57034063  
H 1.35236490 6.06799078 3.16443706  
H 2.71297836 5.02165794 2.70067596  
C 0.83357990 3.94468451 3.00705671  
C 2.38007665 -4.65541887 -0.46528965  
C 3.19177842 -5.36543465 -1.56315994  
C 2.78096199 -4.65655470 -2.85906506  
C 1.27819169 -4.43306208 -2.65141940  
H 2.98875999 -5.24401855 -3.76573920  
H 3.28867435 -3.68193722 -2.94524145  
H 2.90829921 -6.43174744 -1.60596406  
H 4.27119970 -5.30654716 -1.36151814  
Am 0.43340153 -0.34425598 1.12358117  
N -1.35694206 -1.63065028 3.02445912  
O -0.10138648 -1.39587700 3.25498486  
O -1.77708781 -1.23096907 1.86306298  
O -2.07992959 -2.18017960 3.83006430  
N 3.13538837 -0.23764768 2.19560695  
O 2.11812305 0.30215156 2.78888106

O 2.84538245 -0.86164463 1.09338343  
O 4.26691246 -0.16541804 2.63038802  
N 1.74802339 1.34876812 -0.91857928  
O 2.30241704 2.01212883 -1.77614188  
O 1.28703022 0.15815358 -1.15364325  
O 1.56019008 1.77793252 0.28629631  
H 0.71229243 -5.35094786 -2.89684176  
Cl -4.97780657 3.67802596 -1.25135744  
Cl -3.67254353 -3.34063435 -3.93781734  
H 0.42335907 4.02155304 4.02629137  
C 1.98881233 -5.55439663 0.70435518  
H 1.42407501 3.01566529 2.95379639  
H 0.88305402 -3.59830284 -3.24697423  
H -0.54674280 4.63310242 0.07215568  
H -0.83627564 6.53798008 2.49740362  
H -2.20509887 5.81130028 1.63300467  
H -1.12678719 6.95018005 0.78588706  
H 1.41602635 -4.99236727 1.45576012  
H 2.90132165 -5.93747282 1.18848717  
H 1.39194179 -6.41325092 0.35700527  
H 2.92458463 -3.77417421 -0.08086818

**L4\*Cm(NO<sub>3</sub>)<sub>3</sub>(Rac)**

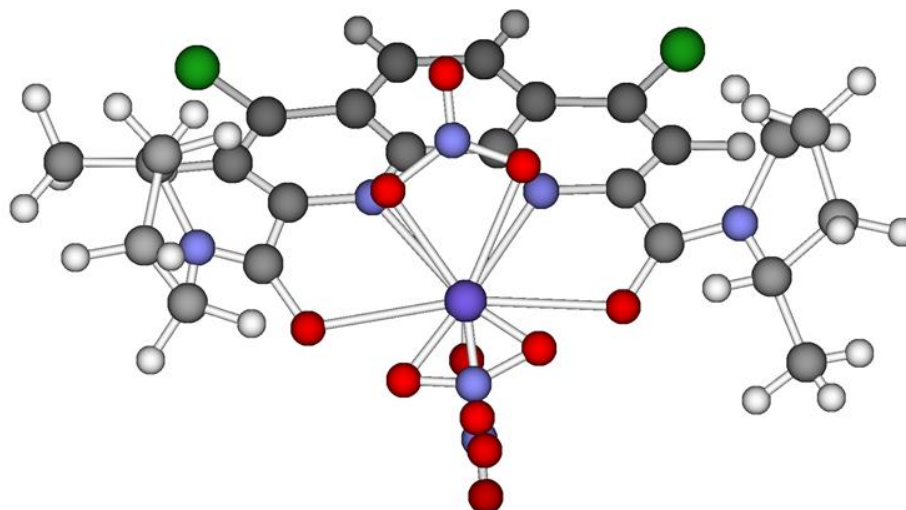



PBE/L1 theoretical level

E= -34318.485149

G= 249.8737 kcal/mol, H= 330.5476 kcal/mol, U= 329.9552 kcal/mol, S= 270.5818 cal/mol at T= 298.150 K

|   |             |             |             |
|---|-------------|-------------|-------------|
| N | -1.56577730 | 1.11511827  | 0.12199934  |
| N | -0.22679725 | 3.82629347  | 1.92214906  |
| N | -1.10057771 | -1.31913757 | -0.84314448 |
| N | 1.19539523  | -4.00147247 | -1.23317742 |
| O | -0.50913668 | 1.64995670  | 2.50331497  |
| O | 0.56986451  | -2.79914141 | 0.58425474  |
| C | -1.75707555 | 2.32932639  | 0.63621610  |
| C | -2.83414745 | 3.14850211  | 0.25223821  |
| H | -2.98857379 | 4.12622929  | 0.70762163  |
| C | -3.72269011 | 2.67387128  | -0.69840193 |
| C | -3.54595923 | 1.39119709  | -1.27590895 |
| C | -4.40478373 | 0.80510205  | -2.25622296 |
| H | -5.26491928 | 1.37990665  | -2.60341120 |
| C | -4.16601610 | -0.44758138 | -2.75168967 |
| H | -4.83370113 | -0.88185620 | -3.49762034 |
| C | -3.04787850 | -1.21792972 | -2.30739450 |
| C | -2.72900033 | -2.52635479 | -2.75136232 |
| C | -1.61170661 | -3.18388176 | -2.26407123 |
| H | -1.38361764 | -4.19584656 | -2.59881902 |
| C | -0.80924857 | -2.53000379 | -1.30958903 |
| C | -2.16855335 | -0.67066312 | -1.33104420 |
| C | -2.42097712 | 0.65656453  | -0.80673730 |
| C | -0.78314841 | 2.61414957  | 1.75963008  |
| C | 0.38309154  | -3.13429713 | -0.60252458 |
| C | -0.16161989 | 4.90435076  | 0.90205473  |
| C | -0.99415702 | 6.12836075  | 1.29835463  |
| C | 1.35139585  | 5.19014692  | 0.86724246  |
| H | 1.84529972  | 4.39893436  | 0.28030583  |

H 1.57755125 6.16928244 0.41894224  
C 1.76472998 5.08542728 2.34578991  
H 1.55902576 6.02602053 2.88064218  
H 2.83496070 4.86097670 2.46224070  
C 0.90025908 3.93524122 2.89068532  
C 2.40861464 -4.49643469 -0.50185436  
C 3.31556392 -5.00508308 -1.63690376  
C 2.87111616 -4.20692587 -2.86905861  
C 1.34871709 -4.15020514 -2.69441724  
H 3.15993643 -4.67417240 -3.82228446  
H 3.27971482 -3.18373370 -2.83581686  
H 3.14255857 -6.08374500 -1.79820812  
H 4.37779522 -4.86216831 -1.39088678  
Cm 0.37016290 -0.40917599 1.31989992  
N -1.45459807 -1.74353468 3.13780546  
O -0.19450574 -1.60399699 3.39412427  
O -1.84657383 -1.22762001 2.00332308  
O -2.22298193 -2.31082749 3.88798642  
N 2.91975212 -0.39049619 2.73381376  
O 1.99229109 0.48459274 2.96797991  
O 2.61529994 -1.27463043 1.82870293  
O 3.99025822 -0.38658881 3.30928636  
N 1.85051358 0.95249373 -0.86112440  
O 2.43430614 1.52540493 -1.76537311  
O 1.59937286 -0.31508473 -0.88657165  
O 1.43076193 1.58042717 0.19683161  
H 0.88086760 -5.09072495 -3.03973651  
Cl -5.07292557 3.67043543 -1.16890347  
Cl -3.74619603 -3.33046627 -3.91679192  
H 0.51312286 4.11798573 3.90532327  
C 2.06356287 -5.54814434 0.54838187

H 1.43166101 2.96932673 2.90408444  
H 0.88826245 -3.30335999 -3.22189951  
H -0.50812030 4.49942923 -0.06149057  
H -0.62907374 6.57326412 2.23655033  
H -2.05615997 5.87652874 1.44287896  
H -0.92954725 6.89174271 0.50695366  
H 1.42130506 -5.12017441 1.33125079  
H 2.99181366 -5.90032578 1.02581358  
H 1.55778575 -6.41308165 0.08915222  
H 2.85405493 -3.61772299 -0.00138486

### Nitrates

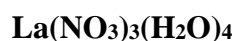

PBE/L1 theoretical level

E= -9642.097318

G= 53.3819 kcal/mol, H= 105.8898 kcal/mol, U= 105.2973 kcal/mol, S= 176.1123 cal/mol at T= 298.150 K

La -0.01745072 0.03941465 -0.08009092  
N -2.88875771 0.66897988 -0.56789005  
O -1.92837203 1.52223504 -0.78965306  
O -4.05084801 0.92287028 -0.77512562  
O -2.48932242 -0.48393327 -0.10402510  
N 0.24982727 -2.03345084 -2.26907063  
O 0.46912551 -2.31057143 -1.00930166  
O -0.07948777 -0.79881620 -2.50240612  
O 0.34689739 -2.86435509 -3.14117336  
N 0.09314170 2.14140987 2.08958840  
O 0.72087282 2.24467993 0.95873511  
O 0.02993391 3.04302406 2.89206719  
O -0.47006425 0.97196674 2.30463123  
O 0.69057828 1.79106164 -1.94979513  
H -0.02730745 2.45715356 -1.97258639  
H 0.55669630 1.24782395 -2.75659680

O 1.56816590 -0.82050055 2.01577806  
H 1.02049017 -0.21734004 2.58009863  
H 1.15512693 -1.69574893 2.17421746  
O 2.59965801 0.17230313 -0.40205047  
H 2.86960483 1.10862684 -0.48422387  
H 2.88411617 -0.11630398 0.49250901  
O -0.82267028 -2.17092156 1.33470869  
H -0.68676341 -2.76558900 0.56091714  
H -1.79319084 -2.05401897 1.40073824  
PBE0/L1 theoretical level  
E= -9641.90411563  
La -0.02973660 -0.01643320 -0.05039048  
N -2.85563040 0.68312019 -0.61486340  
O -1.89039898 1.49601591 -0.80304956  
O -3.98921037 0.96606022 -0.84288192  
O -2.50848508 -0.46106812 -0.16331235  
N 0.30149275 -2.05739784 -2.21207833  
O 0.38962287 -2.35492110 -0.97064960  
O 0.05274607 -0.83215630 -2.45374012  
O 0.44143066 -2.86829662 -3.07335567  
N 0.03753816 2.06705070 2.10004807  
O 0.66495377 2.17938662 0.99891722  
O -0.03150741 2.95142961 2.89578414  
O -0.51345420 0.92351210 2.29911208  
O 0.72722709 1.77785838 -1.87621176  
H 0.11463277 2.52475595 -1.81691980  
H 0.52906656 1.33517170 -2.71527171  
O 1.57842588 -0.80243385 1.98836398  
H 1.00824416 -0.32604322 2.62054205  
H 1.43289626 -1.73700559 2.18709517  
O 2.54031301 0.18323997 -0.49348837

H 2.69439268 1.06862950 -0.85215640  
H 3.00600362 0.12764271 0.35205156  
O -0.94614947 -2.10533190 1.37118721  
H -0.85619795 -2.77988744 0.67843556  
H -1.89821577 -1.94289792 1.44683218

**Nd(NO<sub>3</sub>)<sub>3</sub>(H<sub>2</sub>O)<sub>4</sub>**

PBE/L1 theoretical level

E= -10773.492766

G= 54.2571kcal/mol, H= 105.8958 kcal/mol, U= 105.3034 kcal/mol, S= 173.1973 cal/mol at T= 298.150 K

Nd 0.02021915 0.01166109 -0.08434540  
N -2.78535986 0.60743934 -0.54352832  
O -1.83417118 1.47301483 -0.73809993  
O -3.95070672 0.85009933 -0.74078512  
O -2.36504269 -0.55249572 -0.11462208  
N 0.16858573 -1.96648109 -2.26481867  
O 0.39970762 -2.27045560 -1.01441967  
O -0.09988253 -0.71291602 -2.46538568  
O 0.20339151 -2.78575873 -3.15106010  
N -0.01843936 2.11770582 1.97429729  
O 0.67321289 2.20859909 0.88139814  
O -0.15231565 3.03387260 2.75060225  
O -0.56242400 0.93933868 2.17814398  
O 0.79025263 1.77881324 -1.85691988  
H 0.16008550 2.52367067 -1.77821743  
H 0.54644805 1.31811285 -2.68792892  
O 1.56711614 -0.78899258 2.01599741  
H 1.03195083 -0.17503770 2.57482982  
H 1.08447707 -1.63791442 2.13131595  
O 2.55918097 0.07194296 -0.42564288  
H 2.80818582 1.00372231 -0.58892435  
H 2.84546351 -0.14286901 0.48918524

O -0.73587757 -2.16449833 1.38373792  
H -0.65855688 -2.74720025 0.59370673  
H -1.69550073 -1.99337339 1.48148346

**Eu(NO<sub>3</sub>)<sub>3</sub>(H<sub>2</sub>O)<sub>4</sub>**

PBE/L1 theoretical level

E= -11994.497997

G= 54.1542 kcal/mol, H= 105.7015 kcal/mol, U= 105.1090 kcal/mol, S= 172.8905 cal/mol at T= 298.150 K

N -2.74106860 0.22598195 0.01776200  
O -2.17184520 1.22799683 -0.56652075  
O -3.93982434 0.10236165 0.11109148  
O -1.90453625 -0.65733540 0.50886905  
N -0.01424715 -1.70417202 -2.21535850  
O 0.42451546 -1.89757991 -1.00594270  
O -0.35052702 -0.47876206 -2.47153473  
O -0.10478565 -2.59533930 -3.02917290  
N 0.14335951 2.76792932 1.53033042  
O 0.28633529 2.85805821 0.24475501  
O 0.13983190 3.73357582 2.25992537  
O 0.01132500 1.55293941 1.96798527  
O 1.01058364 1.84728324 -2.15551949  
H 0.76053965 2.78958297 -2.08212161  
H 0.62084270 1.50895333 -2.98714590  
O 0.88793862 -1.04726923 1.71804178  
H 0.60404843 -0.57602167 2.52639318  
H 0.33954483 -1.91536725 1.67790461  
O 2.59570003 0.20145746 0.12479670  
H 3.29220533 0.84873402 0.33680367  
H 2.48089361 -0.39127678 0.90928328  
O -0.66292977 -3.10786319 1.28486013  
H -0.34402812 -3.17482162 0.35548779  
H -1.48381722 -2.57699943 1.17517054

**Lu(NO<sub>3</sub>)<sub>3</sub>(H<sub>2</sub>O)<sub>4</sub>**

PBE/L1 theoretical level

E= -15716.911897

G= 56.7595 kcal/mol, H= 106.3943 kcal/mol, U= 105.8018 kcal/mol, S= 166.4759 cal/mol at T= 298.150 K

|    |             |             |             |
|----|-------------|-------------|-------------|
| Lu | 0.12668742  | 0.35841832  | -0.20042945 |
| N  | -2.62425399 | 0.35054472  | -0.29543921 |
| O  | -1.90557230 | 1.30995774  | -0.79433483 |
| O  | -3.82842660 | 0.34133789  | -0.30528688 |
| O  | -1.90943384 | -0.62477821 | 0.22348505  |
| N  | 0.17094085  | -1.78774416 | -2.02344322 |
| O  | 0.55622333  | -1.91212308 | -0.77958149 |
| O  | -0.18877026 | -0.58001471 | -2.33218980 |
| O  | 0.14686915  | -2.71088982 | -2.79986167 |
| N  | 0.24010830  | 2.45321631  | 1.70221746  |
| O  | 1.03164172  | 2.33433628  | 0.65940946  |
| O  | 0.32507646  | 3.37442040  | 2.47858071  |
| O  | -0.62326503 | 1.49553275  | 1.81062424  |
| O  | 0.73080158  | 1.88078153  | -1.97037554 |
| H  | 0.44796687  | 2.80497503  | -1.82483065 |
| H  | 0.30917731  | 1.57729650  | -2.80044103 |
| O  | 0.77543509  | -0.81970644 | 1.74968612  |
| H  | 0.39504921  | -0.27447397 | 2.47114968  |
| H  | 0.24111941  | -1.70166075 | 1.76875579  |
| O  | 2.51866770  | 0.14566690  | -0.34323007 |
| H  | 2.88954473  | 1.01294971  | -0.07739831 |
| H  | 2.73322892  | -0.46658224 | 0.39247599  |
| O  | -0.69520992 | -2.96099830 | 1.46360791  |
| H  | -0.31985083 | -3.09278703 | 0.56127381  |
| H  | -1.54375529 | -2.50767541 | 1.26557612  |

**Am(NO<sub>3</sub>)<sub>3</sub>(H<sub>2</sub>O)<sub>4</sub>**

PBE/L1 theoretical level

E= -31261.185570

G= 54.1532 kcal/mol, H= 105.7675 kcal/mol, U= 105.1750 kcal/mol, S= 173.1151 cal/mol at T= 298.150 K

Am 0.06713514 0.46687964 -0.24284039  
N -2.79886293 0.02605263 0.01149526  
O -2.27314067 0.70795095 -0.95175278  
O -3.98163986 -0.19636983 0.10788497  
O -1.92476392 -0.42099205 0.89427108  
N 0.13592091 -1.64116311 -2.27282357  
O 0.07820817 -1.89856589 -0.99310911  
O 0.16058552 -0.37241259 -2.55145907  
O 0.16165528 -2.50507379 -3.11551929  
N 0.11141367 2.81689000 1.48616779  
O -0.42412046 2.81345582 0.29727316  
O 0.12208175 3.79167414 2.19891024  
O 0.63490289 1.67503357 1.83576417  
O 1.11655056 2.11161590 -1.90257215  
H 0.64308649 2.96747279 -1.86902094  
H 1.01431656 1.76169217 -2.81134510  
O 0.91491777 -1.07239008 1.68158519  
H 0.77815431 -0.58801961 2.51986933  
H 0.29322875 -1.89474750 1.70708072  
O 2.57597685 -0.08615001 -0.14185189  
H 3.25181055 0.58746982 0.06114447  
H 2.44765568 -0.62261635 0.68156582  
O -0.85840148 -2.96349478 1.46347153  
H -0.65836138 -3.16133070 0.52195871  
H -1.58831000 -2.30286121 1.38385177

**Cm(NO<sub>3</sub>)<sub>3</sub>(H<sub>2</sub>O)<sub>4</sub>**

PBE/L1 theoretical level

E= -32403.327034



G= 54.7254 kcal/mol, H= 105.8937 kcal/mol, U= 105.3012 kcal/mol, S= 171.6193 cal/mol at T= 298.150 K

Cm 0.15520579 0.41810909 -0.19832096  
N -2.72203827 0.06833909 -0.18989702  
O -2.09969997 0.66250682 -1.15310752  
O -3.91591835 -0.10410449 -0.16617562  
O -1.93341780 -0.35140899 0.78443229  
N 0.34402183 -1.66690385 -2.22729659  
O 0.02165945 -1.92169440 -0.98386335  
O 0.58591336 -0.41337365 -2.46276426  
O 0.40835574 -2.52468777 -3.07399559  
N 0.40501738 2.80899453 1.44601929  
O -0.63250899 2.59557343 0.69520336  
O 0.54196626 3.80205727 2.12078547  
O 1.30245769 1.85184979 1.41445768  
O 0.56330711 2.26871443 -1.87551916  
H -0.10888156 2.97256207 -1.77229524  
H 0.46319327 1.91228354 -2.78223228  
O 0.81837857 -1.07368577 1.76596069  
H 0.77476394 -0.65953147 2.64925265  
H 0.16159032 -1.87639976 1.76945066  
O 2.64212871 -0.24390469 -0.07299761  
H 3.18172669 0.51307493 0.23118652  
H 2.47065926 -0.77601337 0.74214077  
O -0.98641187 -2.90197062 1.46679401  
H -0.74668479 -3.13408732 0.54173040  
H -1.69478405 -2.22629881 1.33105147

### ESP maps of ligands

Gaussian 16<sup>11</sup> was used for optimization of ligands at B3LYP/6-31G(d,p) and to create ESP maps.

### L1

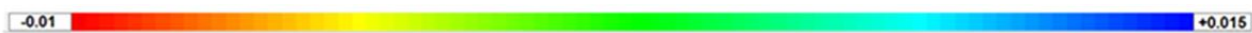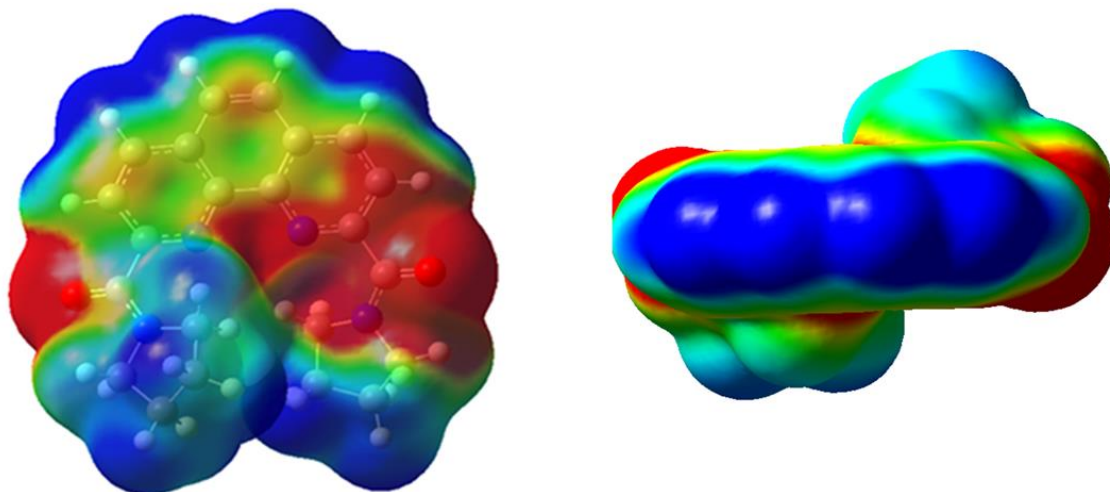

|   |             |             |             |
|---|-------------|-------------|-------------|
| N | 1.32593584  | 1.25527668  | 0.13453819  |
| N | 2.98853183  | -1.12236834 | -0.20659181 |
| N | -1.42311406 | 1.17456985  | -0.12865181 |
| N | -2.90557718 | -1.28621435 | 0.20480818  |
| O | 4.45682907  | 0.00220576  | 1.10306811  |
| O | -4.50823021 | -0.26214826 | -1.02372181 |
| C | 2.63914585  | 1.29034078  | 0.30650815  |
| C | 3.36834192  | 2.49392271  | 0.45793816  |
| H | 4.43502283  | 2.44001579  | 0.63657820  |
| C | 2.68768883  | 3.68666077  | 0.37683818  |
| C | 1.28767884  | 3.68378687  | 0.17900819  |
| C | 0.52360594  | 4.89185476  | 0.07602818  |
| H | 1.04469287  | 5.84254694  | 0.14957818  |
| C | -0.82440406 | 4.85260201  | -0.11465182 |
| H | -1.39814615 | 5.77140999  | -0.20014182 |
| C | -1.51998115 | 3.60251975  | -0.20211181 |
| C | -2.91784000 | 3.52704573  | -0.40001184 |
| C | -3.53178716 | 2.29789376  | -0.46556184 |
| H | -4.59429693 | 2.18129086  | -0.63940179 |
| C | -2.73706412 | 1.13871574  | -0.30182183 |
| C | -0.80492705 | 2.37643170  | -0.08904182 |
| C | 0.64163297  | 2.41904593  | 0.08188818  |

C 3.42388892 -0.00069723 0.42547816  
C -3.44679022 -0.19430524 -0.39579183  
C 1.90388286 -1.27139115 -1.20042181  
H 2.17099094 -0.75537020 -2.13371181  
H 0.97690195 -0.83546323 -0.83359182  
C 1.84088695 -2.78825116 -1.41826189  
H 1.20743787 -3.24833322 -0.65045178  
H 1.42366791 -3.04807210 -2.39489198  
C 3.29996800 -3.23547721 -1.23629189  
H 3.87026691 -3.03382611 -2.15042186  
H 3.40222096 -4.30004740 -1.00967181  
C 3.80494595 -2.34510612 -0.09332182  
H 3.64557695 -2.80832624 0.88892817  
H 4.86623478 -2.09349322 -0.16052182  
C -3.61751413 -2.56953621 0.07472818  
H -3.76073313 -2.81887627 -0.98013180  
H -4.61609411 -2.48724914 0.52255821  
C -2.72444105 -3.56019306 0.83196819  
C -2.06423306 -2.68423223 1.90819812  
C -1.78921711 -1.36738133 1.16737819  
H -1.15290213 -3.11957908 2.32712817  
H -2.76425409 -2.51273417 2.73427820  
H -1.96090007 -3.97039127 0.16065818  
H -3.29190922 -4.39931536 1.24279809  
H -1.77296913 -0.49838126 1.82679808  
H -0.82770705 -1.39073825 0.64525819  
H -3.49203300 4.44437361 -0.50087178  
H 3.21108699 4.63498306 0.46712816

**L2**

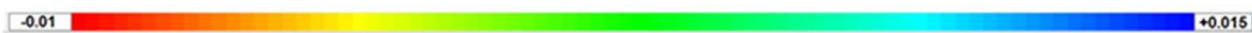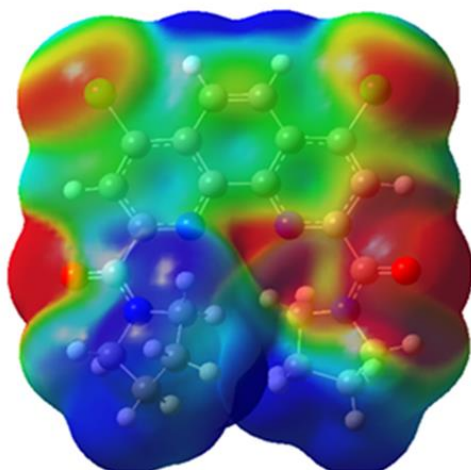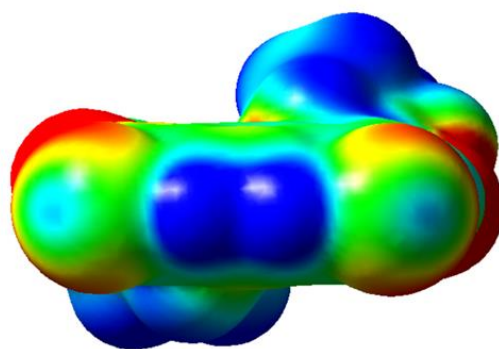

|    |             |             |             |
|----|-------------|-------------|-------------|
| Cl | -3.34050488 | -4.36318207 | 0.43956000  |
| Cl | 4.16207314  | -3.59611607 | -0.46989000 |
| N  | -1.33147800 | -0.30457500 | 0.08970000  |
| N  | -3.13962603 | 1.95556903  | -0.32675999 |
| N  | 1.37852097  | -0.02488500 | -0.07314000 |
| N  | 2.65915203  | 2.54526901  | 0.32799000  |
| O  | -4.57184219 | 0.73954397  | 0.94410998  |
| O  | 4.35595512  | 1.66217506  | -0.88600999 |
| C  | -2.64269805 | -0.42088899 | 0.22141001  |
| C  | -3.30267406 | -1.66274095 | 0.36214000  |
| H  | -4.37392378 | -1.68159497 | 0.51191998  |
| C  | -2.54312992 | -2.80640888 | 0.30726999  |
| C  | -1.13443995 | -2.73516393 | 0.14843000  |
| C  | -0.27848601 | -3.87794089 | 0.06567000  |
| H  | -0.72073299 | -4.86526299 | 0.12396000  |
| C  | 1.06769300  | -3.73921704 | -0.09109000 |
| H  | 1.70054603  | -4.61556387 | -0.16265000 |
| C  | 1.67550898  | -2.44625401 | -0.15871000 |
| C  | 3.06936789  | -2.23228002 | -0.31983000 |
| C  | 3.58314395  | -0.95884800 | -0.36324000 |
| H  | 4.63592291  | -0.75848401 | -0.51234001 |
| C  | 2.68695998  | 0.12272900  | -0.21012001 |

C 0.86739498 -1.27520704 -0.06061000  
C -0.57866502 -1.42458200 0.06632000  
C -3.51950192 0.81399798 0.30256999  
C 3.29349494 1.50889099 -0.27645999  
C -2.03125691 2.16788292 -1.28398001  
H -2.21061492 1.59422195 -2.20393991  
H -1.08364606 1.83404601 -0.86587000  
C -2.09464192 3.67594290 -1.55973995  
H -1.52633405 4.21835518 -0.79479003  
H -1.67206299 3.93411398 -2.53437996  
C -3.59111309 4.00116777 -1.43431997  
H -4.11579180 3.71244597 -2.35225010  
H -3.79106688 5.06085682 -1.25569999  
C -4.04794979 3.11661601 -0.26783001  
H -3.93897200 3.62479591 0.69896001  
H -5.08511877 2.78129292 -0.34053999  
C 3.27476692 3.88116097 0.23083000  
H 3.41082597 4.16048098 -0.81734002  
H 4.27122688 3.86313391 0.68994999  
C 2.30171394 4.78695822 0.99492002  
C 1.69666696 3.84335589 2.04632998  
C 1.52832198 2.52441502 1.27789998  
H 0.75102597 4.20172215 2.46183991  
H 2.39833808 3.70731807 2.87738991  
H 1.51732302 5.15291500 0.32216999  
H 2.80046105 5.65730906 1.42896998  
H 1.57004499 1.64376497 1.92060006  
H 0.57415199 2.48729205 0.74326003

## L3

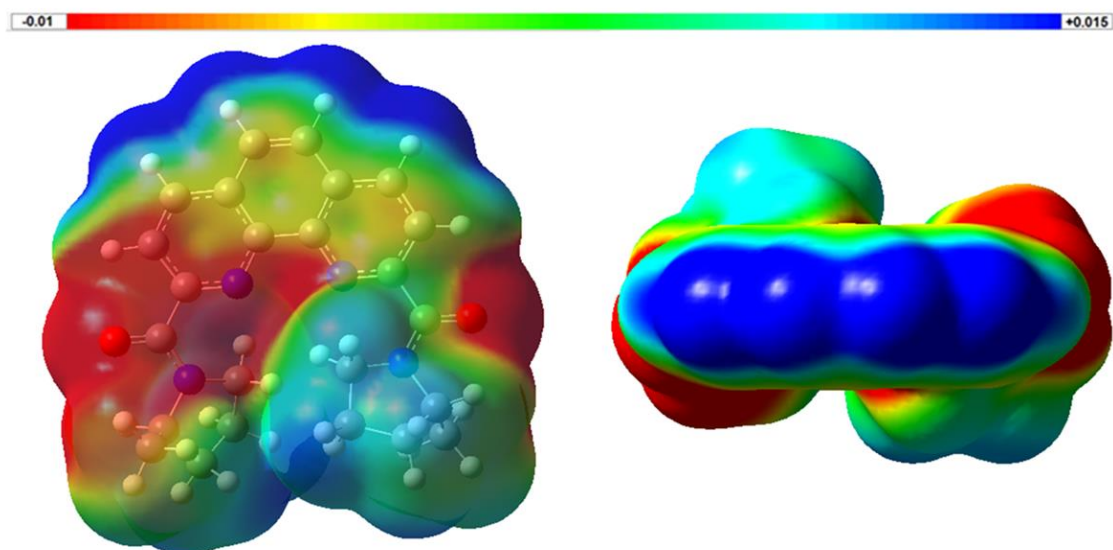

|   |             |             |             |
|---|-------------|-------------|-------------|
| H | 3.33202362  | 4.90114880  | -0.29408324 |
| H | -3.42201638 | 4.86860752  | 0.26880679  |
| N | 1.34890485  | 1.56471467  | -0.08127322 |
| N | 2.87356782  | -0.86179918 | 0.27552676  |
| N | -1.40758514 | 1.55526280  | 0.05286678  |
| N | -2.93791223 | -0.89386326 | -0.31729323 |
| O | 4.51097107  | 0.24230577  | -0.85076320 |
| O | -4.55917883 | 0.21075076  | 0.82765681  |
| C | 2.67109466  | 1.57139087  | -0.17915322 |
| C | 3.43721771  | 2.75668883  | -0.27900323 |
| H | 4.51132774  | 2.67636585  | -0.39134324 |
| C | 2.78186059  | 3.96552086  | -0.23678322 |
| C | 1.37304080  | 3.99539495  | -0.12224322 |
| C | 0.63289475  | 5.22166681  | -0.06889322 |
| H | 1.18025684  | 6.15920448  | -0.11501322 |
| C | -0.72484523 | 5.21610069  | 0.04008678  |
| H | -1.28001320 | 6.14908171  | 0.08586678  |
| C | -1.45386922 | 3.98341274  | 0.09417678  |
| C | -2.86234927 | 3.93868685  | 0.21027677  |
| C | -3.50585222 | 2.72347784  | 0.25420678  |
| H | -4.57867193 | 2.63319087  | 0.37014678  |

C -2.72831535 1.54492569 0.15228677  
C -0.76171225 2.74124074 0.03264678  
C 0.69234776 2.74630690 -0.06113322  
C 3.42248058 0.25930876 -0.26633322  
C -3.47216940 0.22687778 0.23885678  
C 1.81019783 -0.93783623 1.29548681  
H 0.83764678 -1.13194418 0.82978678  
H 1.72163987 0.00009376 1.84205675  
C 2.25803375 -2.11506820 2.17080665  
H 3.00391459 -1.77579021 2.89896679  
H 1.42713284 -2.56236506 2.72345662  
C 2.89890170 -3.06939912 1.15532684  
H 2.11982965 -3.64086699 0.63518679  
H 3.58659959 -3.78937125 1.60729682  
C 3.61708379 -2.14272118 0.15432678  
H 4.65103483 -1.95603418 0.47176677  
C 3.63820267 -2.67990112 -1.27707314  
C -3.72451639 -2.15078115 -0.25179321  
H -4.77803516 -1.89802814 -0.40321323  
C -3.58320832 -2.83117127 1.11438680  
C -3.15628839 -2.97543216 -1.42174315  
C -1.70114720 -2.49712706 -1.53781319  
C -1.79371321 -0.99351627 -1.25157320  
H -1.25438714 -2.70207810 -2.51445341  
H -1.07782817 -2.98612809 -0.78051317  
H -3.70100737 -2.74177122 -2.34377337  
H -3.24466133 -4.05140257 -1.24744320  
H -0.89167124 -0.56996924 -0.81418318  
H -2.00905132 -0.43340623 -2.17203331  
H 4.16029978 -3.64264321 -1.30619323  
H 2.61848164 -2.83206916 -1.64691317

H 4.15594482 -1.98384309 -1.93868315  
H -4.20932007 -3.72907996 1.15583682  
H -2.54637837 -3.12593412 1.30833685  
H -3.90722632 -2.15038013 1.90427685

**L4**

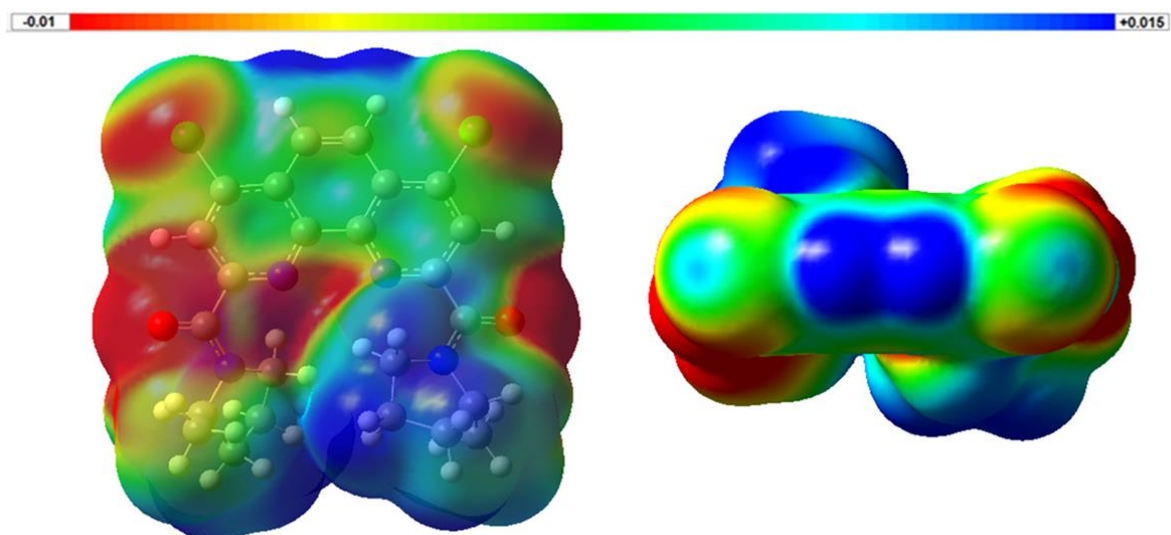

Cl 4.37977839 -4.90177155 -0.25780594  
Cl 6.12345743 2.47765732 0.22914705  
N 1.20562458 -1.65544271 -0.04851696  
N -1.52046049 -2.54835987 0.32970303  
N 1.83630466 0.99541938 0.01881905  
N -0.21292543 3.02793121 -0.38192597  
O -0.84364235 -4.40022039 -0.80562192  
O 1.25320363 4.40155554 0.67930007  
C 0.88709563 -2.93814969 -0.12658295  
C 1.84189963 -3.97551680 -0.21563795  
H 1.50694263 -4.99937057 -0.31646398  
C 3.17201757 -3.63230681 -0.18117695  
C 3.56719160 -2.27216387 -0.09064296  
C 4.92857170 -1.83492470 -0.04976895  
H 5.71546030 -2.57886577 -0.08313996  
C 5.24206066 -0.51143271 0.03125605



H 6.27880669 -0.19892170 0.06582505  
C 4.22106743 0.48943630 0.06772504  
C 4.47476339 1.88359725 0.15032205  
C 3.43903351 2.78645611 0.17351405  
H 3.59685040 3.85287499 0.26470503  
C 2.12002468 2.28549433 0.08441904  
C 2.84934950 0.10472730 0.01926205  
C 2.51220179 -1.31372368 -0.04237796  
C -0.56866443 -3.35171771 -0.21439895  
C 1.00740767 3.31608033 0.14214204  
C -1.33308637 -1.51463366 1.36688602  
H -1.27652848 -0.51782072 0.91588509  
H -0.40556943 -1.67303467 1.91612005  
C -2.58883238 -1.66773069 2.23384619  
H -2.44963360 -2.48413086 2.95190501  
H -2.81735134 -0.75924265 2.79794216  
C -3.66762543 -2.03586483 1.20752501  
H -4.01990843 -1.13191473 0.69497305  
H -4.54042053 -2.52483869 1.64839101  
C -2.94554758 -2.95285487 0.20118105  
H -3.02008247 -4.00314045 0.51076609  
C -3.46611738 -2.82960367 -1.23093796  
C -1.25460041 4.08661556 -0.34817696  
H -0.76939237 5.04341936 -0.56233692  
C -1.91775644 4.18011951 1.03046203  
C -2.21395922 3.66326833 -1.47627497  
C -2.08198738 2.13357711 -1.51914597  
C -0.59037244 1.89522326 -1.25840294  
H -2.40683222 1.69648635 -2.46711993  
H -2.67978144 1.67706633 -0.72213292  
H -1.88478529 4.09323025 -2.42913985

H -3.23697948 4.00357723 -1.29398203  
H -0.37097442 0.94049037 -0.78470194  
H -0.01874340 1.93832624 -2.19566584  
H -4.52837944 -3.09510779 -1.26480901  
H -3.35836363 -1.80162871 -1.59332097  
H -2.92001057 -3.50005078 -1.89625895  
H -2.65011740 4.99449253 1.04076397  
H -2.43479538 3.25021529 1.28989804  
H -1.16489136 4.38714933 1.79378295

## References

---

- <sup>1</sup> C. Reichardt, *Solvents and Solvent Effects in Organic Chemistry*, VCH, Weinheim, 1988.
- <sup>2</sup> P. S. Lempert, P. I. Matveev, A. V. Yatsenko, M. V. Evsiunina, V. S. Petrov, B. N. Tarasevich, V. A. Roznyatovsky, P. V. Dorovatovskii, V. N. Khrustalev, S. S. Zhokhov, V. P. Solov'ev, L. A. Aslanov, V. G. Petrov, S. N. Kalmykov, V. G. Nenajdenko, Y. A. Ustyniuk. «The impact of alicyclic substituents on the extraction ability of new family of 1,10-phenanthroline-2,9-diamides», *RSC Adv.*, **2020**, *10*, pp. 26022–26033, <https://doi.org/10.1039/D0RA05182A>
- <sup>3</sup> A. P. Krapcho; A. Ali. *J. Heterocycl. Chem.*, **2004**, *41(5)*, pp. 795–798.
- <sup>4</sup> O.V. Dolomanov, L.J. Bourhis, R.J. Gildea, J.A.K. Howard, H. Puschmann. *J. Appl. Cryst.* **2009**, *42*, pp. 339-341
- <sup>5</sup> G.M. Sheldrick. *Acta Cryst.* **2015**, *A71*, pp. 3-8
- <sup>6</sup> G.M. Sheldrick. *Acta Cryst.* **2008**, *A64*, pp. 112-122
- <sup>7</sup> Laikov, D. N. Atomic Basis Functions for Molecular Electronic Structure Calculations. *Theor. Chem. Acc.* 2019, *138*, 40.
- <sup>8</sup> Laikov, D. N.; Ustynyuk, Y. A. PRIRODA-04: A Quantum-Chemical Program Suite. New Possibilities in the Study of Molecular Systems with the Application of Parallel Computing. *Russ. Chem. Bull.* 2005, *54*, 820–826.
- <sup>9</sup> Y. A. Ustynyuk, P. S. Lempert, V. A. Roznyatovsky, K. A. Lyssenko, A. O. Gudovanny, P. I. Matveev, E. K. Khult, M. V. Evsiunina, V. G. Petrov, I. P. Gloriozov, A. S. Pozdeev, V. S. Petrov, N. A. Avagyan, A. S. Aldoshin, S. N. Kalmykov, V. G. Nenajdenko. *Molecules* **2022**, *27*, 3114, <https://doi.org/10.3390/molecules27103114>
- <sup>10</sup> D. N. Laikov. *J. Chem. Phys.* **2020**, *153*, pp. 114121, <https://doi.org/10.1063/5.0014639>
- <sup>11</sup> Gaussian 16, Revision C.01, M. J. Frisch, G. W. Trucks, H. B. Schlegel, G. E. Scuseria, M. A. Robb, J. R. Cheeseman, G. Scalmani, V. Barone, G. A. Petersson, H. Nakatsuji, X. Li, M. Caricato, A. V. Marenich, J. Bloino, B. G. Janesko, R. Gomperts, B. Mennucci, H. P. Hratchian, J. V. Ortiz, A. F. Izmaylov, J. L. Sonnenberg, D. Williams-Young, F. Ding, F. Lipparini, F. Egidi, J. Goings, B. Peng, A. Petrone, T. Henderson, D. Ranasinghe, V. G. Zakrzewski, J. Gao, N. Rega, G. Zheng, W. Liang, M. Hada, M. Ehara, K. Toyota, R. Fukuda, J. Hasegawa, M. Ishida, T. Nakajima, Y. Honda, O. Kitao, H. Nakai, T. Vreven, K. Throssell, J. A. Montgomery, Jr., J. E. Peralta, F. Ogliaro, M. J. Bearpark, J. J. Heyd, E. N. Brothers, K. N. Kudin, V. N. Staroverov, T. A. Keith, R. Kobayashi, J. Normand, K. Raghavachari, A. P. Rendell, J. C. Burant, S. S. Iyengar, J. Tomasi, M. Cossi, J. M. Millam, M. Klene, C. Adamo, R. Cammi, J. W. Ochterski, R. L. Martin, K. Morokuma, O. Farkas, J. B. Foresman, and D. J. Fox, Gaussian, Inc., Wallingford CT, 2016.
